# Supplementary material for: Catalytic hydroboration of aldehydes and ketones with an electron-rich acyclic metallasilylene
Source: Royal Society of Chemistry journal article supplement (doi:10.1039/d3sc06842k), 2024-01-01
Supplement: d3sc06842k1.pdf [file d3sc06842k1.pdf]

## Supporting Information

### Catalytic Hydroboration of Aldehydes and Ketones with an Electron-rich Acyclic Metallasilylene

*Leon Kapp,<sup>[a]</sup> Christoph Wölper,<sup>[a]</sup> Hannah Siera,<sup>[b]</sup> Gebhard Haberhauer,<sup>[b]\*</sup> Stephan  
Schulz<sup>[a,c]\*</sup>*

[a] L. Kapp, Dr. C. Wölper, Prof. Dr. S. Schulz, Institute of Inorganic Chemistry, University of Duisburg-Essen, Universitätsstraße 5-7, 45141 Essen (Germany).

[b] Prof. Dr. G. Haberhauer Institute for Organic Chemistry, University of Duisburg-Essen, Universitätsstraße 5-7, 45117 Essen (Germany).

[c] Center for Nanointegration Duisburg-Essen (CENIDE), University of Duisburg-Essen, Carl-Benz-Straße 199, 47057 Duisburg (Germany).

Corresponding author: [stephan.schulz@uni-due.de](mailto:stephan.schulz@uni-due.de)

## **Content**

### **I. Spectroscopic Characterization**

**Fig. S1 – S5.**  $^1\text{H}$ ,  $^{13}\text{C}$  NMR,  $^{29}\text{Si}$  NMR and IR spectra of  $\text{L}'\text{Si}[\text{OCHCH}_2\text{CHMe}_2]\text{Ga}(\text{Cl})\text{L}$  (**1**).

**Fig. S6 – S9.**  $^1\text{H}$ ,  $^{13}\text{C}$  NMR, and IR spectra of  $\text{L}'\text{SiOCH}[\text{Ga}(\text{Cl})\text{L}]\text{CH}_2\text{CHMe}_2$  (**2**).

**Fig. S10 – S29.**  $^1\text{H}$  NMR spectra of catalytic reactions and mechanistic studies.

### **II. Catalytic Studies**

**Table S1.** Catalytic Table.

Characterization of catalytic products.

**Fig. S30 – S33.** Investigations of reaction kinetics.

### **III. Single Crystal X-ray Diffraction**

**Table S2.** Crystal data and structure refinement of **1** and **2**.

**Figure S34, S35.** Molecular structure of **1** and **2**.

### **IV. Quantum chemical calculations**

**Figure S36 – S42.** Calculated Gibbs energies for the studied reactions.

### **VI. Absolute Energies and Cartesian Coordinates for the Calculated Compounds**

**Table S3 – S6.** Absolute energies and entropies calculated by means of different methods.

### **V. References**

## I. Spectroscopic Characterization

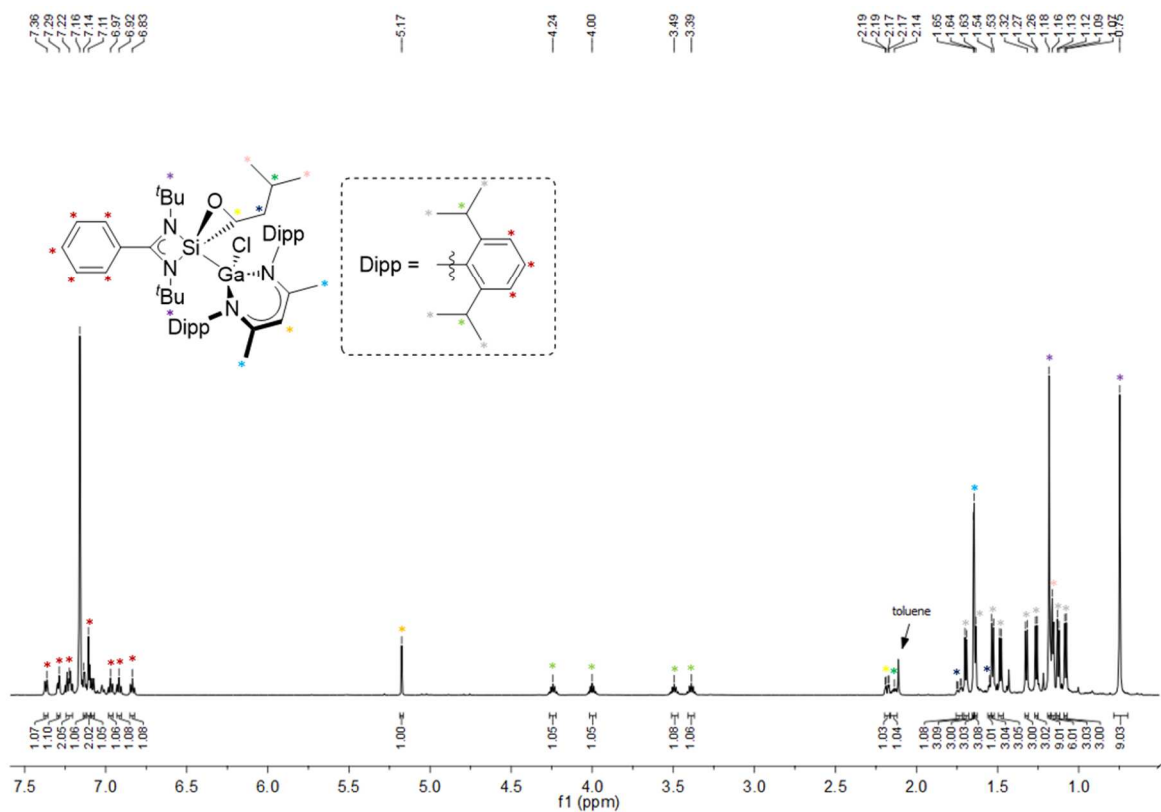

Figure S1.  $^1H$  NMR spectrum of  $L'Si[OCHCH_2CHMe_2]Ga(Cl)L$  (1) in  $C_6D_6$  at room temperature.

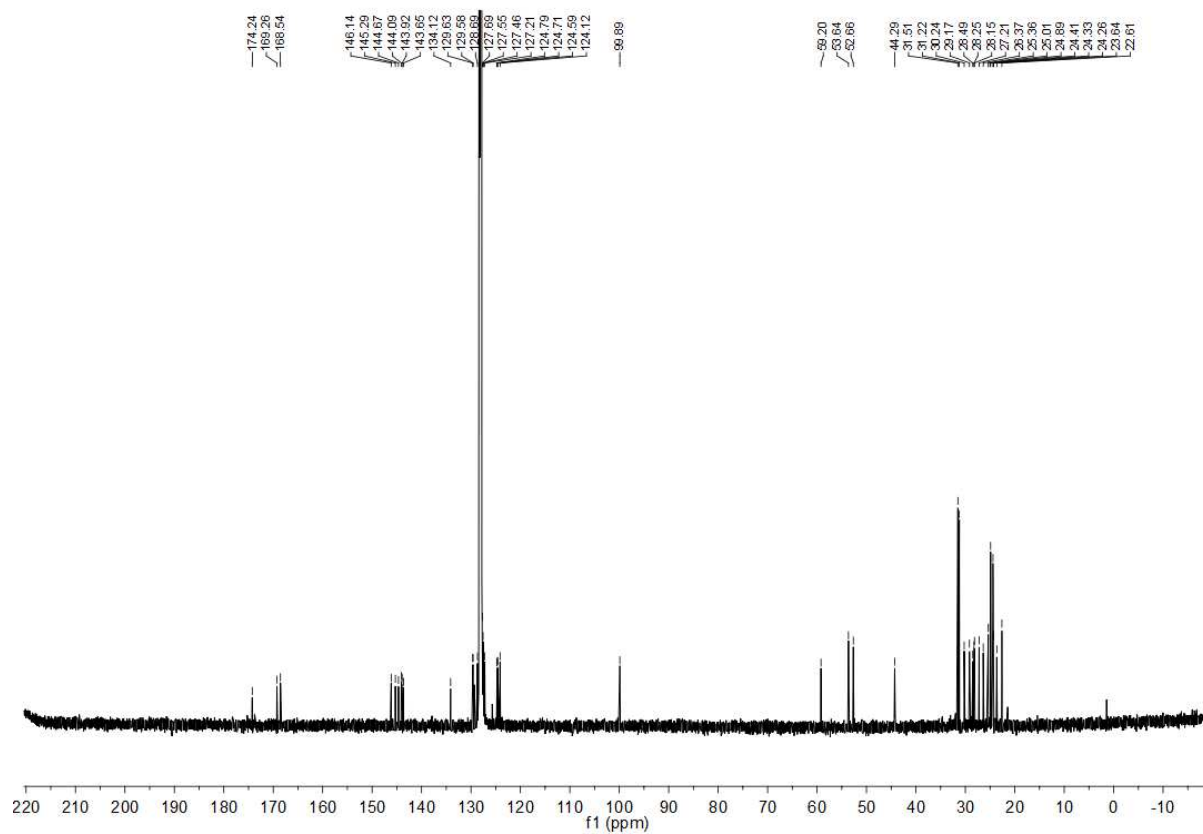

Figure S2.  $^{13}C$  NMR spectrum of  $L'Si[OCHCH_2CHMe_2]Ga(Cl)L$  (1) in  $C_6D_6$  at room temperature.

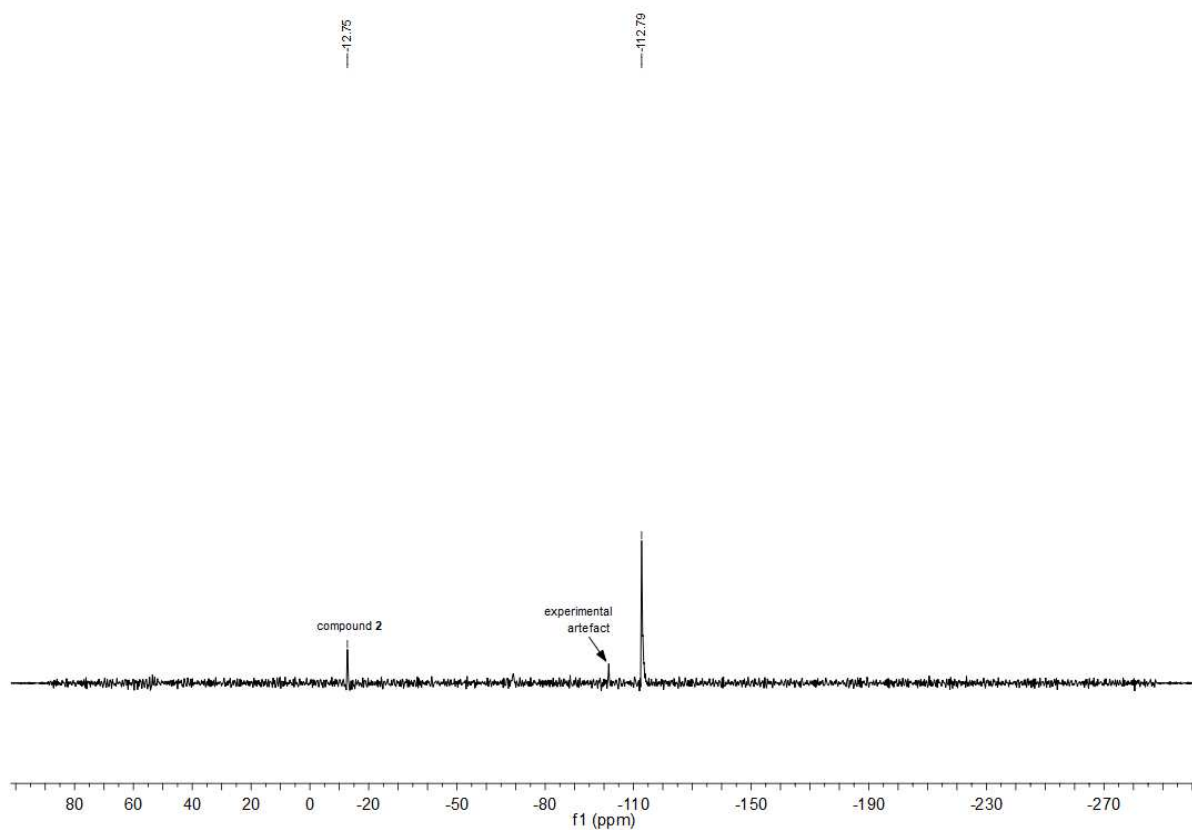

**Figure S3.**  $^{29}\text{Si}$  NMR spectrum of  $\text{L'Si}[\text{OCHCH}_2\text{CHMe}_2]\text{Ga}(\text{Cl})\text{L}$  (**1**) in  $\text{C}_6\text{D}_6$  at room temperature

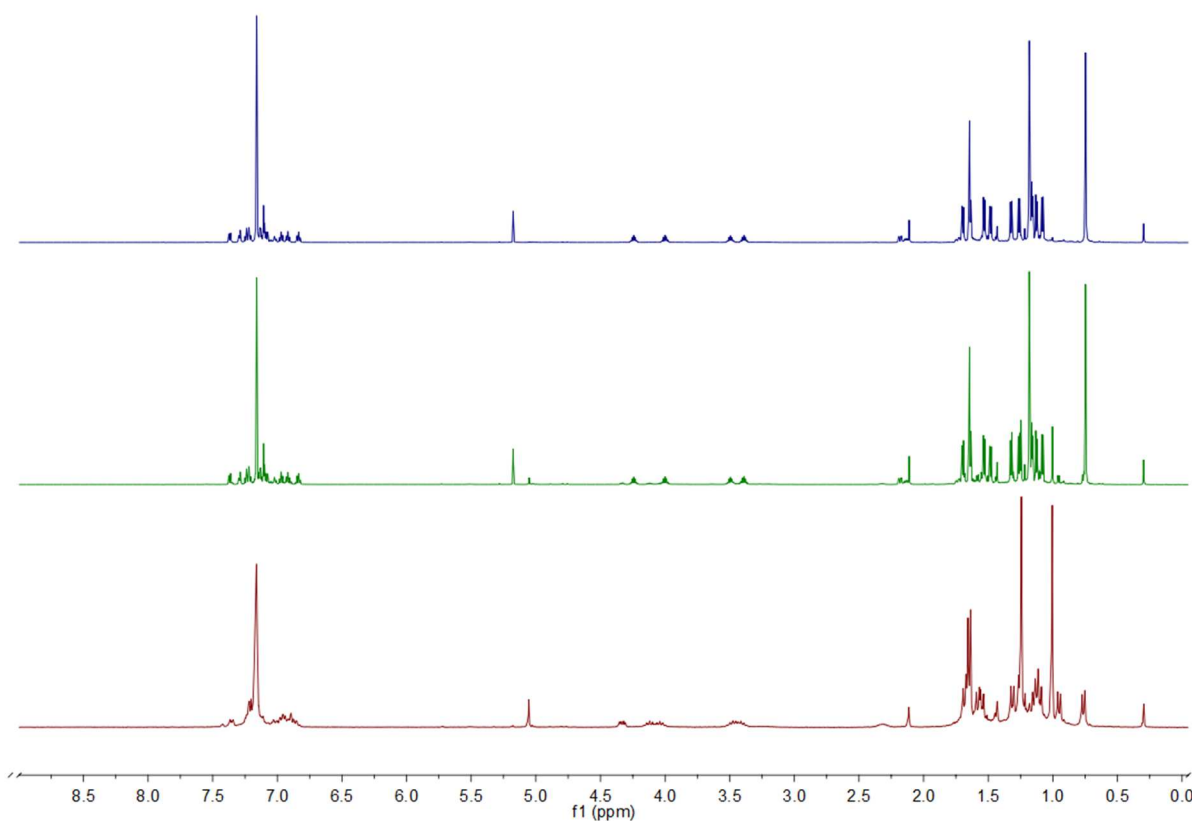

**Figure S4.**  $^1\text{H}$  NMR spectra of  $\text{L'Si}[\text{OCHCH}_2\text{CHMe}_2]\text{Ga}(\text{Cl})\text{L}$  (**1**) in  $\text{C}_6\text{D}_6$  at room temperature after 3 h and 24 h, showing conversion of compound **1** to compound **2**.

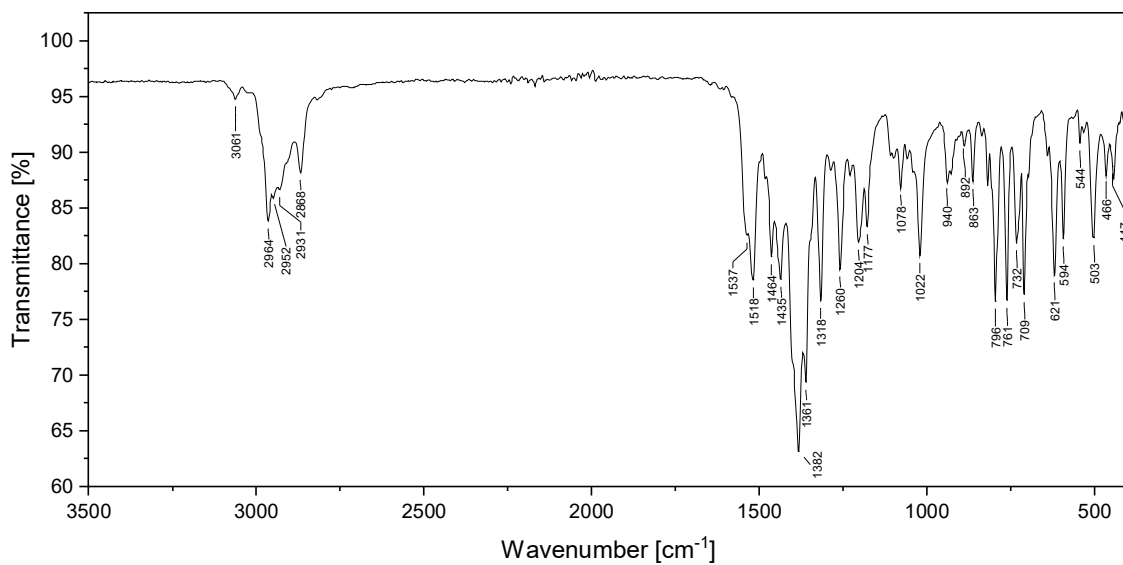

**Figure S5.** IR spectrum of L'Si[OCHCH<sub>2</sub>CHMe<sub>2</sub>]Ga(Cl)L (**1**).

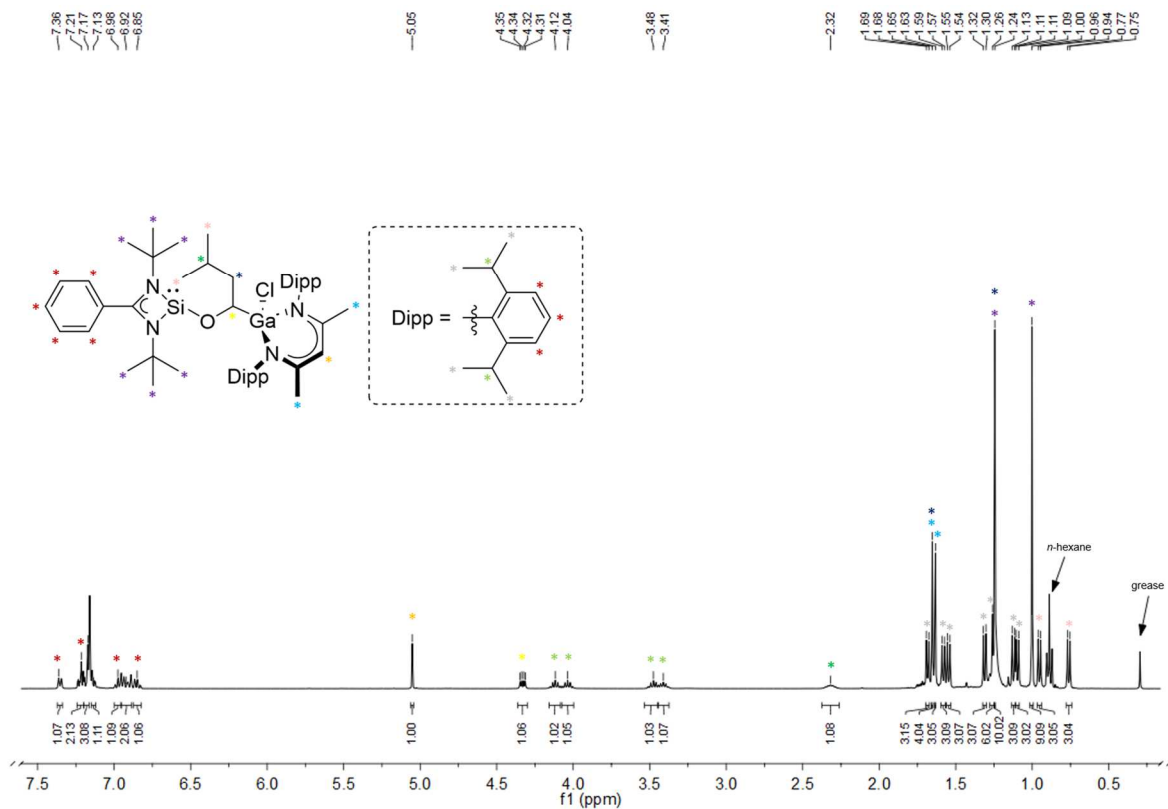

**Figure S6.** <sup>1</sup>H NMR spectrum of L'SiOCH[Ga(Cl)L]CH<sub>2</sub>CHMe<sub>2</sub> (**2**) in C<sub>6</sub>D<sub>6</sub> at room temperature.

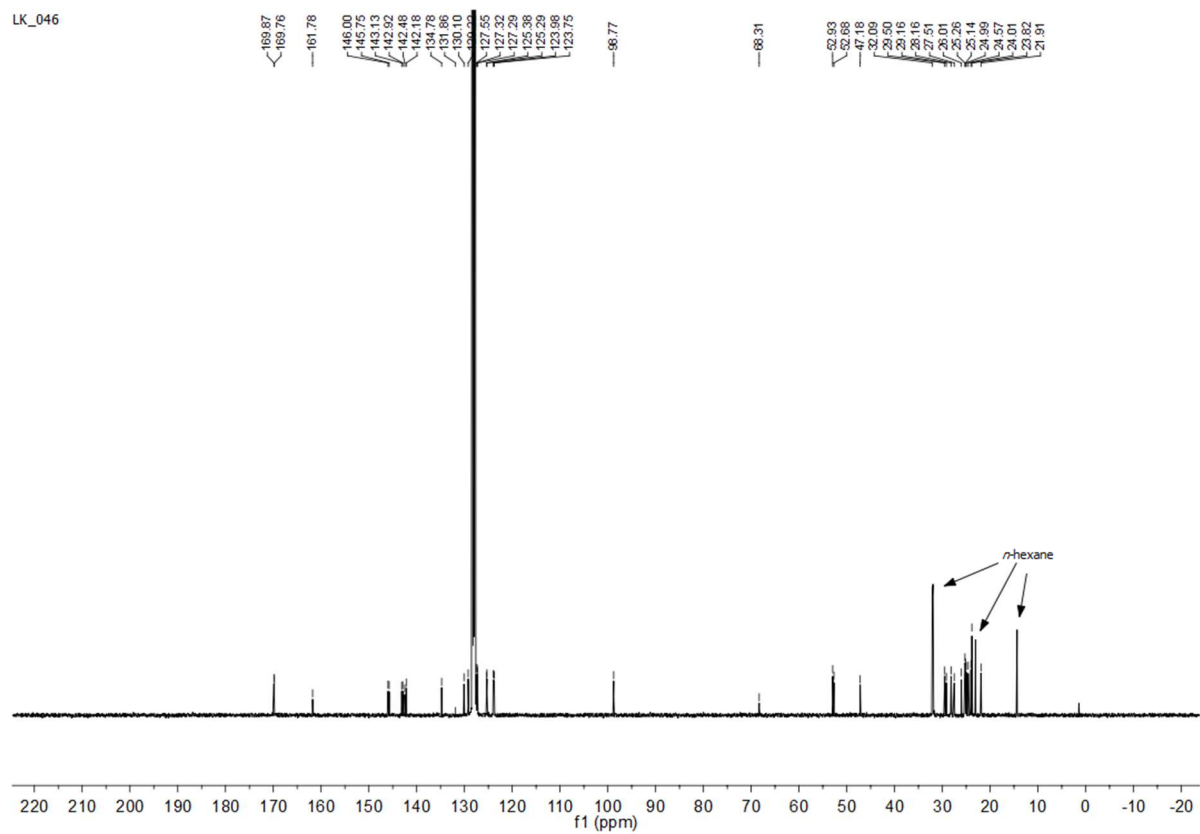

**Figure S7.**  $^{13}\text{C}$  NMR spectrum of  $\text{L}'\text{SiOCH}[\text{Ga}(\text{Cl})\text{L}]\text{CH}_2\text{CHMe}_2$  (**2**) in  $\text{C}_6\text{D}_6$  at room temperature.

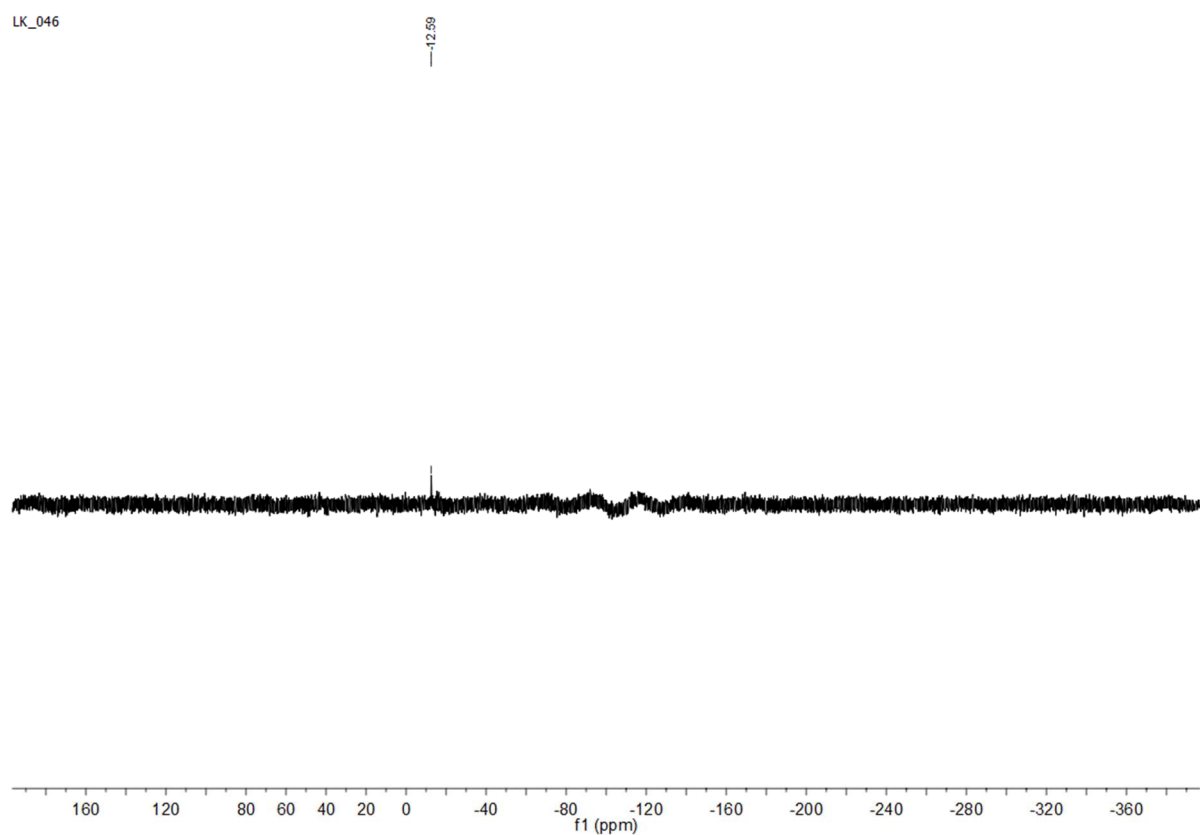

**Figure S8.**  $^{29}\text{Si}$  NMR spectrum of  $\text{L}'\text{SiOCH}[\text{Ga}(\text{Cl})\text{L}]\text{CH}_2\text{CHMe}_2$  (**2**) in  $\text{C}_6\text{D}_6$  at room temperature.

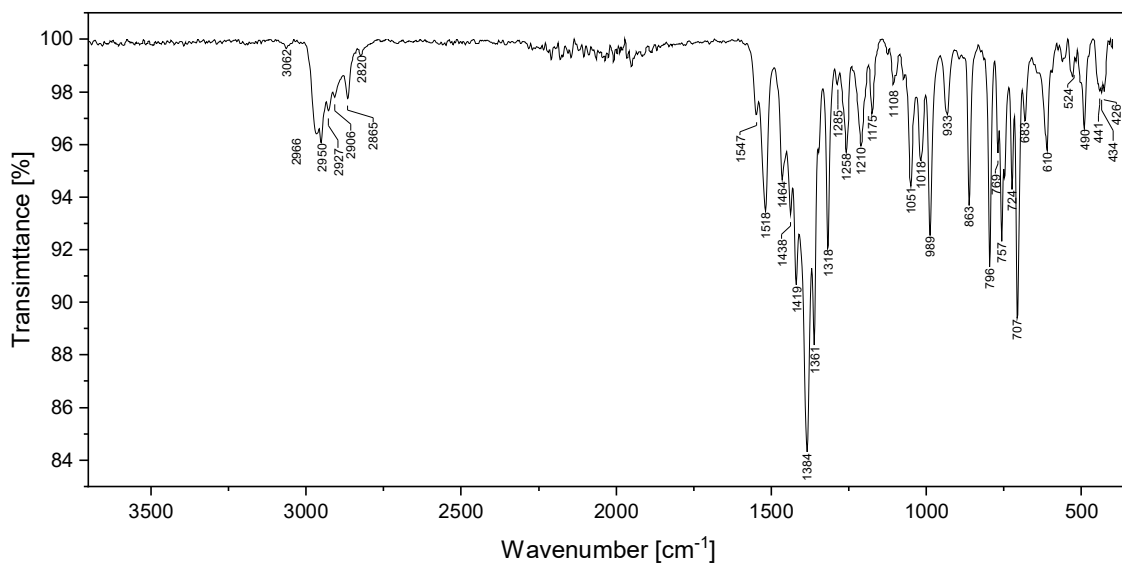

**Figure S9.** IR spectrum of L'SiOCH[Ga(Cl)L]CH<sub>2</sub>CHMe<sub>2</sub> (**2**).

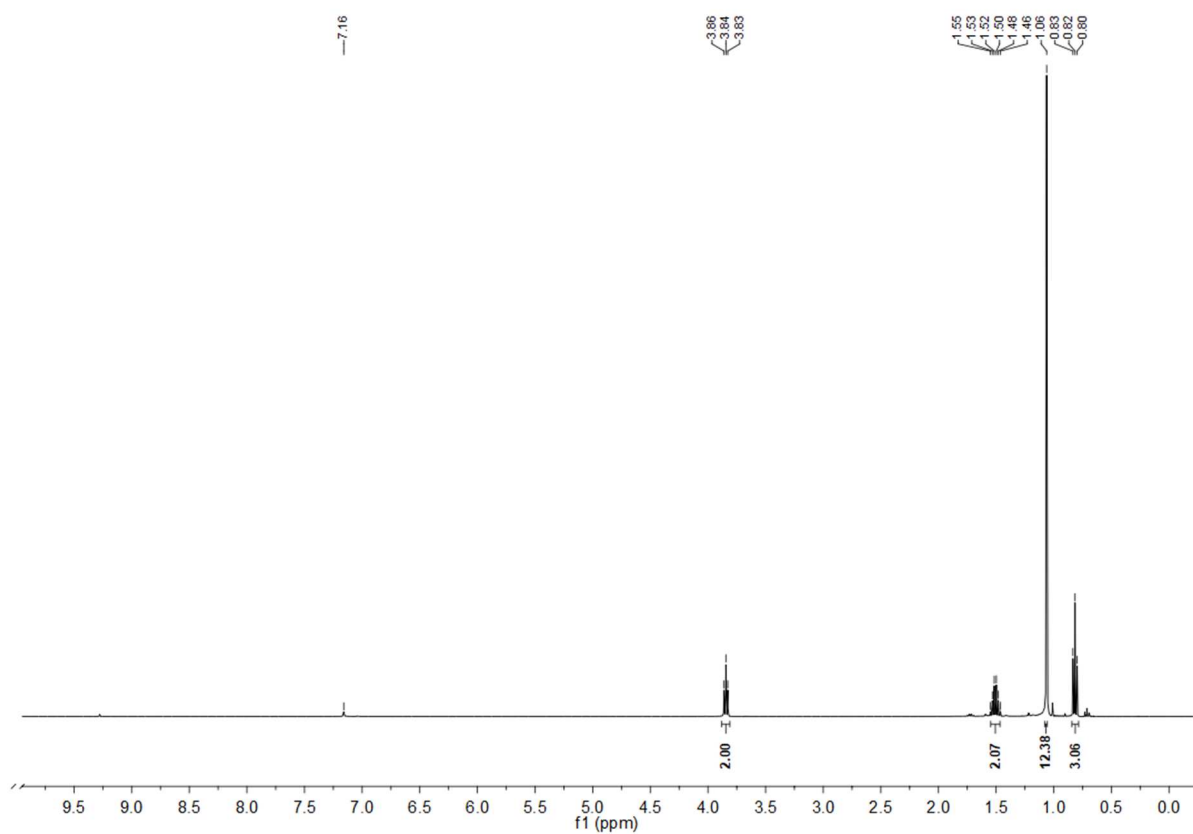

**Figure S10.** Crude <sup>1</sup>H NMR spectrum of the catalytic reaction (*n*-propanal and HBPIn) with 1 mol% of **2** in C<sub>6</sub>D<sub>6</sub> at room temperature.

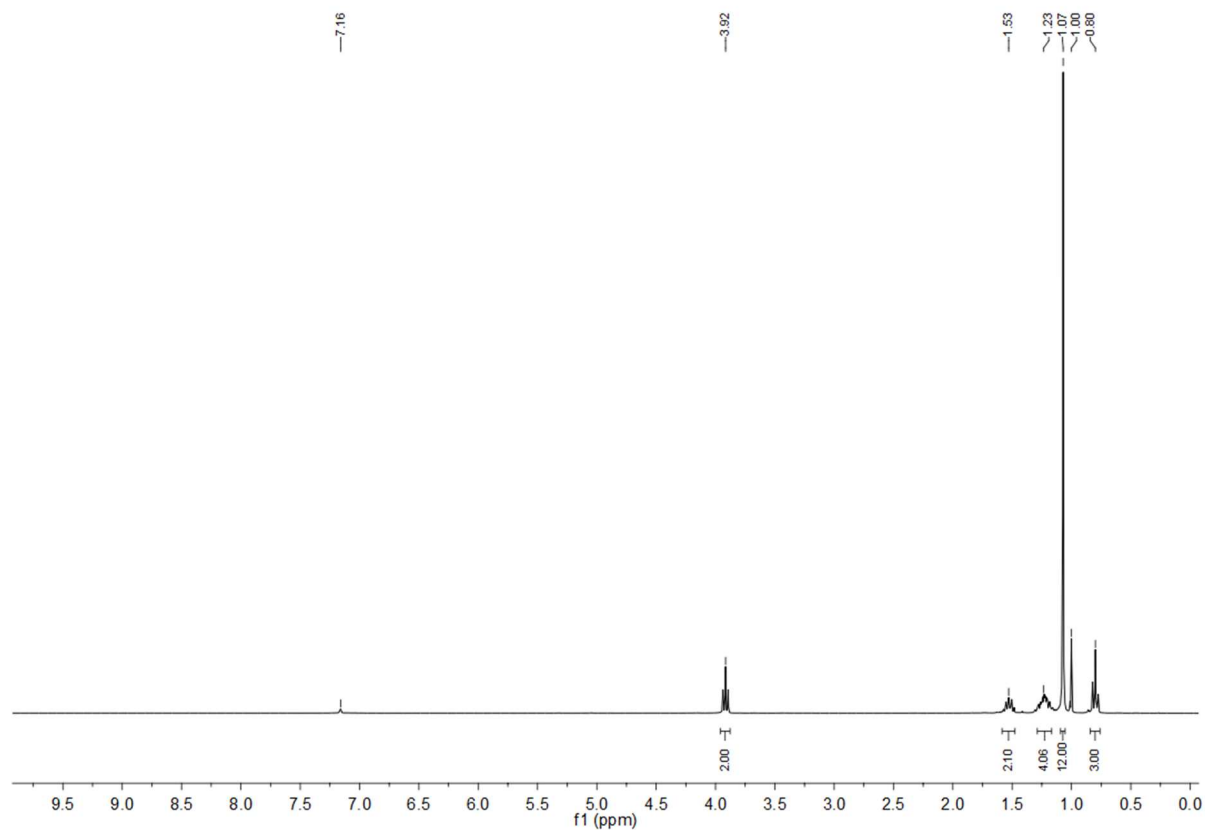

**Figure S11.** Crude  $^1\text{H}$  NMR spectrum of the catalytic reaction (*n*-pentanal and HBPin) with 1 mol% of **2** in  $\text{C}_6\text{D}_6$  at room temperature.

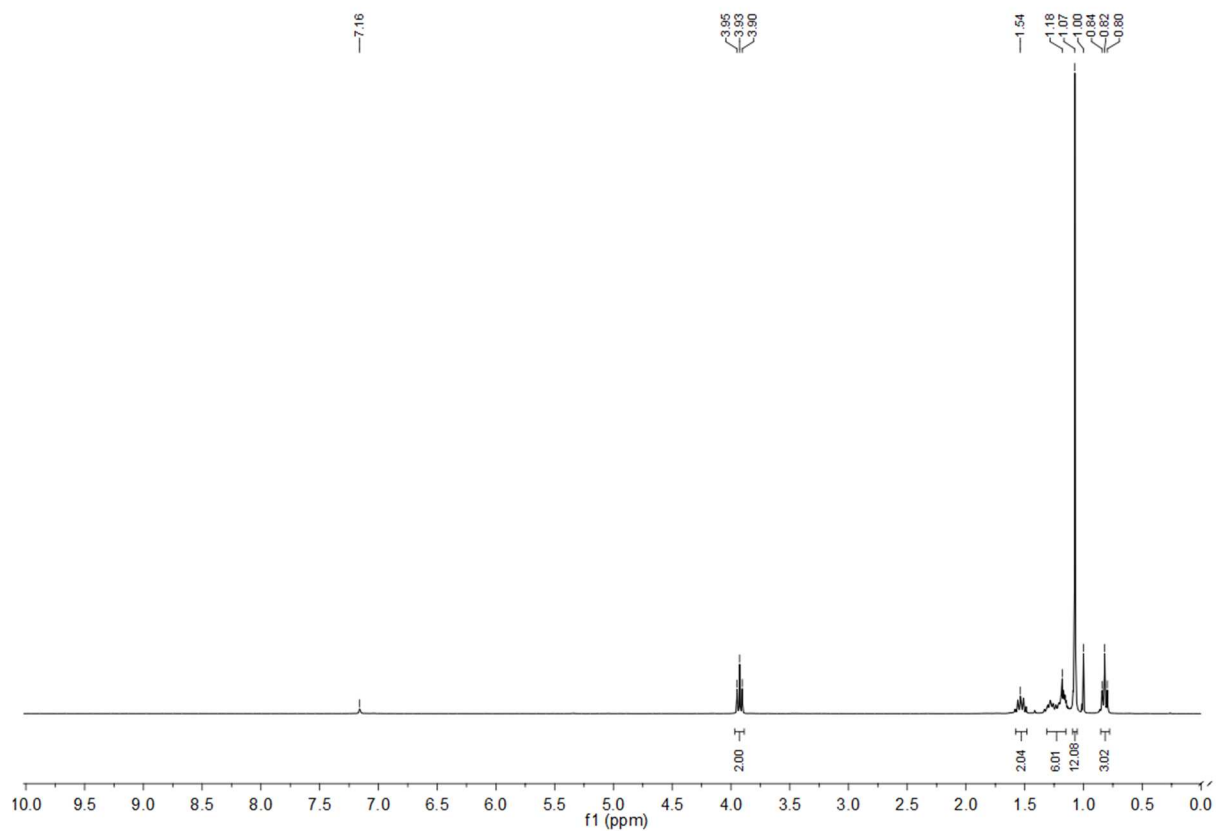

**Figure S12.** Crude  $^1\text{H}$  NMR spectrum of the catalytic reaction (*n*-hexanal and HBPin) with 1 mol% of **2** in  $\text{C}_6\text{D}_6$  at room temperature.



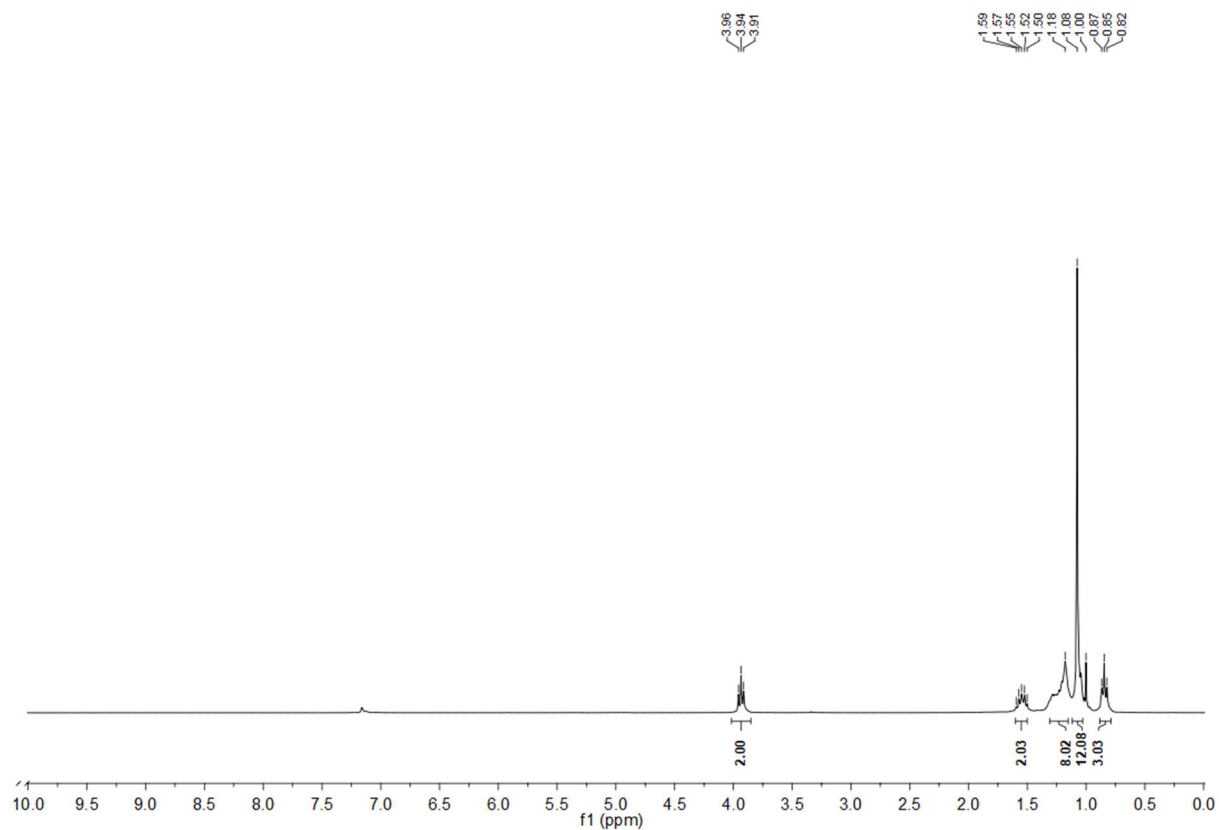

**Figure S13.** Crude  $^1\text{H}$  NMR spectrum of the catalytic reaction (*n*-heptanal and HBPin) with 1 mol% of **2** in  $\text{C}_6\text{D}_6$  at room temperature.

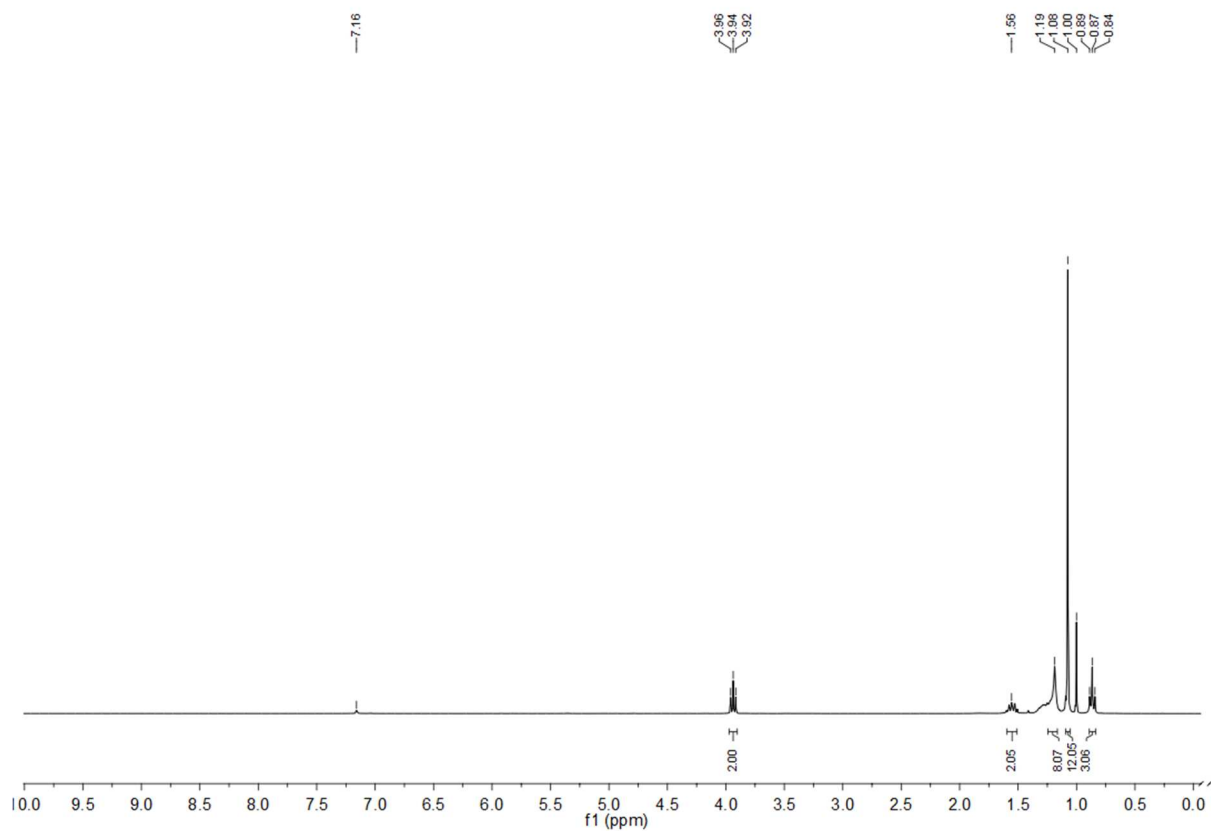

**Figure S14.** Crude  $^1\text{H}$  NMR spectrum of the catalytic reaction (*n*-octanal and HBPin) with 1 mol% of **2** in  $\text{C}_6\text{D}_6$  at room temperature.

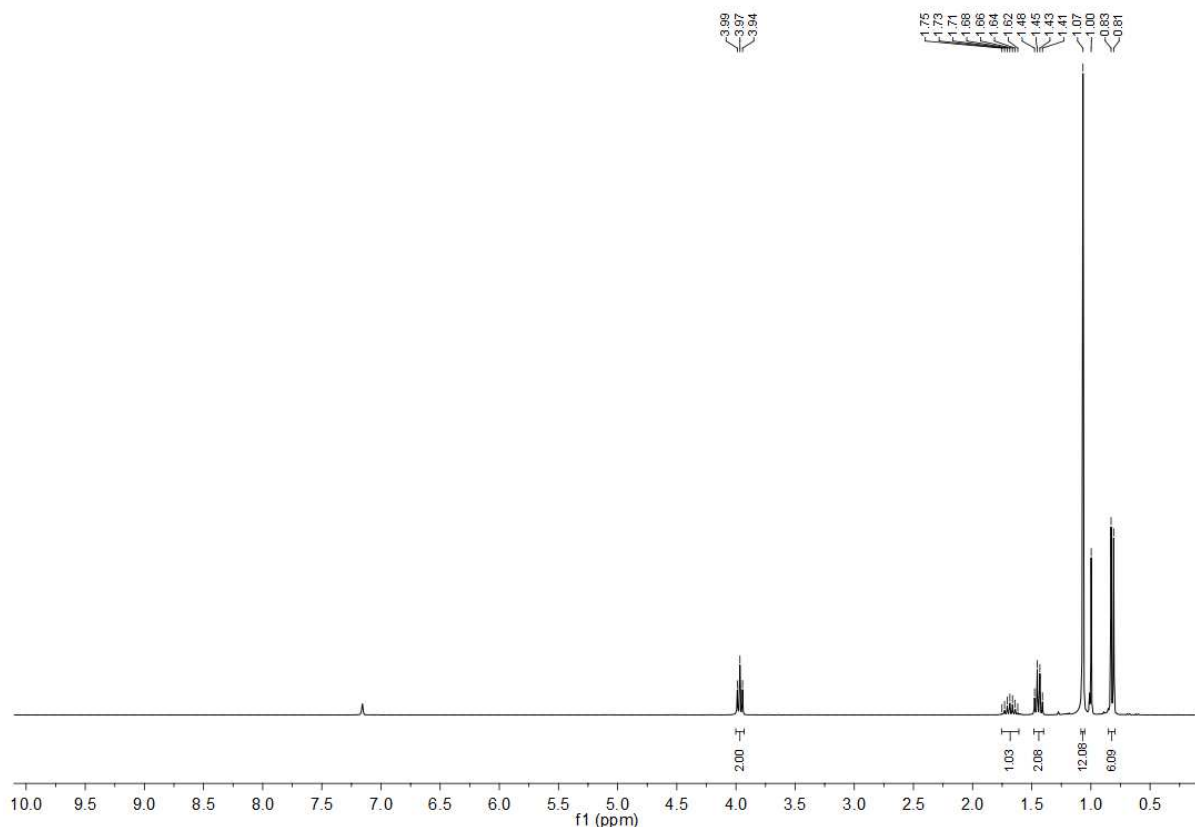

**Figure S15.** Crude  $^1\text{H}$  NMR spectrum of the catalytic reaction (*iso*-valeraldehyde and HBPIn) with 1 mol% of **2** in  $\text{C}_6\text{D}_6$  at room temperature.

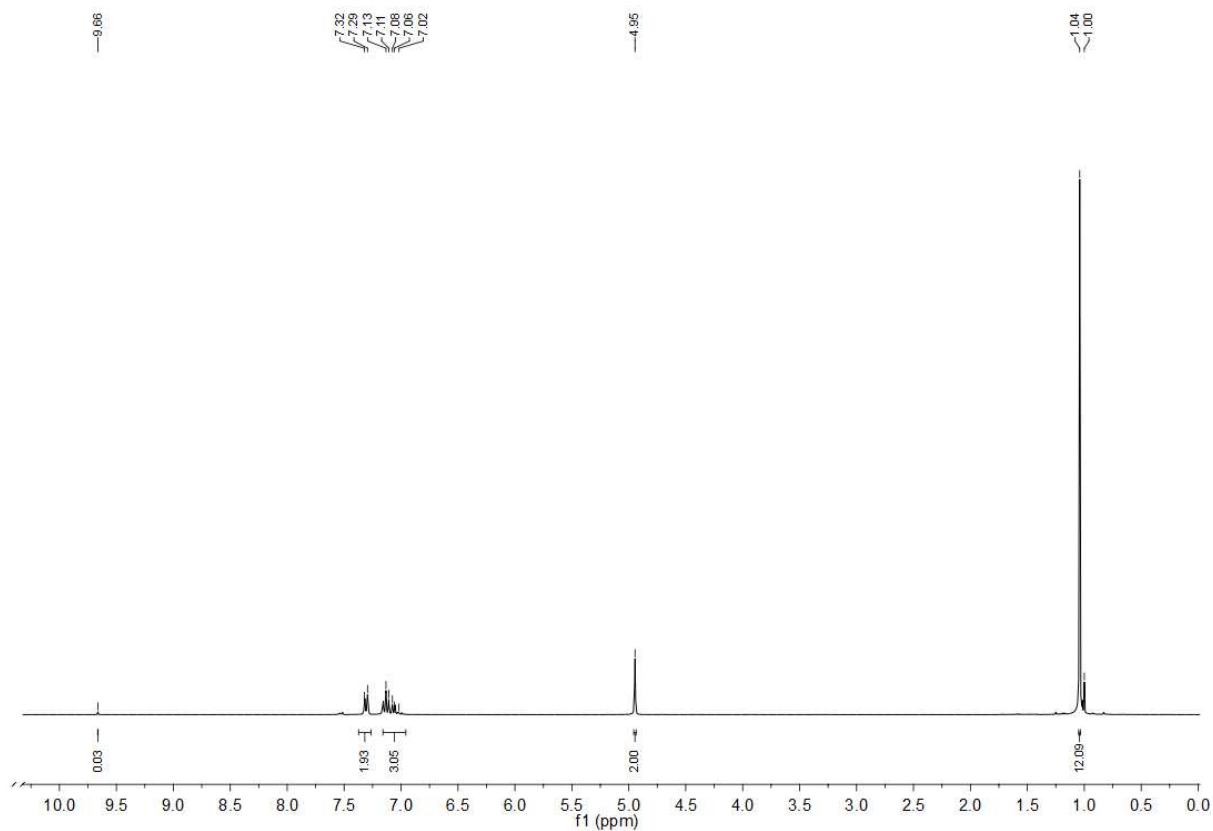

**Figure S16.** Crude  $^1\text{H}$  NMR spectrum of the catalytic reaction (benzaldehyde and HBPIn) with 1 mol% of **2** in  $\text{C}_6\text{D}_6$  at room temperature.

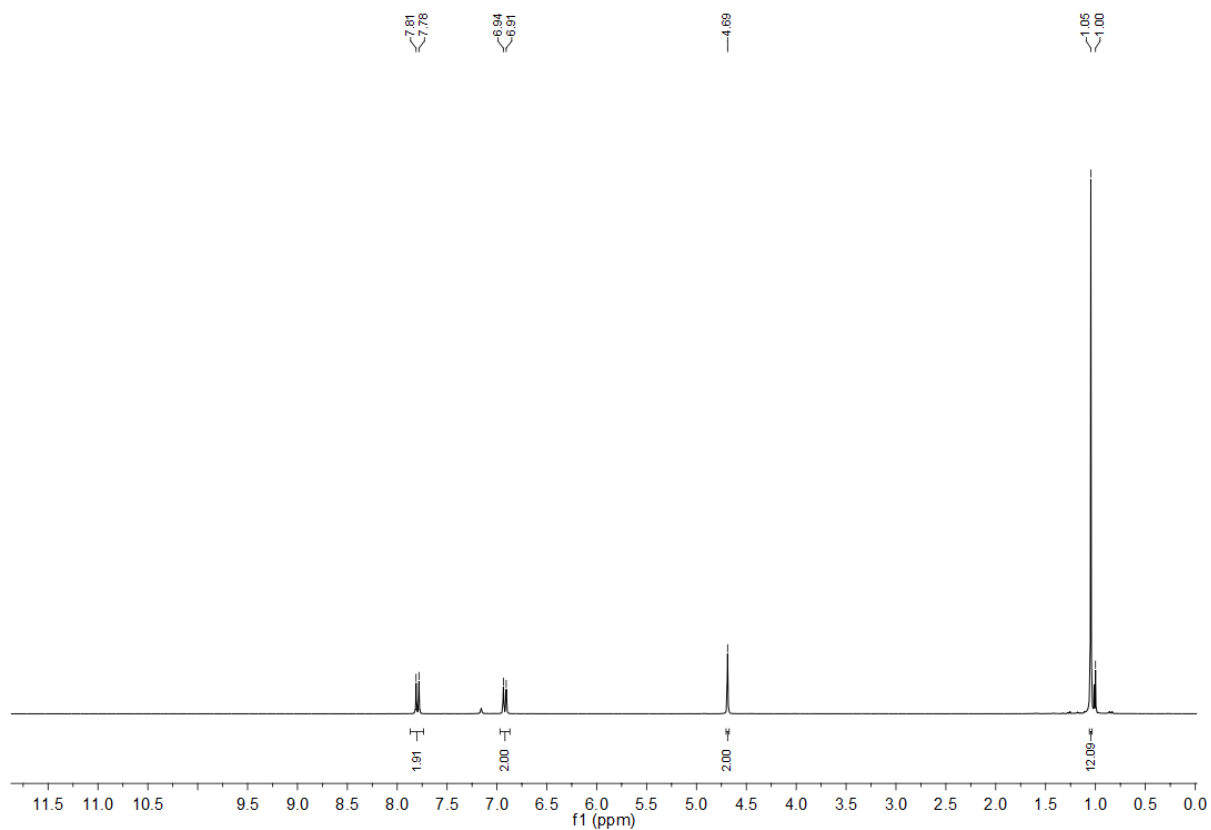

**Figure S17.** Crude  $^1\text{H}$  NMR spectrum of the catalytic reaction (4-nitrobenzaldehyde and HBPIn) with 1 mol% of **2** in  $\text{C}_6\text{D}_6$  at room temperature.

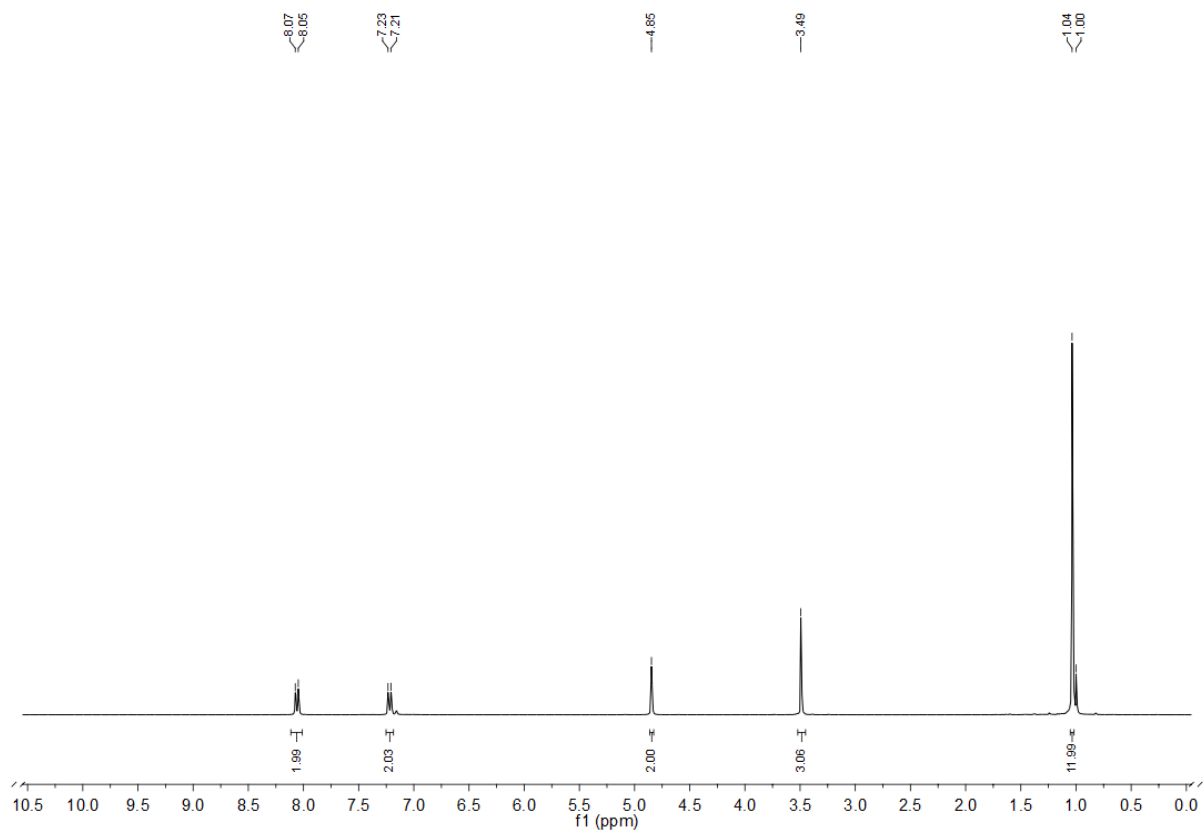

**Figure S18.** Crude  $^1\text{H}$  NMR spectrum of the catalytic reaction (4-formylbenzoic acid and HBPIn) with 1 mol% of **2** in  $\text{C}_6\text{D}_6$  at room temperature.

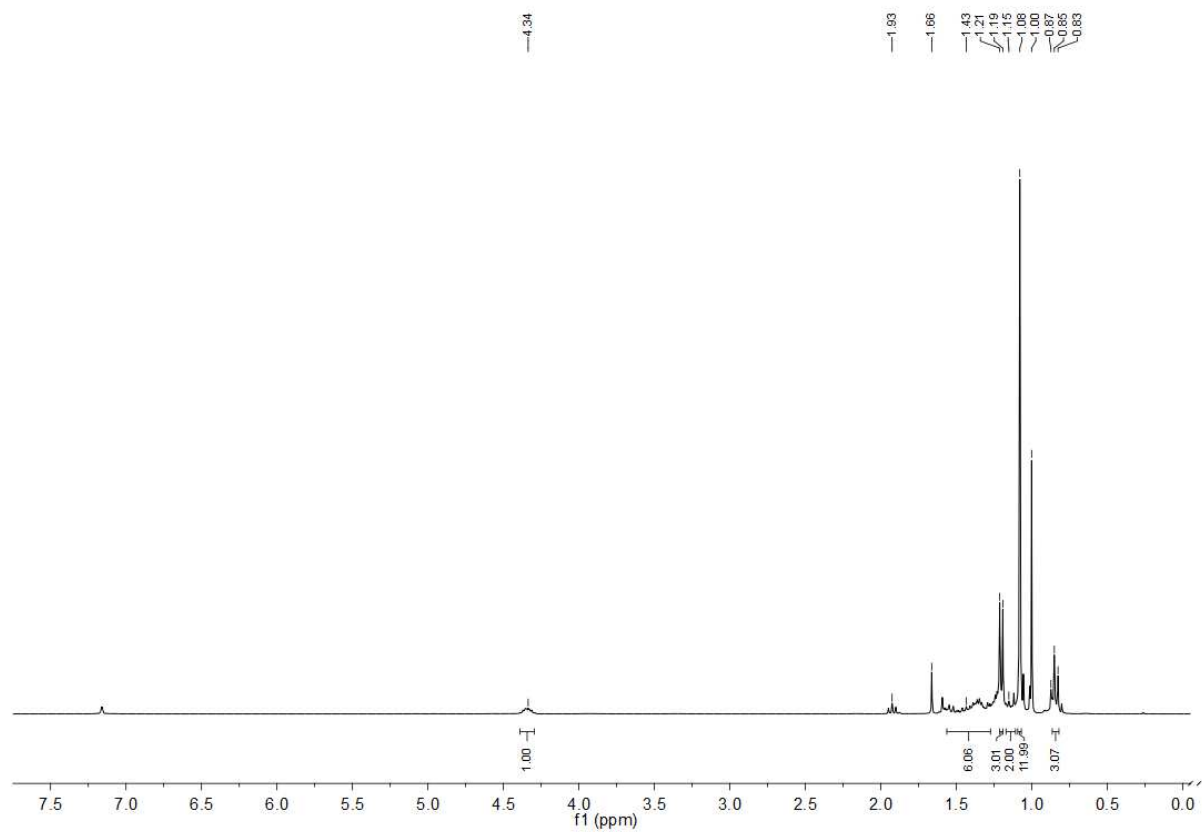

**Figure S19.** Crude  $^1\text{H}$  NMR spectrum of the catalytic reaction (2-heptanone and HBPIn) with 1 mol% of **2** in  $\text{C}_6\text{D}_6$  at room temperature.

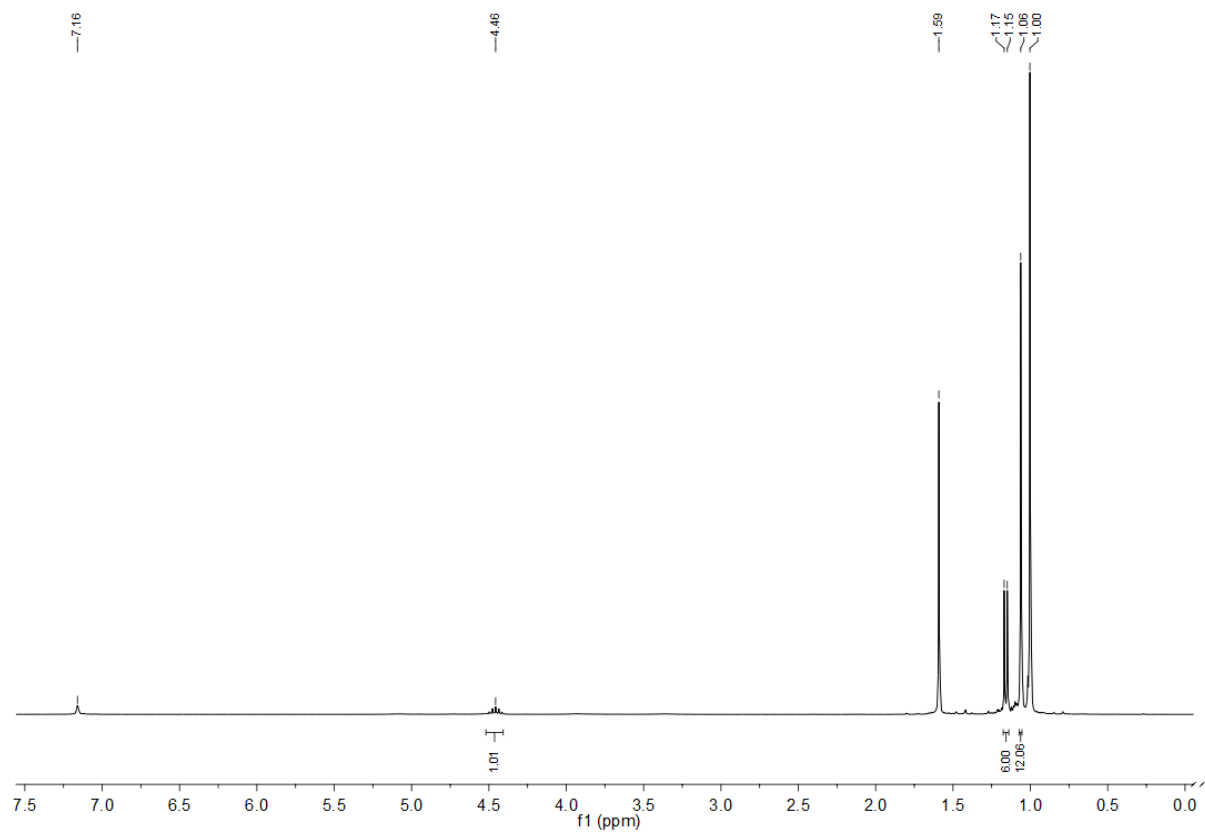

**Figure S20.** Crude  $^1\text{H}$  NMR spectrum of the catalytic reaction (acetone and HBPIn) with 1 mol% of **2** in  $\text{C}_6\text{D}_6$  at room temperature.

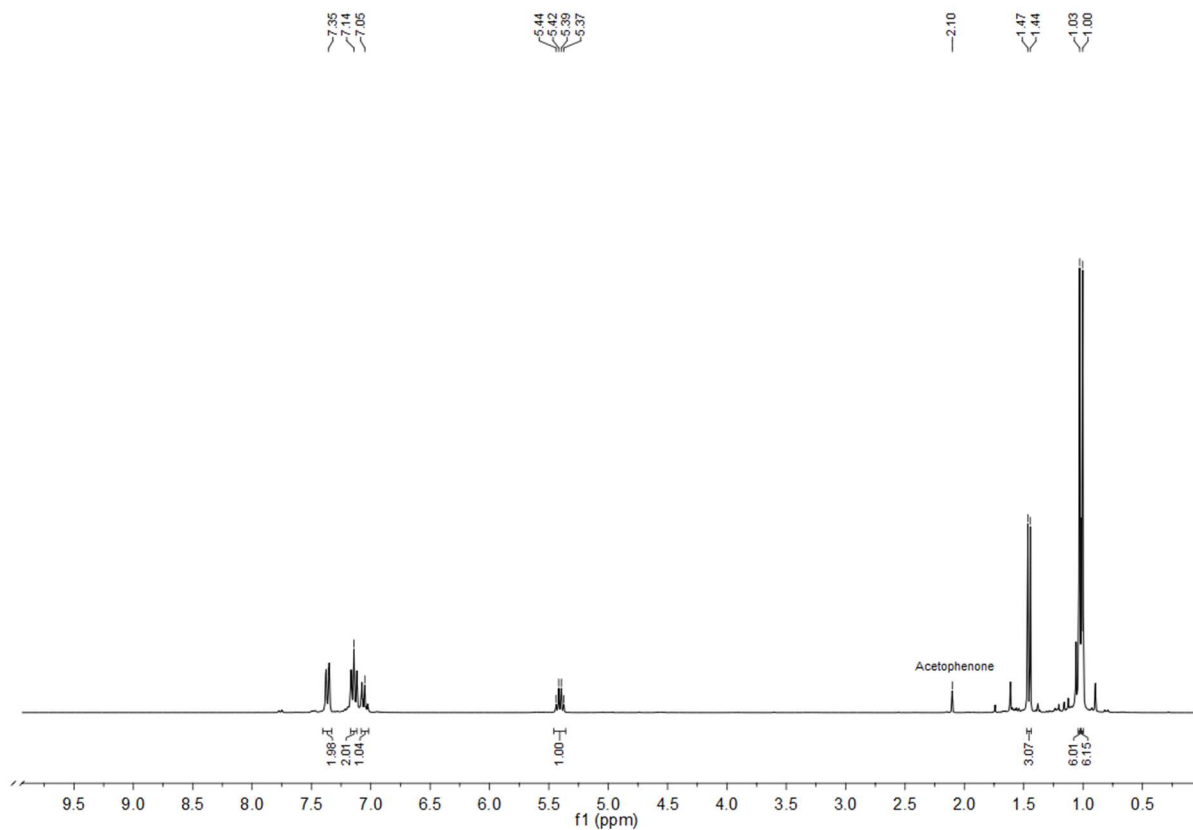

**Figure S21.** Crude  $^1\text{H}$  NMR spectrum of the catalytic reaction (acetophenone and HBPIn) with 1 mol% of **2** in  $\text{C}_6\text{D}_6$  at room temperature.

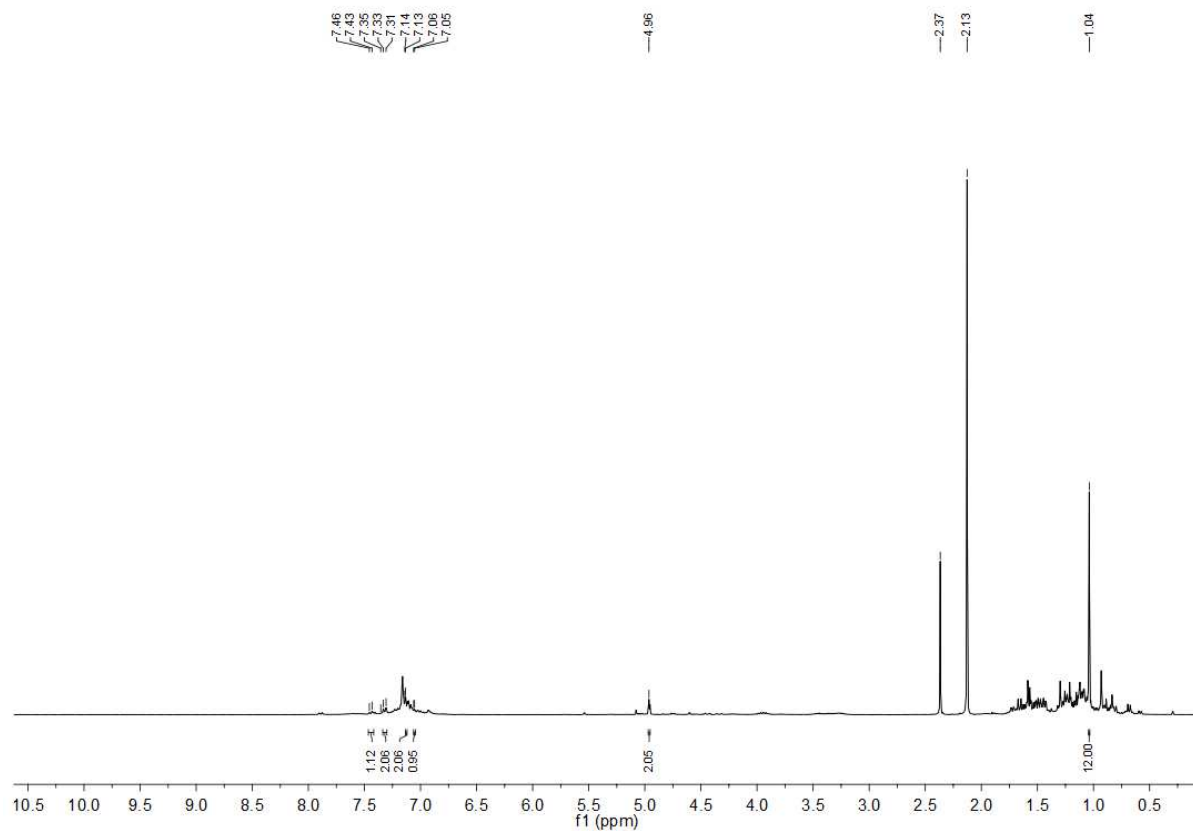

**Figure S22.** Crude  $^1\text{H}$  NMR spectrum of the catalytic reaction (benzaldehyde + HBPIn + 10 mol% **2**) with two equivalents of TMEDA in  $\text{C}_6\text{D}_6$  at room temperature.

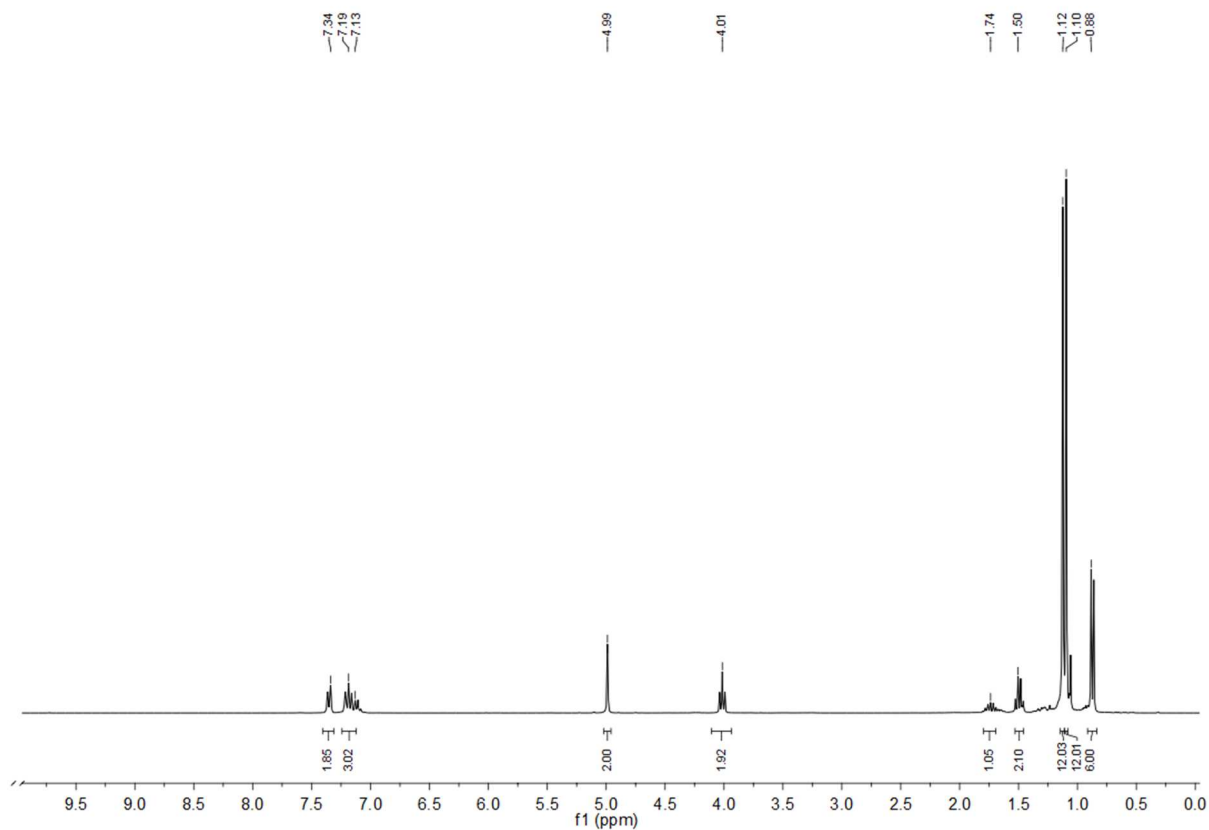

**Figure S23.** Crude  $^1\text{H}$  NMR spectrum of the living catalytic reaction (*iso*-valeraldehyde, benzaldehyde and HBPIn) with 1 mol% of **2** in  $\text{C}_6\text{D}_6$  at room temperature.

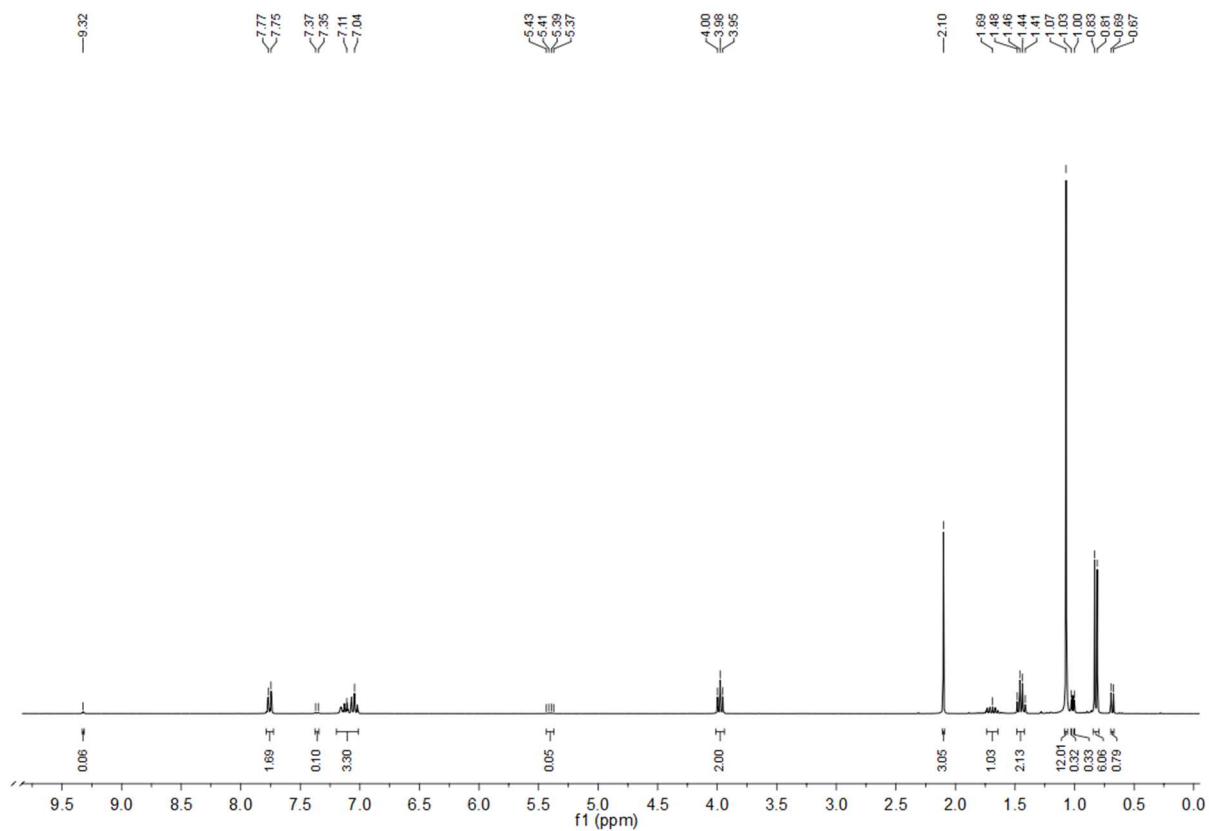

**Figure S24.** Crude  $^1\text{H}$  NMR spectrum of the chemo selective catalytic reaction (*iso*-valeraldehyde, acetophenone and HBPIn) with 1 mol% of **2** in  $\text{C}_6\text{D}_6$  at room temperature.

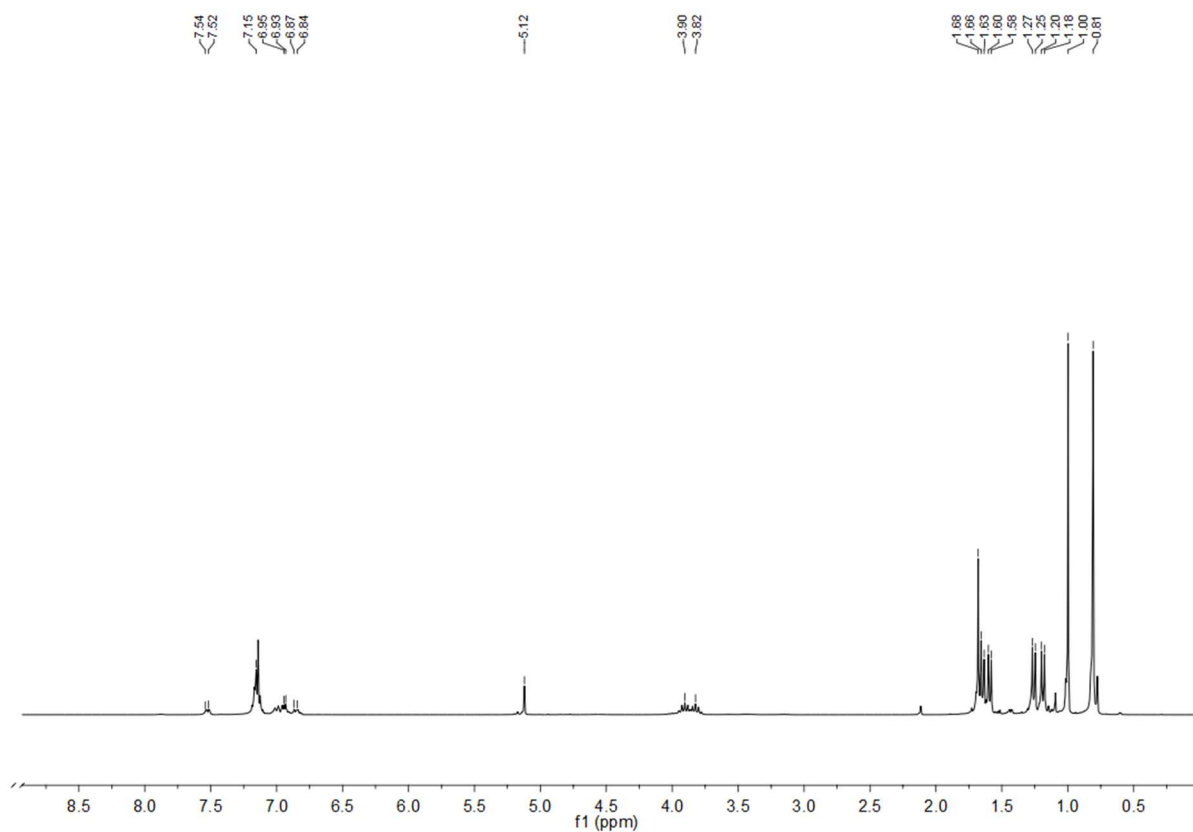

**Figure S25.** Crude  $^1\text{H}$  NMR spectrum of C and HBP in showing no reaction in  $\text{C}_6\text{D}_6$  at room temperature.

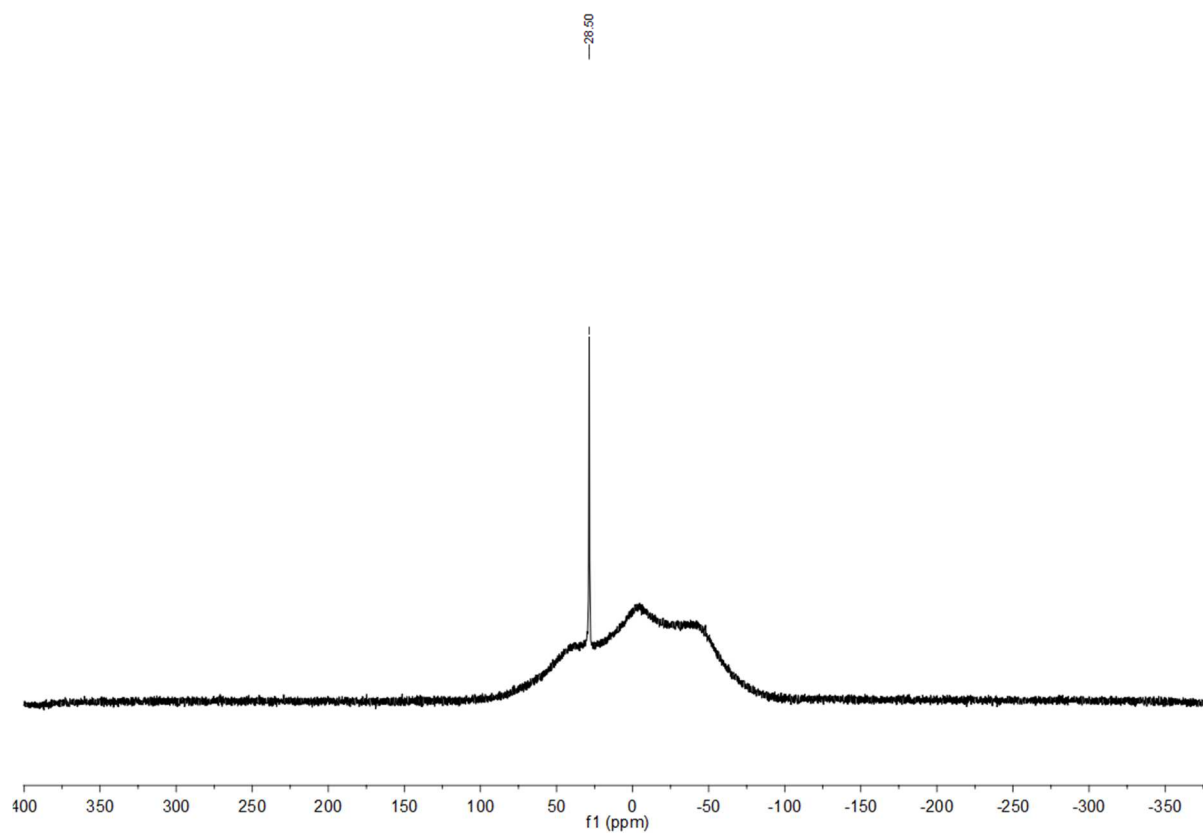

**Figure S26.** Crude  $^{11}\text{B}$  NMR spectrum of C and HBP in showing no reaction in  $\text{C}_6\text{D}_6$  at room temperature.

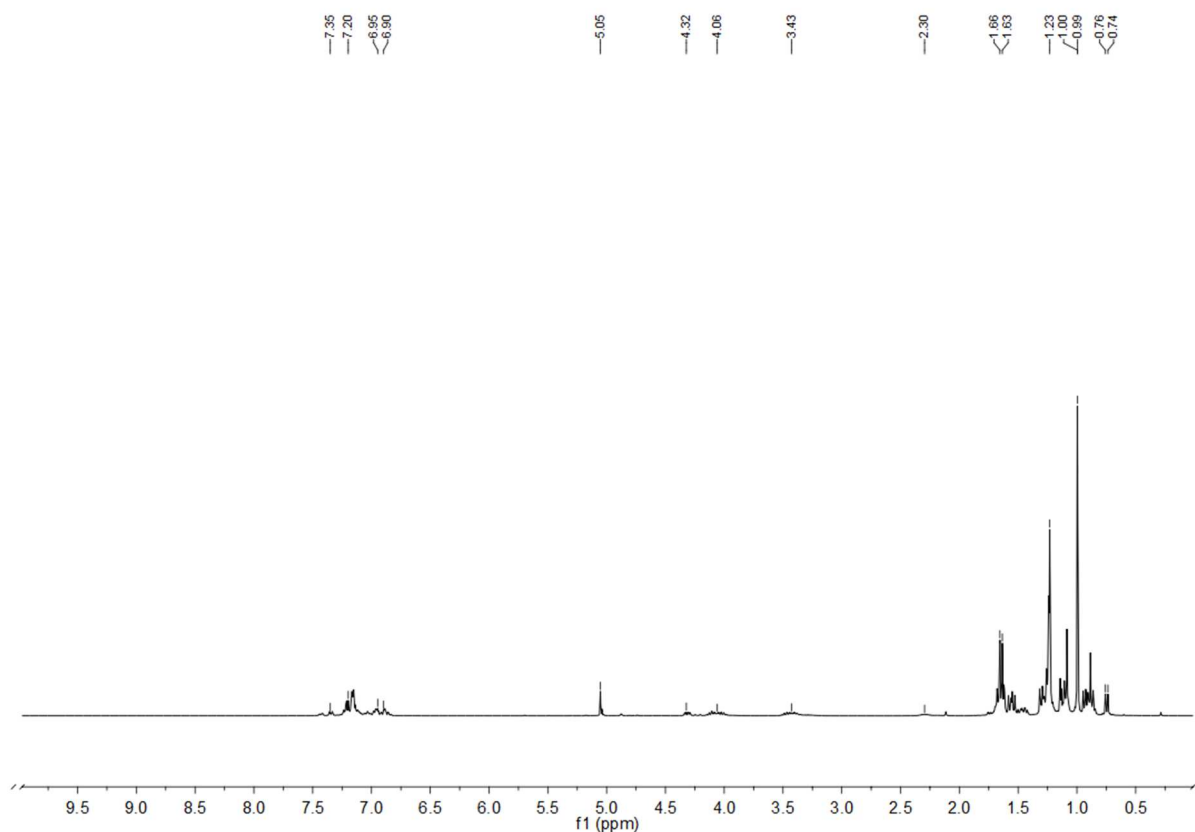

**Figure S27.** Crude  $^1\text{H}$  NMR spectrum of **2** and HBP in showing no reaction in  $\text{C}_6\text{D}_6$  at room temperature.

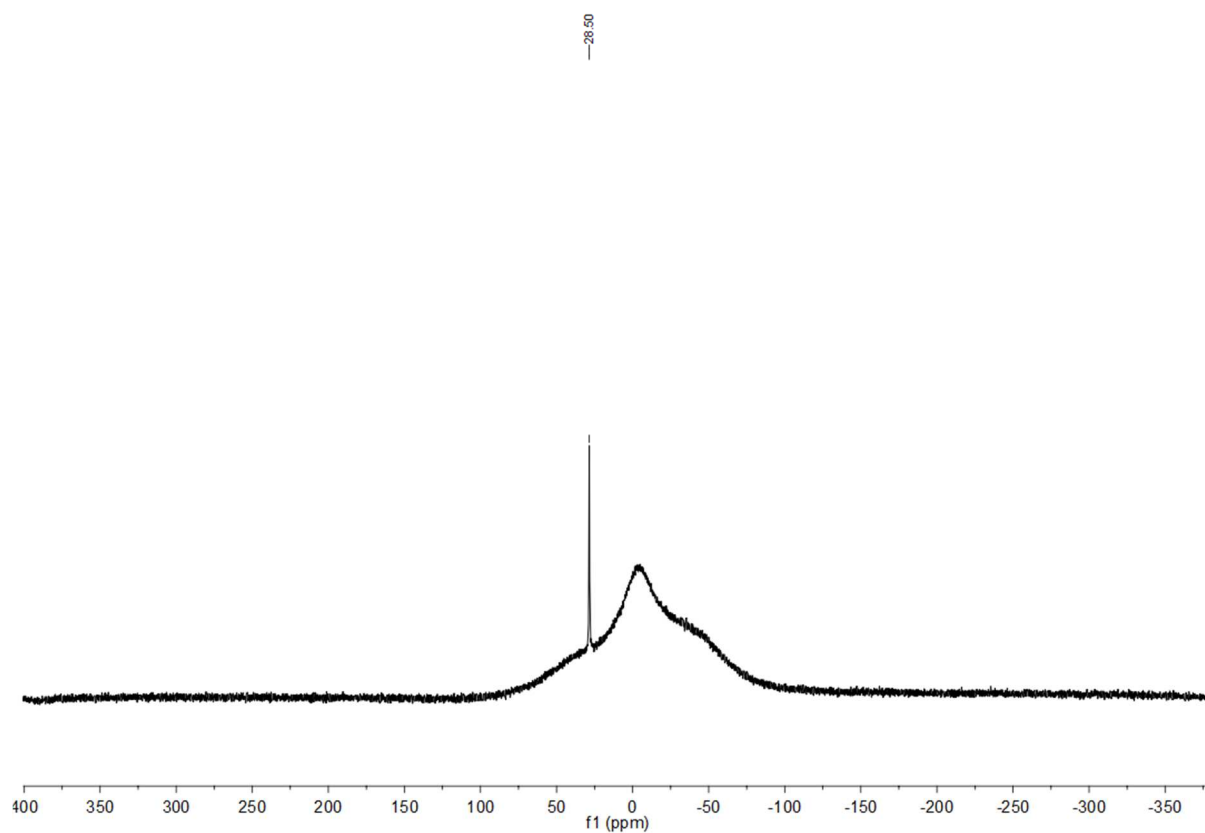

**Figure S28.** Crude  $^{11}\text{B}$  NMR spectrum of **2** and HBP in showing no reaction in  $\text{C}_6\text{D}_6$  at room temperature.



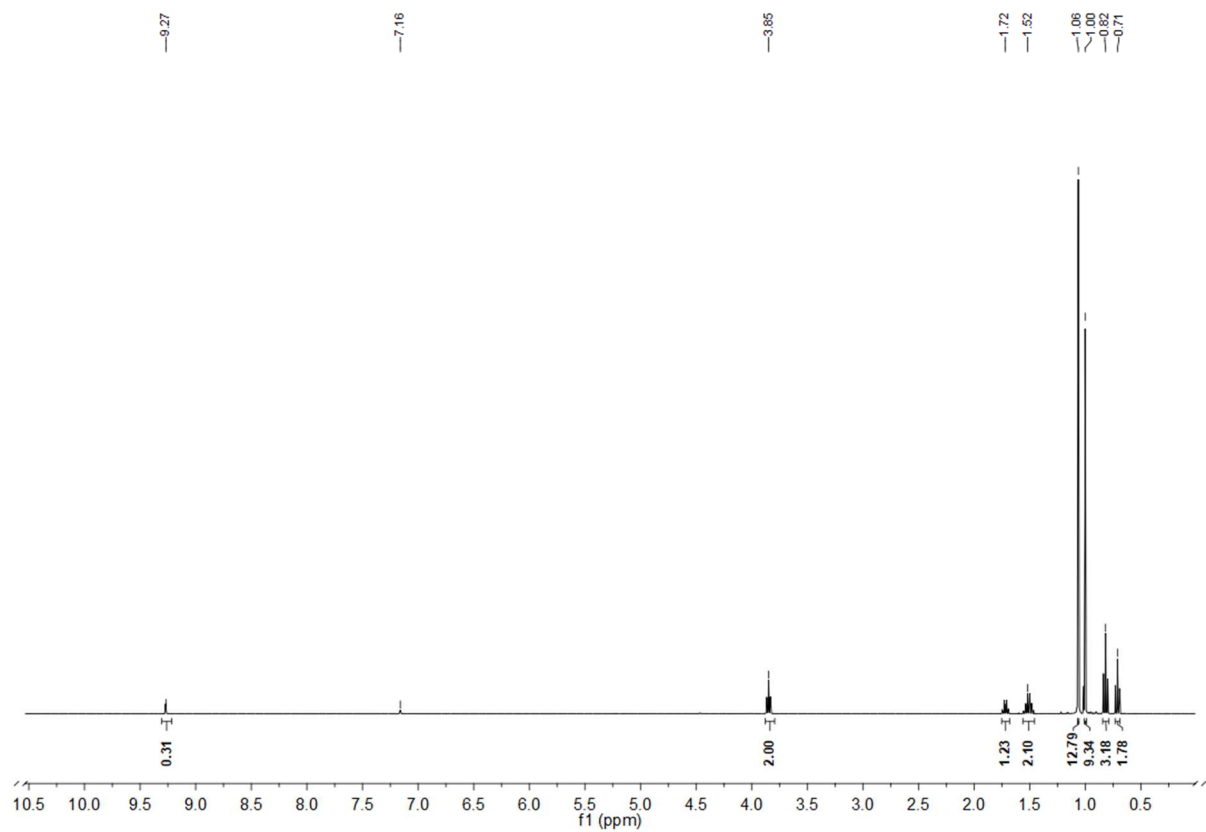

**Figure S29.** Crude <sup>1</sup>H NMR spectrum of the reaction (*n*-propanal and HBPIn) without any catalyst in C<sub>6</sub>D<sub>6</sub> at room temperature after 48 h.

## II. Catalytic Studies

**Table S1.** Catalytic table for hydroboration of aldehyde and ketone derivatives using HBPIn and 1 mol% of **2**.

| Entry | Substrate                                                                           | Product                                                                             | t(h) | Yield (%) | TOF (h <sup>-1</sup> ) |
|-------|-------------------------------------------------------------------------------------|-------------------------------------------------------------------------------------|------|-----------|------------------------|
| 1     |    |    | 0.75 | >99       | 133                    |
| 2     |    |    | 2.25 | >99       | 44                     |
| 3     |    |    | 0.67 | >99       | 150                    |
| 4     |    |    | 1.5  | >99       | 66                     |
| 5     |    |    | 3.5  | >99       | 29                     |
| 6     |    |    | 9    | >99       | 11.1                   |
| 7     |   |   | 24   | 95        | 3.9                    |
| 8     |  |  | 16   | >99       | 6.25                   |
| 9     |  |  | 18   | >99       | 5.6                    |
| 10    |  |  | 168  | 79        | 0.47                   |
| 11    |  |  | 168  | 55        | 0.33                   |
| 12    |  |  | 168  | 67        | 0.40                   |

## Characterization of products

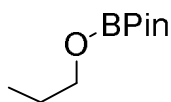

$^1\text{H NMR}$  (400 MHz,  $\text{C}_6\text{D}_6$ ):  $\delta$  3.84 (t,  $^3J_{\text{HH}} = 6.6$  Hz, 2H), 1.61 – 1.36 (m, 2H), 1.06 (s, 12H), 0.82 (t,  $^3J_{\text{HH}} = 7.4$  Hz, 3H).

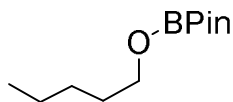

$^1\text{H NMR}$  (300 MHz,  $\text{C}_6\text{D}_6$ ):  $\delta$  3.92 (t,  $^3J_{\text{HH}} = 6.5$  Hz, 2H), 1.53 (m, 2H), 1.23 (m, 4H), 1.07 (s, 12H), 0.80 (t,  $^3J_{\text{HH}} = 6.7$  Hz, 3H).

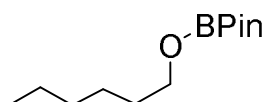

$^1\text{H NMR}$  (300 MHz,  $\text{C}_6\text{D}_6$ ):  $\delta$  3.93 (t,  $^3J_{\text{HH}} = 6.5$  Hz, 2H), 1.64 – 1.46 (m, 2H), 1.28 – 1.13 (m, 6H), 1.07 (s, 12H), 0.82 (t,  $^3J_{\text{HH}} = 6.7$  Hz, 3H).

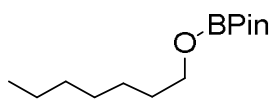

$^1\text{H NMR}$  (300 MHz,  $\text{C}_6\text{D}_6$ ):  $\delta$  3.94 (t,  $^3J_{\text{HH}} = 6.5$  Hz, 2H), 1.65 – 1.43 (m, 2H), 1.20 – 1.16 (m, 8H), 1.08 (s, 12H), 0.85 (t,  $^3J_{\text{HH}} = 6.7$  Hz, 3H).

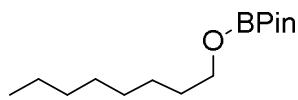

$^1\text{H NMR}$  (300 MHz,  $\text{C}_6\text{D}_6$ ):  $\delta$  3.94 (t,  $^3J_{\text{HH}} = 6.5$  Hz, 2H), 1.67 – 1.47 (m, 2H), 1.31 – 1.13 (m, 8H), 1.08 (s, 12H), 0.87 (t,  $^3J_{\text{HH}} = 6.8$  Hz, 3H).

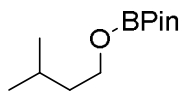

$^1\text{H NMR}$  (300 MHz,  $\text{C}_6\text{D}_6$ ):  $\delta$  3.97 (t,  $^3J_{\text{HH}} = 6.6$  Hz, 2H), 1.76 – 1.61 (m, 1H), 1.44 (q,  $^3J_{\text{HH}} = 6.7$  Hz, 2H), 1.07 (s, 12H), 0.82 (d,  $^3J_{\text{HH}} = 6.6$  Hz, 6H).

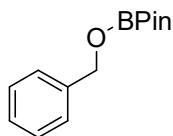

$^1\text{H NMR}$  (300 MHz,  $\text{C}_6\text{D}_6$ ):  $\delta$  7.60 – 6.76 (m, 5H), 4.95 (s, 2H), 1.04 (s, 12H).

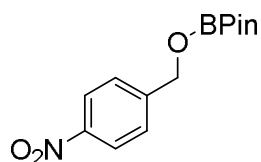

$^1\text{H NMR}$  (300 MHz,  $\text{C}_6\text{D}_6$ ):  $\delta$  7.80 (d,  $^3J_{\text{HH}} = 8.7$  Hz, 2H), 6.92 (d,  $^3J_{\text{HH}} = 8.5$  Hz, 2H), 4.69 (s, 2H), 1.05 (s, 12H).

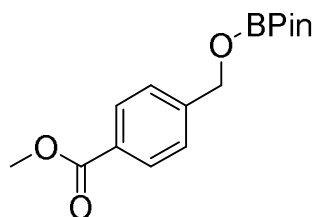

$^1\text{H NMR}$  (300 MHz,  $\text{C}_6\text{D}_6$ )  $\delta$  8.06 (d,  $^3J_{\text{HH}} = 8.2$  Hz, 2H), 7.22 (d,  $^3J_{\text{HH}} = 8.0$  Hz, 2H), 4.85 (s, 2H), 3.49 (s, 3H), 1.04 (s, 12H).

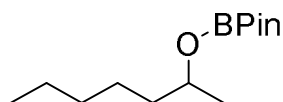

$^1\text{H NMR}$  (300 MHz,  $\text{C}_6\text{D}_6$ ):  $\delta$  4.35 – 4.31 (m, 1H), 1.47 – 1.35 (m, 6H), 1.20 (d,  $^3J_{\text{HH}} = 6.2$  Hz, 3H), 1.15 – 1.13 (m, 2H), 1.08 (s, 12H), 0.85 (t,  $^3J_{\text{HH}} = 7.1$  Hz, 3H).

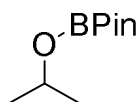

$^1\text{H NMR}$  (300 MHz,  $\text{C}_6\text{D}_6$ ):  $\delta$  4.61 – 4.26 (m, 1H), 1.16 (d,  $^3J_{\text{HH}} = 6.2$  Hz, 6H), 1.06 (s, 12H).

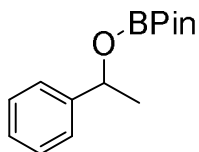

$^1\text{H NMR}$  (300 MHz,  $\text{C}_6\text{D}_6$ ):  $\delta$  7.43 – 7.30 (m, 2H), 7.17 – 7.12 (m, 2H), 7.06 – 7.00 (m, 1H), 5.41 (q,  $^3J_{\text{HH}} = 6.5$  Hz, 1H), 1.45 (d,  $^3J_{\text{HH}} = 6.5$  Hz, 3H), 1.03 (s, 6H), 1.00 (s, 6H).

## Kinetic Studies

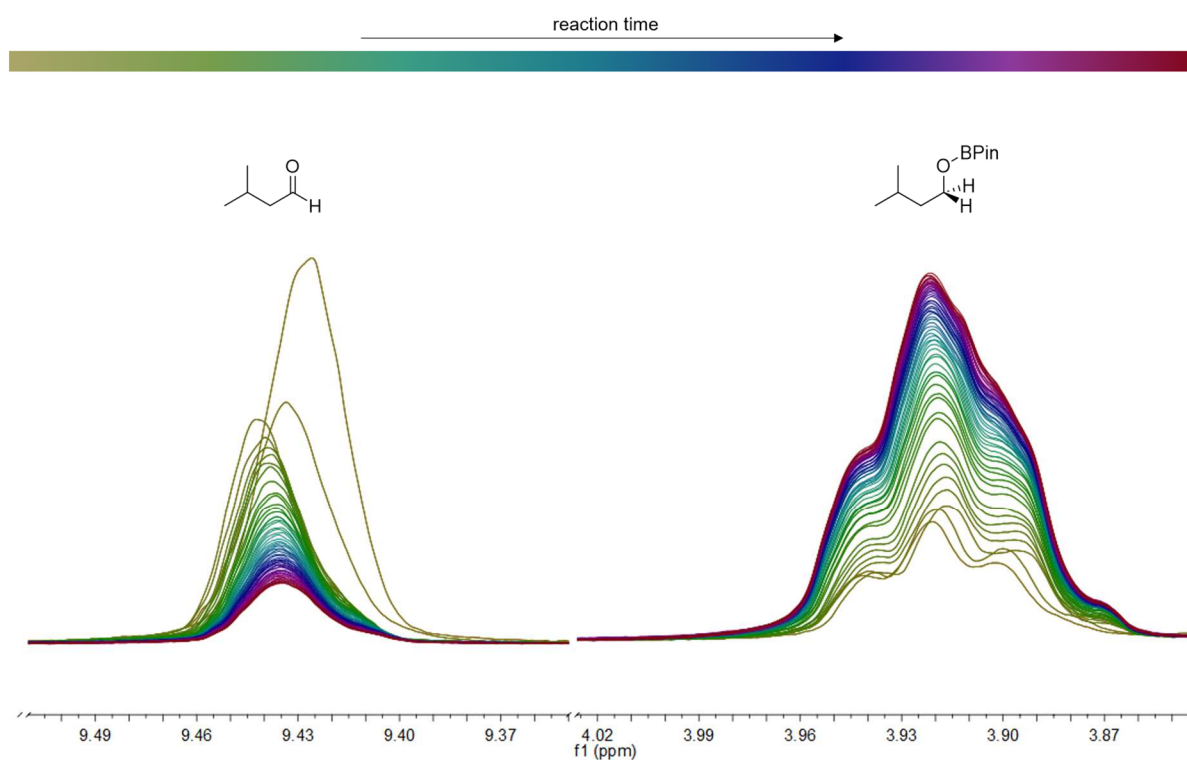

**Figure S30.**  $^1\text{H}$  NMR spectra showing the conversion of *iso*-valeraldehyde in  $\text{C}_6\text{D}_6$  at  $80^\circ\text{C}$ .

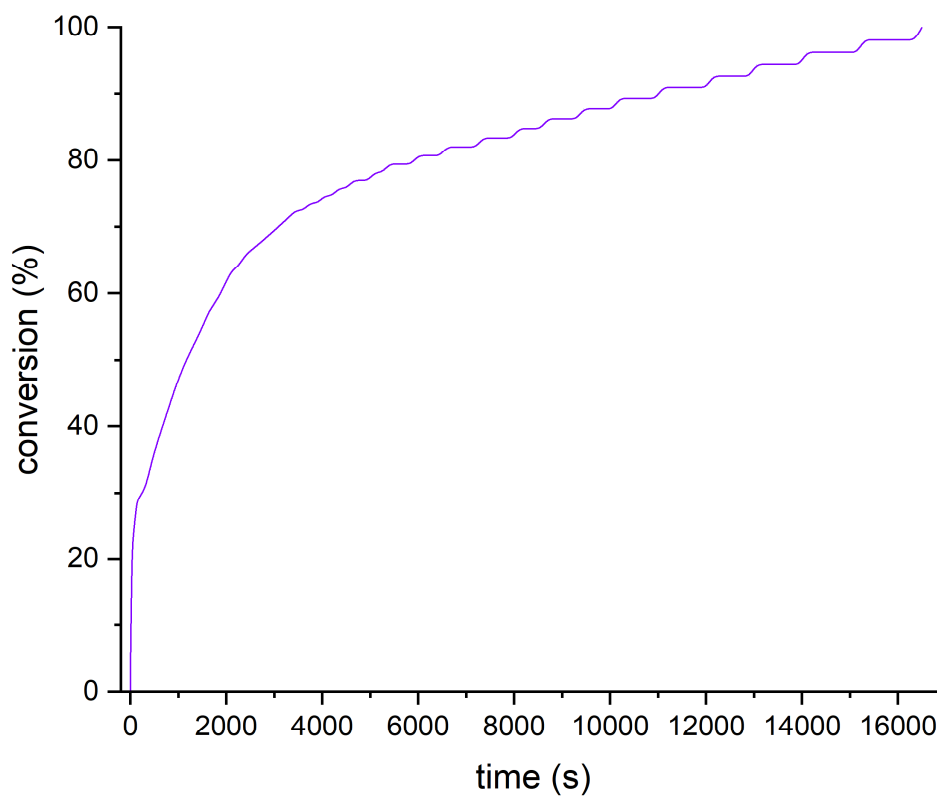

**Figure S31.** Plot of conversion against time during measurement of kinetics.

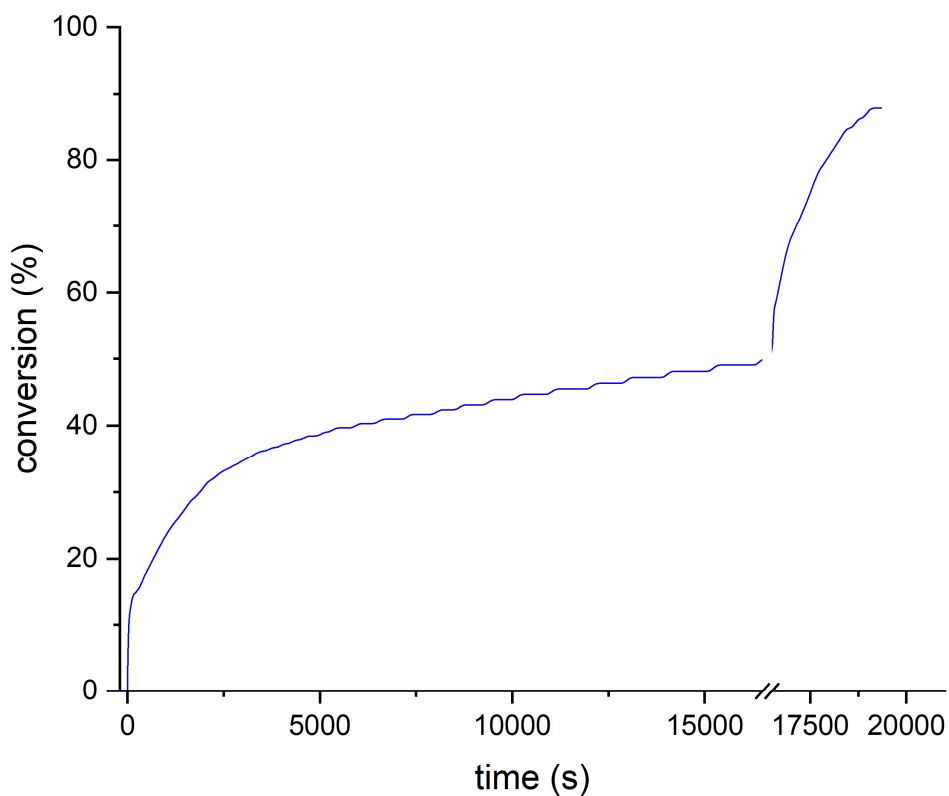

**Figure S32.** Plot of conversion against time during measurement of kinetics with addition of one equivalent *iso*-valeraldehyde and HBPIn after 24 h.

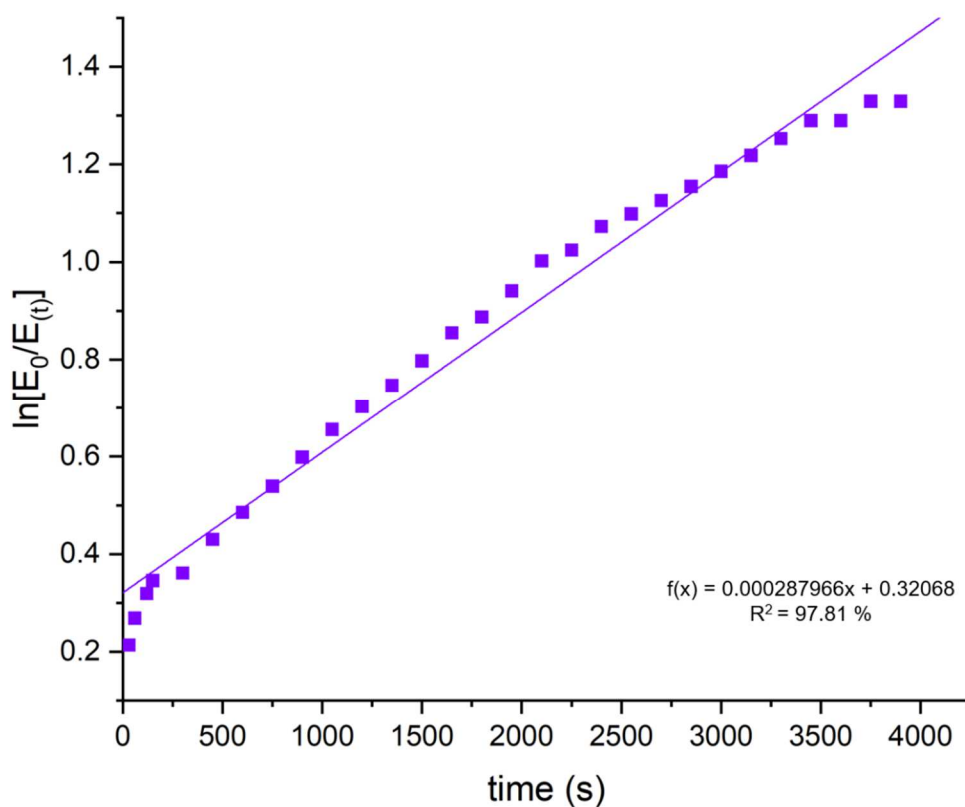

**Figure S33.** Plot of reaction kinetics (one equivalent *iso*-valeraldehyde and HBPIn).

### III. Single Crystal X-ray Diffraction

The crystals were mounted on nylon loops in inert oil. Data of **1** were collected on a Bruker AXS D8 Venture diffractometer with Photon II detector (monochromated  $\text{Cu}_{K\alpha}$  radiation,  $\lambda = 1.54178 \text{ \AA}$ , microfocus source) at 100(2) K while those of **2** were collected on a Bruker AXS D8 Kappa diffractometer with APEX2 detector (monochromated  $\text{Mo}_{K\alpha}$  radiation,  $\lambda = 0.71073 \text{ \AA}$ ) at 100(2) K. The structures were solved by Direct Methods (SHELXS-2013)<sup>1</sup> and refined anisotropically by full-matrix least-squares on  $F^2$  (SHELXL-2017).<sup>2,3</sup> Absorption corrections were performed semi-empirically from equivalent reflections on basis of multi-scans (Bruker AXS APEX3). Hydrogen atoms were refined using a riding model or rigid methyl groups.

**Table S2.** Crystal data and structure refinement of **1** and **2**.

| Identification code                                        | <b>1 (Ik_045m)</b>                                   | <b>2 (Ik_046m)</b>                                   |
|------------------------------------------------------------|------------------------------------------------------|------------------------------------------------------|
| Empirical formula                                          | $\text{C}_{58}\text{H}_{83}\text{ClGaN}_4\text{OSi}$ | $\text{C}_{55}\text{H}_{88}\text{ClGaN}_4\text{OSi}$ |
| $M$                                                        | 985.54                                               | 954.55                                               |
| Crystal size [mm]                                          | $0.174 \times 0.161 \times 0.077$                    | $0.300 \times 0.234 \times 0.056$                    |
| $T$ [K]                                                    | 100(2)                                               | 100(2)                                               |
| Crystal system                                             | triclinic                                            | triclinic                                            |
| Space group                                                | $P-1$                                                | $P-1$                                                |
| $a$ [Å]                                                    | 12.8260(8)                                           | 12.6656(7)                                           |
| $b$ [Å]                                                    | 13.0023(8)                                           | 13.0233(7)                                           |
| $c$ [Å]                                                    | 18.3120(10)                                          | 18.9626(11)                                          |
| $\alpha$ [°]                                               | 83.087(2)                                            | 101.433(3)                                           |
| $\beta$ [°]                                                | 75.811(2)                                            | 102.306(3)                                           |
| $\gamma$ [°]                                               | 69.828(2)                                            | 111.151(2)                                           |
| $V$ [Å <sup>3</sup> ]                                      | 2776.9(3)                                            | 2717.1(3)                                            |
| $Z$                                                        | 2                                                    | 2                                                    |
| $D_{\text{calc}}$ [g·cm <sup>-3</sup> ]                    | 1.179                                                | 1.167                                                |
| $\mu(K_{\alpha})$ [mm <sup>-1</sup> ]                      | 1.632 (Cu)                                           | 0.617 (Mo)                                           |
| Transmissions                                              | 0.75/0.64                                            | 0.75/0.67                                            |
| $F(000)$                                                   | 1058                                                 | 1032                                                 |
| Index ranges                                               | $-16 \leq h \leq 16$                                 | $-19 \leq h \leq 19$                                 |
|                                                            | $-16 \leq k \leq 16$                                 | $-20 \leq k \leq 20$                                 |
|                                                            | $-23 \leq l \leq 20$                                 | $-29 \leq l \leq 29$                                 |
| $\theta_{\text{max}}$ [°]                                  | 80.466                                               | 33.267                                               |
| Reflections collected                                      | 128716                                               | 229049                                               |
| Independent reflections                                    | 12043                                                | 20905                                                |
| $R_{\text{int}}$                                           | 0.0580                                               | 0.0495                                               |
| Refined parameters                                         | 839                                                  | 645                                                  |
| $R_1$ [ $I > 2\sigma(I)$ ]                                 | 0.0393                                               | 0.0329                                               |
| $wR_2$ [all data]                                          | 0.1094                                               | 0.0880                                               |
| GooF                                                       | 1.054                                                | 1.043                                                |
| $\Delta\rho_{\text{final}}$ (max/min) [e·Å <sup>-3</sup> ] | 0.975/-0.599                                         | 0.735/-0.603                                         |

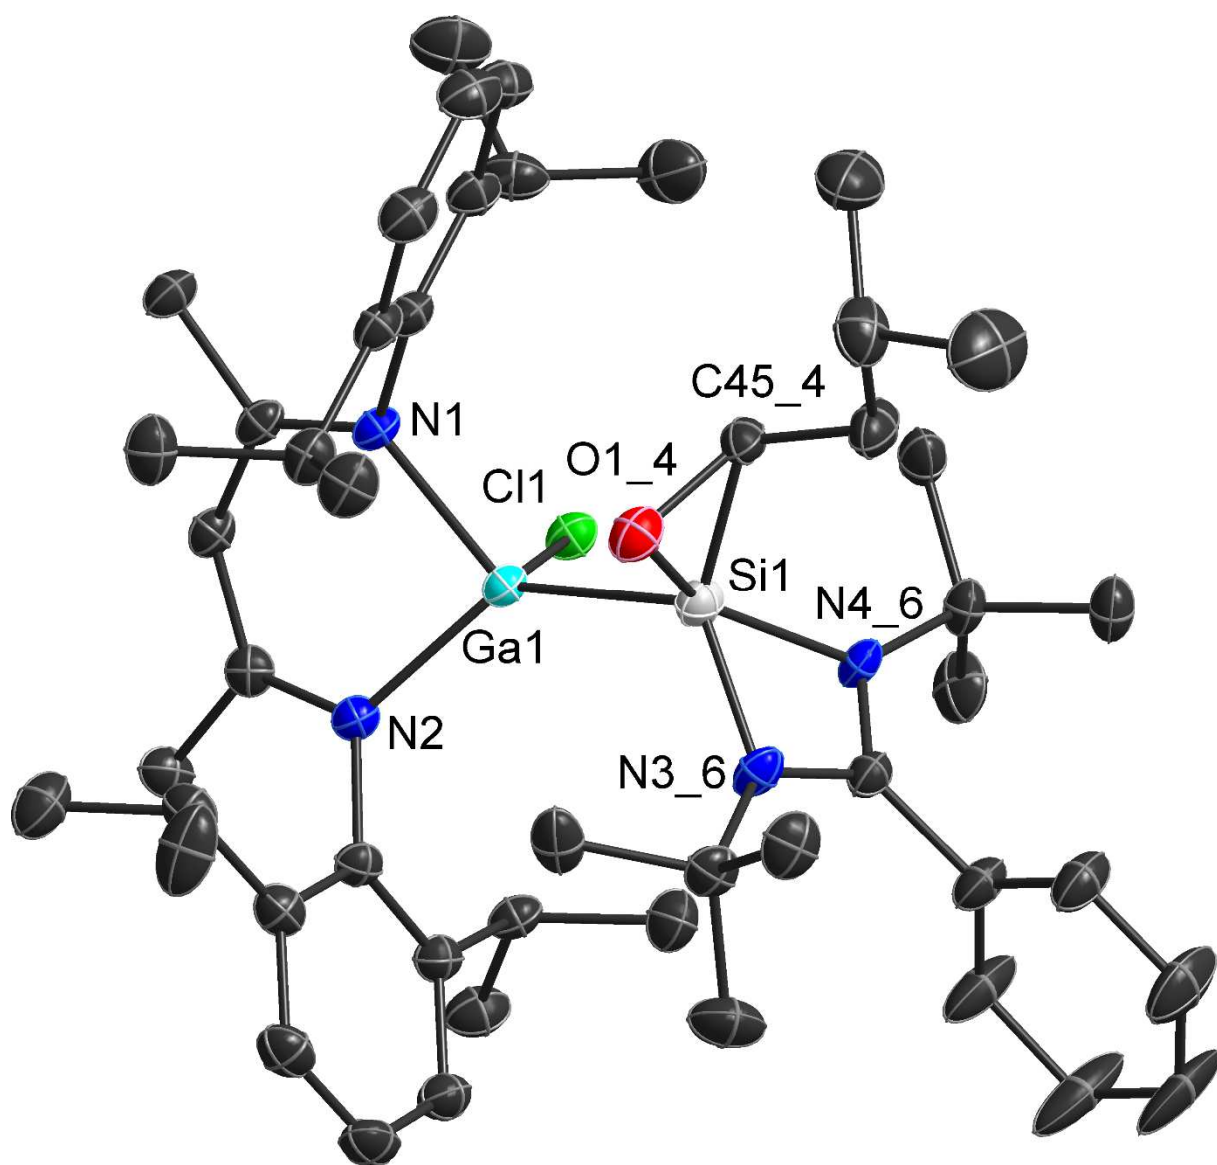

**Figure S34.** Molecular structure of **1** with thermal ellipsoids at 50% probability level. The hydrogen atoms, solvent molecules and the alternate position of the disordered parts are omitted for clarity. Selected bond length (Å) and angles (°): Ga(1)-N(2) 1.9614(14), Ga(1)-N(1) 1.9823(13), Ga(1)-Cl(1) 2.2845(4), Ga(1)-Si(1) 2.4054(5), Si(1)-C45\_5 1.654(18), Si(1)-O1\_5 1.730(8), Si(1)-O1\_4 1.7488(16), Si(1)-N3\_6 1.818(7), Si(1)-C45\_4 1.835(3), Si(1)-N4\_6 1.939(4), Si(1)-N3\_7 1.94(3), Si(1)-N4\_7 2.069(16), Si(1)-C30\_6 2.340(4), N(2)-Ga(1)-N(1) 94.20(6), N(2)-Ga(1)-Cl(1) 99.43(4), N(1)-Ga(1)-Cl(1) 99.71(4), N(2)-Ga(1)-Si(1) 130.11(4), N(1)-Ga(1)-Si(1) 115.99(4), Cl(1)-Ga(1)-Si(1) 112.242(18), C45\_5-Si(1)-O1\_5 53.7(5), O1\_4-Si(1)-N3\_6 100.4(2), O1\_4-Si(1)-C45\_4 49.52(11), N3\_6-Si(1)-C45\_4 122.9(4), O1\_4-Si(1)-N4\_6 147.19(19), N3\_6-Si(1)-N4\_6 69.17(18), C45\_4-Si(1)-N4\_6 108.9(2), C45\_5-Si(1)-N3\_7 111.0(14), O1\_5-Si(1)-N3\_7 142.8(12), C45\_5-Si(1)-N4\_7 118.5(10), O1\_5-Si(1)-N4\_7 92.1(6), N3\_7-Si(1)-N4\_7 64.3(7), O1\_4-Si(1)-C30\_6 127.26(16), N3\_6-Si(1)-C30\_6 35.16(16), C45\_4-Si(1)-C30\_6 119.64(18), N4\_6-Si(1)-C30\_6 34.12(11), C45\_5-Si(1)-Ga(1) 121.2(7), O1\_5-Si(1)-Ga(1) 100.0(3), O1\_4-Si(1)-Ga(1) 103.62(6), N3\_6-Si(1)-Ga(1) 119.9(3), C45\_4-Si(1)-Ga(1) 114.48(9), N4\_6-Si(1)-Ga(1) 108.51(17), N3\_7-Si(1)-Ga(1) 115.4(13), N4\_7-Si(1)-Ga(1) 113.1(7), C30\_6-Si(1)-Ga(1) 121.66(16).



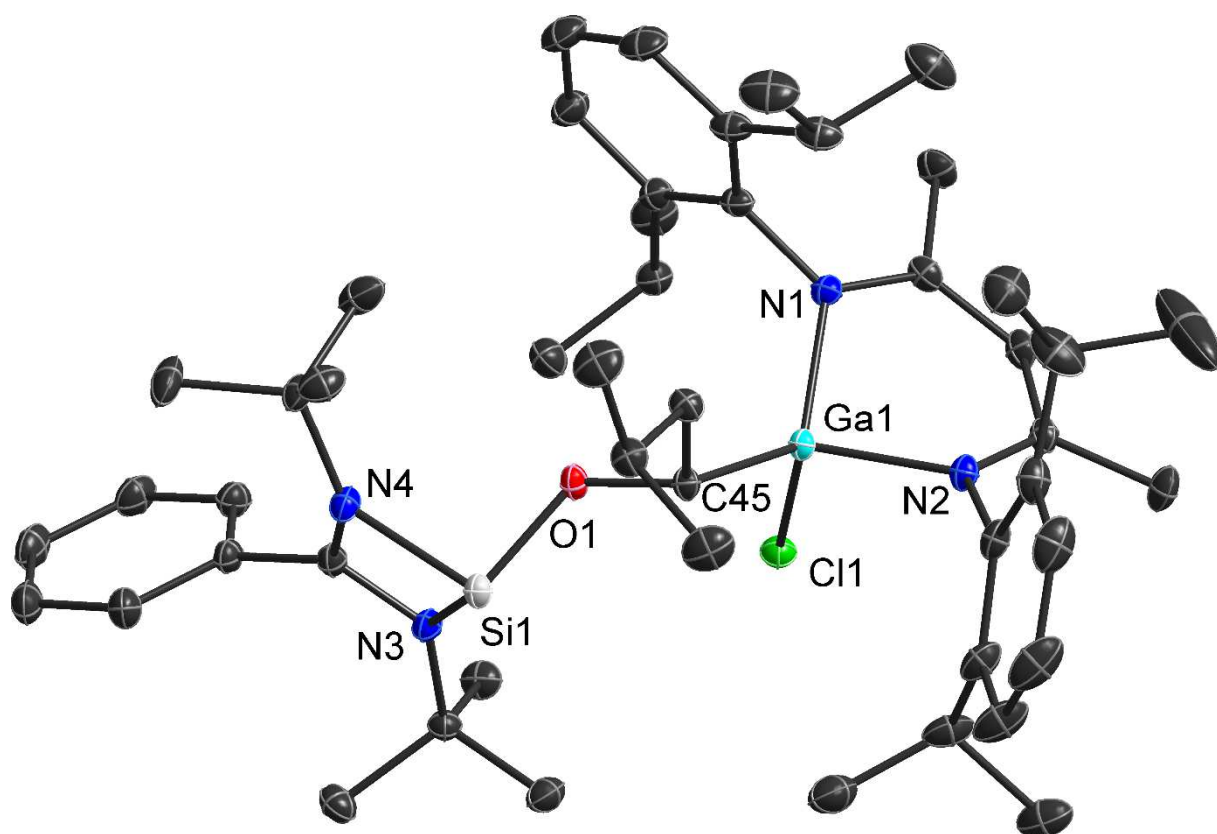

**Figure S35.** Molecular structure of **2** with thermal ellipsoids at 50% probability level. The hydrogen atoms and the disordered solvent molecule are omitted for clarity. Selected bond length (Å) and angles (°): Ga(1)-N(1) 1.9444(9), Ga(1)-N(2) 1.9500(9), Ga(1)-C(45) 1.9662(10), Ga(1)-Cl(1) 2.2347(3), Si(1)-O(1) 1.6849(8), Si(1)-N(4) 1.8748(9), Si(1)-N(3) 1.9203(9), Si(1)-C(30) 2.3467(11), O(1)-C(45) 1.4390(12), N(1)-Ga(1)-N(2) 96.05(4), N(1)-Ga(1)-C(45) 124.42(4), N(2)-Ga(1)-C(45) 116.18(4), N(1)-Ga(1)-Cl(1) 102.48(3), N(2)-Ga(1)-Cl(1) 103.15(3), C(45)-Ga(1)-Cl(1) 111.56(3), O(1)-Si(1)-N(4) 96.60(4), O(1)-Si(1)-N(3) 103.59(4), N(4)-Si(1)-N(3) 69.06(4), O(1)-Si(1)-C(30) 105.76(4), N(4)-Si(1)-C(30) 34.66(4), N(3)-Si(1)-C(30) 34.72(4), C(45)-O(1)-Si(1) 121.71(6).

#### IV. Computational Details

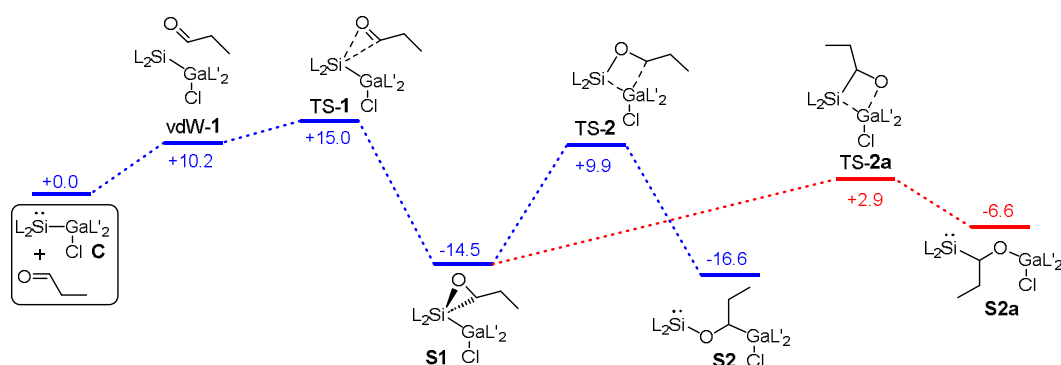

**Figure S36.** Gibbs energies (G) for the formation of the catalyst **S2** starting from **C** and propanal calculated by means of PBE0-D3BJ(SMD,benzene as solvent)/def2-TZVP//PBE0-D3BJ/def2-SVP. The values are given in kcal/mol. Half-life for **C** at -80 °C: 4.5 h. Half-life for **S1** at RT: 23.8 h.

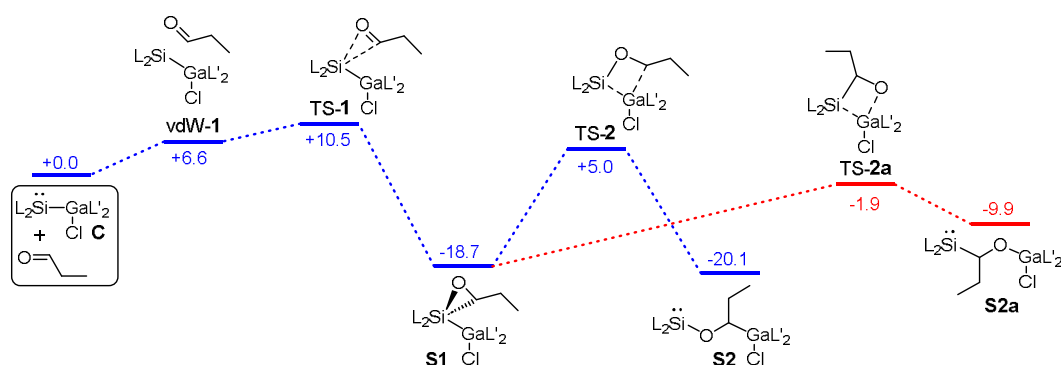

**Figure S37.** Gibbs energies ( $G_{70\%}$ ) for the formation of the catalyst **S2** starting from **C** and propanal calculated by means of PBE0-D3BJ(SMD,benzene as solvent)/def2-TZVP//PBE0-D3BJ/def2-SVP. Herein  $G_{70\%}$  means that 70% calculated gas-phase entropy contributes to solution-phase free energy. The values are given in kcal/mol. Half-life for **C** at -80 °C: 0.13 s. Half-life for **S1** at RT: 7.3 h.

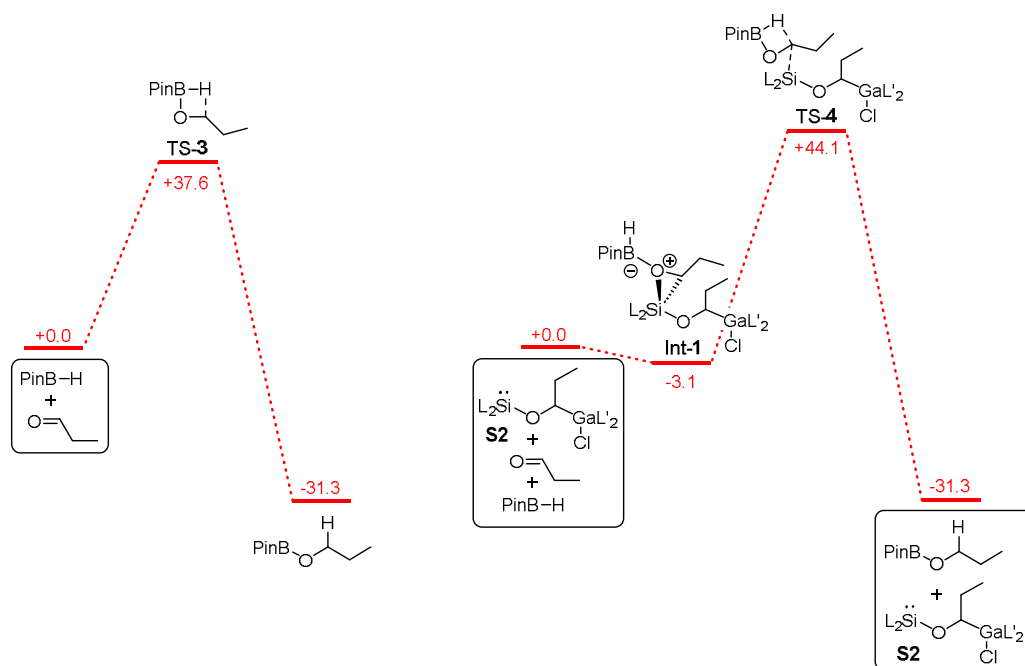

**Figure S38.** Gibbs energies (G) for the hydroboration of propanal without (left) and with S2 as catalyst (right) calculated by means of PBE0-D3BJ(SMD,benzene as solvent)/def2-TZVP//PBE0-D3BJ/def2-SVP. The values are given in kcal/mol.

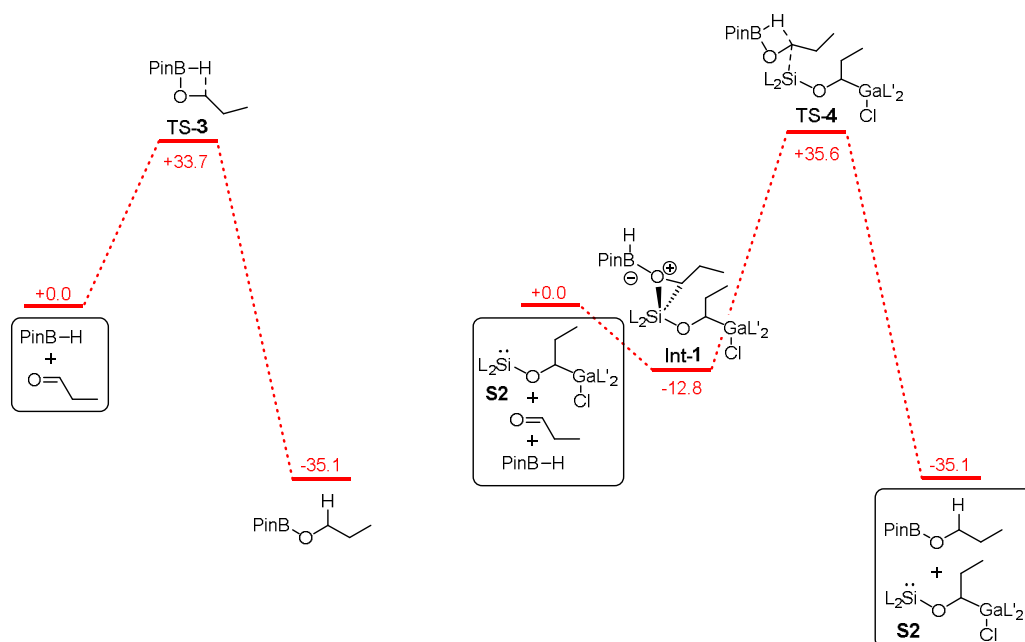

**Figure S39.** Gibbs energies ( $G_{70\%}$ ) for the hydroboration of propanal without (left) and with S2 as catalyst (right) calculated by means of PBE0-D3BJ(SMD,benzene as solvent)/def2-TZVP//PBE0-D3BJ/def2-SVP. Herein  $G_{70\%}$  means that 70% calculated gas-phase entropy contributes to solution-phase free energy. The values are given in kcal/mol.

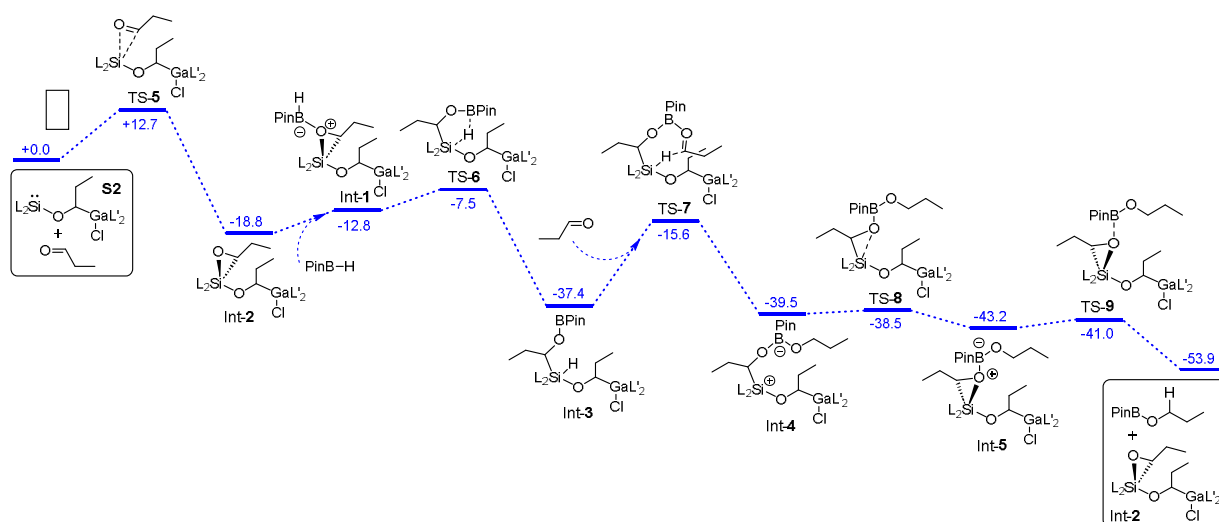

**Figure S40.** Gibbs energies ( $G_{70\%}$ ) for the hydroboration of propanal with **Int-2** as catalytically active species calculated by means of PBE0-D3BJ(SMD,benzene as solvent)/def2-TZVP//PBE0-D3BJ/def2-SVP. Herein  $G_{70\%}$  means that 70% calculated gas-phase entropy contributes to solution-phase free energy. The values are given in kcal/mol. The turnover frequencies (TOF) of the catalytic reaction was estimated to be  $0.9 \text{ h}^{-1}$ .

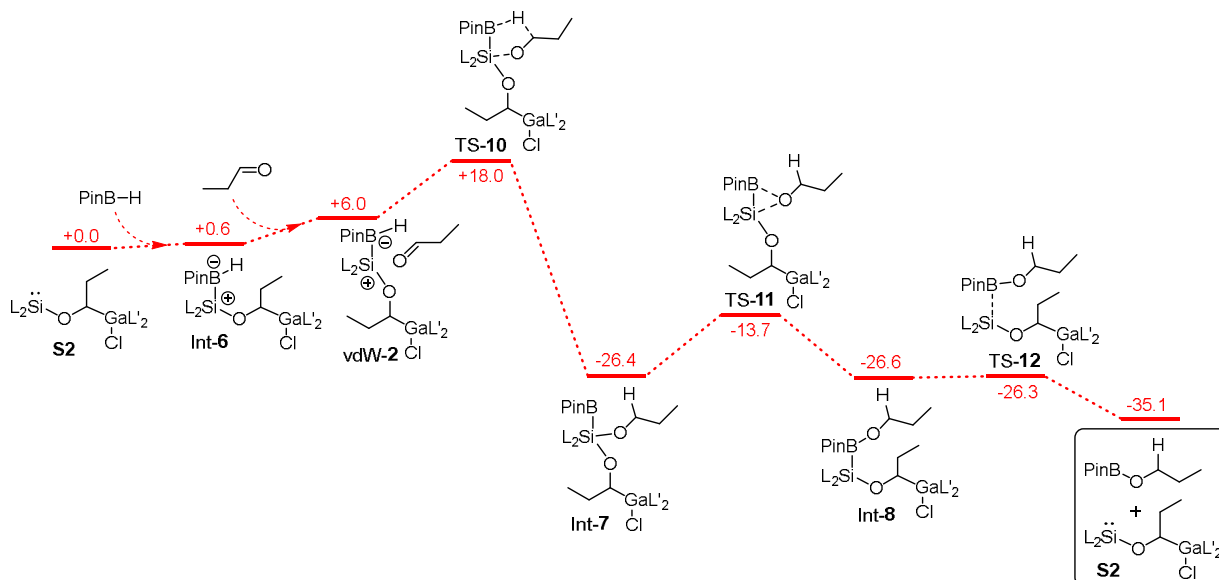

**Figure S41.** Gibbs energies ( $G_{70\%}$ ) for the hydroboration of propanal with **S2** as catalytically active species calculated by means of PBE0-D3BJ(SMD,benzene as solvent)/def2-TZVP//PBE0-D3BJ/def2-SVP. Herein  $G_{70\%}$  means that 70% calculated gas-phase entropy contributes to solution-phase free energy. The values are given in kcal/mol. The turnover frequencies (TOF) of the catalytic reaction was estimated to be  $217 \text{ h}^{-1}$ .

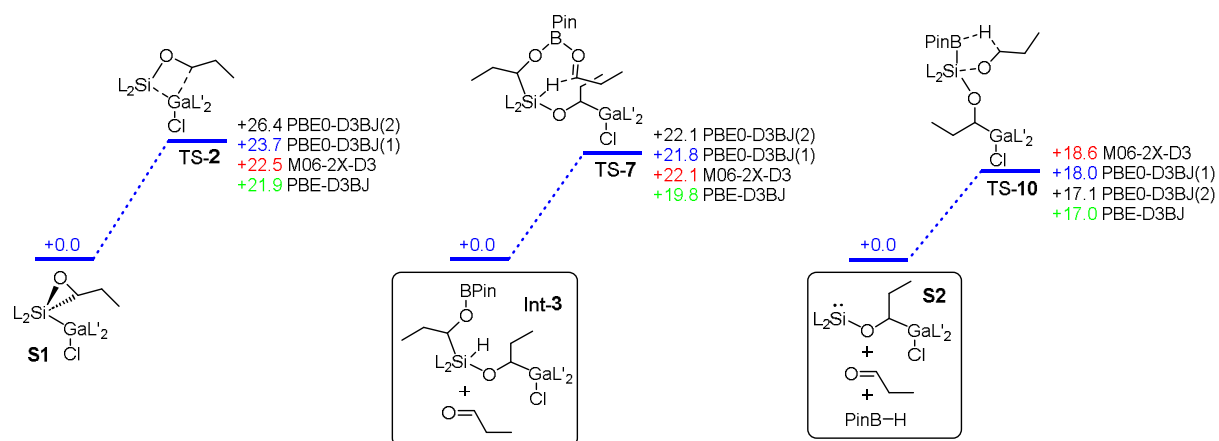

**Figure S42.** Gibbs energies ( $G_{70\%}$ ) for the formation of the transition states TS-2, TS-7 and TS-10 using different methods. PBE0-D3BJ(1): PBE0-D3BJ(SMD,benzene as solvent)/def2-TZVP//PBE0-D3BJ/def2-SVP. PBE0-D3BJ(2): PBE0-D3BJ(SMD,benzene as solvent)/6-311++G\*\*//PBE0-D3BJ/6-31G\*. PBE-D3BJ: PBE-D3BJ(SMD,benzene as solvent)/def2-TZVP//PBE-D3BJ/def2-SVP. M06-2X-D3: M06-2X-D3(SMD,benzene as solvent)/def2-TZVP//M06-2X-D3/def2-SVP. Herein  $G_{70\%}$  means that 70% calculated gas-phase entropy contributes to solution-phase free energy. The values are given in kcal/mol.

## VI. Absolute Energies and Cartesian Coordinates for the Calculated Compounds

**Table S3.** Absolute energies [au] and entropies [cal/mol\*K] calculated by means of different methods.

| Compound                | $E^a$        | $G^a$        | $S^a$   | $E^b$        |
|-------------------------|--------------|--------------|---------|--------------|
| EtCHO                   | -192.778690  | -192.721753  | 70.861  | -193.001451  |
| HBPIn                   | -411.105949  | -410.948011  | 91.247  | -411.561149  |
| TS-3                    | -603.852407  | -603.616179  | 118.547 | -604.524119  |
| EtCH <sub>2</sub> OBPIn | -603.971179  | -603.729839  | 119.732 | -604.638998  |
| <b>C</b>                | -4604.456878 | -4603.547267 | 311.816 | -4606.992265 |
| vdW-1                   | -4797.248939 | -4796.260787 | 342.621 | -4799.999132 |
| TS-1                    | -4797.244634 | -4796.252872 | 332.826 | -4799.995088 |
| <b>S1</b>               | -4797.287210 | -4796.295144 | 335.018 | -4800.042288 |
| TS-2                    | -4797.249612 | -4796.254945 | 327.595 | -4800.006015 |
| <b>S2</b>               | -4797.286449 | -4796.298766 | 342.711 | -4800.041229 |
| TS-2a                   | -4797.265978 | -4796.271915 | 328.514 | -4800.016603 |
| <b>S2a</b>              | -4797.272827 | -4796.286397 | 345.367 | -4800.024117 |
| Int-1                   | -5401.250230 | -5399.989266 | 395.993 | -5404.667150 |
| TS-4                    | -5401.168024 | -5399.918317 | 410.569 | -5404.580783 |
| TS-5                    | -4990.070519 | -4989.000520 | 363.883 | -4993.040722 |
| Int-2                   | -4990.119669 | -4989.045719 | 360.366 | -4993.094326 |
| Int-1                   | -5401.250230 | -5399.989266 | 395.993 | -5404.667150 |
| TS-6                    | -5401.237735 | -5399.979413 | 398.508 | -5404.656359 |
| Int-3                   | -5401.290720 | -5400.033527 | 404.532 | -5404.703831 |
| TS-7                    | -5594.066780 | -5592.726567 | 420.522 | -5597.688790 |
| Int-4                   | -5594.109317 | -5592.766974 | 426.164 | -5597.729813 |
| TS-8                    | -5594.106712 | -5592.765084 | 424.968 | -5597.727335 |
| Int-5                   | -5594.115290 | -5592.771475 | 423.238 | -5597.736653 |
| TS-9                    | -5594.107205 | -5592.764653 | 424.327 | -5597.732014 |
| Int-6                   | -5208.415676 | -5207.247691 | 389.840 | -5211.617456 |
| vdW-2                   | -5401.217749 | -5399.969237 | 417.067 | -5404.627760 |
| TS-10                   | -5401.205290 | -5399.950093 | 400.653 | -5404.612893 |
| Int-7                   | -5401.273700 | -5400.015291 | 406.107 | -5404.687659 |
| TS-11                   | -5401.256097 | -5399.998541 | 402.854 | -5404.666096 |
| Int-8                   | -5401.276990 | -5400.021508 | 410.258 | -5404.685587 |
| TS-12                   | -5401.275212 | -5400.019628 | 408.351 | -5404.685032 |

<sup>a</sup> PBE0-D3BJ/def2-SVP.

<sup>b</sup> PBE0-D3BJ (benzene as solvent)/def2-TZVP//PBE0-D3BJ/def2-SVP

**Table S4.** Absolute energies [au] and entropies [cal/mol\*K] calculated by means of different methods.

| Compound  | $E^a$        | $G^a$        | $S^a$   | $E^b$        |
|-----------|--------------|--------------|---------|--------------|
| <b>S1</b> | -4799.146483 | -4798.151451 | 329.558 | -4802.032553 |
| TS-2      | -4799.111755 | -4798.112988 | 320.295 | -4801.999197 |
| <b>S2</b> | -4799.152481 | -4798.158831 | 331.254 | -4802.037580 |
| EtCHO     | -192.899670  | -192.842530  | 70.967  | -193.132904  |
| HBPIn     | -411.378295  | -411.219720  | 90.855  | -411.856647  |
| Int-3     | -5403.550756 | -5402.287631 | 393.647 | -5407.130473 |
| TS-7      | -5596.446609 | -5595.101878 | 412.872 | -5600.245183 |
| TS-10     | -5403.454490 | -5402.195437 | 393.283 | -5407.032948 |

<sup>a</sup> M06-2X-D3/def2-SVP.

<sup>b</sup> M06-2X-D3 (benzene as solvent)/def2-TZVP//M06-2X-D3/def2-SVP

**Table S5.** Absolute energies [au] and entropies [cal/mol\*K] calculated by means of different methods.

| Compound  | $E^a$        | $G^a$        | $S^a$   | $E^b$        |
|-----------|--------------|--------------|---------|--------------|
| <b>S1</b> | -4796.893165 | -4795.939746 | 344.664 | -4799.676775 |
| TS-2      | -4796.859521 | -4795.903334 | 336.543 | -4799.643448 |
| <b>S2</b> | -4796.892733 | -4795.943940 | 352.659 | -4799.675916 |
| EtCHO     | -192.761707  | -192.707778  | 71.213  | -192.987181  |
| HBPIn     | -411.053658  | -410.902369  | 92.524  | -411.513971  |

|       |              |              |         |              |
|-------|--------------|--------------|---------|--------------|
| Int-3 | -5400.818957 | -5399.609518 | 414.273 | -5404.266670 |
| TS-7  | -5593.580436 | -5592.292948 | 434.313 | -5597.239156 |
| TS-10 | -5400.745505 | -5399.539397 | 412.691 | -5404.187246 |

<sup>a</sup> PBE-D3BJ/def2-SVP.

<sup>b</sup> PBE-D3BJ(benzene as solvent)/def2-TZVP//PBE-D3BJ/def2-SVP

**Table S6.** Absolute energies [au] and entropies [cal/mol\*K] calculated by means of different methods.

| Compound  | $E^a$        | $G^a$        | $S^a$   | $E^b$        |
|-----------|--------------|--------------|---------|--------------|
| <b>S1</b> | -4797.300523 | -4796.297623 | 332.883 | -4799.788435 |
| TS-2      | -4797.267442 | -4796.259107 | 320.439 | -4799.750002 |
| <b>S2</b> | -4797.297649 | -4796.297480 | 337.527 | -4799.789521 |
| EtCHO     | -192.918483  | -192.860668  | 70.868  | -192.982215  |
| HBPIn     | -411.403217  | -411.243289  | 91.160  | -411.518100  |
| Int-3     | -5401.735365 | -5400.464376 | 401.773 | -5404.389315 |
| TS-7      | -5594.649671 | -5593.294359 | 417.095 | -5597.354841 |
| TS-10     | -5401.649643 | -5400.379891 | 396.714 | -5404.299852 |

<sup>a</sup> PBE0-D3BJ/6-31G\*.

<sup>b</sup> PBE0-D3BJ(benzene as solvent)/6-311++G\*\*//PBE0-D3BJ/6-31G\*

Cartesian coordinates of the optimized geometry of EtCHO at PBE0-D3BJ/def2-SVP level of theory:

|   |             |             |             |
|---|-------------|-------------|-------------|
| O | -1.83066500 | -0.00493300 | -0.26491500 |
| C | -0.78014400 | -0.27264400 | 0.25134400  |
| H | -0.66585400 | -1.20988600 | 0.86363600  |
| C | 0.46600500  | 0.56499600  | 0.16592900  |
| H | 0.59463800  | 1.03399000  | 1.15956400  |
| H | 0.28299300  | 1.37518800  | -0.55593100 |
| C | 1.70465600  | -0.25264900 | -0.17614200 |
| H | 1.62643600  | -0.69781500 | -1.17976700 |
| H | 2.60799600  | 0.37345500  | -0.15770300 |
| H | 1.85601100  | -1.07368200 | 0.54273800  |

Cartesian coordinates of the optimized geometry of HBPIn at PBE0-D3BJ/def2-SVP level of theory:

|   |             |             |             |
|---|-------------|-------------|-------------|
| C | 0.78343000  | -0.18432800 | 0.05278800  |
| C | -0.78345900 | -0.18424500 | -0.05281800 |
| O | -1.06701400 | 1.18549000  | -0.39617600 |
| O | 1.06710600  | 1.18545400  | 0.39610400  |
| B | 0.00006900  | 1.93122300  | -0.00002800 |
| H | 0.00008200  | 3.13266800  | -0.00010600 |
| C | -1.47055400 | -0.45411300 | 1.28063500  |
| H | -2.54036000 | -0.22220700 | 1.17979700  |
| H | -1.36918300 | -1.50514600 | 1.58664400  |
| H | -1.05941600 | 0.18399400  | 2.07634000  |
| C | -1.35088800 | -1.09010400 | -1.12866400 |
| H | -1.08066800 | -2.13967400 | -0.93796800 |
| H | -2.44780400 | -1.01494500 | -1.13268700 |
| H | -0.99010700 | -0.80833300 | -2.12581200 |
| C | 1.35074600  | -1.09010000 | 1.12873800  |
| H | 1.08043700  | -2.13965900 | 0.93810400  |
| H | 2.44766800  | -1.01503900 | 1.13279900  |
| H | 0.98993800  | -0.80822900 | 2.12584800  |
| C | 1.47059100  | -0.45429000 | -1.28060700 |
| H | 2.54040900  | -0.22246200 | -1.17972800 |
| H | 1.36916800  | -1.50533600 | -1.58655400 |
| H | 1.05955000  | 0.18378600  | -2.07638500 |

Cartesian coordinates of the optimized geometry of EtCH<sub>2</sub>OBPIn at PBE0-D3BJ/def2-SVP level of theory:

|   |             |             |             |
|---|-------------|-------------|-------------|
| O | -1.68618400 | -0.20898700 | -1.11855700 |
| C | -2.64967200 | 0.76082400  | -0.75743800 |
| H | -3.41710400 | 0.75227500  | -1.54896500 |
| C | -3.28265800 | 0.45839700  | 0.58901100  |
| H | -4.00598100 | 1.26247500  | 0.80913700  |
| H | -2.49984300 | 0.53096500  | 1.36314900  |
| C | -3.96499800 | -0.89818800 | 0.64980400  |
| H | -3.25330000 | -1.70596100 | 0.42326000  |
| H | -4.39055800 | -1.08959300 | 1.64624400  |
| H | -4.78461700 | -0.96650700 | -0.08368200 |
| H | -2.19062800 | 1.76363000  | -0.73987800 |
| C | 1.43120200  | 0.75286300  | 0.28876200  |
| C | 1.64761700  | -0.76095300 | -0.07140900 |
| B | -0.42962900 | -0.11727900 | -0.63775600 |
| O | 0.00334000  | 0.87744500  | 0.20646000  |
| O | 0.54621500  | -1.02490900 | -0.95087900 |
| C | 1.48831700  | -1.67810200 | 1.13621100  |
| H | 1.42279100  | -2.71694600 | 0.78285000  |
| H | 2.33807700  | -1.59762700 | 1.82916100  |
| H | 0.56417900  | -1.44866100 | 1.68723200  |
| C | 2.94486400  | -1.06304600 | -0.79612500 |
| H | 3.81260800  | -0.78588600 | -0.17861000 |
| H | 3.00615900  | -2.14022400 | -1.00817000 |
| H | 3.00502400  | -0.52825400 | -1.75243100 |
| C | 1.88395500  | 1.14938900  | 1.68038900  |
| H | 2.96338800  | 0.97552800  | 1.80496300  |
| H | 1.68981600  | 2.21974400  | 1.84165400  |
| H | 1.34423900  | 0.58831100  | 2.45375800  |
| C | 2.02500500  | 1.69483100  | -0.75210400 |
| H | 1.64640400  | 2.71029200  | -0.56680400 |
| H | 3.12307300  | 1.71891900  | -0.70436200 |
| H | 1.72565300  | 1.39944100  | -1.76852900 |

Cartesian coordinates of the optimized geometry of **C** at PBE0-D3BJ/def2-SVP level of theory:

|    |             |             |             |
|----|-------------|-------------|-------------|
| Ga | 0.64267600  | 0.17658600  | -0.35516700 |
| Cl | -0.06738400 | -0.65891000 | -2.34510400 |
| Si | -0.64225600 | -0.56587800 | 1.66755500  |
| N  | 2.60557100  | -0.31001300 | -0.45878600 |
| N  | 0.99176200  | 2.08204100  | -0.82912600 |
| C  | 3.47533900  | 0.40662100  | -1.15566000 |
| C  | 3.16931500  | 1.63473500  | -1.76917100 |
| H  | 3.96768800  | 2.07305100  | -2.36660500 |
| C  | 2.05790600  | 2.44797500  | -1.54665000 |
| C  | 4.90251800  | -0.04707700 | -1.31490200 |
| H  | 5.05001800  | -0.43857300 | -2.33278200 |
| H  | 5.17797000  | -0.83402100 | -0.60359400 |
| H  | 5.58190300  | 0.80720900  | -1.19281700 |
| C  | 2.11559100  | 3.84283800  | -2.10589600 |
| H  | 3.02311500  | 3.98727900  | -2.70346400 |
| H  | 2.09899500  | 4.58934300  | -1.29850200 |
| H  | 1.23599700  | 4.04695700  | -2.73189200 |
| C  | 3.01292800  | -1.52548500 | 0.16362900  |
| C  | 3.22676600  | -2.69123800 | -0.60499400 |
| C  | 3.58925300  | -3.86461800 | 0.06531000  |
| H  | 3.75647000  | -4.77601300 | -0.51399600 |
| C  | 3.72652200  | -3.89819300 | 1.44575000  |
| H  | 4.00174900  | -4.82858700 | 1.94809100  |
| C  | 3.51299800  | -2.74155900 | 2.18857500  |
| H  | 3.62719400  | -2.77342600 | 3.27291600  |
| C  | 3.16231600  | -1.53964100 | 1.57024300  |
| C  | 3.07732400  | -2.73457700 | -2.11670700 |
| H  | 2.83801600  | -1.71968800 | -2.46637700 |
| C  | 4.36898900  | -3.19713100 | -2.79601400 |
| H  | 4.57394900  | -4.25807600 | -2.58172500 |
| H  | 5.24591000  | -2.62245000 | -2.46590700 |
| H  | 4.28387300  | -3.09609900 | -3.88916400 |



|   |             |             |             |
|---|-------------|-------------|-------------|
| C | 1.91439800  | -3.62857300 | -2.54698500 |
| H | 0.95904600  | -3.24739500 | -2.16838100 |
| H | 2.04978000  | -4.66292700 | -2.19174500 |
| H | 1.84446200  | -3.65541500 | -3.64549500 |
| C | 3.01419100  | -0.26515200 | 2.38120100  |
| H | 2.20283400  | 0.31915700  | 1.91754700  |
| C | 4.28562200  | 0.58293700  | 2.30223100  |
| H | 5.14626300  | 0.03612500  | 2.71962900  |
| H | 4.16467100  | 1.51476400  | 2.87714000  |
| H | 4.53093700  | 0.86089900  | 1.26798600  |
| C | 2.61402500  | -0.50805300 | 3.83075000  |
| H | 3.41532900  | -1.00122900 | 4.40392000  |
| H | 1.70103600  | -1.11824500 | 3.89377200  |
| H | 2.40492200  | 0.45069000  | 4.32713200  |
| C | 0.08865300  | 3.10919000  | -0.42812700 |
| C | -1.00916500 | 3.45701200  | -1.24306100 |
| C | -1.84229300 | 4.49891300  | -0.82297800 |
| H | -2.69866900 | 4.77908500  | -1.44126100 |
| C | -1.59767400 | 5.18709900  | 0.36033200  |
| H | -2.25914300 | 6.00028900  | 0.66837500  |
| C | -0.51216600 | 4.83193900  | 1.15309200  |
| H | -0.32540500 | 5.37202100  | 2.08494700  |
| C | 0.34549800  | 3.79361700  | 0.77959400  |
| C | -1.29585600 | 2.73487000  | -2.54501300 |
| H | -0.44566000 | 2.06836100  | -2.75078100 |
| C | -1.44719500 | 3.69242100  | -3.72597900 |
| H | -2.33607800 | 4.33478100  | -3.62182200 |
| H | -1.56051300 | 3.12533600  | -4.66273400 |
| H | -0.57414700 | 4.35380000  | -3.83680700 |
| C | -2.52536500 | 1.84000400  | -2.40922000 |
| H | -2.40987100 | 1.14685200  | -1.56482800 |
| H | -2.66694300 | 1.23944100  | -3.32073300 |
| H | -3.43683600 | 2.43857500  | -2.24610700 |
| C | 1.53318300  | 3.44449900  | 1.65858800  |
| H | 2.08496800  | 2.63449000  | 1.15953100  |
| C | 2.49293800  | 4.62569600  | 1.80515700  |
| H | 3.38434300  | 4.32854300  | 2.37955600  |
| H | 2.02108000  | 5.46789800  | 2.33591800  |
| H | 2.83241000  | 4.99697500  | 0.82663100  |
| C | 1.09311700  | 2.92232500  | 3.02527900  |
| H | 1.97020200  | 2.71396400  | 3.65725700  |
| H | 0.51872900  | 1.98746600  | 2.93633300  |
| H | 0.46654800  | 3.65585200  | 3.55706800  |
| N | -2.39961600 | -0.05207900 | 1.08609100  |
| N | -1.56256900 | -2.00656800 | 0.81100200  |
| C | -2.67545700 | -1.29852000 | 0.67139200  |
| C | -3.96325100 | -1.75838500 | 0.09433300  |
| C | -4.94004600 | -2.41246400 | 0.85036100  |
| H | -4.76235600 | -2.61647600 | 1.90818300  |
| C | -6.14220900 | -2.79552400 | 0.25795800  |
| H | -6.90358100 | -3.30238400 | 0.85532400  |
| C | -6.37230800 | -2.53177200 | -1.09125000 |
| H | -7.31542600 | -2.83244400 | -1.55366400 |
| C | -5.39571100 | -1.88686500 | -1.85065700 |
| H | -5.56918200 | -1.68420000 | -2.90999400 |
| C | -4.19540800 | -1.50015300 | -1.26234500 |
| H | -3.41853200 | -1.00493800 | -1.84915000 |
| C | -1.29557400 | -3.41830400 | 0.53248800  |
| C | 0.19666400  | -3.61561100 | 0.75982200  |
| H | 0.47881500  | -3.34150000 | 1.78811000  |
| H | 0.77802300  | -2.99463600 | 0.06862300  |
| H | 0.48320000  | -4.66316700 | 0.59337900  |
| C | -2.06669200 | -4.29931200 | 1.52112900  |
| H | -1.84431800 | -3.99823100 | 2.55611500  |
| H | -1.77304000 | -5.35273700 | 1.39541500  |
| H | -3.15103700 | -4.23254900 | 1.35843000  |
| C | -1.65527100 | -3.78708400 | -0.90847900 |
| H | -2.74258800 | -3.80657200 | -1.06395400 |
| H | -1.26408200 | -4.78836600 | -1.14403000 |

|   |             |             |             |
|---|-------------|-------------|-------------|
| H | -1.21691900 | -3.06120100 | -1.60818900 |
| C | -3.33493400 | 0.91207900  | 1.68361800  |
| C | -3.86712400 | 0.35142000  | 3.00778000  |
| H | -3.02951900 | 0.07405200  | 3.66624700  |
| H | -4.48974400 | -0.53946500 | 2.84028400  |
| H | -4.48574300 | 1.10091600  | 3.52521700  |
| C | -4.50151900 | 1.26449800  | 0.75912100  |
| H | -5.08422400 | 2.08025800  | 1.21323200  |
| H | -5.18150000 | 0.41793200  | 0.59839500  |
| H | -4.13606100 | 1.60829900  | -0.21661600 |
| C | -2.52404000 | 2.16970000  | 1.96081800  |
| H | -1.68142300 | 1.94491500  | 2.63243200  |
| H | -3.14559200 | 2.93785100  | 2.44258700  |
| H | -2.12497200 | 2.58294500  | 1.02753400  |

Cartesian coordinates of the optimized geometry of **S1** at PBE0-D3BJ/def2-SVP level of theory:

|    |             |             |             |
|----|-------------|-------------|-------------|
| Ga | 0.89242400  | 0.20118200  | -0.80136900 |
| Cl | 0.74648400  | -0.18100900 | -3.02284500 |
| Si | -0.69201500 | -1.05620200 | 0.48377100  |
| N  | 2.81397300  | -0.23179300 | -0.50053300 |
| N  | 1.19915700  | 2.14644100  | -0.79472100 |
| C  | 3.72480700  | 0.54731400  | -1.06394400 |
| C  | 3.42696500  | 1.79905200  | -1.64613100 |
| H  | 4.24199200  | 2.27022900  | -2.19460500 |
| C  | 2.28815300  | 2.57806600  | -1.44965200 |
| C  | 5.16678500  | 0.12721400  | -1.12101200 |
| H  | 5.39082400  | -0.23183100 | -2.13769000 |
| H  | 5.39489400  | -0.68093700 | -0.41645600 |
| H  | 5.82377400  | 0.98441900  | -0.92294100 |
| C  | 2.28186500  | 3.96263800  | -2.03421400 |
| H  | 3.29257500  | 4.28816900  | -2.30771200 |
| H  | 1.83079600  | 4.69976000  | -1.35783000 |
| H  | 1.66374800  | 3.94620100  | -2.94707800 |
| C  | 3.17898800  | -1.44826800 | 0.15903100  |
| C  | 3.42528400  | -2.61733300 | -0.59087900 |
| C  | 3.72489600  | -3.79671600 | 0.10054800  |
| H  | 3.91495000  | -4.71118900 | -0.46663800 |
| C  | 3.77828000  | -3.82566900 | 1.48667900  |
| H  | 4.00516800  | -4.75828000 | 2.00887800  |
| C  | 3.54065500  | -2.66173400 | 2.21058800  |
| H  | 3.58004900  | -2.69199700 | 3.29987200  |
| C  | 3.24218200  | -1.45756300 | 1.57082100  |
| C  | 3.37857700  | -2.65272500 | -2.10659000 |
| H  | 3.11968000  | -1.64611300 | -2.46607400 |
| C  | 4.72609800  | -3.05416100 | -2.70956100 |
| H  | 4.98403700  | -4.09366700 | -2.45158300 |
| H  | 5.54841300  | -2.41647500 | -2.35556100 |
| H  | 4.68967400  | -2.98713400 | -3.80817000 |
| C  | 2.27924000  | -3.59235100 | -2.59587800 |
| H  | 1.31852200  | -3.34440300 | -2.13130500 |
| H  | 2.51161000  | -4.64204200 | -2.35429700 |
| H  | 2.15802500  | -3.51331500 | -3.68704200 |
| C  | 3.04143300  | -0.18723000 | 2.37292200  |
| H  | 2.24946000  | 0.38172300  | 1.86129200  |
| C  | 4.31747700  | 0.65833100  | 2.37492400  |
| H  | 5.15863300  | 0.08912300  | 2.80190400  |
| H  | 4.18215500  | 1.56440100  | 2.98532200  |
| H  | 4.60700800  | 0.98162600  | 1.36578200  |
| C  | 2.55787900  | -0.43733500 | 3.79560600  |
| H  | 3.33224900  | -0.91313700 | 4.41881400  |
| H  | 1.65642300  | -1.06436800 | 3.77782900  |
| H  | 2.30327300  | 0.51894100  | 4.27596400  |
| C  | 0.27970000  | 3.10083100  | -0.26981300 |
| C  | -0.89577500 | 3.42715100  | -0.97304900 |
| C  | -1.78895100 | 4.33737400  | -0.39743700 |
| H  | -2.70989500 | 4.58997800  | -0.92925200 |

|   |             |             |             |
|---|-------------|-------------|-------------|
| C | -1.51429200 | 4.94267000  | 0.82191500  |
| H | -2.21900900 | 5.65845800  | 1.25167500  |
| C | -0.33426200 | 4.63667100  | 1.49122800  |
| H | -0.12245400 | 5.11618400  | 2.44892000  |
| C | 0.57325800  | 3.70902100  | 0.97434800  |
| C | -1.19872200 | 2.84527600  | -2.33765700 |
| H | -0.33248800 | 2.24494000  | -2.65112200 |
| C | -1.41022300 | 3.93628200  | -3.38693700 |
| H | -2.31688600 | 4.52899200  | -3.18558100 |
| H | -1.52326100 | 3.48759900  | -4.38596400 |
| H | -0.56054300 | 4.63479900  | -3.42145900 |
| C | -2.39517900 | 1.90195400  | -2.27677900 |
| H | -2.20465500 | 1.06487600  | -1.59033500 |
| H | -2.60568300 | 1.47404600  | -3.26812100 |
| H | -3.29816400 | 2.43298100  | -1.93262300 |
| C | 1.84251100  | 3.37892900  | 1.73949900  |
| H | 2.18539300  | 2.39962600  | 1.37427600  |
| C | 2.95623700  | 4.38985600  | 1.45705600  |
| H | 3.86125700  | 4.13151500  | 2.02881900  |
| H | 2.64695600  | 5.40568700  | 1.75227800  |
| H | 3.23377500  | 4.41654100  | 0.39530700  |
| C | 1.61344000  | 3.26129500  | 3.24410900  |
| H | 2.53585600  | 2.92562300  | 3.74064800  |
| H | 0.82046800  | 2.53905400  | 3.47925900  |
| H | 1.34234800  | 4.22803000  | 3.69634900  |
| N | -2.28290400 | -0.35382200 | 1.10236200  |
| N | -2.24752000 | -1.49266400 | -0.72376700 |
| C | -3.04265900 | -0.89343000 | 0.13341600  |
| C | -4.52678800 | -0.86055200 | 0.09689200  |
| C | -5.25322000 | -1.68268300 | 0.96527900  |
| H | -4.72130100 | -2.34520800 | 1.65084100  |
| C | -6.64472000 | -1.67428100 | 0.93655500  |
| H | -7.20445400 | -2.32485700 | 1.61228800  |
| C | -7.32098300 | -0.83977700 | 0.04693300  |
| H | -8.41320400 | -0.83062500 | 0.02759500  |
| C | -6.59965200 | -0.01956800 | -0.81909900 |
| H | -7.12431700 | 0.63682000  | -1.51699900 |
| C | -5.20694100 | -0.03218100 | -0.79959900 |
| H | -4.64192800 | 0.61645000  | -1.46948500 |
| C | -2.55705700 | -2.39950800 | -1.83128100 |
| C | -1.27345000 | -3.17500900 | -2.11363900 |
| H | -0.96222200 | -3.75822400 | -1.23527300 |
| H | -0.47001200 | -2.47628300 | -2.38103200 |
| H | -1.42226800 | -3.86336400 | -2.95869900 |
| C | -3.66678800 | -3.39439000 | -1.47871300 |
| H | -3.44714200 | -3.89788800 | -0.52446000 |
| H | -3.72688800 | -4.16387100 | -2.26306800 |
| H | -4.65325300 | -2.91853000 | -1.40402200 |
| C | -2.93075800 | -1.60469100 | -3.08509000 |
| H | -3.85009000 | -1.02199800 | -2.93101300 |
| H | -3.10329300 | -2.29134700 | -3.92813100 |
| H | -2.11215800 | -0.92316900 | -3.35594400 |
| C | -2.62875600 | 0.47814900  | 2.26147600  |
| C | -2.98841600 | -0.41820200 | 3.44952700  |
| H | -2.15854900 | -1.11069500 | 3.65108200  |
| H | -3.90065400 | -0.99920400 | 3.25247700  |
| H | -3.16430300 | 0.19052700  | 4.34974500  |
| C | -3.76194100 | 1.45856900  | 1.95100000  |
| H | -3.85812000 | 2.16801100  | 2.78638900  |
| H | -4.73292600 | 0.96400700  | 1.82082700  |
| H | -3.53332400 | 2.03764900  | 1.04312300  |
| C | -1.38193000 | 1.28720100  | 2.61077900  |
| H | -0.54404500 | 0.61949700  | 2.85391300  |
| H | -1.58708700 | 1.93273300  | 3.47733900  |
| H | -1.09723200 | 1.93368300  | 1.76981000  |
| O | 0.15880400  | -1.31936300 | 1.99922500  |
| C | -0.03446900 | -2.56950900 | 1.27558900  |
| H | 0.92312200  | -3.01591000 | 0.95654100  |
| C | -0.90105700 | -3.57512100 | 1.99720500  |

|   |             |             |            |
|---|-------------|-------------|------------|
| H | -1.05114900 | -4.44344300 | 1.33107100 |
| H | -1.90434100 | -3.15101800 | 2.18182000 |
| C | -0.28612100 | -4.02288200 | 3.31617300 |
| H | -0.13101900 | -3.15544100 | 3.97583900 |
| H | -0.92347000 | -4.74880700 | 3.84522900 |
| H | 0.69857500  | -4.48888200 | 3.15042900 |

Cartesian coordinates of the optimized geometry of **S2** at PBE0-D3BJ/def2-SVP level of theory:

|    |             |             |             |
|----|-------------|-------------|-------------|
| Ga | 1.39532100  | -0.24659300 | -0.44764700 |
| Cl | 0.48995600  | -1.46110500 | -2.09741100 |
| Si | -2.11341600 | -1.11484100 | 1.87112900  |
| O  | -0.84206400 | -0.28914800 | 1.07789400  |
| N  | 1.49182800  | 1.54685200  | -1.25316500 |
| N  | 3.31436600  | -0.62283900 | -0.66056100 |
| N  | -3.17612800 | -1.74117700 | 0.39235400  |
| N  | -3.51098500 | 0.09837500  | 1.43637100  |
| C  | 2.33374800  | 1.71701100  | -2.27231600 |
| C  | 3.38313400  | 0.83070000  | -2.57687800 |
| H  | 3.94136800  | 1.05431000  | -3.48484000 |
| C  | 3.89972900  | -0.20504000 | -1.78162400 |
| C  | 2.16619200  | 2.91051500  | -3.16937300 |
| H  | 1.30168500  | 2.74938500  | -3.83183000 |
| H  | 3.05578500  | 3.06705500  | -3.79055000 |
| H  | 1.95583800  | 3.82213300  | -2.59421200 |
| C  | 5.15679700  | -0.88000000 | -2.25073800 |
| H  | 5.80203200  | -1.17706300 | -1.41408700 |
| H  | 5.72052900  | -0.24505000 | -2.94477800 |
| H  | 4.87469100  | -1.80426500 | -2.78160000 |
| C  | 0.55321800  | 2.57102700  | -0.91339500 |
| C  | -0.68476700 | 2.65412800  | -1.58150300 |
| C  | -1.56831600 | 3.67636500  | -1.21890200 |
| H  | -2.53067300 | 3.75300200  | -1.73071300 |
| C  | -1.24975600 | 4.58780900  | -0.22243700 |
| H  | -1.95539000 | 5.37690100  | 0.04774000  |
| C  | -0.03263000 | 4.48239300  | 0.44190100  |
| H  | 0.20606700  | 5.19342600  | 1.23412700  |
| C  | 0.88570200  | 3.48079000  | 0.11692200  |
| C  | -1.10670800 | 1.65871500  | -2.64233400 |
| H  | -0.24848300 | 1.00934000  | -2.86618400 |
| C  | -1.54323800 | 2.33407800  | -3.94175700 |
| H  | -2.46510500 | 2.92213300  | -3.80711000 |
| H  | -1.74894800 | 1.57570800  | -4.71286000 |
| H  | -0.77420200 | 3.01705100  | -4.33439000 |
| C  | -2.21106400 | 0.75388100  | -2.09951000 |
| H  | -1.90241800 | 0.25108300  | -1.17238900 |
| H  | -2.46948400 | -0.02010900 | -2.83816300 |
| H  | -3.11842300 | 1.34186100  | -1.88470800 |
| C  | 2.21298800  | 3.38980400  | 0.84751900  |
| H  | 2.46264100  | 2.31964900  | 0.90636500  |
| C  | 3.34546200  | 4.07155300  | 0.07682800  |
| H  | 3.11180800  | 5.13258300  | -0.10593600 |
| H  | 3.53582500  | 3.59040300  | -0.89176800 |
| H  | 4.28259000  | 4.02703100  | 0.65398400  |
| C  | 2.15028500  | 3.92567900  | 2.27452200  |
| H  | 1.30576200  | 3.49916200  | 2.83557800  |
| H  | 2.05338400  | 5.02259600  | 2.29663700  |
| H  | 3.07491900  | 3.67336900  | 2.81361500  |
| C  | 4.00306400  | -1.45649400 | 0.27156900  |
| C  | 3.89060100  | -2.85946100 | 0.20466900  |
| C  | 4.55287200  | -3.62615300 | 1.16955100  |
| H  | 4.47083100  | -4.71518700 | 1.13032400  |
| C  | 5.30907900  | -3.03194300 | 2.17044500  |
| H  | 5.81897500  | -3.64888700 | 2.91411300  |
| C  | 5.41135800  | -1.64585700 | 2.22517000  |
| H  | 6.00498200  | -1.18366600 | 3.01625200  |
| C  | 4.76350800  | -0.83538100 | 1.29026000  |

|   |             |             |             |
|---|-------------|-------------|-------------|
| C | 3.07620300  | -3.55548400 | -0.86601200 |
| H | 2.70566200  | -2.79004300 | -1.56243300 |
| C | 3.91580300  | -4.54851700 | -1.66902900 |
| H | 4.26029000  | -5.39042700 | -1.04750900 |
| H | 4.80857500  | -4.07075500 | -2.10067600 |
| H | 3.32195300  | -4.96994200 | -2.49480900 |
| C | 1.84717500  | -4.23449000 | -0.26283800 |
| H | 2.13370600  | -5.04452000 | 0.42725700  |
| H | 1.21528600  | -4.66375800 | -1.05485600 |
| H | 1.22979200  | -3.51716600 | 0.29594800  |
| C | 4.90785000  | 0.67396500  | 1.35492300  |
| H | 4.02562100  | 1.09710700  | 0.85082600  |
| C | 6.13936300  | 1.15508300  | 0.58413000  |
| H | 7.05788200  | 0.71065000  | 1.00008500  |
| H | 6.23229400  | 2.25052300  | 0.64903200  |
| H | 6.08904300  | 0.89072700  | -0.48030500 |
| C | 4.93737500  | 1.21368900  | 2.78192800  |
| H | 4.07940300  | 0.86041700  | 3.37275800  |
| H | 4.91333400  | 2.31373300  | 2.76950800  |
| H | 5.85652500  | 0.92131700  | 3.31300700  |
| C | -4.06603300 | -0.77073700 | 0.59488600  |
| C | -5.46637200 | -0.72666300 | 0.09579000  |
| C | -6.51511500 | -1.08547200 | 0.94965800  |
| H | -6.29090600 | -1.41657300 | 1.96611200  |
| C | -7.83291800 | -1.03500500 | 0.50162300  |
| H | -8.64542300 | -1.32253400 | 1.17294400  |
| C | -8.11340500 | -0.61928100 | -0.79946300 |
| H | -9.14748400 | -0.57597600 | -1.14926900 |
| C | -7.07107900 | -0.26086000 | -1.65327300 |
| H | -7.28576800 | 0.06617700  | -2.67323000 |
| C | -5.75165000 | -0.31751900 | -1.21054300 |
| H | -4.93373200 | -0.03124000 | -1.87357800 |
| C | -3.29880000 | -3.05413700 | -0.23913900 |
| C | -4.38710400 | -3.89756600 | 0.43131100  |
| H | -4.20091200 | -3.96607300 | 1.51419500  |
| H | -4.39141900 | -4.91736100 | 0.01632300  |
| H | -5.38653000 | -3.46654400 | 0.27477800  |
| C | -3.57103000 | -2.91407500 | -1.73851300 |
| H | -4.55597100 | -2.46893600 | -1.93457500 |
| H | -3.55089200 | -3.90604300 | -2.21501500 |
| H | -2.79390500 | -2.29192900 | -2.20499500 |
| C | -1.93822100 | -3.72869200 | -0.05643000 |
| H | -1.69909400 | -3.83987900 | 1.01337300  |
| H | -1.14970000 | -3.12922900 | -0.53475500 |
| H | -1.94095300 | -4.72956200 | -0.51285500 |
| C | -3.93700700 | 1.38970900  | 1.96401300  |
| C | -4.85492200 | 1.19466000  | 3.17541100  |
| H | -4.36732800 | 0.54850000  | 3.92081000  |
| H | -5.80621700 | 0.72902700  | 2.87955400  |
| H | -5.08374300 | 2.16221200  | 3.64862600  |
| C | -2.65835800 | 2.11013800  | 2.40022300  |
| H | -2.89869600 | 3.10398000  | 2.80607800  |
| H | -1.96938800 | 2.22594400  | 1.55196100  |
| H | -2.13795100 | 1.53872700  | 3.18446900  |
| C | -4.63863600 | 2.23363200  | 0.89905200  |
| H | -4.82987200 | 3.24132800  | 1.29773800  |
| H | -5.60271900 | 1.80359600  | 0.59614200  |
| H | -3.99985700 | 2.33424900  | 0.00992100  |
| C | 0.53448600  | -0.51958900 | 1.31220900  |
| H | 0.71213700  | -1.57587100 | 1.60579300  |
| C | 1.08274600  | 0.37892700  | 2.41277400  |
| H | 0.77841400  | 1.41199400  | 2.18243500  |
| H | 2.18461100  | 0.35786400  | 2.36524800  |
| C | 0.64251900  | 0.01497400  | 3.82257500  |
| H | -0.45464800 | 0.01080100  | 3.91777500  |
| H | 0.98993500  | -0.99365900 | 4.09702500  |
| H | 1.04385500  | 0.72598000  | 4.56249700  |

Cartesian coordinates of the optimized geometry of Int-1 at PBE0-D3BJ/def2-SVP level of theory:

|    |             |             |             |
|----|-------------|-------------|-------------|
| Ga | -1.38039800 | -1.08121300 | -0.71388300 |
| Cl | -0.59511300 | -1.16875000 | -2.80544800 |
| Si | 2.12752700  | 0.88829700  | 0.76951700  |
| O  | 0.81389300  | -0.11081200 | 0.74042400  |
| N  | -1.41458700 | -2.99962800 | -0.23699600 |
| N  | -3.32593200 | -0.95692600 | -1.01439100 |
| N  | 3.06089900  | 1.07157700  | -0.78286500 |
| N  | 3.51081500  | -0.39328000 | 0.72941600  |
| C  | -2.28386900 | -3.77934800 | -0.88469800 |
| C  | -3.39553100 | -3.29540300 | -1.59049900 |
| H  | -3.98280400 | -4.04524100 | -2.11821300 |
| C  | -3.93518700 | -1.99896200 | -1.57640800 |
| C  | -2.07435400 | -5.26785800 | -0.89300500 |
| H  | -1.26887500 | -5.51527400 | -1.60204000 |
| H  | -2.98410700 | -5.79187400 | -1.20837200 |
| H  | -1.75632100 | -5.64434600 | 0.08767800  |
| C  | -5.25861800 | -1.80454700 | -2.26007700 |
| H  | -5.07251500 | -1.42864800 | -3.27910500 |
| H  | -5.88151400 | -1.05717500 | -1.75285800 |
| H  | -5.80803000 | -2.75018500 | -2.34015600 |
| C  | -0.41797000 | -3.60538000 | 0.59008400  |
| C  | 0.79362600  | -4.05915000 | 0.02871700  |
| C  | 1.72374700  | -4.67755300 | 0.86961900  |
| H  | 2.65974900  | -5.04881800 | 0.44553400  |
| C  | 1.47885000  | -4.83609900 | 2.22769700  |
| H  | 2.22141000  | -5.31874300 | 2.86748500  |
| C  | 0.28378300  | -4.37645500 | 2.76880200  |
| H  | 0.09340200  | -4.50479700 | 3.83608400  |
| C  | -0.68432100 | -3.76350200 | 1.96834100  |
| C  | 1.11701400  | -3.88383000 | -1.44126500 |
| H  | 0.20914700  | -3.53145100 | -1.94979000 |
| C  | 1.55888900  | -5.18425900 | -2.10997700 |
| H  | 2.52409200  | -5.54145600 | -1.71678100 |
| H  | 1.68419800  | -5.03020200 | -3.19279700 |
| H  | 0.82671000  | -5.99325500 | -1.96506900 |
| C  | 2.17047900  | -2.79357500 | -1.62712300 |
| H  | 1.88073000  | -1.86503000 | -1.11659100 |
| H  | 2.30753300  | -2.56656200 | -2.69542200 |
| H  | 3.13555200  | -3.12273600 | -1.21074000 |
| C  | -2.00898200 | -3.33583200 | 2.57099900  |
| H  | -2.42143100 | -2.56048000 | 1.90856500  |
| C  | -3.02128500 | -4.48312400 | 2.58523600  |
| H  | -2.64238000 | -5.33520400 | 3.17213800  |
| H  | -3.24867700 | -4.84301300 | 1.57248500  |
| H  | -3.96903800 | -4.15299800 | 3.03929800  |
| C  | -1.86107300 | -2.73466000 | 3.96628300  |
| H  | -1.08542300 | -1.95549400 | 3.99536100  |
| H  | -1.60170700 | -3.49858600 | 4.71575200  |
| H  | -2.81050500 | -2.27929600 | 4.28600300  |
| C  | -4.02611000 | 0.27667300  | -0.83545500 |
| C  | -4.03062500 | 1.25089800  | -1.85381900 |
| C  | -4.70996200 | 2.45100000  | -1.61738300 |
| H  | -4.71659600 | 3.21986100  | -2.39347500 |
| C  | -5.37139900 | 2.68171800  | -0.41919900 |
| H  | -5.89190200 | 3.62778500  | -0.25338200 |
| C  | -5.36583700 | 1.70658900  | 0.57302700  |
| H  | -5.88676400 | 1.89693300  | 1.51287400  |
| C  | -4.69919300 | 0.49312200  | 0.39002200  |
| C  | -3.33879000 | 1.03383600  | -3.18493000 |
| H  | -2.96045700 | 0.00216600  | -3.20347900 |
| C  | -4.29869100 | 1.20391400  | -4.36259700 |
| H  | -4.64898400 | 2.24419800  | -4.45434700 |
| H  | -5.18952200 | 0.56500400  | -4.26471100 |
| H  | -3.79371600 | 0.94381300  | -5.30575900 |
| C  | -2.12584700 | 1.94907200  | -3.34114700 |
| H  | -2.42997400 | 3.00291400  | -3.43291100 |

|   |             |             |             |
|---|-------------|-------------|-------------|
| H | -1.55454000 | 1.67557300  | -4.24084900 |
| H | -1.44485800 | 1.87335800  | -2.48265200 |
| C | -4.73278300 | -0.57538600 | 1.46926000  |
| H | -3.80454500 | -1.15706700 | 1.36515100  |
| C | -5.89472900 | -1.55131500 | 1.26968800  |
| H | -6.85952600 | -1.01948000 | 1.28374100  |
| H | -5.90850300 | -2.30032300 | 2.07733200  |
| H | -5.82104200 | -2.09551900 | 0.31909700  |
| C | -4.76897800 | -0.00307100 | 2.88351500  |
| H | -3.98609600 | 0.75232700  | 3.04344200  |
| H | -4.62115000 | -0.80782000 | 3.61959000  |
| H | -5.74010600 | 0.46371100  | 3.11111400  |
| C | 3.96748800  | 0.16785400  | -0.38247300 |
| C | 5.29159300  | -0.05578700 | -1.00931300 |
| C | 6.28390500  | 0.91541000  | -0.83910800 |
| H | 6.06952800  | 1.80883500  | -0.24859200 |
| C | 7.53669800  | 0.74029500  | -1.42122700 |
| H | 8.30957000  | 1.49938600  | -1.28207500 |
| C | 7.79921800  | -0.39656800 | -2.18450500 |
| H | 8.77963000  | -0.52947000 | -2.64758500 |
| C | 6.80835800  | -1.36213800 | -2.35858300 |
| H | 7.00861500  | -2.25066700 | -2.96136100 |
| C | 5.55814400  | -1.19787600 | -1.76844200 |
| H | 4.77647200  | -1.94450200 | -1.91226800 |
| C | 2.92096100  | 1.85342400  | -2.02547500 |
| C | 3.47311300  | 3.26010400  | -1.79027100 |
| H | 2.94953400  | 3.75145600  | -0.95735800 |
| H | 3.32617900  | 3.87696200  | -2.68944600 |
| H | 4.55160700  | 3.22882000  | -1.57126800 |
| C | 3.62953300  | 1.18447900  | -3.20281700 |
| H | 4.72377300  | 1.21145100  | -3.12211000 |
| H | 3.35062700  | 1.72067700  | -4.12123200 |
| H | 3.30578200  | 0.13851700  | -3.31468000 |
| C | 1.42661000  | 1.91715300  | -2.33560100 |
| H | 0.87354600  | 2.45045000  | -1.54924400 |
| H | 1.01469900  | 0.90780700  | -2.47660400 |
| H | 1.26897500  | 2.48161900  | -3.26667400 |
| C | 4.18787800  | -1.14711300 | 1.78922700  |
| C | 5.30163800  | -0.30679100 | 2.42092500  |
| H | 4.90923100  | 0.65814700  | 2.77321900  |
| H | 6.11134900  | -0.11341900 | 1.70241500  |
| H | 5.73534300  | -0.83607700 | 3.28286400  |
| C | 3.10488800  | -1.44837000 | 2.82712100  |
| H | 3.52027700  | -2.04713200 | 3.65041300  |
| H | 2.27455400  | -2.00455800 | 2.36968500  |
| H | 2.70305800  | -0.51745800 | 3.25582200  |
| C | 4.76004300  | -2.46545400 | 1.27034900  |
| H | 5.16255300  | -3.04703100 | 2.11317300  |
| H | 5.57635300  | -2.30470100 | 0.55381000  |
| H | 3.97168000  | -3.06015900 | 0.79132800  |
| C | -0.55708700 | 0.23771800  | 0.53824800  |
| H | -0.61170000 | 1.24710700  | 0.09506900  |
| C | -1.35450600 | 0.23078800  | 1.83604300  |
| H | -1.57834500 | -0.80247900 | 2.13673300  |
| H | -2.32302000 | 0.69431100  | 1.59239100  |
| C | -0.72947800 | 0.94421800  | 3.01946900  |
| H | 0.17801800  | 0.41441100  | 3.34544200  |
| H | -0.45771900 | 1.98097700  | 2.77914900  |
| H | -1.42523800 | 0.95352900  | 3.87327700  |
| C | 2.55019000  | 2.25507800  | 1.91103000  |
| O | 1.35173000  | 2.53615500  | 1.09946000  |
| H | 3.38069900  | 2.87521400  | 1.52509200  |
| C | 2.45376100  | 2.38568000  | 3.41081600  |
| H | 1.61296200  | 1.79174900  | 3.79322300  |
| H | 3.36632400  | 1.90436500  | 3.80814800  |
| C | 2.36398200  | 3.81376700  | 3.93104500  |
| H | 2.38256000  | 3.82595200  | 5.03217300  |
| H | 3.21127000  | 4.41880100  | 3.57107900  |
| H | 1.43877400  | 4.29854000  | 3.58825000  |

|   |             |            |             |
|---|-------------|------------|-------------|
| H | 2.01473000  | 4.61895200 | 0.89890100  |
| C | -0.80400300 | 5.08615100 | -0.18466200 |
| C | -1.20811500 | 4.87281200 | 1.31614600  |
| O | 0.01114000  | 4.46518000 | 1.90368700  |
| O | 0.18146400  | 4.08837200 | -0.36580800 |
| C | -1.70188200 | 6.12799200 | 2.02085400  |
| H | -2.59390500 | 6.54313000 | 1.52527900  |
| H | -1.97150700 | 5.88503500 | 3.05997800  |
| H | -0.92047900 | 6.89830700 | 2.05007700  |
| C | -2.25018100 | 3.76633300 | 1.46879800  |
| H | -1.95824600 | 2.87227600 | 0.90203400  |
| H | -2.32642600 | 3.49063900 | 2.53093600  |
| H | -3.24577400 | 4.07978700 | 1.12211800  |
| C | -0.16270000 | 6.45555600 | -0.42163200 |
| H | 0.30298300  | 6.45223200 | -1.41840000 |
| H | -0.89868900 | 7.27250600 | -0.38251700 |
| H | 0.62562900  | 6.65367000 | 0.31831200  |
| C | -1.93167000 | 4.87626100 | -1.17747000 |
| H | -2.75022900 | 5.59144800 | -1.00070700 |
| H | -1.55745200 | 5.02989600 | -2.20093800 |
| H | -2.33654300 | 3.85982700 | -1.11317200 |
| B | 0.92267300  | 4.02804100 | 0.86898500  |

Cartesian coordinates of the optimized geometry of Int-2 at PBE0-D3BJ/def2-SVP level of theory:

|    |             |             |             |
|----|-------------|-------------|-------------|
| Ga | 1.31263500  | 0.17213800  | -0.68937700 |
| Cl | 0.23473800  | -0.02371200 | -2.64100300 |
| Si | -2.07898400 | -1.54591600 | 0.86677200  |
| O  | -0.86351800 | -0.41261600 | 1.07272300  |
| N  | 1.85546500  | 2.06352800  | -0.75617700 |
| N  | 3.11669200  | -0.52283600 | -1.08862700 |
| N  | -3.23691300 | -1.30517600 | -0.55134200 |
| N  | -3.45110200 | -0.28859200 | 1.33145100  |
| C  | 2.72601300  | 2.40003300  | -1.71030700 |
| C  | 3.56014600  | 1.47619600  | -2.35819800 |
| H  | 4.17986000  | 1.87777900  | -3.15982300 |
| C  | 3.83840700  | 0.14897900  | -1.98119500 |
| C  | 2.81803500  | 3.83388400  | -2.15007100 |
| H  | 2.01110800  | 4.03436400  | -2.87310200 |
| H  | 3.77639600  | 4.03931600  | -2.64188800 |
| H  | 2.67735900  | 4.52990600  | -1.31306000 |
| C  | 5.01382300  | -0.49925800 | -2.65898200 |
| H  | 4.80437600  | -0.54911700 | -3.73889600 |
| H  | 5.20083000  | -1.51489300 | -2.29188700 |
| H  | 5.92234600  | 0.10581000  | -2.53442600 |
| C  | 1.18186500  | 3.06032500  | 0.01423400  |
| C  | -0.02869000 | 3.61929900  | -0.44294700 |
| C  | -0.68054100 | 4.55528200  | 0.36689100  |
| H  | -1.62337700 | 4.98928000  | 0.02499300  |
| C  | -0.15483700 | 4.93927900  | 1.59180000  |
| H  | -0.67951000 | 5.66981600  | 2.21201700  |
| C  | 1.04521500  | 4.38769800  | 2.02747800  |
| H  | 1.45352900  | 4.69529200  | 2.99119700  |
| C  | 1.73352700  | 3.44536300  | 1.25910700  |
| C  | -0.65271000 | 3.23368300  | -1.76792400 |
| H  | 0.03972400  | 2.56040100  | -2.29135400 |
| C  | -0.90244700 | 4.44669300  | -2.66367200 |
| H  | -1.66511200 | 5.11873900  | -2.23877200 |
| H  | -1.26343100 | 4.12276700  | -3.65214600 |
| H  | 0.01133900  | 5.04154100  | -2.81284500 |
| C  | -1.94299500 | 2.44875000  | -1.54538200 |
| H  | -1.77372000 | 1.56117500  | -0.91866200 |
| H  | -2.35662900 | 2.10745000  | -2.50648200 |
| H  | -2.69526900 | 3.08192500  | -1.04750800 |
| C  | 3.05599600  | 2.88073500  | 1.74685800  |
| H  | 3.12598900  | 1.85447000  | 1.35528200  |
| C  | 4.24627600  | 3.65773200  | 1.17921700  |



|   |             |             |             |
|---|-------------|-------------|-------------|
| H | 4.19438200  | 4.72017500  | 1.46637400  |
| H | 4.29010300  | 3.60357900  | 0.08337200  |
| H | 5.19255100  | 3.24837400  | 1.56693300  |
| C | 3.14892700  | 2.81316600  | 3.26823400  |
| H | 2.28139800  | 2.29930900  | 3.70784700  |
| H | 3.21377400  | 3.81582900  | 3.71896800  |
| H | 4.05448400  | 2.26909900  | 3.57038500  |
| C | 3.59851100  | -1.70662300 | -0.45417300 |
| C | 2.96091200  | -2.94660700 | -0.70478500 |
| C | 3.40463500  | -4.07167800 | -0.00642100 |
| H | 2.91666300  | -5.03074400 | -0.18030700 |
| C | 4.45359600  | -3.99704300 | 0.90327400  |
| H | 4.78433600  | -4.89291200 | 1.43389400  |
| C | 5.07110100  | -2.77782500 | 1.13680600  |
| H | 5.89065400  | -2.71919600 | 1.85721600  |
| C | 4.65473900  | -1.61393400 | 0.48141200  |
| C | 1.85821500  | -3.07553300 | -1.73848200 |
| H | 1.19446200  | -2.20350100 | -1.63517800 |
| C | 2.42438600  | -3.02097400 | -3.15819800 |
| H | 3.11135000  | -3.86393100 | -3.33752100 |
| H | 2.96712600  | -2.08645800 | -3.34776700 |
| H | 1.60704000  | -3.07714800 | -3.89265900 |
| C | 0.97828200  | -4.30541000 | -1.55851600 |
| H | 1.53921600  | -5.24218600 | -1.70679500 |
| H | 0.17782200  | -4.28921700 | -2.31171400 |
| H | 0.49205300  | -4.31259900 | -0.57211700 |
| C | 5.35616000  | -0.31036200 | 0.82327400  |
| H | 4.83881500  | 0.50611200  | 0.29686000  |
| C | 6.81797700  | -0.31643900 | 0.36976400  |
| H | 7.39836000  | -1.06714100 | 0.92938500  |
| H | 7.28388600  | 0.66526300  | 0.54963400  |
| H | 6.92055900  | -0.55289300 | -0.69733000 |
| C | 5.28517900  | -0.01111600 | 2.32084900  |
| H | 4.24982000  | -0.00367800 | 2.68820100  |
| H | 5.73402800  | 0.97039400  | 2.53777800  |
| H | 5.83903400  | -0.76073800 | 2.90657800  |
| C | -4.01608800 | -0.46489700 | 0.15709300  |
| C | -5.31793400 | 0.11285500  | -0.26507700 |
| C | -6.50321100 | -0.54417100 | 0.08060900  |
| H | -6.45643800 | -1.48672200 | 0.63004900  |
| C | -7.73424800 | 0.00935300  | -0.26037000 |
| H | -8.65571500 | -0.50975800 | 0.01279100  |
| C | -7.79045400 | 1.22460800  | -0.94177100 |
| H | -8.75701400 | 1.65967400  | -1.20613600 |
| C | -6.61032300 | 1.88283100  | -1.28409900 |
| H | -6.64790300 | 2.83473300  | -1.81856700 |
| C | -5.37653800 | 1.32974400  | -0.94906600 |
| H | -4.45233200 | 1.83875000  | -1.22233600 |
| C | -3.51892400 | -1.98073200 | -1.83008100 |
| C | -4.68979600 | -2.95510500 | -1.67024900 |
| H | -4.48600100 | -3.66685600 | -0.85586700 |
| H | -4.83208900 | -3.52980400 | -2.59797800 |
| H | -5.63158000 | -2.43109800 | -1.45537500 |
| C | -3.81234000 | -0.95651200 | -2.92920000 |
| H | -4.74868900 | -0.40963700 | -2.75718300 |
| H | -3.90148400 | -1.47425300 | -3.89599100 |
| H | -2.98201300 | -0.23895100 | -3.00179000 |
| C | -2.27142600 | -2.76452700 | -2.22951300 |
| H | -2.00517600 | -3.50411500 | -1.46504600 |
| H | -1.41563700 | -2.08652000 | -2.35696500 |
| H | -2.45624300 | -3.27255100 | -3.18763000 |
| C | -3.67294400 | 0.66873500  | 2.41084000  |
| C | -5.15127900 | 0.85014900  | 2.75967400  |
| H | -5.62932100 | -0.11980200 | 2.96334400  |
| H | -5.71289400 | 1.35368800  | 1.96195300  |
| H | -5.23291400 | 1.46771900  | 3.66683600  |
| C | -2.94118000 | 0.10249700  | 3.62888200  |
| H | -3.04256700 | 0.78280200  | 4.48689600  |
| H | -1.87328000 | -0.01715800 | 3.40119200  |

|   |             |             |            |
|---|-------------|-------------|------------|
| H | -3.34963100 | -0.88044300 | 3.90742900 |
| C | -3.04915900 | 2.01237600  | 2.01977500 |
| H | -3.10062900 | 2.72344900  | 2.85868300 |
| H | -3.58396800 | 2.45477600  | 1.16625700 |
| H | -1.99655100 | 1.87312100  | 1.73628800 |
| C | 0.52823500  | -0.65213100 | 0.93581700 |
| H | 0.70263300  | -1.73872500 | 0.83217300 |
| C | 1.27763400  | -0.14783300 | 2.16019300 |
| H | 1.01986000  | 0.91312200  | 2.31504500 |
| H | 2.35441400  | -0.17378700 | 1.92235700 |
| C | 1.04949600  | -0.92959100 | 3.44327400 |
| H | -0.00380400 | -0.89511800 | 3.75611100 |
| H | 1.32837100  | -1.98716300 | 3.31478700 |
| H | 1.65164500  | -0.51990600 | 4.26977400 |
| C | -2.19864900 | -3.17781300 | 1.67632500 |
| O | -1.22762700 | -3.01160800 | 0.57754700 |
| H | -3.01675200 | -3.86071700 | 1.37555500 |
| C | -1.58205200 | -3.62555500 | 2.97877600 |
| H | -0.89715300 | -2.85446800 | 3.36252300 |
| H | -2.38971000 | -3.71797200 | 3.72665700 |
| C | -0.83034700 | -4.94254600 | 2.84272800 |
| H | -0.37013400 | -5.25179600 | 3.79425700 |
| H | -1.50002100 | -5.75282100 | 2.51085400 |
| H | -0.03234300 | -4.84472900 | 2.09099100 |

Cartesian coordinates of the optimized geometry of Int-3 at PBE0-D3BJ/def2-SVP level of theory:

|    |             |             |             |
|----|-------------|-------------|-------------|
| Ga | -2.05399900 | 0.19525400  | -0.50873600 |
| Cl | -1.03368400 | -0.05409600 | -2.49232400 |
| Si | 1.86520500  | -0.21696800 | 0.61275800  |
| O  | 0.22417200  | -0.42417100 | 1.01666800  |
| N  | -3.37502200 | -1.26578400 | -0.59281000 |
| N  | -3.35863500 | 1.63276700  | -0.84003100 |
| N  | 2.70057800  | -1.16616100 | -0.77297400 |
| N  | 2.17066600  | -2.14013600 | 1.08012100  |
| C  | -4.46953800 | -1.10868500 | -1.33866500 |
| C  | -4.86525200 | 0.10718700  | -1.92223800 |
| H  | -5.73195400 | 0.05299100  | -2.57919500 |
| C  | -4.39698400 | 1.39822800  | -1.63728700 |
| C  | -5.36969800 | -2.28877000 | -1.57887200 |
| H  | -6.33090800 | -1.96606500 | -1.99519200 |
| H  | -5.54500400 | -2.84993100 | -0.65055100 |
| H  | -4.90176000 | -2.98981500 | -2.28438500 |
| C  | -5.11202600 | 2.55259000  | -2.27935100 |
| H  | -5.16184900 | 3.42631300  | -1.61689200 |
| H  | -6.12343600 | 2.27220000  | -2.59732800 |
| H  | -4.54374100 | 2.85859300  | -3.17278400 |
| C  | -3.11994900 | -2.53904000 | 0.00333000  |
| C  | -2.60570700 | -3.60319900 | -0.76768300 |
| C  | -2.46743400 | -4.85349800 | -0.15645100 |
| H  | -2.07974200 | -5.69102400 | -0.74127600 |
| C  | -2.79654700 | -5.04783300 | 1.17807800  |
| H  | -2.68169600 | -6.03407700 | 1.63392800  |
| C  | -3.24474200 | -3.97494600 | 1.94045500  |
| H  | -3.47362600 | -4.12542500 | 2.99683800  |
| C  | -3.41101200 | -2.70877100 | 1.37448800  |
| C  | -2.15032700 | -3.42910600 | -2.20439300 |
| H  | -2.45124500 | -2.42712000 | -2.54301200 |
| C  | -2.75228800 | -4.46477400 | -3.15389000 |
| H  | -2.38740800 | -5.48040200 | -2.93312200 |
| H  | -2.47023600 | -4.23584700 | -4.19298500 |
| H  | -3.85113900 | -4.49567400 | -3.10218000 |
| C  | -0.62358300 | -3.47461800 | -2.27633600 |
| H  | -0.16756200 | -2.71436000 | -1.62750100 |
| H  | -0.28042200 | -3.28315300 | -3.30458400 |
| H  | -0.25631900 | -4.46754800 | -1.96903700 |
| C  | -3.93202100 | -1.55245000 | 2.20487500  |

|   |             |             |             |
|---|-------------|-------------|-------------|
| H | -3.49250800 | -0.63647500 | 1.77948300  |
| C | -5.45122500 | -1.41662400 | 2.08928200  |
| H | -5.95187000 | -2.33934200 | 2.42350200  |
| H | -5.76698800 | -1.21140000 | 1.05671100  |
| H | -5.81502300 | -0.58817800 | 2.71694100  |
| C | -3.50057400 | -1.62144200 | 3.66591900  |
| H | -2.41644500 | -1.78506300 | 3.75827800  |
| H | -4.01520800 | -2.42898300 | 4.21022700  |
| H | -3.74716700 | -0.67868400 | 4.17711700  |
| C | -3.11054300 | 2.93789300  | -0.31960300 |
| C | -2.25192700 | 3.82962000  | -0.98997600 |
| C | -2.00137600 | 5.07457000  | -0.40162500 |
| H | -1.33231200 | 5.77604300  | -0.90621600 |
| C | -2.58397300 | 5.43246700  | 0.80619300  |
| H | -2.37334200 | 6.40859800  | 1.24929900  |
| C | -3.43176700 | 4.54070900  | 1.45661700  |
| H | -3.87879600 | 4.82624700  | 2.41055800  |
| C | -3.70620800 | 3.28240300  | 0.91747700  |
| C | -1.60516600 | 3.48732000  | -2.31730000 |
| H | -1.95944600 | 2.49161200  | -2.62057100 |
| C | -2.00112200 | 4.48291800  | -3.40857400 |
| H | -1.60394800 | 5.48961800  | -3.20180000 |
| H | -3.09368100 | 4.57453300  | -3.50381800 |
| H | -1.59888100 | 4.16324100  | -4.38240900 |
| C | -0.08559700 | 3.39894700  | -2.19042900 |
| H | 0.34606200  | 4.37077800  | -1.90523700 |
| H | 0.36281100  | 3.09434300  | -3.14841000 |
| H | 0.21788800  | 2.65746300  | -1.43779100 |
| C | -4.62836800 | 2.31418300  | 1.63953200  |
| H | -4.30152900 | 1.30029900  | 1.35868400  |
| C | -6.08051900 | 2.46211000  | 1.17906600  |
| H | -6.44619000 | 3.48415100  | 1.36813000  |
| H | -6.73093200 | 1.76185000  | 1.72630900  |
| H | -6.20005100 | 2.25247800  | 0.10834000  |
| C | -4.55213800 | 2.42358600  | 3.15998700  |
| H | -3.51659600 | 2.37205800  | 3.52543000  |
| H | -5.11761400 | 1.60143900  | 3.62478400  |
| H | -4.99627500 | 3.36239200  | 3.52639600  |
| C | 2.77856600  | -2.31041700 | -0.07506600 |
| C | 3.50510700  | -3.53958700 | -0.49433000 |
| C | 4.81257700  | -3.73148300 | -0.03456500 |
| H | 5.27324100  | -2.97444000 | 0.60395600  |
| C | 5.51469400  | -4.88413500 | -0.37579000 |
| H | 6.53522800  | -5.02446600 | -0.01234800 |
| C | 4.91402200  | -5.85866000 | -1.17194400 |
| H | 5.46306400  | -6.76558200 | -1.43561700 |
| C | 3.61126300  | -5.67132500 | -1.63114500 |
| H | 3.13597200  | -6.42960000 | -2.25759500 |
| C | 2.90971500  | -4.51476900 | -1.29843900 |
| H | 1.89594800  | -4.36149000 | -1.66931600 |
| C | 3.36854100  | -0.78521400 | -2.02949400 |
| C | 4.88524700  | -0.69345400 | -1.83186000 |
| H | 5.12214200  | 0.03887800  | -1.04577200 |
| H | 5.36602100  | -0.35741800 | -2.76394100 |
| H | 5.31936700  | -1.66784100 | -1.56647700 |
| C | 3.02711300  | -1.77260400 | -3.14946400 |
| H | 3.47840300  | -2.76009500 | -2.99185200 |
| H | 3.40589600  | -1.38424100 | -4.10679900 |
| H | 1.93585900  | -1.88447100 | -3.23276200 |
| C | 2.84375400  | 0.58895100  | -2.44890900 |
| H | 3.12356600  | 1.35796200  | -1.71889700 |
| H | 1.74932700  | 0.57890900  | -2.55168700 |
| H | 3.28731900  | 0.85502800  | -3.42039500 |
| C | 1.63082300  | -3.16011900 | 1.99121900  |
| C | 2.69983100  | -4.14190000 | 2.48206300  |
| H | 3.56390100  | -3.60430700 | 2.90200500  |
| H | 3.06010500  | -4.80702700 | 1.68672500  |
| H | 2.27526600  | -4.77302600 | 3.27761700  |
| C | 1.02167800  | -2.45611600 | 3.20595700  |

|   |             |             |             |
|---|-------------|-------------|-------------|
| H | 0.50708700  | -3.19895100 | 3.83336300  |
| H | 0.29629600  | -1.70198700 | 2.87574100  |
| H | 1.78793000  | -1.96819600 | 3.82075500  |
| C | 0.50367600  | -3.91177100 | 1.28031500  |
| H | 0.02889500  | -4.63200900 | 1.96252100  |
| H | 0.87617000  | -4.46982700 | 0.41039200  |
| H | -0.26460100 | -3.20280800 | 0.94208600  |
| C | -0.71416500 | 0.62485900  | 0.89507600  |
| H | -0.21329600 | 1.50422100  | 0.43794000  |
| C | -1.21854100 | 1.07652900  | 2.25586100  |
| H | -1.81761400 | 0.28326600  | 2.73036900  |
| H | -1.89810500 | 1.92571500  | 2.08463700  |
| C | -0.10528100 | 1.50191700  | 3.20209900  |
| H | 0.52167500  | 0.64496600  | 3.48703000  |
| H | 0.55839700  | 2.24827000  | 2.73885600  |
| H | -0.51501500 | 1.93468000  | 4.12815400  |
| C | 3.27336900  | 0.45310900  | 1.77005900  |
| O | 3.10806500  | 1.86686700  | 1.90521500  |
| H | 4.17427800  | 0.26875300  | 1.15102300  |
| C | 3.55123400  | -0.11989600 | 3.14676600  |
| H | 2.67810000  | 0.04897900  | 3.79788700  |
| H | 3.66189200  | -1.20908500 | 3.03960800  |
| C | 4.79268900  | 0.47113000  | 3.79843100  |
| H | 4.98555600  | 0.02019200  | 4.78425500  |
| H | 5.68566300  | 0.30724700  | 3.17229200  |
| H | 4.68095500  | 1.55623600  | 3.94050700  |
| H | 1.66151100  | 1.09225800  | -0.11531400 |
| C | 4.24403400  | 4.62291000  | 0.00013300  |
| C | 5.28563800  | 3.50734600  | -0.36730700 |
| O | 4.61795200  | 2.32085300  | 0.08288300  |
| O | 3.60440900  | 4.07327800  | 1.15750100  |
| C | 5.58974300  | 3.38057900  | -1.84758800 |
| H | 6.02905400  | 4.31215600  | -2.23530000 |
| H | 6.31376000  | 2.56848200  | -2.00919000 |
| H | 4.68822500  | 3.14697600  | -2.42709900 |
| C | 6.57811300  | 3.62360100  | 0.43284200  |
| H | 6.36752300  | 3.74100300  | 1.50616000  |
| H | 7.16071100  | 2.70065200  | 0.29932200  |
| H | 7.19179300  | 4.47337500  | 0.10101900  |
| C | 3.17140600  | 4.79151600  | -1.06914700 |
| H | 2.35810200  | 5.40386300  | -0.65417500 |
| H | 3.55937600  | 5.28712000  | -1.97070900 |
| H | 2.74452600  | 3.81976900  | -1.35611400 |
| C | 4.85133000  | 5.96517800  | 0.35956900  |
| H | 5.42930500  | 6.37295300  | -0.48361900 |
| H | 4.04995300  | 6.67823500  | 0.60149700  |
| H | 5.50791500  | 5.88739600  | 1.23548100  |
| B | 3.74037200  | 2.71053300  | 1.07494600  |

Cartesian coordinates of the optimized geometry of Int-4 at PBE0-D3BJ/def2-SVP level of theory:

|    |             |             |             |
|----|-------------|-------------|-------------|
| Ga | -2.01529100 | -0.35284100 | -0.70177800 |
| Cl | -1.05437400 | -0.74990900 | -2.67619400 |
| Si | 2.00158800  | -0.68370800 | 0.69437600  |
| O  | 0.38638200  | -0.81925400 | 0.60859100  |
| N  | -3.25996300 | -1.87585100 | -0.57096300 |
| N  | -3.38414300 | 0.97109200  | -1.15372400 |
| N  | 2.84118800  | -1.26703700 | -0.82857600 |
| N  | 2.64587000  | -2.38331500 | 1.00549200  |
| C  | -4.26496300 | -1.90932400 | -1.44685200 |
| C  | -4.72937700 | -0.77809400 | -2.13607100 |
| H  | -5.53505400 | -0.95767800 | -2.84645700 |
| C  | -4.39803700 | 0.57235300  | -1.92063400 |
| C  | -4.92938100 | -3.22032200 | -1.75858100 |
| H  | -5.96056700 | -3.07534800 | -2.10313800 |
| H  | -4.91909800 | -3.90500000 | -0.90127800 |
| H  | -4.36589000 | -3.70749800 | -2.57129900 |

|   |             |             |             |
|---|-------------|-------------|-------------|
| C | -5.24209100 | 1.60751300  | -2.60642200 |
| H | -5.55358600 | 2.39650200  | -1.90804700 |
| H | -6.12873700 | 1.15594200  | -3.06607800 |
| H | -4.64914300 | 2.10374000  | -3.39008000 |
| C | -2.97549800 | -2.98355400 | 0.28510500  |
| C | -2.06521800 | -3.98388100 | -0.11063800 |
| C | -1.74689400 | -4.99503900 | 0.80323900  |
| H | -1.03677600 | -5.77251200 | 0.50979600  |
| C | -2.32067100 | -5.03393200 | 2.06644800  |
| H | -2.05864200 | -5.83120600 | 2.76604000  |
| C | -3.23829300 | -4.05532000 | 2.43535200  |
| H | -3.69184300 | -4.09414600 | 3.42720600  |
| C | -3.58060800 | -3.01878500 | 1.56422500  |
| C | -1.43600200 | -4.00884100 | -1.48792400 |
| H | -1.84285800 | -3.16504000 | -2.06175500 |
| C | -1.77071700 | -5.29748800 | -2.23900800 |
| H | -1.32213200 | -6.17967200 | -1.75449900 |
| H | -1.38215200 | -5.25204100 | -3.26832400 |
| H | -2.85624500 | -5.46894200 | -2.29217200 |
| C | 0.07350400  | -3.79527500 | -1.41098700 |
| H | 0.31700200  | -2.87193600 | -0.86825400 |
| H | 0.49761700  | -3.71189100 | -2.42351000 |
| H | 0.56329600  | -4.64047900 | -0.89984700 |
| C | -4.59314200 | -1.96836500 | 1.98088900  |
| H | -4.33802100 | -1.05071100 | 1.42966900  |
| C | -6.01276100 | -2.36137000 | 1.56519600  |
| H | -6.30614100 | -3.31485400 | 2.03297600  |
| H | -6.10928700 | -2.47510400 | 0.47777700  |
| H | -6.73337400 | -1.59141200 | 1.88218100  |
| C | -4.55550900 | -1.64650500 | 3.47154700  |
| H | -3.54054900 | -1.39813800 | 3.81381000  |
| H | -4.92485800 | -2.48526300 | 4.08207700  |
| H | -5.20784200 | -0.78695700 | 3.68668300  |
| C | -3.23747500 | 2.35917700  | -0.83351800 |
| C | -2.54958300 | 3.22959400  | -1.70198000 |
| C | -2.47855700 | 4.58398600  | -1.35890300 |
| H | -1.94034800 | 5.26947700  | -2.01713400 |
| C | -3.05810300 | 5.06694500  | -0.19421900 |
| H | -2.98925300 | 6.12855500  | 0.05393300  |
| C | -3.69910400 | 4.18836300  | 0.67248600  |
| H | -4.12517800 | 4.56771200  | 1.60297000  |
| C | -3.79116900 | 2.82634300  | 0.37919200  |
| C | -1.82772700 | 2.74165200  | -2.94007400 |
| H | -2.11154300 | 1.69298500  | -3.11142700 |
| C | -2.19626000 | 3.53518200  | -4.19238100 |
| H | -1.85661600 | 4.58090100  | -4.12932000 |
| H | -3.28324200 | 3.55058800  | -4.36960100 |
| H | -1.71519100 | 3.09001500  | -5.07672300 |
| C | -0.31828900 | 2.76711800  | -2.69756000 |
| H | 0.05365900  | 3.78959000  | -2.53322100 |
| H | 0.21871400  | 2.34076400  | -3.55787400 |
| H | -0.03158500 | 2.18900900  | -1.80946400 |
| C | -4.47584900 | 1.87793500  | 1.34373300  |
| H | -4.03651300 | 0.88488400  | 1.16316300  |
| C | -5.97432600 | 1.75281800  | 1.06600700  |
| H | -6.47027700 | 2.73317400  | 1.14785200  |
| H | -6.44733500 | 1.07263500  | 1.79222500  |
| H | -6.17345400 | 1.35353700  | 0.06161000  |
| C | -4.22090600 | 2.23694300  | 2.80475800  |
| H | -3.15050600 | 2.39639100  | 3.00070800  |
| H | -4.57419200 | 1.42981100  | 3.46341600  |
| H | -4.75549600 | 3.15257700  | 3.10177300  |
| C | 3.24208100  | -2.36766600 | -0.19114100 |
| C | 4.21877700  | -3.36878000 | -0.67880300 |
| C | 5.55094900  | -3.28355400 | -0.26442800 |
| H | 5.86677300  | -2.46463800 | 0.38547000  |
| C | 6.47269600  | -4.23666700 | -0.69229900 |
| H | 7.51417400  | -4.16399800 | -0.37179800 |
| C | 6.06620800  | -5.27630800 | -1.52673100 |

|   |             |             |             |
|---|-------------|-------------|-------------|
| H | 6.78955100  | -6.02435200 | -1.85897600 |
| C | 4.73672700  | -5.35907900 | -1.94089400 |
| H | 4.41612400  | -6.17102500 | -2.59714900 |
| C | 3.81264800  | -4.40655500 | -1.52276800 |
| H | 2.77162300  | -4.46594700 | -1.84305500 |
| C | 3.32335800  | -0.64228500 | -2.07920000 |
| C | 4.74988300  | -0.13183000 | -1.87559000 |
| H | 4.76954000  | 0.57873400  | -1.03639400 |
| H | 5.08571100  | 0.40002000  | -2.77802200 |
| H | 5.45382900  | -0.95717000 | -1.69046100 |
| C | 3.24375400  | -1.63243900 | -3.24087300 |
| H | 3.97113400  | -2.45019300 | -3.15519600 |
| H | 3.45753200  | -1.09503400 | -4.17598000 |
| H | 2.22931300  | -2.05167600 | -3.31732000 |
| C | 2.38576200  | 0.52498800  | -2.35868600 |
| H | 2.44935600  | 1.29711900  | -1.57753600 |
| H | 1.35085400  | 0.17104900  | -2.46017300 |
| H | 2.67402800  | 1.00848000  | -3.30343200 |
| C | 2.66922400  | -3.35071800 | 2.10903100  |
| C | 3.89441900  | -3.09462700 | 2.99056000  |
| H | 3.91006800  | -2.05362100 | 3.34642200  |
| H | 4.82474100  | -3.28697000 | 2.43690100  |
| H | 3.87960100  | -3.75715500 | 3.86900900  |
| C | 1.39019200  | -3.11518700 | 2.91046600  |
| H | 1.33956500  | -3.81692200 | 3.75505400  |
| H | 0.49851200  | -3.25377500 | 2.28198200  |
| H | 1.36552900  | -2.09696400 | 3.32318000  |
| C | 2.67081900  | -4.79594800 | 1.61028200  |
| H | 2.52902900  | -5.46721600 | 2.46976800  |
| H | 3.61327000  | -5.07401300 | 1.12224300  |
| H | 1.84336300  | -4.96545600 | 0.90646100  |
| C | -0.77705500 | -0.00910800 | 0.81595900  |
| H | -0.46310700 | 1.04437200  | 0.79492000  |
| C | -1.39940400 | -0.34210100 | 2.16265100  |
| H | -1.61008900 | -1.42313300 | 2.19724100  |
| H | -2.37941100 | 0.15891900  | 2.20992600  |
| C | -0.58205800 | 0.06293200  | 3.37764300  |
| H | 0.42189200  | -0.38023400 | 3.35609200  |
| H | -0.44649600 | 1.15118700  | 3.42945700  |
| H | -1.06616700 | -0.26847800 | 4.30943100  |
| C | 3.15424200  | 0.60572200  | 1.47499900  |
| O | 3.31950200  | 1.65372200  | 0.60182000  |
| H | 4.08779200  | -0.00806400 | 1.42988800  |
| C | 2.93981500  | 0.95453700  | 2.94501700  |
| H | 1.99344000  | 1.50414400  | 3.03548800  |
| H | 2.82745500  | 0.01443100  | 3.51787100  |
| C | 4.08156500  | 1.78681200  | 3.50749200  |
| H | 3.91405300  | 2.01476400  | 4.57149800  |
| H | 5.04522100  | 1.25658400  | 3.42285400  |
| H | 4.15043200  | 2.73486700  | 2.95421000  |
| H | -0.70700800 | 3.11889200  | 0.38654000  |
| C | 3.45944800  | 4.35114800  | -0.93829900 |
| C | 3.56900200  | 4.97448400  | 0.51265000  |
| O | 3.07627800  | 3.95727800  | 1.34713400  |
| O | 2.43674100  | 3.40049700  | -0.79459400 |
| C | 4.99325000  | 5.32333200  | 0.93449500  |
| H | 5.44810800  | 6.06879500  | 0.26277300  |
| H | 4.97768900  | 5.74546900  | 1.95107000  |
| H | 5.63002600  | 4.42958400  | 0.95408100  |
| C | 2.70045400  | 6.22303200  | 0.68443700  |
| H | 1.66419800  | 6.03735100  | 0.36990700  |
| H | 2.68403700  | 6.49366300  | 1.75080600  |
| H | 3.08756300  | 7.08303500  | 0.11694500  |
| C | 4.74954800  | 3.64516600  | -1.36714400 |
| H | 4.54901600  | 3.08836200  | -2.29502000 |
| H | 5.57049100  | 4.35245500  | -1.55930100 |
| H | 5.06579300  | 2.92296800  | -0.60310100 |
| C | 3.05793400  | 5.34090700  | -2.02388500 |
| H | 3.79319200  | 6.15445200  | -2.12563800 |

|   |             |            |             |
|---|-------------|------------|-------------|
| H | 2.99399500  | 4.81478900 | -2.98878200 |
| H | 2.07269300  | 5.77928100 | -1.81689500 |
| B | 2.46198300  | 2.88358000 | 0.56543300  |
| C | 0.14180000  | 3.47001200 | 1.00369400  |
| H | 0.51542500  | 4.37719600 | 0.50084800  |
| O | 1.13721700  | 2.48688100 | 1.03053000  |
| C | -0.39892200 | 3.82443000 | 2.38215700  |
| H | -1.21720000 | 4.55089200 | 2.23718600  |
| H | -0.87891800 | 2.92692300 | 2.80930000  |
| C | 0.62394100  | 4.37163500 | 3.36180700  |
| H | 0.17601600  | 4.53983000 | 4.35432200  |
| H | 1.47613700  | 3.68665300 | 3.46989800  |
| H | 1.04208800  | 5.32445100 | 3.00721800  |

Cartesian coordinates of the optimized geometry of Int-5 at PBE0-D3BJ/def2-SVP level of theory:

|    |             |             |             |
|----|-------------|-------------|-------------|
| Ga | -1.82649500 | -0.72898800 | -0.69237300 |
| Cl | -0.85060900 | -1.10095300 | -2.67346100 |
| Si | 2.15782300  | -0.09271200 | 0.60077700  |
| O  | 0.60807000  | -0.62519200 | 0.71650100  |
| N  | -2.73170900 | -2.46372000 | -0.37770400 |
| N  | -3.47164900 | 0.21779300  | -1.22008400 |
| N  | 3.09606000  | -0.57208800 | -0.89038100 |
| N  | 3.01093000  | -1.77248900 | 0.89424800  |
| C  | -3.71149700 | -2.79706500 | -1.21617700 |
| C  | -4.39414700 | -1.86826400 | -2.01878100 |
| H  | -5.13746000 | -2.28729600 | -2.69533300 |
| C  | -4.36033400 | -0.46631800 | -1.94416600 |
| C  | -4.11276000 | -4.23837000 | -1.35935800 |
| H  | -5.15682800 | -4.33008400 | -1.68289600 |
| H  | -3.96223200 | -4.80612900 | -0.43280500 |
| H  | -3.47745300 | -4.70099000 | -2.13208500 |
| C  | -5.39305900 | 0.28643800  | -2.73432700 |
| H  | -5.91284900 | 1.02973100  | -2.11439500 |
| H  | -6.12836400 | -0.39633400 | -3.17535200 |
| H  | -4.89936500 | 0.84810100  | -3.54212400 |
| C  | -2.21179200 | -3.40999700 | 0.55890700  |
| C  | -1.15924600 | -4.27239200 | 0.19446300  |
| C  | -0.63467100 | -5.13331900 | 1.16481400  |
| H  | 0.18706600  | -5.80155600 | 0.89486600  |
| C  | -1.13889400 | -5.15632900 | 2.45750300  |
| H  | -0.71332000 | -5.83242600 | 3.20277200  |
| C  | -2.19446700 | -4.31692900 | 2.79840500  |
| H  | -2.59316100 | -4.34467200 | 3.81377800  |
| C  | -2.74985700 | -3.43631800 | 1.86731000  |
| C  | -0.58142800 | -4.29796000 | -1.20465800 |
| H  | -1.16062600 | -3.60155400 | -1.82648900 |
| C  | -0.66992000 | -5.68694700 | -1.83640300 |
| H  | -0.03681100 | -6.41611100 | -1.30579700 |
| H  | -0.32790300 | -5.65301500 | -2.88254500 |
| H  | -1.69830100 | -6.07794100 | -1.82670000 |
| C  | 0.85643000  | -3.78972500 | -1.20324700 |
| H  | 0.92851300  | -2.79819800 | -0.73565600 |
| H  | 1.23527500  | -3.71244500 | -2.23363200 |
| H  | 1.51053700  | -4.47881400 | -0.64493100 |
| C  | -3.92653700 | -2.55785400 | 2.24883600  |
| H  | -3.85322900 | -1.65067800 | 1.63111700  |
| C  | -5.25905800 | -3.22869600 | 1.90713800  |
| H  | -5.36009300 | -4.18903500 | 2.43772100  |
| H  | -5.36042900 | -3.42379900 | 0.83163200  |
| H  | -6.10126300 | -2.58543200 | 2.20640700  |
| C  | -3.91556200 | -2.12952900 | 3.71259300  |
| H  | -2.95602000 | -1.67666800 | 4.00101100  |
| H  | -4.11115400 | -2.97599200 | 4.38941800  |
| H  | -4.70879600 | -1.38912000 | 3.89358400  |
| C  | -3.68434700 | 1.62092800  | -1.02554500 |
| C  | -3.21291500 | 2.55821000  | -1.96649000 |

|   |             |             |             |
|---|-------------|-------------|-------------|
| C | -3.53599900 | 3.90611100  | -1.77891800 |
| H | -3.17551200 | 4.64272200  | -2.50028500 |
| C | -4.28694200 | 4.32561500  | -0.68919100 |
| H | -4.52772600 | 5.38360600  | -0.56207900 |
| C | -4.70606600 | 3.39595700  | 0.25560800  |
| H | -5.27211100 | 3.73266200  | 1.12618800  |
| C | -4.41242800 | 2.03783000  | 0.11105400  |
| C | -2.32084800 | 2.16315900  | -3.12335800 |
| H | -2.32349400 | 1.06610400  | -3.19882700 |
| C | -2.79537900 | 2.72106400  | -4.46353900 |
| H | -2.72808700 | 3.81984100  | -4.49915500 |
| H | -3.83952400 | 2.44588000  | -4.68035100 |
| H | -2.16690100 | 2.33023000  | -5.27835300 |
| C | -0.88372000 | 2.59199400  | -2.82655100 |
| H | -0.79387600 | 3.68666200  | -2.75082000 |
| H | -0.20523100 | 2.24644400  | -3.62011800 |
| H | -0.51988100 | 2.18347800  | -1.87420200 |
| C | -4.89826500 | 1.04008100  | 1.14424200  |
| H | -4.24578700 | 0.15874600  | 1.05586800  |
| C | -6.32401700 | 0.56622200  | 0.85776900  |
| H | -7.02418200 | 1.41686200  | 0.84296900  |
| H | -6.66148600 | -0.13610800 | 1.63632700  |
| H | -6.39773600 | 0.04766800  | -0.10831000 |
| C | -4.77990100 | 1.56663500  | 2.57168700  |
| H | -3.77355100 | 1.96041500  | 2.77617800  |
| H | -4.98496700 | 0.76197300  | 3.29313000  |
| H | -5.50223000 | 2.37269400  | 2.77364200  |
| C | 3.61418300  | -1.65069200 | -0.27100400 |
| C | 4.74920600  | -2.47394300 | -0.75989000 |
| C | 6.05111800  | -2.03296200 | -0.50262400 |
| H | 6.20759100  | -1.08396600 | 0.01501200  |
| C | 7.14127500  | -2.80031600 | -0.90719200 |
| H | 8.15542000  | -2.45086700 | -0.70139300 |
| C | 6.93671000  | -4.00663900 | -1.57449100 |
| H | 7.79171500  | -4.60708300 | -1.89341400 |
| C | 5.63878200  | -4.44495600 | -1.83555900 |
| H | 5.47373300  | -5.38897300 | -2.35950200 |
| C | 4.54638200  | -3.68450300 | -1.42824300 |
| H | 3.53058700  | -4.02881800 | -1.62424100 |
| C | 3.27747900  | -0.10474300 | -2.27776300 |
| C | 4.68136600  | 0.47565400  | -2.46083600 |
| H | 4.88585000  | 1.24402900  | -1.70316200 |
| H | 4.76615400  | 0.94550600  | -3.45209800 |
| H | 5.45365200  | -0.30366800 | -2.39245700 |
| C | 3.04024500  | -1.24489200 | -3.27077300 |
| H | 3.80458200  | -2.03000800 | -3.20176300 |
| H | 3.07255900  | -0.84083800 | -4.29343200 |
| H | 2.04427300  | -1.68284700 | -3.11357400 |
| C | 2.21581600  | 0.95991400  | -2.52671400 |
| H | 2.28030600  | 1.80243900  | -1.82934000 |
| H | 1.21551300  | 0.51358300  | -2.44446300 |
| H | 2.32274600  | 1.35109400  | -3.54914900 |
| C | 3.29972300  | -2.58227800 | 2.07816100  |
| C | 4.46565900  | -1.95892500 | 2.85336100  |
| H | 4.24780300  | -0.91257500 | 3.11167500  |
| H | 5.39090100  | -1.98655300 | 2.25870800  |
| H | 4.64581000  | -2.51334800 | 3.78693400  |
| C | 2.02959400  | -2.55075300 | 2.92953500  |
| H | 2.17371300  | -3.13903600 | 3.84736400  |
| H | 1.17437000  | -2.96001900 | 2.37320800  |
| H | 1.77710600  | -1.52118100 | 3.22032800  |
| C | 3.62306200  | -4.03621800 | 1.73345000  |
| H | 3.67951700  | -4.61986700 | 2.66414300  |
| H | 4.58410500  | -4.14150400 | 1.21418400  |
| H | 2.83235700  | -4.47230800 | 1.10660600  |
| C | -0.66580700 | 0.02222700  | 0.73352300  |
| H | -0.52913300 | 1.10214600  | 0.55549900  |
| C | -1.32561100 | -0.16466300 | 2.09168000  |
| H | -1.41717300 | -1.24262700 | 2.30180200  |



|   |             |            |             |
|---|-------------|------------|-------------|
| H | -2.35467900 | 0.22210200 | 2.00942400  |
| C | -0.63154400 | 0.52871400 | 3.25118800  |
| H | 0.34852700  | 0.07659500 | 3.45320300  |
| H | -0.46801600 | 1.59207900 | 3.02668600  |
| H | -1.22545800 | 0.44768000 | 4.17534600  |
| C | 2.97410000  | 1.22838500 | 1.58047000  |
| O | 2.03937900  | 1.73095100 | 0.55465200  |
| H | 4.00589100  | 1.48707600 | 1.28726500  |
| C | 2.68820100  | 1.59896500 | 3.02721700  |
| H | 1.77524200  | 2.20978000 | 3.04168700  |
| H | 2.45987500  | 0.69221500 | 3.61369600  |
| C | 3.82452100  | 2.35547400 | 3.69335300  |
| H | 3.59176500  | 2.57991700 | 4.74561600  |
| H | 4.76160900  | 1.77364900 | 3.67955400  |
| H | 3.99426500  | 3.30442700 | 3.16750000  |
| H | -1.62093000 | 3.63444800 | 0.05783100  |
| C | 2.72846900  | 4.65765700 | -0.81192000 |
| C | 2.86817400  | 5.09348800 | 0.69484400  |
| O | 2.32599800  | 3.99270000 | 1.39023900  |
| O | 1.60914800  | 3.79785600 | -0.79025700 |
| C | 4.30351500  | 5.32181100 | 1.15197800  |
| H | 4.79083700  | 6.11476900 | 0.56350500  |
| H | 4.30749400  | 5.63461800 | 2.20717000  |
| H | 4.90294800  | 4.40581400 | 1.07140200  |
| C | 2.05390300  | 6.34420900 | 1.02537400  |
| H | 1.01885000  | 6.25429400 | 0.67025400  |
| H | 2.02393400  | 6.46256400 | 2.11825200  |
| H | 2.49473000  | 7.25248000 | 0.58789400  |
| C | 3.95590300  | 3.88555000 | -1.29322200 |
| H | 3.75105200  | 3.46916700 | -2.28907200 |
| H | 4.84653800  | 4.52659600 | -1.36727500 |
| H | 4.17919200  | 3.05111300 | -0.61348900 |
| C | 2.44841100  | 5.79761800 | -1.77959100 |
| H | 3.25809500  | 6.54381200 | -1.76987100 |
| H | 2.36373900  | 5.39696700 | -2.80096700 |
| H | 1.50215000  | 6.29845600 | -1.53788300 |
| B | 1.46586000  | 3.22654700 | 0.51831300  |
| C | -0.86846500 | 3.98557100 | 0.78532400  |
| H | -0.44787100 | 4.91601800 | 0.36261000  |
| O | 0.11772300  | 3.00981100 | 0.93919900  |
| C | -1.56237100 | 4.27132700 | 2.10778300  |
| H | -2.41623400 | 4.94411000 | 1.91620100  |
| H | -2.00031900 | 3.32410100 | 2.46740800  |
| C | -0.64679900 | 4.85328100 | 3.17143900  |
| H | -1.14435900 | 4.90929600 | 4.15214200  |
| H | 0.26315200  | 4.24296000 | 3.27425300  |
| H | -0.32006400 | 5.86978100 | 2.90269300  |

Cartesian coordinates of the optimized geometry of Int-6 at PBE0-D3BJ/def2-SVP level of theory:

|    |             |             |             |
|----|-------------|-------------|-------------|
| Ga | -1.28054100 | -0.07070300 | -0.84786400 |
| Cl | -1.31708600 | -0.18622200 | -3.10277000 |
| Si | 1.02004000  | 0.20645500  | -0.15092400 |
| N  | -2.46291300 | 1.48009200  | -0.51832100 |
| N  | -2.66988900 | -1.39876400 | -0.39182100 |
| C  | -3.73028700 | 1.36952300  | -0.89723400 |
| C  | -4.33341500 | 0.13780400  | -1.22986500 |
| H  | -5.33247500 | 0.19871100  | -1.65878600 |
| C  | -3.87725300 | -1.14595200 | -0.92147200 |
| C  | -4.58773200 | 2.59829000  | -0.99229100 |
| H  | -4.30676900 | 3.17619000  | -1.88578400 |
| H  | -4.43173700 | 3.26062200  | -0.13011000 |
| H  | -5.64890400 | 2.33321200  | -1.06630700 |
| C  | -4.78752100 | -2.29855600 | -1.24092600 |
| H  | -5.81975400 | -1.96364000 | -1.39810200 |
| H  | -4.76854900 | -3.07514200 | -0.46595500 |
| H  | -4.42992600 | -2.76563000 | -2.17351700 |

|   |             |             |             |
|---|-------------|-------------|-------------|
| C | -1.96093400 | 2.74534100  | -0.06915500 |
| C | -1.56850000 | 3.72510100  | -1.00159700 |
| C | -1.13271200 | 4.96172700  | -0.51959100 |
| H | -0.81812900 | 5.72902800  | -1.23088900 |
| C | -1.06677300 | 5.22153700  | 0.84081800  |
| H | -0.71312700 | 6.19143000  | 1.19803700  |
| C | -1.42121000 | 4.23244300  | 1.74983900  |
| H | -1.33949900 | 4.43427500  | 2.81876800  |
| C | -1.86937300 | 2.98263700  | 1.31946400  |
| C | -1.51684100 | 3.44945400  | -2.49005400 |
| H | -1.99536600 | 2.47726900  | -2.67891500 |
| C | -2.23771800 | 4.50255200  | -3.32861100 |
| H | -1.75605500 | 5.48944200  | -3.24431200 |
| H | -3.28982600 | 4.62533400  | -3.02861500 |
| H | -2.22074800 | 4.21978100  | -4.39257200 |
| C | -0.05638800 | 3.31434900  | -2.91925700 |
| H | 0.48430400  | 2.64324400  | -2.24044600 |
| H | 0.45673800  | 4.28879700  | -2.88089000 |
| H | 0.02052000  | 2.91742300  | -3.94294200 |
| C | -2.28391700 | 1.92414300  | 2.32348800  |
| H | -2.00601800 | 0.95015900  | 1.88622400  |
| C | -3.79998200 | 1.92215100  | 2.53636000  |
| H | -4.14347400 | 2.91867000  | 2.85639700  |
| H | -4.08279100 | 1.20301100  | 3.32031600  |
| H | -4.34923400 | 1.64811200  | 1.62530500  |
| C | -1.56396100 | 2.04130800  | 3.66243300  |
| H | -1.90796100 | 2.91636600  | 4.23630400  |
| H | -0.47612100 | 2.12498400  | 3.52225200  |
| H | -1.76609000 | 1.15134800  | 4.27728900  |
| C | -2.43255000 | -2.65559900 | 0.24246000  |
| C | -1.84250700 | -3.71881300 | -0.46876200 |
| C | -1.60846300 | -4.92563800 | 0.19964700  |
| H | -1.14610800 | -5.75393800 | -0.34296900 |
| C | -1.96607100 | -5.09306500 | 1.53009200  |
| H | -1.77823700 | -6.04312600 | 2.03573500  |
| C | -2.56793900 | -4.04391000 | 2.21683600  |
| H | -2.85047300 | -4.18285000 | 3.26166400  |
| C | -2.81163400 | -2.81474600 | 1.59883100  |
| C | -1.47894700 | -3.60126200 | -1.93333700 |
| H | -1.85509300 | -2.63670100 | -2.30264800 |
| C | -2.12530800 | -4.70105900 | -2.77497200 |
| H | -1.72348400 | -5.69717700 | -2.52997200 |
| H | -1.93449200 | -4.52248300 | -3.84440800 |
| H | -3.21496700 | -4.73884500 | -2.62538300 |
| C | 0.03459700  | -3.58490800 | -2.12060600 |
| H | 0.49433700  | -2.74057500 | -1.58721100 |
| H | 0.29010900  | -3.48275800 | -3.18552100 |
| H | 0.48967000  | -4.51836400 | -1.74939900 |
| C | -3.49400500 | -1.69779700 | 2.37079900  |
| H | -3.12486900 | -0.75180300 | 1.94624900  |
| C | -5.01462200 | -1.71592900 | 2.18753300  |
| H | -5.48074400 | -0.93727000 | 2.81090600  |
| H | -5.43165100 | -2.68902500 | 2.49305300  |
| H | -5.31584800 | -1.52421700 | 1.15083500  |
| C | -3.17194300 | -1.71008600 | 3.86309800  |
| H | -3.54740200 | -0.79039300 | 4.33603800  |
| H | -2.09296700 | -1.77337900 | 4.05382200  |
| H | -3.65918000 | -2.55298600 | 4.37802800  |
| N | 1.65174300  | -1.23728000 | 0.82492600  |
| N | 2.22406200  | -0.77286300 | -1.19025200 |
| C | 2.52932700  | -1.53344200 | -0.13266300 |
| C | 3.68658600  | -2.45053300 | -0.00967000 |
| C | 4.85028500  | -1.99336300 | 0.61964100  |
| H | 4.88100000  | -0.97053700 | 1.00201000  |
| C | 5.95276100  | -2.83540500 | 0.73424500  |
| H | 6.86142000  | -2.47407800 | 1.22100400  |
| C | 5.89801200  | -4.13412100 | 0.22778000  |
| H | 6.76413800  | -4.79351200 | 0.32059400  |
| C | 4.73873500  | -4.59054500 | -0.39742300 |

|   |             |             |             |
|---|-------------|-------------|-------------|
| H | 4.69251200  | -5.60766000 | -0.79291200 |
| C | 3.63368600  | -3.75055800 | -0.51951300 |
| H | 2.72008600  | -4.10408400 | -1.00106000 |
| C | 2.97946600  | -0.51253500 | -2.42354100 |
| C | 2.29935800  | 0.67967300  | -3.08831100 |
| H | 2.36738500  | 1.57126800  | -2.44969100 |
| H | 1.23904000  | 0.46337600  | -3.28485600 |
| H | 2.78854800  | 0.91154500  | -4.04546000 |
| C | 4.43907100  | -0.15998100 | -2.12096100 |
| H | 4.49112000  | 0.58251200  | -1.31089900 |
| H | 4.90978700  | 0.26893900  | -3.01807700 |
| H | 5.02478700  | -1.03989900 | -1.82406200 |
| C | 2.90034300  | -1.71605400 | -3.36259200 |
| H | 3.33805500  | -2.61508200 | -2.90630600 |
| H | 3.45682500  | -1.50205800 | -4.28751500 |
| H | 1.85495900  | -1.92247400 | -3.62842400 |
| C | 1.50339500  | -1.74938900 | 2.19063600  |
| C | 2.67840200  | -1.30956600 | 3.06972100  |
| H | 2.87227600  | -0.23556400 | 2.92833700  |
| H | 3.59230300  | -1.86810200 | 2.82633200  |
| H | 2.44374600  | -1.50112900 | 4.12778100  |
| C | 1.35672500  | -3.27090900 | 2.17360100  |
| H | 1.14606600  | -3.63336400 | 3.19094100  |
| H | 2.27417900  | -3.76542800 | 1.82565900  |
| H | 0.52075900  | -3.57273300 | 1.52509200  |
| C | 0.22177500  | -1.12766500 | 2.73335400  |
| H | 0.29857400  | -0.03143700 | 2.75112200  |
| H | 0.04397900  | -1.47791600 | 3.75958900  |
| H | -0.63961000 | -1.41921400 | 2.11572100  |
| H | 0.81094100  | 1.68492200  | 1.81526900  |
| C | 3.61655300  | 2.91873300  | 1.51751400  |
| C | 2.88801500  | 3.77919400  | 0.42313200  |
| B | 1.67301400  | 1.87226400  | 0.92379100  |
| O | 3.05035400  | 1.63418000  | 1.31897100  |
| O | 1.60644800  | 3.18908900  | 0.36085100  |
| C | 3.26821000  | 3.38405700  | 2.93220600  |
| H | 3.62369400  | 2.62879500  | 3.64914200  |
| H | 3.73424800  | 4.34828700  | 3.18386200  |
| H | 2.17850300  | 3.47794500  | 3.05018400  |
| C | 5.12438500  | 2.82546400  | 1.35979000  |
| H | 5.54368900  | 2.20876300  | 2.16953900  |
| H | 5.39790600  | 2.35916700  | 0.40375300  |
| H | 5.59414700  | 3.81995600  | 1.41212700  |
| C | 3.56034700  | 3.65970500  | -0.94338200 |
| H | 3.75206800  | 2.60789800  | -1.19252400 |
| H | 2.88316500  | 4.07255900  | -1.70524400 |
| H | 4.51363200  | 4.20746800  | -0.99193000 |
| C | 2.73035900  | 5.25039700  | 0.77896600  |
| H | 3.70741800  | 5.73532900  | 0.93266600  |
| H | 2.21370900  | 5.77035700  | -0.04175000 |
| H | 2.12218100  | 5.37437500  | 1.68399500  |

Cartesian coordinates of the optimized geometry of Int-7 at PBE0-D3BJ/def2-SVP level of theory:

|    |             |             |             |
|----|-------------|-------------|-------------|
| Ga | -1.81454900 | -0.69431200 | -0.52666600 |
| Cl | -0.95990400 | -0.74543700 | -2.59676100 |
| Si | 2.07308200  | 0.75907700  | 0.52483600  |
| O  | 0.67902500  | -0.17501200 | 0.58005100  |
| N  | -2.41488400 | -2.55055400 | -0.27478800 |
| N  | -3.62375600 | 0.02995600  | -0.88531300 |
| N  | 3.19364600  | 0.52809800  | -0.93268800 |
| N  | 3.13911200  | -1.03864400 | 0.55170600  |
| C  | -3.47301800 | -2.99123000 | -0.95248500 |
| C  | -4.41121200 | -2.14734500 | -1.56651800 |
| H  | -5.21375100 | -2.64942000 | -2.10530100 |
| C  | -4.53435400 | -0.75174000 | -1.45959700 |
| C  | -3.69422500 | -4.47071200 | -1.09828300 |

|   |             |             |             |
|---|-------------|-------------|-------------|
| H | -3.08878600 | -4.83751800 | -1.94226100 |
| H | -4.74634600 | -4.69458500 | -1.31197000 |
| H | -3.37271700 | -5.02577600 | -0.20784800 |
| C | -5.77362800 | -0.14295100 | -2.05472900 |
| H | -6.07714000 | 0.77340300  | -1.53318300 |
| H | -6.60342800 | -0.86037700 | -2.05130800 |
| H | -5.56874000 | 0.13073600  | -3.10175100 |
| C | -1.60695600 | -3.45092000 | 0.48480300  |
| C | -0.55171700 | -4.15705500 | -0.12688300 |
| C | 0.22185400  | -5.00819900 | 0.66944400  |
| H | 1.04229100  | -5.56591300 | 0.21154100  |
| C | -0.02834400 | -5.15230600 | 2.02722000  |
| H | 0.59498300  | -5.81452100 | 2.63256300  |
| C | -1.07123500 | -4.44525800 | 2.61745200  |
| H | -1.25895800 | -4.56132900 | 3.68613900  |
| C | -1.87892500 | -3.58883100 | 1.86576200  |
| C | -0.23064900 | -4.01405800 | -1.60159600 |
| H | -0.99546800 | -3.36530800 | -2.05043100 |
| C | -0.25475800 | -5.35698900 | -2.33106300 |
| H | 0.54619400  | -6.02519000 | -1.97623600 |
| H | -0.10277700 | -5.20732200 | -3.41134000 |
| H | -1.20858500 | -5.88771400 | -2.19150500 |
| C | 1.11143900  | -3.31176600 | -1.80978000 |
| H | 1.18571600  | -2.39345400 | -1.20943800 |
| H | 1.23664100  | -3.03530000 | -2.86775300 |
| H | 1.94288600  | -3.97841200 | -1.53000300 |
| C | -3.04150800 | -2.85281900 | 2.50848200  |
| H | -3.14283700 | -1.89757400 | 1.97072200  |
| C | -4.36161400 | -3.60661200 | 2.32916200  |
| H | -4.30134500 | -4.61178200 | 2.77628700  |
| H | -4.63549200 | -3.72001900 | 1.27227800  |
| H | -5.18238700 | -3.06385200 | 2.82443700  |
| C | -2.82150300 | -2.53526700 | 3.98406500  |
| H | -1.85174200 | -2.04911900 | 4.16060900  |
| H | -2.86802700 | -3.44164500 | 4.60833100  |
| H | -3.61098100 | -1.85791200 | 4.34404000  |
| C | -3.87650400 | 1.42100400  | -0.68321800 |
| C | -3.65795300 | 2.35420400  | -1.71845100 |
| C | -3.90929700 | 3.70527100  | -1.45422100 |
| H | -3.75251100 | 4.43865500  | -2.24916900 |
| C | -4.35136600 | 4.13072600  | -0.20852500 |
| H | -4.53904200 | 5.19138500  | -0.02482000 |
| C | -4.55528700 | 3.19986400  | 0.80497000  |
| H | -4.90355600 | 3.53826300  | 1.78246000  |
| C | -4.32833300 | 1.83865500  | 0.58972000  |
| C | -3.16198200 | 1.95169200  | -3.09373400 |
| H | -3.08227500 | 0.85562900  | -3.11696500 |
| C | -4.12059600 | 2.39041100  | -4.20132600 |
| H | -4.16484100 | 3.48788200  | -4.28710400 |
| H | -5.14705100 | 2.03481900  | -4.02750200 |
| H | -3.78394600 | 1.99948600  | -5.17400900 |
| C | -1.75821600 | 2.49662100  | -3.35395400 |
| H | -1.76582100 | 3.59538500  | -3.43584800 |
| H | -1.35761700 | 2.08709900  | -4.29350400 |
| H | -1.06606100 | 2.21451700  | -2.54987600 |
| C | -4.61296000 | 0.82764800  | 1.68365300  |
| H | -3.93689500 | -0.02345200 | 1.50853600  |
| C | -6.03884500 | 0.28147000  | 1.58525000  |
| H | -6.77656300 | 1.09340700  | 1.68768700  |
| H | -6.22623800 | -0.45189100 | 2.38556800  |
| H | -6.22065600 | -0.22220400 | 0.62626100  |
| C | -4.34031500 | 1.36152900  | 3.08631400  |
| H | -3.34679200 | 1.82714600  | 3.16092700  |
| H | -4.38526300 | 0.54091800  | 3.81842100  |
| H | -5.08998700 | 2.10779200  | 3.39315700  |
| C | 3.76684000  | -0.63069600 | -0.50905100 |
| C | 4.98348300  | -1.23208700 | -1.11653700 |
| C | 6.22209600  | -0.61409200 | -0.91576000 |
| H | 6.27616400  | 0.29557500  | -0.31354700 |

|   |             |             |             |
|---|-------------|-------------|-------------|
| C | 7.37631200  | -1.15666700 | -1.47664500 |
| H | 8.34037700  | -0.67068200 | -1.30987600 |
| C | 7.29950900  | -2.31319500 | -2.25098400 |
| H | 8.20347200  | -2.73509000 | -2.69645900 |
| C | 6.06523300  | -2.92993400 | -2.45618400 |
| H | 5.99920400  | -3.83387000 | -3.06606200 |
| C | 4.91241800  | -2.39631800 | -1.88762100 |
| H | 3.94376100  | -2.86943000 | -2.05603500 |
| C | 3.31705500  | 1.21840400  | -2.22936400 |
| C | 3.72464200  | 0.27388800  | -3.36381700 |
| H | 4.76506200  | -0.06425900 | -3.28914200 |
| H | 3.61881400  | 0.80838600  | -4.31947400 |
| H | 3.06554200  | -0.60692000 | -3.39655600 |
| C | 1.94081300  | 1.77892700  | -2.60236500 |
| H | 1.18296500  | 0.98194500  | -2.62330800 |
| H | 1.98586600  | 2.24632300  | -3.59749100 |
| H | 1.61394500  | 2.55277300  | -1.89708400 |
| C | 4.33191400  | 2.35866400  | -2.10787100 |
| H | 5.33291500  | 1.96287400  | -1.87930000 |
| H | 4.03176500  | 3.05036500  | -1.30790200 |
| H | 4.39825300  | 2.92214500  | -3.05215300 |
| C | 3.48580200  | -2.05149700 | 1.55059300  |
| C | 4.77637700  | -1.67732700 | 2.28466600  |
| H | 4.66851700  | -0.70105100 | 2.77163300  |
| H | 5.63301700  | -1.64039400 | 1.59535200  |
| H | 4.99988300  | -2.42643400 | 3.06001400  |
| C | 2.32199000  | -2.08935200 | 2.54347800  |
| H | 2.51751200  | -2.83768300 | 3.32635700  |
| H | 1.38857100  | -2.35226900 | 2.02721900  |
| H | 2.19252100  | -1.10513500 | 3.01224900  |
| C | 3.64408700  | -3.44775300 | 0.94348400  |
| H | 3.74116000  | -4.18614700 | 1.75395900  |
| H | 4.53732300  | -3.52805000 | 0.31056800  |
| H | 2.75848200  | -3.70927700 | 0.35266400  |
| C | -0.66163600 | 0.22988600  | 0.79866900  |
| H | -0.78891600 | 1.30223300  | 0.57258500  |
| C | -1.02535600 | -0.00174900 | 2.25859800  |
| H | -0.74085900 | -1.03414900 | 2.51648900  |
| H | -2.11689500 | 0.05667700  | 2.37807000  |
| C | -0.36863800 | 0.97628600  | 3.22246200  |
| H | 0.72768400  | 0.95087400  | 3.13668700  |
| H | -0.68913700 | 2.00845600  | 3.00840300  |
| H | -0.63230400 | 0.74540600  | 4.26707000  |
| C | 0.15584100  | 4.61722600  | 0.34672700  |
| C | 1.66452600  | 4.97850500  | 0.56802500  |
| B | 1.43226400  | 2.70173900  | 0.35183200  |
| O | 0.15606200  | 3.18871900  | 0.50962200  |
| O | 2.32960900  | 3.74656000  | 0.24213300  |
| H | 3.92995200  | 2.80723800  | 1.72498800  |
| C | 4.02548700  | 1.80276700  | 2.17785800  |
| O | 2.83722300  | 1.07834900  | 2.02775800  |
| H | 4.85769200  | 1.29571800  | 1.64726900  |
| C | 4.38529600  | 1.92520400  | 3.64883900  |
| H | 4.56192000  | 0.91482400  | 4.05530200  |
| H | 5.34880100  | 2.45938800  | 3.72087300  |
| C | 3.32892400  | 2.62659500  | 4.48535500  |
| H | 2.35708200  | 2.12185000  | 4.38260200  |
| H | 3.59925100  | 2.63197100  | 5.55221200  |
| H | 3.19782200  | 3.67273500  | 4.16941800  |
| C | -0.80918000 | 5.21006600  | 1.35780500  |
| H | -0.56602600 | 4.89760100  | 2.38120300  |
| H | -0.80202900 | 6.30979100  | 1.31220500  |
| H | -1.82692300 | 4.86128300  | 1.12956400  |
| C | -0.33510600 | 4.91017400  | -1.06333400 |
| H | 0.32954200  | 4.47272400  | -1.82144000 |
| H | -1.32856300 | 4.45963800  | -1.18535200 |
| H | -0.41501800 | 5.99122000  | -1.24813100 |
| C | 2.19910400  | 6.07323600  | -0.33651400 |
| H | 1.66338700  | 7.01970900  | -0.16799000 |

|   |            |            |             |
|---|------------|------------|-------------|
| H | 3.26431000 | 6.24060300 | -0.12023800 |
| H | 2.10844800 | 5.80096600 | -1.39564500 |
| C | 1.99103800 | 5.29345300 | 2.02197900  |
| H | 1.62134300 | 4.50260800 | 2.68918700  |
| H | 3.08270000 | 5.35231500 | 2.13962000  |
| H | 1.55710300 | 6.25314200 | 2.33782100  |

Cartesian coordinates of the optimized geometry of Int-8 at PBE0-D3BJ/def2-SVP level of theory:

|    |             |             |             |
|----|-------------|-------------|-------------|
| Ga | -1.99521900 | -0.56402700 | -0.59332500 |
| Cl | -1.26516900 | -0.95301500 | -2.67062400 |
| Si | 2.10661400  | 0.31740700  | 0.21958200  |
| O  | 0.60245800  | -0.39794100 | 0.28437500  |
| N  | -2.87740300 | -2.24832000 | -0.12324900 |
| N  | -3.65669600 | 0.42894200  | -0.95097800 |
| N  | 2.92747300  | -0.31150100 | -1.33852700 |
| N  | 3.24925800  | -1.09763700 | 0.63346200  |
| C  | -3.98269000 | -2.57710000 | -0.79329400 |
| C  | -4.78365500 | -1.64264200 | -1.46619500 |
| H  | -5.65394300 | -2.04998600 | -1.97962700 |
| C  | -4.69811500 | -0.23661500 | -1.44055500 |
| C  | -4.38982800 | -4.02097700 | -0.86930900 |
| H  | -3.82544700 | -4.49316200 | -1.69040400 |
| H  | -5.45972200 | -4.12861000 | -1.08520200 |
| H  | -4.14023600 | -4.56913400 | 0.04798800  |
| C  | -5.85749900 | 0.52011200  | -2.02386500 |
| H  | -5.98079000 | 1.50548900  | -1.55671600 |
| H  | -6.78815100 | -0.05274800 | -1.92863100 |
| H  | -5.67260300 | 0.68838000  | -3.09662700 |
| C  | -2.26206900 | -3.14985000 | 0.79832100  |
| C  | -1.20047000 | -3.98175300 | 0.39181300  |
| C  | -0.57984600 | -4.78521600 | 1.35496700  |
| H  | 0.24943700  | -5.43056800 | 1.05418300  |
| C  | -0.99888800 | -4.78049800 | 2.67826600  |
| H  | -0.50038700 | -5.41451600 | 3.41528400  |
| C  | -2.05667400 | -3.96266800 | 3.06337800  |
| H  | -2.37944800 | -3.96104500 | 4.10604600  |
| C  | -2.70115100 | -3.13285300 | 2.14368800  |
| C  | -0.71922300 | -4.03930100 | -1.04325900 |
| H  | -1.35205800 | -3.36617900 | -1.63823800 |
| C  | -0.85510500 | -5.44576300 | -1.62651900 |
| H  | -0.19417600 | -6.16368000 | -1.11468500 |
| H  | -0.58081900 | -5.44567100 | -2.69301900 |
| H  | -1.88406900 | -5.82663100 | -1.53952700 |
| C  | 0.71356000  | -3.52301300 | -1.16961600 |
| H  | 0.81386800  | -2.51724800 | -0.73761400 |
| H  | 1.00468200  | -3.46843500 | -2.23022600 |
| H  | 1.42086800  | -4.19411800 | -0.65438700 |
| C  | -3.84884200 | -2.24283000 | 2.58614900  |
| H  | -3.86763100 | -1.38718200 | 1.89359400  |
| C  | -5.19974900 | -2.95100100 | 2.46030900  |
| H  | -5.22347700 | -3.85850100 | 3.08482500  |
| H  | -5.41819000 | -3.24748100 | 1.42638300  |
| H  | -6.01384900 | -2.28812100 | 2.79340900  |
| C  | -3.67731100 | -1.69714800 | 4.00108700  |
| H  | -2.69618100 | -1.22159500 | 4.14215500  |
| H  | -3.78392200 | -2.48729200 | 4.76065300  |
| H  | -4.45525100 | -0.94758900 | 4.21203800  |
| C  | -3.65518900 | 1.85390000  | -0.83716300 |
| C  | -3.34160900 | 2.66889700  | -1.94475300 |
| C  | -3.32066300 | 4.05600000  | -1.76021500 |
| H  | -3.07789900 | 4.69933600  | -2.60938600 |
| C  | -3.58588300 | 4.62795700  | -0.52432400 |
| H  | -3.55504900 | 5.71308900  | -0.40228700 |
| C  | -3.87911200 | 3.81154600  | 0.56282600  |
| H  | -4.07915800 | 4.26443200  | 1.53524600  |
| C  | -3.92000100 | 2.42198300  | 0.43034900  |

|   |             |             |             |
|---|-------------|-------------|-------------|
| C | -3.00373100 | 2.10832900  | -3.31222900 |
| H | -3.10881600 | 1.01452300  | -3.26924900 |
| C | -3.93863200 | 2.64158200  | -4.39840600 |
| H | -3.80499400 | 3.72435300  | -4.55059600 |
| H | -4.99780600 | 2.47479900  | -4.15199000 |
| H | -3.72938100 | 2.14711100  | -5.35961400 |
| C | -1.54529900 | 2.39576700  | -3.66665800 |
| H | -1.36177000 | 3.47790600  | -3.76458100 |
| H | -1.27768500 | 1.91476700  | -4.61971300 |
| H | -0.86895900 | 2.00322000  | -2.89750200 |
| C | -4.27842000 | 1.54539100  | 1.61327200  |
| H | -3.75726800 | 0.58804200  | 1.46056700  |
| C | -5.77480700 | 1.22969900  | 1.64402100  |
| H | -6.36706800 | 2.15382800  | 1.73817500  |
| H | -6.01593800 | 0.58231100  | 2.50214400  |
| H | -6.10258600 | 0.70903100  | 0.73355600  |
| C | -3.81587100 | 2.11498400  | 2.94978000  |
| H | -2.75449200 | 2.40118600  | 2.92461300  |
| H | -3.94366900 | 1.36652700  | 3.74552500  |
| H | -4.40100500 | 3.00060500  | 3.24312500  |
| C | 3.68848300  | -1.13784400 | -0.62128800 |
| C | 4.83203400  | -1.93536200 | -1.12960400 |
| C | 6.13530400  | -1.43761900 | -1.04417300 |
| H | 6.31106300  | -0.45654900 | -0.59804500 |
| C | 7.20055400  | -2.19262300 | -1.53026900 |
| H | 8.21716900  | -1.79874500 | -1.46407000 |
| C | 6.96985000  | -3.44471100 | -2.09783200 |
| H | 7.80700100  | -4.03538500 | -2.47692300 |
| C | 5.66975000  | -3.94214500 | -2.18259100 |
| H | 5.48487500  | -4.92222700 | -2.62786700 |
| C | 4.60097400  | -3.18997300 | -1.70269000 |
| H | 3.57982300  | -3.57025700 | -1.77044100 |
| C | 3.08481200  | 0.21564500  | -2.69747900 |
| C | 3.09932600  | -0.91246300 | -3.72867500 |
| H | 3.99914700  | -1.53704400 | -3.64851000 |
| H | 3.08002200  | -0.48198400 | -4.74106100 |
| H | 2.20881000  | -1.54763600 | -3.60927600 |
| C | 1.85630900  | 1.08817200  | -2.92920700 |
| H | 0.93495900  | 0.49460600  | -2.84575400 |
| H | 1.89003100  | 1.54857600  | -3.92714400 |
| H | 1.84054600  | 1.89713100  | -2.18507000 |
| C | 4.34535600  | 1.07976700  | -2.79014500 |
| H | 5.25599100  | 0.47448100  | -2.67391300 |
| H | 4.32144500  | 1.85690600  | -2.01010400 |
| H | 4.39434100  | 1.57014600  | -3.77461500 |
| C | 3.69312500  | -1.79221500 | 1.84474000  |
| C | 5.09337600  | -1.32245100 | 2.24725000  |
| H | 5.10793800  | -0.22415800 | 2.28767000  |
| H | 5.85625300  | -1.66932600 | 1.53638500  |
| H | 5.35492500  | -1.71871800 | 3.24014900  |
| C | 2.70249500  | -1.40209800 | 2.93837900  |
| H | 2.97011700  | -1.89308100 | 3.88507300  |
| H | 1.68136000  | -1.70447400 | 2.66398400  |
| H | 2.73049300  | -0.31288600 | 3.08680800  |
| C | 3.65547500  | -3.30837000 | 1.64750100  |
| H | 3.90084900  | -3.80891600 | 2.59624200  |
| H | 4.38121100  | -3.64488500 | 0.89446100  |
| H | 2.64910700  | -3.62853000 | 1.33933900  |
| C | -0.64465500 | 0.18166200  | 0.65414000  |
| H | -0.61265500 | 1.27227400  | 0.49495500  |
| C | -0.94291500 | -0.07971900 | 2.12483500  |
| H | -0.74833000 | -1.14581200 | 2.32833000  |
| H | -2.02080200 | 0.06161800  | 2.29701900  |
| C | -0.17378000 | 0.80629700  | 3.09187100  |
| H | 0.91161300  | 0.73600600  | 2.94299300  |
| H | -0.42631900 | 1.86657900  | 2.94690000  |
| H | -0.38723000 | 0.53342800  | 4.13761200  |
| C | 1.20984000  | 4.07954100  | 0.51864800  |
| C | 2.59676300  | 4.32142500  | -0.18742000 |

|   |             |            |             |
|---|-------------|------------|-------------|
| B | 2.62524700  | 2.26779900 | 0.95758100  |
| O | 1.49693500  | 3.03912800 | 1.42612200  |
| O | 3.22584200  | 3.05407800 | -0.10192500 |
| H | 4.47327200  | 3.55545500 | 2.26913000  |
| C | 4.38580800  | 2.55077300 | 2.71553700  |
| O | 3.49564900  | 1.74981000 | 1.98842700  |
| H | 5.39433600  | 2.09727900 | 2.65142000  |
| C | 3.99495600  | 2.65730600 | 4.18228800  |
| H | 3.89059400  | 1.63190500 | 4.57911600  |
| H | 4.83773700  | 3.11385400 | 4.73192200  |
| C | 2.71801900  | 3.44246000 | 4.43238700  |
| H | 1.88984100  | 3.04724200 | 3.82749500  |
| H | 2.42971000  | 3.41602400 | 5.49482100  |
| H | 2.84402200  | 4.50050300 | 4.14876000  |
| C | 0.68130100  | 5.27701900 | 1.29677700  |
| H | 1.36326700  | 5.56234000 | 2.10738100  |
| H | 0.52635200  | 6.14575400 | 0.63809600  |
| H | -0.28767000 | 5.01697300 | 1.74897400  |
| C | 0.12394500  | 3.62279600 | -0.45513300 |
| H | 0.43862400  | 2.73735200 | -1.02321700 |
| H | -0.78368900 | 3.36115400 | 0.10830300  |
| H | -0.15194200 | 4.40763800 | -1.17368300 |
| C | 2.49796700  | 4.73846800 | -1.64844400 |
| H | 1.95760500  | 5.69212600 | -1.75297000 |
| H | 3.50932400  | 4.87474800 | -2.06060000 |
| H | 1.98789800  | 3.98272700 | -2.25814500 |
| C | 3.45250200  | 5.35197600 | 0.54966800  |
| H | 3.47799200  | 5.15534500 | 1.62951100  |
| H | 4.48216300  | 5.28950000 | 0.16748300  |
| H | 3.08596300  | 6.37810000 | 0.39644700  |

Cartesian coordinates of the optimized geometry of TS-1 at PBE0-D3BJ/def2-SVP level of theory:

|    |             |             |             |
|----|-------------|-------------|-------------|
| Ga | 0.93009400  | 0.24526600  | -0.77402900 |
| Cl | 0.84652500  | -0.01866800 | -3.02334300 |
| Si | -0.72085300 | -1.24718800 | 0.23038400  |
| N  | 2.80575300  | -0.33820300 | -0.44784300 |
| N  | 1.36902000  | 2.16331800  | -0.62461400 |
| C  | 3.79083700  | 0.40778100  | -0.92108200 |
| C  | 3.59537100  | 1.70731800  | -1.43880200 |
| H  | 4.45798100  | 2.15402700  | -1.93219800 |
| C  | 2.50260500  | 2.54873200  | -1.23424900 |
| C  | 5.20441800  | -0.10131000 | -0.93427000 |
| H  | 5.46080000  | -0.41879100 | -1.95703800 |
| H  | 5.34331000  | -0.95944200 | -0.26617700 |
| H  | 5.90175300  | 0.69921000  | -0.65378100 |
| C  | 2.60548600  | 3.95785300  | -1.74803600 |
| H  | 3.63798600  | 4.21082100  | -2.01669900 |
| H  | 2.22609700  | 4.69311600  | -1.02677100 |
| H  | 1.97964100  | 4.04462300  | -2.65117900 |
| C  | 3.04296600  | -1.61814800 | 0.14234200  |
| C  | 3.26545000  | -2.74958600 | -0.67000000 |
| C  | 3.43701300  | -3.98882200 | -0.04270700 |
| H  | 3.60863300  | -4.87570900 | -0.65777100 |
| C  | 3.38755500  | -4.11278200 | 1.33852700  |
| H  | 3.51397400  | -5.09143900 | 1.80736200  |
| C  | 3.16848400  | -2.98721000 | 2.12564400  |
| H  | 3.11561600  | -3.09177200 | 3.20940400  |
| C  | 2.99576500  | -1.72671900 | 1.55116600  |
| C  | 3.32401800  | -2.68127300 | -2.18439400 |
| H  | 3.17063500  | -1.63513000 | -2.48717600 |
| C  | 4.67516100  | -3.15311600 | -2.72502700 |
| H  | 4.82936900  | -4.22646500 | -2.53110800 |
| H  | 5.51779200  | -2.61479300 | -2.26845700 |
| H  | 4.72499600  | -3.00573100 | -3.81521700 |
| C  | 2.19136400  | -3.49000400 | -2.81207800 |
| H  | 1.22017100  | -3.17505100 | -2.41448500 |



|   |             |             |             |
|---|-------------|-------------|-------------|
| H | 2.30788900  | -4.56720500 | -2.61165500 |
| H | 2.17089100  | -3.34697100 | -3.90332000 |
| C | 2.80639800  | -0.49987200 | 2.42263700  |
| H | 2.05901700  | 0.13539900  | 1.91532700  |
| C | 4.10648600  | 0.30289100  | 2.52152500  |
| H | 4.91212700  | -0.32566100 | 2.93290000  |
| H | 3.97738400  | 1.16412500  | 3.19458800  |
| H | 4.44014100  | 0.69048600  | 1.54956600  |
| C | 2.26673000  | -0.81407600 | 3.81288500  |
| H | 3.02775800  | -1.31118000 | 4.43640000  |
| H | 1.37106200  | -1.45276600 | 3.75295100  |
| H | 1.99610000  | 0.12231900  | 4.32416200  |
| C | 0.48773500  | 3.15971600  | -0.10852000 |
| C | -0.59348100 | 3.62849800  | -0.87924400 |
| C | -1.43942000 | 4.59723800  | -0.32841700 |
| H | -2.28473500 | 4.96410200  | -0.91582800 |
| C | -1.21799900 | 5.10512300  | 0.94429900  |
| H | -1.88807400 | 5.86190900  | 1.35888500  |
| C | -0.13794300 | 4.64555400  | 1.69079800  |
| H | 0.03048000  | 5.04953400  | 2.69048100  |
| C | 0.73078600  | 3.67318500  | 1.18910000  |
| C | -0.86049000 | 3.11237700  | -2.27706700 |
| H | -0.00669200 | 2.48981400  | -2.58058100 |
| C | -0.99842500 | 4.23955100  | -3.29879800 |
| H | -1.89652100 | 4.85182500  | -3.11943000 |
| H | -1.08179700 | 3.82343300  | -4.31458800 |
| H | -0.12932600 | 4.91455700  | -3.27775700 |
| C | -2.08922800 | 2.20871000  | -2.28480700 |
| H | -1.95397400 | 1.35172100  | -1.60809800 |
| H | -2.27556300 | 1.81039200  | -3.29284700 |
| H | -2.98419900 | 2.76621700  | -1.96240700 |
| C | 1.91702400  | 3.20735400  | 2.01661600  |
| H | 2.11656100  | 2.16640400  | 1.71968900  |
| C | 3.18276600  | 4.01530700  | 1.71504500  |
| H | 4.00444600  | 3.69081400  | 2.37227400  |
| H | 3.01088900  | 5.08913000  | 1.89291500  |
| H | 3.52567900  | 3.88936200  | 0.68091800  |
| C | 1.65306500  | 3.23086500  | 3.51977500  |
| H | 2.47407500  | 2.72870600  | 4.05294200  |
| H | 0.71761100  | 2.72086400  | 3.78303200  |
| H | 1.60350100  | 4.26000800  | 3.90914000  |
| N | -2.11290200 | -0.27353200 | 0.96950500  |
| N | -2.22828500 | -1.33050000 | -0.88870400 |
| C | -2.96107700 | -0.67592900 | 0.02168000  |
| C | -4.43477500 | -0.50189000 | 0.01912200  |
| C | -5.23866300 | -1.34967200 | 0.79026200  |
| H | -4.77361900 | -2.13764700 | 1.38555700  |
| C | -6.62275700 | -1.20246600 | 0.78058100  |
| H | -7.24199100 | -1.87227400 | 1.38134800  |
| C | -7.21538300 | -0.20624800 | 0.00522200  |
| H | -8.30172100 | -0.09089700 | -0.00030000 |
| C | -6.41886600 | 0.64134100  | -0.76248400 |
| H | -6.87733700 | 1.42535600  | -1.36930500 |
| C | -5.03351800 | 0.49405000  | -0.75846100 |
| H | -4.40770600 | 1.16309500  | -1.34975400 |
| C | -2.63318500 | -2.10942700 | -2.06441800 |
| C | -1.41267600 | -2.92992600 | -2.46903800 |
| H | -1.11173100 | -3.61947800 | -1.66563400 |
| H | -0.57421000 | -2.25876400 | -2.70350200 |
| H | -1.63201500 | -3.52485800 | -3.36742200 |
| C | -3.80060100 | -3.05190300 | -1.76010200 |
| H | -3.58677200 | -3.66497900 | -0.87219600 |
| H | -3.95409100 | -3.72827400 | -2.61426700 |
| H | -4.74034300 | -2.50964900 | -1.59234500 |
| C | -2.99130100 | -1.16991000 | -3.21759800 |
| H | -3.85079700 | -0.53374000 | -2.96322100 |
| H | -3.25739700 | -1.75619400 | -4.11027300 |
| H | -2.13075100 | -0.53238900 | -3.46315300 |
| C | -2.31052800 | 0.50325500  | 2.19716500  |

|   |             |             |            |
|---|-------------|-------------|------------|
| C | -3.05839700 | -0.32102300 | 3.24764700 |
| H | -2.51294800 | -1.26210100 | 3.41769200 |
| H | -4.09262200 | -0.52711700 | 2.93954500 |
| H | -3.09808300 | 0.23722100  | 4.19550100 |
| C | -3.03375000 | 1.81317400  | 1.88704700 |
| H | -3.06955000 | 2.43715300  | 2.79244600 |
| H | -4.06801800 | 1.64348100  | 1.55588000 |
| H | -2.49794900 | 2.37787200  | 1.10923800 |
| C | -0.90876900 | 0.79497600  | 2.72028600 |
| H | -0.38712400 | -0.15368200 | 2.92325600 |
| H | -0.97184600 | 1.36129100  | 3.66022800 |
| H | -0.34359200 | 1.39678800  | 1.99355000 |
| O | -0.45056400 | -2.32267100 | 2.94367200 |
| C | -0.46645600 | -2.90862800 | 1.82841300 |
| H | 0.48829300  | -3.31753200 | 1.41809600 |
| C | -1.66224700 | -3.79586600 | 1.48717000 |
| H | -1.55620500 | -4.18796400 | 0.46226700 |
| H | -2.58851000 | -3.19532000 | 1.51985400 |
| C | -1.76704500 | -4.93652700 | 2.49317700 |
| H | -1.85816800 | -4.53161200 | 3.51128300 |
| H | -2.63698100 | -5.57997700 | 2.28872500 |
| H | -0.86519800 | -5.56919900 | 2.46592100 |

Cartesian coordinates of the optimized geometry of TS-2 at PBE0-D3BJ/def2-SVP level of theory:

|    |             |             |             |
|----|-------------|-------------|-------------|
| Ga | 0.93454100  | -0.02527800 | -0.69791500 |
| Cl | 0.82465300  | -0.80388600 | -2.81312200 |
| Si | -1.03683500 | -0.41950400 | 0.52458300  |
| N  | 2.93348100  | -0.19969600 | -0.46086100 |
| N  | 1.08170300  | 1.96257200  | -1.04607100 |
| C  | 3.72877100  | 0.56362600  | -1.21543400 |
| C  | 3.31385000  | 1.71367200  | -1.90135400 |
| H  | 4.06972100  | 2.19275100  | -2.52145000 |
| C  | 2.12684500  | 2.43563300  | -1.71955300 |
| C  | 5.18468100  | 0.20724100  | -1.35082200 |
| H  | 5.29340300  | -0.70980400 | -1.94683600 |
| H  | 5.64319500  | 0.00037500  | -0.37440500 |
| H  | 5.73789400  | 1.01326700  | -1.84648700 |
| C  | 2.10698000  | 3.83848000  | -2.26406300 |
| H  | 2.41602700  | 4.55025500  | -1.48336200 |
| H  | 1.10454300  | 4.13913600  | -2.59344500 |
| H  | 2.81300000  | 3.93071700  | -3.09946100 |
| C  | 3.56071300  | -1.22968500 | 0.31090900  |
| C  | 3.86934000  | -2.48097800 | -0.26119900 |
| C  | 4.51061900  | -3.43741300 | 0.53452500  |
| H  | 4.74967700  | -4.41205500 | 0.10216800  |
| C  | 4.85057900  | -3.17331200 | 1.85324700  |
| H  | 5.35525200  | -3.93268900 | 2.45518000  |
| C  | 4.53676900  | -1.93705600 | 2.40722700  |
| H  | 4.79494400  | -1.73644000 | 3.44827700  |
| C  | 3.88592900  | -0.95362300 | 1.65966200  |
| C  | 3.51698100  | -2.84371200 | -1.69038300 |
| H  | 3.11342800  | -1.94672100 | -2.18142400 |
| C  | 4.72219100  | -3.33221100 | -2.49455300 |
| H  | 5.10921200  | -4.28822200 | -2.10769600 |
| H  | 5.55633400  | -2.61458000 | -2.48250900 |
| H  | 4.43483700  | -3.49626300 | -3.54460500 |
| C  | 2.40974700  | -3.89532200 | -1.70908700 |
| H  | 1.55656500  | -3.57124000 | -1.10210700 |
| H  | 2.76688700  | -4.85675200 | -1.30521700 |
| H  | 2.04958900  | -4.06418300 | -2.73532000 |
| C  | 3.53747900  | 0.38029500  | 2.29651800  |
| H  | 2.66388300  | 0.77214300  | 1.75194200  |
| C  | 4.66347300  | 1.40178800  | 2.12597200  |
| H  | 5.59709600  | 1.03796800  | 2.58434900  |
| H  | 4.39840800  | 2.35458400  | 2.61117800  |
| H  | 4.86481800  | 1.61594800  | 1.06697100  |

|   |             |             |             |
|---|-------------|-------------|-------------|
| C | 3.14064800  | 0.24082300  | 3.76332400  |
| H | 3.98967200  | -0.06534700 | 4.39389700  |
| H | 2.33346600  | -0.49577400 | 3.88971500  |
| H | 2.78161600  | 1.20259200  | 4.15531100  |
| C | 0.06311200  | 2.88474800  | -0.67354500 |
| C | -1.16594500 | 2.91845300  | -1.37179900 |
| C | -2.09326600 | 3.90816500  | -1.03070400 |
| H | -3.04079700 | 3.96047600  | -1.56890400 |
| C | -1.83260400 | 4.83584400  | -0.02781600 |
| H | -2.57065500 | 5.60430000  | 0.21376300  |
| C | -0.64010200 | 4.76347800  | 0.67869600  |
| H | -0.45044100 | 5.46976600  | 1.49035300  |
| C | 0.31776400  | 3.78995000  | 0.37992100  |
| C | -1.46694500 | 1.93732300  | -2.48788000 |
| H | -1.02127300 | 0.97550400  | -2.19294200 |
| C | -0.81139400 | 2.33393500  | -3.81022000 |
| H | -1.14851500 | 3.33105400  | -4.13787400 |
| H | -1.07230800 | 1.60591600  | -4.59325900 |
| H | 0.28341800  | 2.33846800  | -3.73389000 |
| C | -2.95911800 | 1.69556000  | -2.67999900 |
| H | -3.44204800 | 1.43927600  | -1.72467800 |
| H | -3.11601600 | 0.86321700  | -3.38108900 |
| H | -3.47508100 | 2.57367600  | -3.10012200 |
| C | 1.56196200  | 3.69162600  | 1.24210600  |
| H | 2.26720700  | 3.00734600  | 0.74798900  |
| C | 2.27284500  | 5.03063500  | 1.42865800  |
| H | 3.22261200  | 4.88578200  | 1.96640500  |
| H | 1.66900200  | 5.73727300  | 2.01938900  |
| H | 2.50040100  | 5.51375400  | 0.46644200  |
| C | 1.19847000  | 3.07602500  | 2.59367400  |
| H | 2.08269800  | 3.02496300  | 3.24615000  |
| H | 0.79610500  | 2.05910700  | 2.47906900  |
| H | 0.43549400  | 3.68092900  | 3.10870700  |
| N | -2.80605600 | 0.14085200  | 0.98895500  |
| N | -2.30603500 | -1.67552200 | -0.07976300 |
| C | -3.31427900 | -0.92841100 | 0.40812400  |
| C | -4.76154500 | -1.25399500 | 0.33200200  |
| C | -5.31351200 | -2.16481000 | 1.23906300  |
| H | -4.67003500 | -2.64190400 | 1.98112100  |
| C | -6.67091700 | -2.46647400 | 1.18634900  |
| H | -7.09553400 | -3.17798100 | 1.89805300  |
| C | -7.48456900 | -1.86736100 | 0.22474200  |
| H | -8.54896000 | -2.10921600 | 0.18110900  |
| C | -6.93751700 | -0.95826600 | -0.67905500 |
| H | -7.57044100 | -0.48504000 | -1.43302200 |
| C | -5.58090900 | -0.64580000 | -0.62301300 |
| H | -5.15310500 | 0.07239100  | -1.32483800 |
| C | -2.40405200 | -2.68653900 | -1.15555900 |
| C | -1.05851900 | -3.38777300 | -1.26378800 |
| H | -0.83721500 | -3.96810100 | -0.35971500 |
| H | -0.25450200 | -2.66505600 | -1.43680400 |
| H | -1.07076100 | -4.07509500 | -2.12192700 |
| C | -3.46347200 | -3.75170000 | -0.85530500 |
| H | -3.33757500 | -4.15475300 | 0.16058500  |
| H | -3.33353200 | -4.58111600 | -1.56618000 |
| H | -4.49071400 | -3.38332500 | -0.96382300 |
| C | -2.71692900 | -1.99417000 | -2.48441800 |
| H | -3.67776200 | -1.46164600 | -2.43840800 |
| H | -2.78309300 | -2.73831600 | -3.29260200 |
| H | -1.91810800 | -1.28505700 | -2.74484500 |
| C | -3.36725800 | 1.06747000  | 1.97679600  |
| C | -3.86643400 | 0.29635900  | 3.20162300  |
| H | -3.07056900 | -0.36455600 | 3.57665300  |
| H | -4.75496100 | -0.30712000 | 2.96979800  |
| H | -4.13913400 | 1.00037500  | 4.00234200  |
| C | -4.48601300 | 1.91671300  | 1.37202000  |
| H | -4.81824100 | 2.66770600  | 2.10469300  |
| H | -5.35819700 | 1.30965000  | 1.09356900  |
| H | -4.12050400 | 2.44903100  | 0.48157700  |

|   |             |             |            |
|---|-------------|-------------|------------|
| C | -2.21310200 | 1.97233400  | 2.39902900 |
| H | -1.42041900 | 1.37772200  | 2.87435400 |
| H | -2.56495800 | 2.73057900  | 3.11350200 |
| H | -1.78970400 | 2.49182900  | 1.52895100 |
| O | -0.43278900 | -0.69973100 | 2.06107500 |
| C | 0.56575300  | -1.51835800 | 1.39882500 |
| H | 1.55804300  | -1.14735600 | 1.68645500 |
| C | 0.44797900  | -2.97162500 | 1.78338100 |
| H | 1.11957400  | -3.56621900 | 1.14136000 |
| H | -0.57795400 | -3.32104500 | 1.57954900 |
| C | 0.78403700  | -3.22089300 | 3.25081700 |
| H | 0.63652600  | -4.27597500 | 3.53398500 |
| H | 1.83431600  | -2.96213000 | 3.45983500 |
| H | 0.14605500  | -2.59975400 | 3.89836800 |

Cartesian coordinates of the optimized geometry of TS-3 at PBE0-D3BJ/def2-SVP level of theory:

|   |             |             |             |
|---|-------------|-------------|-------------|
| O | -1.59707400 | -0.96737900 | 0.46106300  |
| C | -2.35849000 | -0.62835000 | -0.48016800 |
| H | -2.68583700 | -1.39367600 | -1.22249100 |
| C | -3.23049700 | 0.59277600  | -0.38969000 |
| H | -3.54005600 | 0.90207700  | -1.40024000 |
| H | -2.64237900 | 1.40231000  | 0.06640300  |
| C | -4.44594600 | 0.25976800  | 0.47336500  |
| H | -4.13212800 | -0.03460700 | 1.48524500  |
| H | -5.10433600 | 1.13592000  | 0.55882600  |
| H | -5.03932800 | -0.56382100 | 0.04578600  |
| H | -1.24745400 | -0.05548200 | -1.62191000 |
| C | 1.41480800  | 0.86390900  | 0.12404100  |
| C | 1.64995400  | -0.68708800 | -0.00696600 |
| B | -0.41923500 | -0.18121200 | -0.67017300 |
| O | -0.00418000 | 0.98564900  | -0.04521800 |
| O | 0.60803000  | -1.07102700 | -0.91793600 |
| C | 1.43617800  | -1.42795300 | 1.30963700  |
| H | 1.39132200  | -2.50629600 | 1.09991300  |
| H | 2.25992000  | -1.24427300 | 2.01474400  |
| H | 0.48838100  | -1.13924200 | 1.78280300  |
| C | 2.98440500  | -1.07597000 | -0.61446900 |
| H | 3.81826600  | -0.70552900 | 0.00104700  |
| H | 3.05902300  | -2.17194900 | -0.66625900 |
| H | 3.09243000  | -0.68168600 | -1.63281900 |
| C | 1.80121400  | 1.44784000  | 1.47014400  |
| H | 2.87283400  | 1.29721600  | 1.67168200  |
| H | 1.60186900  | 2.52955300  | 1.47447600  |
| H | 1.22011100  | 0.99348200  | 2.28238200  |
| C | 2.07287400  | 1.65174800  | -1.00366900 |
| H | 1.69013800  | 2.68237100  | -0.98196600 |
| H | 3.16731600  | 1.68508200  | -0.90066800 |
| H | 1.82488300  | 1.21659000  | -1.98270500 |

Cartesian coordinates of the optimized geometry of TS-4 at PBE0-D3BJ/def2-SVP level of theory:

|    |             |             |             |
|----|-------------|-------------|-------------|
| Ga | -0.95710500 | -1.46182200 | -0.65873900 |
| Cl | -0.00840800 | -1.27575200 | -2.68025100 |
| Si | 2.00522500  | 1.38551000  | 0.63120400  |
| O  | 1.00505600  | 0.04625700  | 0.52362000  |
| N  | -0.62390700 | -3.35982700 | -0.23923100 |
| N  | -2.85435600 | -1.70783400 | -1.11076700 |
| N  | 3.02771200  | 1.38812400  | -0.95276000 |
| N  | 3.67687200  | 0.58086000  | 0.92375800  |
| C  | -1.24771500 | -4.26965700 | -0.98460200 |
| C  | -2.38637800 | -3.98823100 | -1.75936200 |
| H  | -2.76226900 | -4.81501600 | -2.36018300 |
| C  | -3.18954100 | -2.83570400 | -1.74057200 |
| C  | -0.71408900 | -5.67305400 | -1.04302100 |

|   |             |             |             |
|---|-------------|-------------|-------------|
| H | -1.50069300 | -6.38736900 | -1.31487600 |
| H | -0.24926700 | -5.97790800 | -0.09689300 |
| H | 0.06873800  | -5.71749900 | -1.81749800 |
| C | -4.49495900 | -2.89507100 | -2.48187300 |
| H | -4.46027800 | -2.20743600 | -3.34091500 |
| H | -5.33106900 | -2.56049600 | -1.85246900 |
| H | -4.69803000 | -3.90851400 | -2.84665200 |
| C | 0.40130800  | -3.73293300 | 0.68368200  |
| C | 1.74272000  | -3.83248900 | 0.26420300  |
| C | 2.71565100  | -4.15184900 | 1.21775800  |
| H | 3.75991400  | -4.23111600 | 0.90520100  |
| C | 2.38131900  | -4.36908600 | 2.54705200  |
| H | 3.15704000  | -4.61256800 | 3.27689700  |
| C | 1.05222500  | -4.27401500 | 2.94662200  |
| H | 0.79457300  | -4.44678900 | 3.99274300  |
| C | 0.04311800  | -3.95832600 | 2.03384300  |
| C | 2.16503300  | -3.60030400 | -1.17169200 |
| H | 1.25900100  | -3.43408800 | -1.77089300 |
| C | 2.90635300  | -4.80361800 | -1.75366300 |
| H | 3.87315700  | -4.96815400 | -1.25136100 |
| H | 3.11467400  | -4.64245400 | -2.82280500 |
| H | 2.32443500  | -5.73256000 | -1.65623300 |
| C | 3.00378600  | -2.33014200 | -1.28976600 |
| H | 2.47402300  | -1.46202600 | -0.87435700 |
| H | 3.22868500  | -2.11915400 | -2.34660100 |
| H | 3.95856200  | -2.44302800 | -0.75065800 |
| C | -1.40588000 | -3.89302100 | 2.48016200  |
| H | -1.89577600 | -3.14146500 | 1.84295000  |
| C | -2.12821500 | -5.22172600 | 2.24495000  |
| H | -1.63160000 | -6.03817600 | 2.79330200  |
| H | -2.15782800 | -5.49514000 | 1.18222900  |
| H | -3.16960600 | -5.16048100 | 2.59770200  |
| C | -1.57656100 | -3.45544400 | 3.93123400  |
| H | -1.03308200 | -2.52418000 | 4.14672400  |
| H | -1.22691200 | -4.22616200 | 4.63603700  |
| H | -2.64134000 | -3.28476300 | 4.14916100  |
| C | -3.84027400 | -0.68066300 | -0.96000100 |
| C | -4.02002900 | 0.29743400  | -1.95915400 |
| C | -5.06752700 | 1.21221400  | -1.81079800 |
| H | -5.22459100 | 1.96784400  | -2.58362500 |
| C | -5.90549100 | 1.17984200  | -0.70446900 |
| H | -6.72108700 | 1.90085200  | -0.61215100 |
| C | -5.68242200 | 0.24495200  | 0.29951900  |
| H | -6.32155800 | 0.24421500  | 1.18461800  |
| C | -4.64870000 | -0.68920400 | 0.19847200  |
| C | -3.09167600 | 0.41626500  | -3.14846100 |
| H | -2.45702000 | -0.48084700 | -3.17716700 |
| C | -3.83305600 | 0.50056600  | -4.48092200 |
| H | -4.42205600 | 1.42728800  | -4.56764800 |
| H | -4.52337300 | -0.34568100 | -4.62289500 |
| H | -3.11367800 | 0.49270300  | -5.31404100 |
| C | -2.16359200 | 1.61730100  | -2.95839300 |
| H | -2.72388800 | 2.56507800  | -2.96144000 |
| H | -1.41375500 | 1.65511700  | -3.76259800 |
| H | -1.62576800 | 1.57257700  | -2.00102800 |
| C | -4.42120600 | -1.69406000 | 1.31074500  |
| H | -3.38053800 | -2.03734500 | 1.21175200  |
| C | -5.31203900 | -2.92844300 | 1.16478400  |
| H | -6.37712000 | -2.64606200 | 1.16753000  |
| H | -5.14536900 | -3.62711600 | 1.99984200  |
| H | -5.10695700 | -3.47337900 | 0.23263100  |
| C | -4.57704500 | -1.07220400 | 2.69649500  |
| H | -3.99113700 | -0.14592300 | 2.79338600  |
| H | -4.23543200 | -1.77527800 | 3.47091400  |
| H | -5.62721900 | -0.82968300 | 2.92168200  |
| C | 4.09678900  | 0.95709900  | -0.28486800 |
| C | 5.50836600  | 0.99365800  | -0.74679500 |
| C | 6.32383700  | 2.07581300  | -0.40004000 |
| H | 5.90986800  | 2.89744400  | 0.18876000  |

|   |             |             |             |
|---|-------------|-------------|-------------|
| C | 7.65383200  | 2.10960600  | -0.81299900 |
| H | 8.28420800  | 2.95942700  | -0.54158400 |
| C | 8.17694700  | 1.06299200  | -1.57093000 |
| H | 9.22056300  | 1.08929700  | -1.89270100 |
| C | 7.36541100  | -0.01605900 | -1.91935600 |
| H | 7.77104300  | -0.83781600 | -2.51371300 |
| C | 6.03438400  | -0.05205700 | -1.51165900 |
| H | 5.39690600  | -0.89695400 | -1.77709500 |
| C | 2.87751700  | 2.02309100  | -2.26418300 |
| C | 3.61369100  | 3.36450800  | -2.31233800 |
| H | 3.26902500  | 4.02631400  | -1.50265700 |
| H | 3.41608700  | 3.87092100  | -3.26904200 |
| H | 4.70135900  | 3.23410300  | -2.21761500 |
| C | 3.37857100  | 1.09428800  | -3.37170600 |
| H | 4.46445600  | 0.93674800  | -3.31726200 |
| H | 3.15266700  | 1.53671400  | -4.35345600 |
| H | 2.86576300  | 0.12382500  | -3.30761100 |
| C | 1.37695100  | 2.23922400  | -2.45353300 |
| H | 0.94188200  | 2.86267000  | -1.65813500 |
| H | 0.85378600  | 1.27291600  | -2.45406200 |
| H | 1.18308500  | 2.73769200  | -3.41423000 |
| C | 4.36306600  | 0.06780600  | 2.10637600  |
| C | 5.04204200  | 1.21140500  | 2.86638700  |
| H | 4.31149300  | 1.99946700  | 3.10473800  |
| H | 5.85393600  | 1.65488500  | 2.27193700  |
| H | 5.47419600  | 0.84544000  | 3.81033000  |
| C | 3.27405400  | -0.55709900 | 2.98057300  |
| H | 3.71321200  | -0.97896300 | 3.89632500  |
| H | 2.74690100  | -1.35441400 | 2.43769900  |
| H | 2.53232200  | 0.19971000  | 3.27970300  |
| C | 5.38751600  | -1.00774600 | 1.74436000  |
| H | 5.78924000  | -1.45340900 | 2.66649300  |
| H | 6.23216000  | -0.60201500 | 1.17190500  |
| H | 4.91294000  | -1.80667300 | 1.15711300  |
| C | -0.40779500 | -0.07727100 | 0.64446400  |
| H | -0.88867400 | 0.87076500  | 0.35309500  |
| C | -0.80756000 | -0.40402600 | 2.07530000  |
| H | -0.24786700 | -1.29737100 | 2.39690000  |
| H | -1.87235200 | -0.68874200 | 2.07564600  |
| C | -0.59836400 | 0.72374100  | 3.07324400  |
| H | 0.46495500  | 1.00474700  | 3.13033700  |
| H | -1.15516800 | 1.62847400  | 2.78726400  |
| H | -0.91071400 | 0.41997200  | 4.08507100  |
| C | 1.04036800  | 3.62457500  | 1.01691000  |
| O | -0.10335700 | 2.94576900  | 0.65917100  |
| H | 1.69361800  | 4.00214200  | 0.22024600  |
| C | 1.44451300  | 3.88197400  | 2.46342500  |
| H | 0.94946600  | 3.12000300  | 3.08053800  |
| H | 2.52775800  | 3.69463400  | 2.53468300  |
| C | 1.12712000  | 5.26856500  | 3.01492600  |
| H | 1.52164900  | 5.36339500  | 4.03905700  |
| H | 1.58857300  | 6.05921500  | 2.40263800  |
| H | 0.04174300  | 5.43870800  | 3.03805900  |
| H | 0.17815900  | 4.94782000  | 0.82062900  |
| C | -2.83081400 | 5.12560800  | -0.08554200 |
| C | -3.08115100 | 4.56679800  | 1.35997900  |
| O | -1.76118200 | 4.34077200  | 1.82740300  |
| O | -1.68033000 | 4.39741400  | -0.48811800 |
| C | -3.78903100 | 5.52814600  | 2.29899400  |
| H | -4.78600700 | 5.79749300  | 1.91665100  |
| H | -3.91786500 | 5.05398900  | 3.28358200  |
| H | -3.20503600 | 6.44662700  | 2.44287800  |
| C | -3.81104400 | 3.22479500  | 1.33722200  |
| H | -3.34793300 | 2.53304100  | 0.61823000  |
| H | -3.74337800 | 2.77170000  | 2.33769700  |
| H | -4.87430800 | 3.32920600  | 1.07677000  |
| C | -2.48397000 | 6.61334900  | -0.07717300 |
| H | -2.09314900 | 6.88678700  | -1.06832700 |
| H | -3.35845800 | 7.24468000  | 0.13965100  |

|   |             |            |             |
|---|-------------|------------|-------------|
| H | -1.70243300 | 6.82687100 | 0.66687000  |
| C | -3.95524100 | 4.85636600 | -1.06938100 |
| H | -4.89138900 | 5.33426200 | -0.74094600 |
| H | -3.68993000 | 5.26518900 | -2.05605300 |
| H | -4.12841000 | 3.77896200 | -1.18257800 |
| B | -0.93417800 | 4.13351500 | 0.68268500  |

Cartesian coordinates of the optimized geometry of TS-5 at PBE0-D3BJ/def2-SVP level of theory:

|    |             |             |             |
|----|-------------|-------------|-------------|
| Ga | 1.46758400  | 0.15398200  | -0.74425500 |
| Cl | 0.54502800  | -0.00223500 | -2.78328400 |
| Si | -2.19476600 | -1.24525600 | 1.04091800  |
| O  | -0.80943500 | -0.36982100 | 0.71755400  |
| N  | 1.82599800  | 2.08226800  | -0.65117800 |
| N  | 3.34032400  | -0.35667500 | -1.05783200 |
| N  | -3.21128400 | -1.19796300 | -0.54403100 |
| N  | -3.47595100 | 0.11618600  | 1.12911400  |
| C  | 2.72093000  | 2.55925100  | -1.51794300 |
| C  | 3.67049200  | 1.75571600  | -2.16996400 |
| H  | 4.29480000  | 2.26295900  | -2.90547200 |
| C  | 4.04294600  | 0.43219500  | -1.86669700 |
| C  | 2.71389300  | 4.02461300  | -1.84904100 |
| H  | 1.92656200  | 4.21617800  | -2.59562400 |
| H  | 3.67370100  | 4.34253000  | -2.27349000 |
| H  | 2.47779600  | 4.64039800  | -0.97133500 |
| C  | 5.29673300  | -0.07408000 | -2.52392900 |
| H  | 5.13975800  | -0.06488900 | -3.61388400 |
| H  | 5.54684100  | -1.09539500 | -2.21454200 |
| H  | 6.14862000  | 0.58733600  | -2.31387900 |
| C  | 1.01133000  | 2.95066700  | 0.13760000  |
| C  | -0.21107000 | 3.43935700  | -0.36632500 |
| C  | -0.99660500 | 4.25111100  | 0.45889000  |
| H  | -1.94559200 | 4.63622700  | 0.07736900  |
| C  | -0.59573800 | 4.57352200  | 1.74739600  |
| H  | -1.22504900 | 5.20542800  | 2.37858400  |
| C  | 0.61180300  | 4.08380900  | 2.23336100  |
| H  | 0.91995900  | 4.33896800  | 3.24815700  |
| C  | 1.43413800  | 3.27037000  | 1.44930200  |
| C  | -0.71435900 | 3.09773400  | -1.75299100 |
| H  | 0.06922200  | 2.52829800  | -2.27170300 |
| C  | -1.02301100 | 4.34384900  | -2.58193800 |
| H  | -1.86851000 | 4.91377600  | -2.16436700 |
| H  | -1.29458900 | 4.05957300  | -3.61042500 |
| H  | -0.16167000 | 5.02706100  | -2.63401300 |
| C  | -1.93346600 | 2.18202300  | -1.66520400 |
| H  | -1.71764600 | 1.28196500  | -1.07262400 |
| H  | -2.24494400 | 1.86231200  | -2.67140700 |
| H  | -2.77899400 | 2.70837800  | -1.19266100 |
| C  | 2.76180300  | 2.77318800  | 1.99318700  |
| H  | 2.93742400  | 1.78200400  | 1.54548300  |
| C  | 3.92083800  | 3.67365300  | 1.55829300  |
| H  | 3.76138000  | 4.70889900  | 1.89997300  |
| H  | 4.04443100  | 3.69044400  | 0.46741500  |
| H  | 4.86859800  | 3.31695700  | 1.99099700  |
| C  | 2.76170300  | 2.61288600  | 3.51041400  |
| H  | 1.90815300  | 2.01222400  | 3.85819900  |
| H  | 2.72373900  | 3.58625600  | 4.02410800  |
| H  | 3.68362500  | 2.11383900  | 3.83987400  |
| C  | 3.89274600  | -1.52919800 | -0.46368500 |
| C  | 3.35120000  | -2.79871200 | -0.77951200 |
| C  | 3.87223200  | -3.92227600 | -0.13501600 |
| H  | 3.45730700  | -4.90436800 | -0.36339800 |
| C  | 4.90541100  | -3.81579900 | 0.78896000  |
| H  | 5.30033000  | -4.71008500 | 1.27652700  |
| C  | 5.42033300  | -2.56557200 | 1.09762400  |
| H  | 6.22035100  | -2.48106400 | 1.83737000  |
| C  | 4.92098300  | -1.40423100 | 0.49861200  |

|   |             |             |             |
|---|-------------|-------------|-------------|
| C | 2.27466600  | -2.95852200 | -1.83378000 |
| H | 1.59724800  | -2.09547100 | -1.76353000 |
| C | 2.88022800  | -2.90214100 | -3.23685300 |
| H | 3.57137300  | -3.74524000 | -3.39847800 |
| H | 3.43382400  | -1.96757200 | -3.40136500 |
| H | 2.08594200  | -2.95115900 | -3.99689800 |
| C | 1.40546900  | -4.19759200 | -1.65581500 |
| H | 1.97255900  | -5.12804900 | -1.82060500 |
| H | 0.59797500  | -4.18193400 | -2.40276000 |
| H | 0.93470700  | -4.23444600 | -0.66124000 |
| C | 5.48581700  | -0.06755700 | 0.94702100  |
| H | 4.94423200  | 0.73120900  | 0.41840300  |
| C | 6.97262000  | 0.07014800  | 0.61472300  |
| H | 7.57373200  | -0.65659400 | 1.18386600  |
| H | 7.33637200  | 1.07655300  | 0.87530000  |
| H | 7.17495600  | -0.10084400 | -0.45126800 |
| C | 5.26123000  | 0.14225700  | 2.44471900  |
| H | 4.19837800  | 0.05441900  | 2.70938900  |
| H | 5.61223700  | 1.13925400  | 2.75293100  |
| H | 5.81410700  | -0.60052300 | 3.04021900  |
| C | -4.03956400 | -0.30455400 | -0.00561700 |
| C | -5.39198000 | 0.06611200  | -0.49673500 |
| C | -6.51070200 | -0.61857700 | -0.01112200 |
| H | -6.37712100 | -1.42879000 | 0.70928500  |
| C | -7.78691600 | -0.27316000 | -0.45050500 |
| H | -8.65609000 | -0.81391000 | -0.06924100 |
| C | -7.95263800 | 0.75759300  | -1.37412000 |
| H | -8.95369500 | 1.02864700  | -1.71732600 |
| C | -6.83843700 | 1.44050300  | -1.86084100 |
| H | -6.96360300 | 2.24771500  | -2.58597700 |
| C | -5.56102500 | 1.09686200  | -1.42634500 |
| H | -4.68643300 | 1.62889500  | -1.80375800 |
| C | -3.31856800 | -2.05030900 | -1.73169900 |
| C | -4.41455100 | -3.10278400 | -1.54315400 |
| H | -4.22520600 | -3.70157100 | -0.63908800 |
| H | -4.43710900 | -3.78649200 | -2.40514200 |
| H | -5.40702900 | -2.63702600 | -1.45518100 |
| C | -3.59408600 | -1.21182300 | -2.98113400 |
| H | -4.58880000 | -0.74659600 | -2.95898600 |
| H | -3.54635000 | -1.85742100 | -3.87072400 |
| H | -2.82859200 | -0.42986200 | -3.08739300 |
| C | -1.95579000 | -2.72543000 | -1.89504100 |
| H | -1.65214800 | -3.29108900 | -1.00096400 |
| H | -1.18145400 | -1.97190000 | -2.10024400 |
| H | -1.98613900 | -3.42373200 | -2.74451100 |
| C | -3.89898900 | 1.04022200  | 2.17754200  |
| C | -4.94762700 | 0.38112500  | 3.07855900  |
| H | -4.56576600 | -0.57291400 | 3.47327300  |
| H | -5.87728300 | 0.18381500  | 2.52516300  |
| H | -5.19231600 | 1.03509900  | 3.92960600  |
| C | -2.63917900 | 1.34952000  | 2.98929200  |
| H | -2.87218200 | 2.04865300  | 3.80556100  |
| H | -1.86203900 | 1.79274800  | 2.35014500  |
| H | -2.23002300 | 0.43002400  | 3.43743300  |
| C | -4.44306800 | 2.34278900  | 1.59051400  |
| H | -4.63602800 | 3.05811000  | 2.40391000  |
| H | -5.38483700 | 2.19078500  | 1.04649600  |
| H | -3.70624800 | 2.79078500  | 0.90859500  |
| C | 0.55242600  | -0.79187800 | 0.72883200  |
| H | 0.60347300  | -1.87500400 | 0.52736300  |
| C | 1.20836700  | -0.52978200 | 2.07531500  |
| H | 1.12731300  | 0.54358700  | 2.31248300  |
| H | 2.28448200  | -0.75147600 | 1.96552000  |
| C | 0.64048100  | -1.35843000 | 3.21523300  |
| H | -0.41465400 | -1.09994400 | 3.40073600  |
| H | 0.67610300  | -2.42962100 | 2.96682200  |
| H | 1.19030700  | -1.18570000 | 4.15365000  |
| C | -1.81789800 | -3.49292800 | 1.55386700  |
| O | -0.65348000 | -3.68751800 | 1.13641900  |



|   |             |             |            |
|---|-------------|-------------|------------|
| H | -2.68255700 | -3.78147800 | 0.89450200 |
| C | -2.16994300 | -3.70908200 | 3.01924400 |
| H | -1.50235100 | -3.11006400 | 3.65512100 |
| H | -3.20153100 | -3.36016100 | 3.19763100 |
| C | -2.02208700 | -5.18573200 | 3.36792900 |
| H | -2.26599100 | -5.37725400 | 4.42430500 |
| H | -2.68712300 | -5.81180500 | 2.75044000 |
| H | -0.98947700 | -5.51626700 | 3.18337600 |

Cartesian coordinates of the optimized geometry of TS-6 at PBE0-D3BJ/def2-SVP level of theory:

|    |             |             |             |
|----|-------------|-------------|-------------|
| Ga | -1.55606900 | -0.97257400 | -0.70837800 |
| Cl | -0.76492200 | -1.05108400 | -2.80585300 |
| Si | 2.18386900  | 0.63688400  | 0.71001900  |
| O  | 0.77491600  | -0.15624400 | 0.47528700  |
| N  | -1.58054100 | -2.90106500 | -0.27847100 |
| N  | -3.48813400 | -0.84363800 | -1.01643200 |
| N  | 3.18765600  | 0.75583800  | -0.82633100 |
| N  | 3.54581800  | -0.58596700 | 0.82421900  |
| C  | -2.46167200 | -3.66615700 | -0.92674900 |
| C  | -3.55083000 | -3.16341300 | -1.65689800 |
| H  | -4.13181800 | -3.90197800 | -2.20686200 |
| C  | -4.08336000 | -1.86581500 | -1.62979600 |
| C  | -2.30583100 | -5.16098800 | -0.89140500 |
| H  | -3.20413200 | -5.65647400 | -1.27721800 |
| H  | -2.10167400 | -5.52029100 | 0.12645400  |
| H  | -1.44725700 | -5.46435700 | -1.50868000 |
| C  | -5.37882600 | -1.63741600 | -2.35383200 |
| H  | -6.01780500 | -0.90697500 | -1.84275000 |
| H  | -5.92979100 | -2.57422300 | -2.49918300 |
| H  | -5.14340700 | -1.21806800 | -3.34609200 |
| C  | -0.58317500 | -3.53127200 | 0.52633200  |
| C  | 0.57593500  | -4.07211600 | -0.06921400 |
| C  | 1.47880300  | -4.76142600 | 0.74634900  |
| H  | 2.36970500  | -5.20612800 | 0.29644800  |
| C  | 1.26261200  | -4.89810700 | 2.11171000  |
| H  | 1.97909300  | -5.44450900 | 2.72970100  |
| C  | 0.13827500  | -4.32112200 | 2.69113900  |
| H  | -0.01843800 | -4.41446800 | 3.76718000  |
| C  | -0.79918100 | -3.63037200 | 1.91788700  |
| C  | 0.88286700  | -3.90220300 | -1.54401200 |
| H  | -0.01565600 | -3.50669800 | -2.03841100 |
| C  | 1.27003500  | -5.21004500 | -2.23166600 |
| H  | 2.23300500  | -5.59921900 | -1.86413500 |
| H  | 1.37550600  | -5.05074000 | -3.31567900 |
| H  | 0.51834800  | -5.99931800 | -2.07807300 |
| C  | 1.97525200  | -2.85045700 | -1.73326600 |
| H  | 1.69903200  | -1.90067600 | -1.25603100 |
| H  | 2.14049900  | -2.65740100 | -2.80407600 |
| H  | 2.92238700  | -3.19947100 | -1.29065500 |
| C  | -2.04186800 | -3.04488600 | 2.55986000  |
| H  | -2.34475100 | -2.18804100 | 1.93814900  |
| C  | -3.20484100 | -4.03896500 | 2.54360800  |
| H  | -2.93525000 | -4.96651300 | 3.07357100  |
| H  | -3.50250400 | -4.30469200 | 1.51973500  |
| H  | -4.08758500 | -3.60901900 | 3.04179000  |
| C  | -1.79205900 | -2.52335300 | 3.97149600  |
| H  | -0.91431100 | -1.86123100 | 4.00740900  |
| H  | -1.63230200 | -3.34191200 | 4.69081300  |
| H  | -2.66222700 | -1.94953300 | 4.32202200  |
| C  | -4.22786700 | 0.34077300  | -0.71505800 |
| C  | -4.12811200 | 1.47697000  | -1.54073100 |
| C  | -4.83795300 | 2.62468900  | -1.17349600 |
| H  | -4.76064500 | 3.51911300  | -1.79622400 |
| C  | -5.64011600 | 2.64537900  | -0.03987100 |
| H  | -6.18758900 | 3.55202700  | 0.22766100  |
| C  | -5.73683900 | 1.51071400  | 0.75885200  |

|   |             |             |             |
|---|-------------|-------------|-------------|
| H | -6.36136900 | 1.53628100  | 1.65464200  |
| C | -5.02637400 | 0.34838400  | 0.45126000  |
| C | -3.29972100 | 1.47786600  | -2.80803400 |
| H | -2.83512800 | 0.48711000  | -2.90549500 |
| C | -4.17325100 | 1.69321700  | -4.04468200 |
| H | -4.63965800 | 2.69153100  | -4.03984400 |
| H | -4.98329600 | 0.95078500  | -4.10879000 |
| H | -3.56586300 | 1.61465500  | -4.95975700 |
| C | -2.16930500 | 2.50458300  | -2.75417300 |
| H | -2.56119700 | 3.53182000  | -2.82812400 |
| H | -1.47763000 | 2.35143900  | -3.59663900 |
| H | -1.58644300 | 2.45277100  | -1.82308900 |
| C | -5.11583500 | -0.86080000 | 1.36596400  |
| H | -4.28878500 | -1.53336200 | 1.09312900  |
| C | -6.41974500 | -1.63329000 | 1.15858400  |
| H | -7.29168000 | -1.00069300 | 1.39068400  |
| H | -6.45694700 | -2.51495400 | 1.81785700  |
| H | -6.52889400 | -1.98569500 | 0.12359700  |
| C | -4.94001000 | -0.49104800 | 2.83735100  |
| H | -4.00440600 | 0.06007800  | 3.00509100  |
| H | -4.92315100 | -1.39971300 | 3.45859900  |
| H | -5.76859800 | 0.13372700  | 3.20514900  |
| C | 4.06097400  | -0.11469500 | -0.32070600 |
| C | 5.40405800  | -0.42121800 | -0.86610500 |
| C | 6.43643300  | 0.49462000  | -0.64102700 |
| H | 6.23859000  | 1.40565600  | -0.07199600 |
| C | 7.71135000  | 0.24099400  | -1.14234400 |
| H | 8.51569800  | 0.95733300  | -0.96189500 |
| C | 7.95535900  | -0.91863300 | -1.87553700 |
| H | 8.95383400  | -1.11332500 | -2.27341300 |
| C | 6.92328300  | -1.82870400 | -2.10493000 |
| H | 7.10971800  | -2.73458400 | -2.68569900 |
| C | 5.65003400  | -1.58570900 | -1.59927900 |
| H | 4.83699500  | -2.28776400 | -1.78846500 |
| C | 3.12677600  | 1.41615700  | -2.15250600 |
| C | 3.94325700  | 2.70908100  | -2.12788700 |
| H | 3.56647900  | 3.38471600  | -1.34711300 |
| H | 3.85481300  | 3.21850800  | -3.09906500 |
| H | 5.00948300  | 2.50065000  | -1.95236000 |
| C | 3.64955700  | 0.48567100  | -3.24853400 |
| H | 4.73698000  | 0.34300200  | -3.20681800 |
| H | 3.41230700  | 0.93470100  | -4.22349100 |
| H | 3.15253300  | -0.49448400 | -3.20282500 |
| C | 1.65297500  | 1.70571800  | -2.43794100 |
| H | 1.21659500  | 2.36808000  | -1.67772000 |
| H | 1.07219500  | 0.77459500  | -2.49753900 |
| H | 1.56851800  | 2.21850200  | -3.40728700 |
| C | 4.11142800  | -1.43803000 | 1.87986000  |
| C | 5.24332600  | -0.71098600 | 2.60893800  |
| H | 4.90238900  | 0.25602300  | 3.00549200  |
| H | 6.09426600  | -0.52942200 | 1.93611500  |
| H | 5.60359500  | -1.31851800 | 3.45256100  |
| C | 2.95108500  | -1.73673600 | 2.82905500  |
| H | 3.28428200  | -2.40382500 | 3.63659500  |
| H | 2.12916900  | -2.22928700 | 2.29088700  |
| H | 2.56488000  | -0.81880000 | 3.29185600  |
| C | 4.62482100  | -2.76220400 | 1.31379300  |
| H | 4.89042200  | -3.42989800 | 2.14651000  |
| H | 5.52072900  | -2.62982500 | 0.69433900  |
| H | 3.84205400  | -3.25460500 | 0.72170000  |
| C | -0.58737100 | 0.33286900  | 0.44411200  |
| H | -0.58803800 | 1.30387600  | -0.07716800 |
| C | -1.13033300 | 0.57277100  | 1.84981400  |
| H | -0.27038000 | 0.82480100  | 2.48695900  |
| H | -1.58204800 | -0.33606400 | 2.27779100  |
| C | -2.09374300 | 1.74658700  | 1.89271700  |
| H | -1.57556900 | 2.64561700  | 1.53040400  |
| H | -2.97630400 | 1.58804600  | 1.25812800  |
| H | -2.44984900 | 1.92897300  | 2.91825800  |

|   |             |            |             |
|---|-------------|------------|-------------|
| C | 2.19838100  | 2.07413500 | 1.95048400  |
| O | 1.00890700  | 2.72350900 | 1.66531400  |
| H | 3.08485900  | 2.69601800 | 1.70019100  |
| C | 2.27397300  | 1.74273000 | 3.43795200  |
| H | 1.47185200  | 1.03459000 | 3.70876400  |
| H | 3.22984800  | 1.24088600 | 3.65970000  |
| C | 2.13717000  | 3.00272800 | 4.27896100  |
| H | 2.17625500  | 2.77091000 | 5.35422100  |
| H | 2.94157800  | 3.71867400 | 4.04865000  |
| H | 1.18582700  | 3.50287900 | 4.05420600  |
| H | 1.99046600  | 3.27826100 | -0.20104000 |
| C | -0.57376300 | 5.16616200 | -0.17192500 |
| C | 0.24602000  | 5.81580800 | 0.99812200  |
| O | 1.43175200  | 5.05808500 | 0.98514200  |
| O | -0.22769600 | 3.80230700 | -0.05798800 |
| C | 0.58863100  | 7.28335600 | 0.79085400  |
| H | -0.31858700 | 7.89897600 | 0.68228000  |
| H | 1.15187600  | 7.65589200 | 1.66007800  |
| H | 1.21917500  | 7.41856600 | -0.09779100 |
| C | -0.45277700 | 5.63966100 | 2.35013100  |
| H | -0.75480800 | 4.59311900 | 2.49658700  |
| H | 0.26484600  | 5.89657900 | 3.14376800  |
| H | -1.33673700 | 6.28742100 | 2.45764200  |
| C | -0.10962400 | 5.67316400 | -1.53875700 |
| H | -0.54128700 | 5.02885300 | -2.31907800 |
| H | -0.42177700 | 6.71074200 | -1.73339500 |
| H | 0.98602100  | 5.61327600 | -1.61340500 |
| C | -2.08153000 | 5.32484000 | -0.04611100 |
| H | -2.36764600 | 6.38841700 | -0.02458300 |
| H | -2.58178700 | 4.85424300 | -0.90479700 |
| H | -2.46022700 | 4.83927000 | 0.86267800  |
| B | 1.09380000  | 3.71647700 | 0.55408800  |

Cartesian coordinates of the optimized geometry of TS-7 at PBE0-D3BJ/def2-SVP level of theory:

|    |             |             |             |
|----|-------------|-------------|-------------|
| Ga | 2.32547900  | -0.25885600 | -0.49209800 |
| Cl | 1.42334300  | 0.29871800  | -2.45940400 |
| Si | -1.58454400 | 0.67713400  | 0.50075100  |
| O  | 0.06598000  | 0.68443700  | 0.86341100  |
| N  | 3.87501100  | 0.94483800  | -0.34268100 |
| N  | 3.38513700  | -1.85284400 | -0.97769100 |
| N  | -2.17622600 | 1.55489600  | -1.01254900 |
| N  | -1.58398900 | 2.65673300  | 0.75043500  |
| C  | 4.92365100  | 0.74572700  | -1.13760400 |
| C  | 5.16124800  | -0.45559600 | -1.82623700 |
| H  | 6.04208500  | -0.46291000 | -2.46666400 |
| C  | 4.50682800  | -1.68821100 | -1.67963000 |
| C  | 5.92072700  | 1.85008700  | -1.34882800 |
| H  | 6.91632500  | 1.44621300  | -1.57045700 |
| H  | 5.98009800  | 2.52694700  | -0.48763300 |
| H  | 5.60033700  | 2.44967600  | -2.21581900 |
| C  | 5.12486000  | -2.87249100 | -2.36786600 |
| H  | 5.10025200  | -3.77027100 | -1.73595300 |
| H  | 6.15954600  | -2.66213900 | -2.66262200 |
| H  | 4.54768300  | -3.10821400 | -3.27523300 |
| C  | 3.77095400  | 2.11721900  | 0.46841800  |
| C  | 3.22474100  | 3.30335300  | -0.06019400 |
| C  | 3.08784400  | 4.40597200  | 0.79021500  |
| H  | 2.65952000  | 5.33138400  | 0.39740800  |
| C  | 3.48078000  | 4.34432000  | 2.11988000  |
| H  | 3.35758100  | 5.21385700  | 2.76958600  |
| C  | 4.03155500  | 3.17021600  | 2.62427600  |
| H  | 4.34219700  | 3.13155800  | 3.66955100  |
| C  | 4.19035900  | 2.04146100  | 1.81707500  |
| C  | 2.78750300  | 3.41939800  | -1.50624600 |
| H  | 3.01369700  | 2.46774300  | -2.00683400 |
| C  | 3.53027900  | 4.53689700  | -2.23926200 |

|   |             |             |             |
|---|-------------|-------------|-------------|
| H | 3.27395500  | 5.52697900  | -1.82966300 |
| H | 3.25754600  | 4.54152900  | -3.30605000 |
| H | 4.62226900  | 4.42595200  | -2.16651000 |
| C | 1.27810800  | 3.61997000  | -1.60991100 |
| H | 0.72892600  | 2.86337000  | -1.03235600 |
| H | 0.95467400  | 3.54225200  | -2.65918200 |
| H | 0.99421100  | 4.61676600  | -1.23674500 |
| C | 4.83639700  | 0.78086300  | 2.36346500  |
| H | 4.36218200  | -0.06573700 | 1.84360000  |
| C | 6.33042200  | 0.72592500  | 2.03497900  |
| H | 6.85560600  | 1.59505300  | 2.46207700  |
| H | 6.51784100  | 0.71423400  | 0.95363800  |
| H | 6.78297600  | -0.18503300 | 2.45742600  |
| C | 4.62749000  | 0.58550000  | 3.86159600  |
| H | 3.56988500  | 0.67646100  | 4.14711200  |
| H | 5.20363100  | 1.31471100  | 4.45260300  |
| H | 4.97557700  | -0.41428800 | 4.16235000  |
| C | 2.89422400  | -3.16916200 | -0.71979600 |
| C | 2.09397400  | -3.84433800 | -1.66565100 |
| C | 1.66804000  | -5.14308600 | -1.36524700 |
| H | 1.05093200  | -5.68015900 | -2.08945900 |
| C | 2.01071600  | -5.76012300 | -0.16972000 |
| H | 1.67349700  | -6.77818100 | 0.03930900  |
| C | 2.77899400  | -5.07369100 | 0.76439800  |
| H | 3.03787900  | -5.55907700 | 1.70712500  |
| C | 3.23233700  | -3.77680200 | 0.51155300  |
| C | 1.66482500  | -3.21565500 | -2.97704100 |
| H | 2.18463100  | -2.25201800 | -3.07984600 |
| C | 2.02001200  | -4.08495900 | -4.18336400 |
| H | 1.44132100  | -5.02201000 | -4.19585600 |
| H | 3.08589600  | -4.35867200 | -4.19828200 |
| H | 1.79316200  | -3.54886400 | -5.11751900 |
| C | 0.16877800  | -2.90513100 | -2.95959600 |
| H | -0.43137100 | -3.82279500 | -2.84585500 |
| H | -0.13608500 | -2.41054700 | -3.89386800 |
| H | -0.08146400 | -2.22015600 | -2.13886700 |
| C | 4.10943100  | -3.06132400 | 1.52079200  |
| H | 3.94859800  | -1.98338900 | 1.36665500  |
| C | 5.59534300  | -3.32269500 | 1.26674500  |
| H | 5.81906400  | -4.39990800 | 1.32458800  |
| H | 6.21080700  | -2.80708300 | 2.02070800  |
| H | 5.91315700  | -2.96142500 | 0.27927900  |
| C | 3.74798800  | -3.38704700 | 2.96689000  |
| H | 2.66961200  | -3.27744400 | 3.15454000  |
| H | 4.28123900  | -2.71089900 | 3.65197500  |
| H | 4.03567500  | -4.41418400 | 3.24042900  |
| C | -2.15838900 | 2.76943900  | -0.42279700 |
| C | -2.79829100 | 4.00312700  | -0.95442300 |
| C | -4.09268900 | 4.31578400  | -0.52511100 |
| H | -4.62008500 | 3.62671300  | 0.13824400  |
| C | -4.71090100 | 5.48655400  | -0.95674100 |
| H | -5.72320800 | 5.71984100  | -0.61920500 |
| C | -4.04115100 | 6.35381500  | -1.81877900 |
| H | -4.52548500 | 7.27314500  | -2.15603900 |
| C | -2.75294200 | 6.04263700  | -2.25145800 |
| H | -2.22327400 | 6.71797700  | -2.92721100 |
| C | -2.13277000 | 4.87155700  | -1.82313900 |
| H | -1.12052900 | 4.63536100  | -2.15113700 |
| C | -2.77980600 | 1.17490700  | -2.30432200 |
| C | -4.28744200 | 1.44513600  | -2.31025700 |
| H | -4.74364700 | 0.97682600  | -1.42525400 |
| H | -4.73784600 | 0.99935900  | -3.21032400 |
| H | -4.51826100 | 2.51865100  | -2.32155200 |
| C | -2.07170100 | 1.90719100  | -3.44750700 |
| H | -2.25229400 | 2.98933900  | -3.41889600 |
| H | -2.44824200 | 1.53632500  | -4.41274300 |
| H | -0.98840100 | 1.72022600  | -3.40113000 |
| C | -2.57355500 | -0.32381500 | -2.49835200 |
| H | -3.19960200 | -0.89221300 | -1.79772800 |

|   |             |             |             |
|---|-------------|-------------|-------------|
| H | -1.51376300 | -0.58717800 | -2.38148500 |
| H | -2.88440500 | -0.59824800 | -3.51714700 |
| C | -1.32776200 | 3.63767400  | 1.80783100  |
| C | -2.56767800 | 3.81204000  | 2.69339700  |
| H | -2.87138800 | 2.85967800  | 3.14917400  |
| H | -3.41520800 | 4.20787300  | 2.11595900  |
| H | -2.35183800 | 4.52248100  | 3.50605600  |
| C | -0.17762100 | 3.08920500  | 2.65531900  |
| H | 0.04258900  | 3.78459200  | 3.47895300  |
| H | 0.72712500  | 2.95603500  | 2.04780200  |
| H | -0.43488100 | 2.11195900  | 3.08531200  |
| C | -0.90596700 | 5.00586800  | 1.26517700  |
| H | -0.55961700 | 5.62995100  | 2.10257500  |
| H | -1.72885600 | 5.53785100  | 0.77142700  |
| H | -0.07535300 | 4.90065600  | 0.55498500  |
| C | 0.96974800  | -0.39180900 | 0.96096400  |
| H | 0.44716000  | -1.34433500 | 0.76600900  |
| C | 1.54916100  | -0.42930300 | 2.36775400  |
| H | 1.96000500  | 0.56886500  | 2.58604400  |
| H | 2.39990200  | -1.12579600 | 2.39234600  |
| C | 0.55131000  | -0.82047100 | 3.44509400  |
| H | -0.32714700 | -0.16127800 | 3.43371300  |
| H | 0.18797800  | -1.85115200 | 3.30300000  |
| H | 0.99883500  | -0.76289200 | 4.44951300  |
| C | -3.21600800 | 0.46360000  | 1.52752800  |
| O | -4.10115400 | -0.25397800 | 0.70888500  |
| H | -3.61389200 | 1.49497000  | 1.54566500  |
| C | -3.11646400 | 0.02796900  | 2.98599900  |
| H | -2.72998100 | -1.00008100 | 3.05327400  |
| H | -2.35615300 | 0.67010700  | 3.46651000  |
| C | -4.43323200 | 0.14206500  | 3.74161900  |
| H | -4.31029900 | -0.14106700 | 4.79888400  |
| H | -4.81418900 | 1.17695800  | 3.71312400  |
| H | -5.19084700 | -0.51650900 | 3.29418900  |
| H | -1.52954600 | -0.86051100 | 0.03783800  |
| C | -6.09497300 | -2.63569900 | -0.50032100 |
| C | -6.22754800 | -3.04273700 | 1.00952500  |
| O | -5.43162700 | -2.06535700 | 1.64990900  |
| O | -4.76494900 | -2.15625200 | -0.56036900 |
| C | -7.64084900 | -2.97114200 | 1.56353400  |
| H | -8.32060500 | -3.64025500 | 1.01314200  |
| H | -7.63972400 | -3.27879900 | 2.62008000  |
| H | -8.03178100 | -1.94674800 | 1.51299400  |
| C | -5.63638100 | -4.42603900 | 1.28629300  |
| H | -4.64106200 | -4.52471500 | 0.83105200  |
| H | -5.52429000 | -4.54540500 | 2.37391000  |
| H | -6.27726200 | -5.23690300 | 0.90859900  |
| C | -7.03025700 | -1.48433200 | -0.86780900 |
| H | -6.73219300 | -1.09298000 | -1.85173900 |
| H | -8.08363100 | -1.79827800 | -0.92072300 |
| H | -6.93547200 | -0.66778500 | -0.13761800 |
| C | -6.26239900 | -3.77830100 | -1.48720400 |
| H | -7.25961900 | -4.23716900 | -1.40137600 |
| H | -6.14893200 | -3.39905200 | -2.51407600 |
| H | -5.50214300 | -4.55495300 | -1.32993700 |
| B | -4.42419200 | -1.63727800 | 0.73500100  |
| C | -2.17321500 | -2.52599600 | 0.28625200  |
| H | -2.46246300 | -2.40921900 | -0.76958700 |
| O | -3.04969100 | -2.38339600 | 1.16654000  |
| C | -0.98708200 | -3.37088600 | 0.61537900  |
| H | -0.16978700 | -3.19788100 | -0.09620600 |
| H | -0.63602200 | -3.12203300 | 1.62653000  |
| C | -1.42688000 | -4.83555800 | 0.56058800  |
| H | -0.57636500 | -5.48907600 | 0.79599400  |
| H | -2.23375300 | -5.02663000 | 1.28235900  |
| H | -1.79354600 | -5.10647600 | -0.44173500 |

Cartesian coordinates of the optimized geometry of TS-8 at PBE0-D3BJ/def2-SVP level of theory:

|    |             |             |             |
|----|-------------|-------------|-------------|
| Ga | -1.80423300 | -0.84023900 | -0.74916800 |
| Cl | -0.85085500 | -1.02569300 | -2.75815400 |
| Si | 2.19453200  | -0.10190300 | 0.69628500  |
| O  | 0.65434900  | -0.57128600 | 0.53932000  |
| N  | -2.57673100 | -2.64672500 | -0.53401200 |
| N  | -3.51312700 | 0.02963000  | -1.15828500 |
| N  | 3.20116800  | -0.44931000 | -0.78677700 |
| N  | 3.17075800  | -1.65414500 | 0.99847900  |
| C  | -3.55664400 | -2.98444300 | -1.37327700 |
| C  | -4.33600100 | -2.04849800 | -2.07126200 |
| H  | -5.07495200 | -2.46553000 | -2.75387400 |
| C  | -4.39058500 | -0.65448300 | -1.89140700 |
| C  | -3.83933400 | -4.43734700 | -1.63255900 |
| H  | -4.87212900 | -4.59059200 | -1.96838100 |
| H  | -3.64077300 | -5.06240100 | -0.75288400 |
| H  | -3.16643400 | -4.78279000 | -2.43455100 |
| C  | -5.49985100 | 0.08781500  | -2.57937100 |
| H  | -6.00798500 | 0.77803500  | -1.89214800 |
| H  | -6.23294600 | -0.60344900 | -3.01081000 |
| H  | -5.07828900 | 0.70796300  | -3.38567900 |
| C  | -1.97431300 | -3.61275400 | 0.32858600  |
| C  | -0.84360900 | -4.34331900 | -0.08781600 |
| C  | -0.24239800 | -5.21932900 | 0.82320800  |
| H  | 0.63768700  | -5.78819700 | 0.51223200  |
| C  | -0.74586800 | -5.38520700 | 2.10595200  |
| H  | -0.26151200 | -6.07302700 | 2.80312900  |
| C  | -1.87580000 | -4.67442000 | 2.49792300  |
| H  | -2.27161500 | -4.81218800 | 3.50556600  |
| C  | -2.50750600 | -3.78202100 | 1.62886400  |
| C  | -0.26642800 | -4.21768100 | -1.48216700 |
| H  | -0.91084100 | -3.53872600 | -2.05705400 |
| C  | -0.22990500 | -5.56263000 | -2.20722400 |
| H  | 0.46738800  | -6.26735600 | -1.72618700 |
| H  | 0.10364800  | -5.42653600 | -3.24774400 |
| H  | -1.21975800 | -6.04283000 | -2.22718700 |
| C  | 1.11805600  | -3.57634100 | -1.44473200 |
| H  | 1.09474100  | -2.60681800 | -0.92906600 |
| H  | 1.48837500  | -3.40552100 | -2.46735100 |
| H  | 1.83382800  | -4.22988500 | -0.91966100 |
| C  | -3.75003400 | -3.03104200 | 2.06954000  |
| H  | -3.76512600 | -2.09000700 | 1.49975500  |
| C  | -5.02624800 | -3.79467200 | 1.70830500  |
| H  | -5.04057400 | -4.78346900 | 2.19426200  |
| H  | -5.12429000 | -3.94837400 | 0.62588500  |
| H  | -5.91497300 | -3.23801400 | 2.04442400  |
| C  | -3.75216900 | -2.68068700 | 3.55414000  |
| H  | -2.83024000 | -2.16313200 | 3.85600200  |
| H  | -3.86401600 | -3.57495100 | 4.18703500  |
| H  | -4.60309100 | -2.02199400 | 3.78328700  |
| C  | -3.75858900 | 1.40961300  | -0.86504100 |
| C  | -3.34224300 | 2.41649000  | -1.75830500 |
| C  | -3.64189000 | 3.74557700  | -1.44187000 |
| H  | -3.31513100 | 4.53800700  | -2.11870300 |
| C  | -4.32987600 | 4.07565500  | -0.28233900 |
| H  | -4.55349100 | 5.12055000  | -0.05523900 |
| C  | -4.70740800 | 3.07331100  | 0.60435700  |
| H  | -5.22264500 | 3.34047700  | 1.52876700  |
| C  | -4.42131800 | 1.73203100  | 0.33987000  |
| C  | -2.53373700 | 2.11057600  | -3.00086300 |
| H  | -2.54656200 | 1.02228000  | -3.15803100 |
| C  | -3.10401200 | 2.76716300  | -4.25653300 |
| H  | -3.03649000 | 3.86553500  | -4.21200200 |
| H  | -4.16217800 | 2.50635900  | -4.41680800 |
| H  | -2.53697000 | 2.44259200  | -5.14245400 |
| C  | -1.07803700 | 2.51743800  | -2.77678600 |
| H  | -0.97744900 | 3.60307800  | -2.63275900 |
| H  | -0.45484000 | 2.21923700  | -3.63341700 |

|   |             |             |             |
|---|-------------|-------------|-------------|
| H | -0.65118800 | 2.05292200  | -1.87837700 |
| C | -4.82145500 | 0.65442900  | 1.32844600  |
| H | -4.14121000 | -0.19278300 | 1.15306900  |
| C | -6.23967800 | 0.13898800  | 1.08064000  |
| H | -6.97278100 | 0.95792000  | 1.15694100  |
| H | -6.50882100 | -0.62658900 | 1.82579400  |
| H | -6.34232200 | -0.31775200 | 0.08633100  |
| C | -4.64956500 | 1.09563000  | 2.77924100  |
| H | -3.65519500 | 1.53152200  | 2.95464800  |
| H | -4.77287400 | 0.23768300  | 3.45668300  |
| H | -5.39964000 | 1.84702800  | 3.07101600  |
| C | 3.79946000  | -1.46785900 | -0.16172300 |
| C | 4.99521300  | -2.20834500 | -0.62922000 |
| C | 6.26261100  | -1.73835500 | -0.27407000 |
| H | 6.35731100  | -0.82953500 | 0.32427300  |
| C | 7.40049100  | -2.42750000 | -0.68943500 |
| H | 8.38926300  | -2.05606800 | -0.41174500 |
| C | 7.27536600  | -3.58304000 | -1.45790000 |
| H | 8.16800400  | -4.12168900 | -1.78381300 |
| C | 6.00953200  | -4.04971200 | -1.81348000 |
| H | 5.90826600  | -4.95293800 | -2.41903100 |
| C | 4.86984800  | -3.36644600 | -1.40196600 |
| H | 3.87846400  | -3.72436200 | -1.68174200 |
| C | 3.50846700  | 0.23055700  | -2.06141000 |
| C | 4.67396400  | 1.19250800  | -1.83197100 |
| H | 4.42275100  | 1.88635500  | -1.01863400 |
| H | 4.86368400  | 1.78440800  | -2.73942100 |
| H | 5.59676600  | 0.64688300  | -1.58223100 |
| C | 3.84470600  | -0.77629500 | -3.16139300 |
| H | 4.81082300  | -1.27416900 | -3.00914600 |
| H | 3.89630400  | -0.23886800 | -4.11915500 |
| H | 3.05456300  | -1.53732500 | -3.24610600 |
| C | 2.24951100  | 0.99167000  | -2.46881100 |
| H | 1.97920100  | 1.75665700  | -1.72869000 |
| H | 1.40579300  | 0.29959000  | -2.59985000 |
| H | 2.42740200  | 1.49899700  | -3.42841200 |
| C | 3.43178100  | -2.54258900 | 2.13452800  |
| C | 4.55414500  | -1.95591400 | 2.99531000  |
| H | 4.30690000  | -0.93157400 | 3.31280800  |
| H | 5.50285600  | -1.92904200 | 2.43932000  |
| H | 4.70702300  | -2.56705400 | 3.89759600  |
| C | 2.13101700  | -2.59495400 | 2.93420700  |
| H | 2.24819600  | -3.25332600 | 3.80672500  |
| H | 1.30365100  | -2.97284800 | 2.31622400  |
| H | 1.85635600  | -1.59692800 | 3.30452200  |
| C | 3.79077800  | -3.96079500 | 1.69155100  |
| H | 3.82369600  | -4.61302900 | 2.57649500  |
| H | 4.77089500  | -4.01350300 | 1.20119700  |
| H | 3.02830400  | -4.35719500 | 1.00572900  |
| C | -0.68746400 | -0.10590100 | 0.72048200  |
| H | -0.67268500 | 0.99382400  | 0.66479100  |
| C | -1.21229800 | -0.53777200 | 2.08075600  |
| H | -1.14235600 | -1.63461600 | 2.16281900  |
| H | -2.28781300 | -0.29964200 | 2.10503300  |
| C | -0.54153900 | 0.11534000  | 3.27628000  |
| H | 0.52552600  | -0.13788700 | 3.32991500  |
| H | -0.60588900 | 1.20908000  | 3.21624000  |
| H | -1.00198600 | -0.21675200 | 4.21994100  |
| C | 2.85638800  | 1.40909800  | 1.53352500  |
| O | 2.34923000  | 2.19279600  | 0.46883400  |
| H | 3.96226800  | 1.33677800  | 1.42138500  |
| C | 2.56961100  | 1.80616800  | 2.97322500  |
| H | 1.51420000  | 2.10103500  | 3.04466200  |
| H | 2.69543300  | 0.90614600  | 3.60277200  |
| C | 3.46919400  | 2.91971400  | 3.48914800  |
| H | 3.23383200  | 3.15810100  | 4.53820500  |
| H | 4.53217300  | 2.62812000  | 3.44229600  |
| H | 3.31857400  | 3.82509200  | 2.88499600  |
| H | -1.77446900 | 2.94942200  | 0.65466000  |

|   |             |            |             |
|---|-------------|------------|-------------|
| C | 1.89438700  | 4.95869100 | -1.02747900 |
| C | 2.11688100  | 5.58268300 | 0.40779900  |
| O | 1.96774700  | 4.48195700 | 1.26927800  |
| O | 1.10546500  | 3.82449800 | -0.76621700 |
| C | 3.49829800  | 6.19587300 | 0.61703400  |
| H | 3.69251600  | 7.01626600 | -0.09184000 |
| H | 3.56285500  | 6.60603700 | 1.63651300  |
| H | 4.28893600  | 5.44214500 | 0.50998400  |
| C | 1.06968900  | 6.64111400 | 0.76015300  |
| H | 0.05000900  | 6.26585700 | 0.60043200  |
| H | 1.17112400  | 6.89149900 | 1.82637300  |
| H | 1.19753100  | 7.56372200 | 0.17390500  |
| C | 3.21033500  | 4.52478700 | -1.67369300 |
| H | 2.98408500  | 3.93964500 | -2.57690100 |
| H | 3.83636100  | 5.38197500 | -1.96352200 |
| H | 3.77914700  | 3.88382500 | -0.98917800 |
| C | 1.14567500  | 5.86104800 | -1.99973600 |
| H | 1.68223900  | 6.80730000 | -2.17102700 |
| H | 1.04269500  | 5.34740600 | -2.96784700 |
| H | 0.13627400  | 6.08896800 | -1.63260800 |
| B | 1.36624000  | 3.34710600 | 0.57518000  |
| C | -1.00463200 | 3.52808200 | 1.20174500  |
| H | -0.87971500 | 4.46345200 | 0.62958200  |
| O | 0.18743700  | 2.80212300 | 1.23098700  |
| C | -1.53708000 | 3.83164300 | 2.59546900  |
| H | -2.52487900 | 4.31280400 | 2.48504900  |
| H | -1.73027900 | 2.87398300 | 3.10950200  |
| C | -0.61761200 | 4.68995900 | 3.44754800  |
| H | -0.97417800 | 4.75688000 | 4.48754500  |
| H | 0.40426700  | 4.28352700 | 3.44724400  |
| H | -0.54742400 | 5.71291900 | 3.04924800  |

Cartesian coordinates of the optimized geometry of TS-9 at PBE0-D3BJ/def2-SVP level of theory:

|    |             |             |             |
|----|-------------|-------------|-------------|
| Ga | -1.71233600 | -0.91714000 | -0.71656000 |
| Cl | -0.75580000 | -1.25902400 | -2.71355800 |
| Si | 2.17614400  | 0.08988100  | 0.57759300  |
| O  | 0.68101500  | -0.62388000 | 0.71403200  |
| N  | -2.44280400 | -2.72191400 | -0.33492300 |
| N  | -3.45457800 | -0.16081100 | -1.24286300 |
| N  | 3.14971900  | -0.37150100 | -0.90440300 |
| N  | 3.15989400  | -1.54130400 | 0.89841700  |
| C  | -3.39326900 | -3.17554900 | -1.14940300 |
| C  | -4.16397100 | -2.34603300 | -1.98307600 |
| H  | -4.85953200 | -2.85890100 | -2.64564800 |
| C  | -4.26523200 | -0.94752600 | -1.95558000 |
| C  | -3.66361600 | -4.65167100 | -1.23211500 |
| H  | -4.69326300 | -4.84845300 | -1.55484300 |
| H  | -3.47040200 | -5.16346200 | -0.28121600 |
| H  | -2.98408800 | -5.08999900 | -1.98083300 |
| C  | -5.34614800 | -0.31695300 | -2.78710200 |
| H  | -5.94447400 | 0.39595200  | -2.20372000 |
| H  | -6.00747500 | -1.07627300 | -3.22017500 |
| H  | -4.88477600 | 0.26019100  | -3.60364300 |
| C  | -1.81386000 | -3.59303600 | 0.60868500  |
| C  | -0.70178400 | -4.36990500 | 0.22819100  |
| C  | -0.08022300 | -5.16428300 | 1.19755800  |
| H  | 0.78790900  | -5.76549400 | 0.91594700  |
| C  | -0.54445300 | -5.20323700 | 2.50472200  |
| H  | -0.04187200 | -5.82515800 | 3.24914700  |
| C  | -1.65620100 | -4.44776400 | 2.86220100  |
| H  | -2.02136400 | -4.48787600 | 3.88957800  |
| C  | -2.31112700 | -3.63664900 | 1.93230100  |
| C  | -0.15888700 | -4.36909500 | -1.18529700 |
| H  | -0.82485200 | -3.75567100 | -1.80747500 |
| C  | -0.10956800 | -5.77422200 | -1.78461400 |
| H  | 0.61578900  | -6.41588500 | -1.25920200 |



|   |             |             |             |
|---|-------------|-------------|-------------|
| H | 0.19786400  | -5.72730600 | -2.84091500 |
| H | -1.08705500 | -6.27731300 | -1.73618400 |
| C | 1.21442600  | -3.70733100 | -1.23259000 |
| H | 1.19170100  | -2.70402600 | -0.78586200 |
| H | 1.55734800  | -3.61284600 | -2.27426500 |
| H | 1.95134300  | -4.30946600 | -0.67759500 |
| C | -3.54795500 | -2.85381300 | 2.33369200  |
| H | -3.55918000 | -1.94596700 | 1.71260800  |
| C | -4.83090500 | -3.62752700 | 2.02148400  |
| H | -4.84357700 | -4.59395200 | 2.55037300  |
| H | -4.94357800 | -3.82661000 | 0.94772100  |
| H | -5.71342100 | -3.05307600 | 2.34419800  |
| C | -3.54029600 | -2.41832800 | 3.79556000  |
| H | -2.60998500 | -1.89701200 | 4.06398700  |
| H | -3.66173200 | -3.27342300 | 4.47887000  |
| H | -4.37972200 | -1.73448300 | 3.98947400  |
| C | -3.81723600 | 1.21013300  | -1.05950000 |
| C | -3.38788300 | 2.19842700  | -1.96722400 |
| C | -3.82863500 | 3.51222700  | -1.77624500 |
| H | -3.49761300 | 4.28871900  | -2.46955900 |
| C | -4.67660100 | 3.84542300  | -0.72919700 |
| H | -5.01848100 | 4.87568300  | -0.60511900 |
| C | -5.07040700 | 2.86525000  | 0.17530900  |
| H | -5.71857500 | 3.13503100  | 1.01158100  |
| C | -4.63989800 | 1.54354900  | 0.04060700  |
| C | -2.44037400 | 1.89177700  | -3.10665000 |
| H | -2.34982800 | 0.79919900  | -3.19127700 |
| C | -2.94114100 | 2.41823800  | -4.45029300 |
| H | -2.96382000 | 3.51910800  | -4.47942500 |
| H | -3.95669100 | 2.05960500  | -4.67997400 |
| H | -2.27324800 | 2.08419700  | -5.25902300 |
| C | -1.04916000 | 2.43606900  | -2.78582800 |
| H | -1.05577700 | 3.53070100  | -2.66922500 |
| H | -0.34000300 | 2.17782400  | -3.58585100 |
| H | -0.65455200 | 2.02177700  | -1.84815700 |
| C | -5.06639600 | 0.49882600  | 1.05387400  |
| H | -4.34196700 | -0.32538400 | 0.97494300  |
| C | -6.44401400 | -0.08489500 | 0.73636700  |
| H | -7.21047200 | 0.70657300  | 0.71576900  |
| H | -6.73757500 | -0.82000400 | 1.50216600  |
| H | -6.45859400 | -0.59785400 | -0.23519000 |
| C | -5.02127500 | 1.02537000  | 2.48617000  |
| H | -4.05248100 | 1.49240300  | 2.71739400  |
| H | -5.18312200 | 0.20342600  | 3.19929100  |
| H | -5.80689200 | 1.77366700  | 2.67375300  |
| C | 3.75495200  | -1.39076100 | -0.26462700 |
| C | 4.96224700  | -2.11608300 | -0.73818000 |
| C | 6.21943800  | -1.56750500 | -0.46549600 |
| H | 6.28830100  | -0.61408900 | 0.06308400  |
| C | 7.37581700  | -2.23466600 | -0.86474800 |
| H | 8.35411400  | -1.80072300 | -0.64615500 |
| C | 7.28286100  | -3.44949000 | -1.54115900 |
| H | 8.18943400  | -3.97196400 | -1.85504900 |
| C | 6.02969200  | -3.99601100 | -1.81742300 |
| H | 5.95149200  | -4.94696200 | -2.34910200 |
| C | 4.87227300  | -3.33462900 | -1.41713400 |
| H | 3.89164400  | -3.76054900 | -1.63045500 |
| C | 3.34810000  | 0.15683200  | -2.26116100 |
| C | 4.63068700  | 0.99114500  | -2.31535600 |
| H | 4.61913900  | 1.76851900  | -1.53881300 |
| H | 4.72378500  | 1.48669000  | -3.29363300 |
| H | 5.52128300  | 0.36284300  | -2.16933900 |
| C | 3.40224500  | -0.96584900 | -3.29944900 |
| H | 4.30765400  | -1.58036400 | -3.21296400 |
| H | 3.39636100  | -0.52263600 | -4.30644000 |
| H | 2.51448900  | -1.60857100 | -3.20897000 |
| C | 2.12849900  | 1.02055100  | -2.56836300 |
| H | 1.98082800  | 1.79352100  | -1.80575700 |
| H | 1.22700400  | 0.39439600  | -2.60993500 |

|   |             |             |             |
|---|-------------|-------------|-------------|
| H | 2.25317900  | 1.50803400  | -3.54661000 |
| C | 3.50312900  | -2.31597000 | 2.08866500  |
| C | 4.63760000  | -1.61851600 | 2.84781800  |
| H | 4.36505000  | -0.57824200 | 3.07717400  |
| H | 5.56358000  | -1.61430800 | 2.25386400  |
| H | 4.84444800  | -2.14038700 | 3.79476600  |
| C | 2.24225100  | -2.34149900 | 2.95397200  |
| H | 2.42268800  | -2.91971200 | 3.87200600  |
| H | 1.40103600  | -2.78930200 | 2.40664300  |
| H | 1.94923300  | -1.32227300 | 3.24328900  |
| C | 3.90229900  | -3.75507100 | 1.76003500  |
| H | 4.01578700  | -4.32036500 | 2.69705600  |
| H | 4.85463900  | -3.81261800 | 1.21741600  |
| H | 3.12266600  | -4.24543300 | 1.15990500  |
| C | -0.60492300 | -0.02031300 | 0.67425200  |
| H | -0.50100700 | 1.05040500  | 0.43231800  |
| C | -1.29826200 | -0.15611500 | 2.02290300  |
| H | -1.39511400 | -1.22756500 | 2.25747300  |
| H | -2.32475100 | 0.23128100  | 1.90456300  |
| C | -0.62343900 | 0.55321700  | 3.18386300  |
| H | 0.35044800  | 0.09689100  | 3.40606500  |
| H | -0.45019600 | 1.61345200  | 2.95417800  |
| H | -1.23505400 | 0.48087300  | 4.09737100  |
| C | 2.89399000  | 1.48282400  | 1.51591400  |
| O | 1.85365300  | 1.81459500  | 0.51610500  |
| H | 3.87279800  | 1.86856400  | 1.17758300  |
| C | 2.62266300  | 1.87244500  | 2.96147000  |
| H | 1.74597500  | 2.53461300  | 2.98049900  |
| H | 2.35040900  | 0.98935500  | 3.56497900  |
| C | 3.80429500  | 2.57505900  | 3.60877700  |
| H | 3.60096400  | 2.82182000  | 4.66234500  |
| H | 4.71269600  | 1.94934400  | 3.58632500  |
| H | 4.02320100  | 3.51200100  | 3.07552500  |
| H | -1.94816900 | 2.71129300  | 0.56226600  |
| C | 2.02755200  | 5.09373400  | -0.81240500 |
| C | 2.47922300  | 5.45265500  | 0.64999800  |
| O | 2.03524700  | 4.32678500  | 1.39601900  |
| O | 0.88006100  | 4.27513100  | -0.58603900 |
| C | 3.97856600  | 5.61405800  | 0.83080000  |
| H | 4.37149800  | 6.42071200  | 0.19308800  |
| H | 4.19647100  | 5.87185700  | 1.87784700  |
| H | 4.51125900  | 4.68406800  | 0.59488000  |
| C | 1.75854600  | 6.68215900  | 1.19860300  |
| H | 0.67211300  | 6.59909700  | 1.05338000  |
| H | 1.94737000  | 6.74442000  | 2.28008100  |
| H | 2.10690400  | 7.61327300  | 0.72790900  |
| C | 3.07502200  | 4.27099200  | -1.54664700 |
| H | 2.64623000  | 3.89837300  | -2.48660100 |
| H | 3.96903800  | 4.86513200  | -1.78500900 |
| H | 3.36460600  | 3.40439900  | -0.93901200 |
| C | 1.61281700  | 6.28274400  | -1.66141700 |
| H | 2.44684600  | 6.99023400  | -1.78597100 |
| H | 1.31081300  | 5.93210500  | -2.65948000 |
| H | 0.76105600  | 6.81509700  | -1.21900900 |
| B | 0.96150800  | 3.76490700  | 0.70265200  |
| C | -1.45888000 | 3.61911100  | 0.95819200  |
| H | -1.44215200 | 4.35324000  | 0.13409900  |
| O | -0.15106900 | 3.31641400  | 1.37237600  |
| C | -2.25429700 | 4.15440100  | 2.13526000  |
| H | -3.29391500 | 4.30578300  | 1.80385600  |
| H | -2.28639700 | 3.37461700  | 2.91583200  |
| C | -1.68073000 | 5.43682500  | 2.71282700  |
| H | -2.25280300 | 5.78142000  | 3.58779100  |
| H | -0.63615400 | 5.28784100  | 3.02442100  |
| H | -1.69297700 | 6.24808500  | 1.96604400  |

Cartesian coordinates of the optimized geometry of TS-10 at PBE0-D3BJ/def2-SVP level of theory:

|    |             |             |             |
|----|-------------|-------------|-------------|
| Ga | 1.91536800  | -0.62521300 | 0.57589800  |
| Cl | 1.20051600  | -0.81825000 | 2.67964600  |
| Si | -2.16238700 | 0.55306000  | -0.33873100 |
| O  | -0.66057000 | -0.16632800 | -0.32409400 |
| N  | 2.61043400  | -2.42558500 | 0.20444800  |
| N  | 3.68870200  | 0.18934100  | 0.87909000  |
| N  | -2.98847000 | 0.13002000  | 1.24288100  |
| N  | -3.26624100 | -0.89419700 | -0.62744700 |
| C  | 3.68169400  | -2.83613000 | 0.88635100  |
| C  | 4.59564900  | -1.96232200 | 1.48952600  |
| H  | 5.42815500  | -2.43401700 | 2.01029100  |
| C  | 4.66341400  | -0.56021500 | 1.38343900  |
| C  | 3.92573500  | -4.30969500 | 1.04792000  |
| H  | 3.28044500  | -4.67918100 | 1.86172900  |
| H  | 4.96844200  | -4.51755800 | 1.31629000  |
| H  | 3.65676600  | -4.87554400 | 0.14692500  |
| C  | 5.91999200  | 0.08680900  | 1.89458200  |
| H  | 6.11563400  | 1.05111900  | 1.40926100  |
| H  | 6.78251100  | -0.57708300 | 1.75605200  |
| H  | 5.81366900  | 0.27669300  | 2.97413400  |
| C  | 1.89212700  | -3.32937000 | -0.63623700 |
| C  | 0.77733800  | -4.03626800 | -0.14502100 |
| C  | 0.07320700  | -4.86062200 | -1.02992600 |
| H  | -0.79607700 | -5.41290300 | -0.66451400 |
| C  | 0.46041400  | -4.99281300 | -2.35666800 |
| H  | -0.10478600 | -5.63976400 | -3.03170100 |
| C  | 1.57214400  | -4.29848400 | -2.82430200 |
| H  | 1.87073300  | -4.40717400 | -3.86862700 |
| C  | 2.30421600  | -3.45730400 | -1.98385800 |
| C  | 0.32844400  | -3.93426300 | 1.29847100  |
| H  | 1.05760300  | -3.30998100 | 1.83336900  |
| C  | 0.29301500  | -5.30125000 | 1.98113700  |
| H  | -0.47484300 | -5.95723700 | 1.54064400  |
| H  | 0.05446000  | -5.18709600 | 3.04998600  |
| H  | 1.25800200  | -5.82478300 | 1.90126900  |
| C  | -1.02143600 | -3.22726500 | 1.41134700  |
| H  | -1.01039000 | -2.25223900 | 0.90388600  |
| H  | -1.27222900 | -3.05303500 | 2.46908100  |
| H  | -1.82106300 | -3.83805900 | 0.96237100  |
| C  | 3.51700700  | -2.70936800 | -2.50952600 |
| H  | 3.62449200  | -1.80800900 | -1.88622300 |
| C  | 4.80379300  | -3.52135300 | -2.34397400 |
| H  | 4.73466100  | -4.47738100 | -2.88738200 |
| H  | 5.02018100  | -3.74549000 | -1.29150500 |
| H  | 5.66413100  | -2.96360400 | -2.74641200 |
| C  | 3.36756800  | -2.26196100 | -3.96122800 |
| H  | 2.42298700  | -1.72615700 | -4.13222100 |
| H  | 3.40414700  | -3.11396500 | -4.65798500 |
| H  | 4.19617800  | -1.59104300 | -4.23564900 |
| C  | 3.84063300  | 1.59971500  | 0.71745800  |
| C  | 3.67271600  | 2.47623100  | 1.81020600  |
| C  | 3.81239700  | 3.84944700  | 1.57897500  |
| H  | 3.68581000  | 4.54222500  | 2.41444300  |
| C  | 4.09847400  | 4.34815800  | 0.31559100  |
| H  | 4.19954100  | 5.42483700  | 0.15981700  |
| C  | 4.24943000  | 3.47179300  | -0.75425300 |
| H  | 4.46897300  | 3.86845200  | -1.74700200 |
| C  | 4.12428700  | 2.09266100  | -0.57666700 |
| C  | 3.34888400  | 1.99624700  | 3.21253200  |
| H  | 3.33908600  | 0.89671500  | 3.20292700  |
| C  | 4.39322600  | 2.46339600  | 4.22808600  |
| H  | 4.36677700  | 3.55672800  | 4.35985200  |
| H  | 5.41649000  | 2.19571300  | 3.92586500  |
| H  | 4.19756400  | 2.01087900  | 5.21248300  |
| C  | 1.95110200  | 2.44048700  | 3.64184100  |
| H  | 1.87642600  | 3.53891500  | 3.68678000  |
| H  | 1.71433300  | 2.04138200  | 4.63991800  |

|   |             |             |             |
|---|-------------|-------------|-------------|
| H | 1.18528600  | 2.06795400  | 2.95032400  |
| C | 4.33873300  | 1.13869700  | -1.73456500 |
| H | 3.72279600  | 0.25090400  | -1.52551700 |
| C | 5.78952900  | 0.65846400  | -1.80008300 |
| H | 6.47495000  | 1.50647000  | -1.95734500 |
| H | 5.92553200  | -0.04849100 | -2.63396100 |
| H | 6.09280400  | 0.14534500  | -0.87690800 |
| C | 3.89148100  | 1.70351900  | -3.07786000 |
| H | 2.87025800  | 2.10741400  | -3.02870400 |
| H | 3.90469300  | 0.91424800  | -3.84434900 |
| H | 4.55885100  | 2.50622200  | -3.42885900 |
| C | -3.75162800 | -0.75989000 | 0.60491500  |
| C | -4.96602800 | -1.41284100 | 1.14159200  |
| C | -6.18760000 | -0.74049000 | 1.02194500  |
| H | -6.19648800 | 0.22251200  | 0.50275600  |
| C | -7.34165400 | -1.32803500 | 1.53340800  |
| H | -8.29809800 | -0.80829800 | 1.44063400  |
| C | -7.28160100 | -2.57563000 | 2.15536900  |
| H | -8.19079000 | -3.03148900 | 2.55473200  |
| C | -6.06240500 | -3.24298200 | 2.26628900  |
| H | -6.01293900 | -4.21919400 | 2.75392100  |
| C | -4.90094400 | -2.66326600 | 1.76034800  |
| H | -3.93932500 | -3.17052600 | 1.85973500  |
| C | -3.12659500 | 0.78238400  | 2.54937400  |
| C | -4.18137500 | 1.88899100  | 2.47847200  |
| H | -3.89992500 | 2.63410700  | 1.72155000  |
| H | -4.25582500 | 2.39404400  | 3.45411300  |
| H | -5.16934100 | 1.48370000  | 2.22191900  |
| C | -3.47135200 | -0.23132900 | 3.64024200  |
| H | -4.49183600 | -0.62400900 | 3.54243700  |
| H | -3.39377800 | 0.25967500  | 4.62153600  |
| H | -2.76293100 | -1.07338400 | 3.62339500  |
| C | -1.76043300 | 1.39490200  | 2.85153000  |
| H | -1.50034500 | 2.13068000  | 2.07722100  |
| H | -0.98177400 | 0.62074900  | 2.89228400  |
| H | -1.78804500 | 1.92017700  | 3.81780300  |
| C | -3.72429500 | -1.69889100 | -1.76471900 |
| C | -5.21200300 | -1.48905700 | -2.05667600 |
| H | -5.43726400 | -0.41356600 | -2.01954500 |
| H | -5.84659400 | -2.00682900 | -1.32465500 |
| H | -5.45175200 | -1.89363900 | -3.05181900 |
| C | -2.89972500 | -1.22770100 | -2.95853000 |
| H | -3.18076400 | -1.78610800 | -3.86264000 |
| H | -1.82843000 | -1.38856800 | -2.77350600 |
| H | -3.07628100 | -0.15838600 | -3.14853100 |
| C | -3.42323300 | -3.17635000 | -1.50693300 |
| H | -3.72305100 | -3.77610600 | -2.37997700 |
| H | -3.98215000 | -3.54889800 | -0.63647200 |
| H | -2.34883700 | -3.32901100 | -1.33190000 |
| C | 0.64761500  | 0.18793900  | -0.73768000 |
| H | 0.77125200  | 1.28543700  | -0.71443600 |
| C | 0.90851700  | -0.30344400 | -2.15802800 |
| H | 0.59339800  | -1.35857200 | -2.21005300 |
| H | 1.99523600  | -0.31318100 | -2.33092100 |
| C | 0.25355400  | 0.50000500  | -3.27001400 |
| H | -0.82962000 | 0.60139100  | -3.12774300 |
| H | 0.64807900  | 1.52396600  | -3.31159100 |
| H | 0.42061000  | 0.01977600  | -4.24755700 |
| C | -0.65266600 | 4.23625600  | -1.57804000 |
| C | -0.91528900 | 4.39092600  | -0.03776600 |
| B | -2.04689700 | 2.56655900  | -0.90108800 |
| O | -1.02124500 | 2.87962400  | -1.81542700 |
| O | -1.96619700 | 3.45554400  | 0.20127900  |
| H | -3.28113000 | 2.76143000  | -1.46826200 |
| C | -4.60326200 | 2.59164800  | -1.20942600 |
| O | -4.79129300 | 1.38813700  | -0.86144600 |
| H | -4.64994800 | 3.39023700  | -0.42525800 |
| C | -5.12472700 | 3.09231800  | -2.55360700 |
| H | -6.22557300 | 3.14302700  | -2.46248200 |

|   |             |            |             |
|---|-------------|------------|-------------|
| H | -4.77766000 | 4.12824000 | -2.70941200 |
| C | -4.73491500 | 2.21168300 | -3.72545500 |
| H | -5.10868100 | 1.18732900 | -3.58732500 |
| H | -5.13641700 | 2.59585800 | -4.67536300 |
| H | -3.63740600 | 2.15966100 | -3.81948500 |
| C | -1.38844300 | 5.77270700 | 0.38360400  |
| H | -0.63642800 | 6.53963500 | 0.14156200  |
| H | -2.33544200 | 6.03888100 | -0.10265900 |
| H | -1.55317600 | 5.78722500 | 1.47094200  |
| C | -1.56160600 | 5.12425700 | -2.42488700 |
| H | -1.28353000 | 6.18586400 | -2.35584400 |
| H | -1.47935200 | 4.80899300 | -3.47526700 |
| H | -2.61339900 | 5.01815200 | -2.12326800 |
| C | 0.79452000  | 4.42963100 | -1.99442300 |
| H | 0.88839600  | 4.28888000 | -3.08166600 |
| H | 1.14203900  | 5.44558500 | -1.75171500 |
| H | 1.45892300  | 3.71170700 | -1.49710300 |
| C | 0.28347600  | 3.98378100 | 0.80888800  |
| H | 1.12061900  | 4.68875600 | 0.71178300  |
| H | -0.01847700 | 3.95467200 | 1.86456700  |
| H | 0.64977300  | 2.98356200 | 0.53774300  |

Cartesian coordinates of the optimized geometry of TS-11 at PBE0-D3BJ/def2-SVP level of theory:

|    |             |             |             |
|----|-------------|-------------|-------------|
| Ga | -1.86207500 | -0.60775200 | -0.60597000 |
| Cl | -1.07772000 | -0.86534000 | -2.68573800 |
| Si | 2.06416600  | 0.54993300  | 0.36871000  |
| O  | 0.67674700  | -0.41037600 | 0.58644700  |
| N  | -2.68517400 | -2.36323600 | -0.26415000 |
| N  | -3.57498600 | 0.31507300  | -0.94624000 |
| N  | 3.04922500  | -0.00860900 | -1.12106100 |
| N  | 3.21170800  | -0.92894900 | 0.81522700  |
| C  | -3.75225400 | -2.70166600 | -0.98623500 |
| C  | -4.55757100 | -1.77067800 | -1.66239200 |
| H  | -5.37525700 | -2.19069000 | -2.24629100 |
| C  | -4.53824700 | -0.36876700 | -1.56240700 |
| C  | -4.12079200 | -4.15200400 | -1.12127700 |
| H  | -3.49477600 | -4.60122800 | -1.90916800 |
| H  | -5.17186200 | -4.27145100 | -1.41030000 |
| H  | -3.92542100 | -4.71431300 | -0.19923800 |
| C  | -5.66971400 | 0.37755100  | -2.21086600 |
| H  | -6.01419400 | 1.21588400  | -1.59120300 |
| H  | -6.51265200 | -0.28916800 | -2.42732700 |
| H  | -5.31698700 | 0.81098100  | -3.16005400 |
| C  | -2.03173900 | -3.31747200 | 0.57431800  |
| C  | -1.00583700 | -4.13619900 | 0.06236500  |
| C  | -0.36818900 | -5.02482400 | 0.93462500  |
| H  | 0.43309000  | -5.66206900 | 0.55244300  |
| C  | -0.72870100 | -5.10701700 | 2.27242600  |
| H  | -0.21480400 | -5.80436700 | 2.93825300  |
| C  | -1.74546800 | -4.29453000 | 2.76372300  |
| H  | -2.02307500 | -4.36283300 | 3.81692000  |
| C  | -2.41325400 | -3.39052500 | 1.93439100  |
| C  | -0.56554100 | -4.07141000 | -1.38585100 |
| H  | -1.24308900 | -3.38898700 | -1.91727800 |
| C  | -0.63450000 | -5.43499100 | -2.07220700 |
| H  | 0.08829600  | -6.14626700 | -1.64140500 |
| H  | -0.39860000 | -5.33489500 | -3.14303300 |
| H  | -1.63329200 | -5.88907300 | -1.98437400 |
| C  | 0.83549800  | -3.47250100 | -1.49873300 |
| H  | 0.89849600  | -2.49655900 | -0.99513900 |
| H  | 1.10501200  | -3.32450200 | -2.55585100 |
| H  | 1.57676800  | -4.14639800 | -1.03976400 |
| C  | -3.53957200 | -2.53097900 | 2.47870800  |
| H  | -3.53427400 | -1.60114900 | 1.89054300  |
| C  | -4.90672000 | -3.18560500 | 2.26730700  |
| H  | -4.95185300 | -4.16689500 | 2.76637000  |

|   |             |             |             |
|---|-------------|-------------|-------------|
| H | -5.13493700 | -3.33460600 | 1.20387700  |
| H | -5.70403000 | -2.55350500 | 2.68917700  |
| C | -3.36083100 | -2.15516200 | 3.94612100  |
| H | -2.36996800 | -1.72049200 | 4.14082100  |
| H | -3.48958700 | -3.02395100 | 4.61068800  |
| H | -4.12000800 | -1.41480700 | 4.23982400  |
| C | -3.72536900 | 1.71881000  | -0.71811200 |
| C | -3.34820100 | 2.65418800  | -1.70362700 |
| C | -3.53157700 | 4.01411500  | -1.43267100 |
| H | -3.24011400 | 4.74898800  | -2.18685400 |
| C | -4.06625200 | 4.44688000  | -0.22738000 |
| H | -4.19892900 | 5.51430100  | -0.03627200 |
| C | -4.41851900 | 3.51498800  | 0.74232300  |
| H | -4.82939400 | 3.85925400  | 1.69323400  |
| C | -4.25453500 | 2.14541000  | 0.52142500  |
| C | -2.73059200 | 2.24224500  | -3.02434100 |
| H | -2.77539800 | 1.14609500  | -3.09536100 |
| C | -3.47541500 | 2.82474700  | -4.22490200 |
| H | -3.38680300 | 3.92184800  | -4.26891600 |
| H | -4.54912600 | 2.58306700  | -4.20123700 |
| H | -3.05759500 | 2.42496300  | -5.16166200 |
| C | -1.25167500 | 2.62397500  | -3.06451600 |
| H | -1.12071100 | 3.71769400  | -3.02780300 |
| H | -0.77952000 | 2.25185400  | -3.98587700 |
| H | -0.70193400 | 2.18774900  | -2.21972000 |
| C | -4.67381900 | 1.14651600  | 1.58236300  |
| H | -4.08032100 | 0.23681600  | 1.40614200  |
| C | -6.14366900 | 0.74740900  | 1.43940700  |
| H | -6.79941000 | 1.62840200  | 1.52849500  |
| H | -6.42736800 | 0.03209500  | 2.22763300  |
| H | -6.34717000 | 0.26956200  | 0.47125700  |
| C | -4.38305900 | 1.62933700  | 3.00064400  |
| H | -3.34662000 | 1.98200600  | 3.10722500  |
| H | -4.53841400 | 0.81113300  | 3.71964100  |
| H | -5.05272300 | 2.45096900  | 3.29906500  |
| C | 3.69905400  | -0.93807600 | -0.41157700 |
| C | 4.80642000  | -1.79457200 | -0.90928900 |
| C | 6.12718700  | -1.35009900 | -0.78995400 |
| H | 6.33203200  | -0.38610700 | -0.31981200 |
| C | 7.17503600  | -2.13603900 | -1.26270800 |
| H | 8.20366700  | -1.78138400 | -1.16671900 |
| C | 6.91140300  | -3.37079600 | -1.85411600 |
| H | 7.73387100  | -3.98688000 | -2.22479200 |
| C | 5.59561900  | -3.81610700 | -1.97272100 |
| H | 5.38286000  | -4.78055200 | -2.43936900 |
| C | 4.54481400  | -3.03139400 | -1.50469500 |
| H | 3.51372300  | -3.36802800 | -1.61601400 |
| C | 3.31754000  | 0.55663600  | -2.44943100 |
| C | 3.65447400  | -0.52622900 | -3.47619800 |
| H | 4.63880900  | -0.98275700 | -3.31021000 |
| H | 3.66288500  | -0.07350100 | -4.47879500 |
| H | 2.88972100  | -1.31747900 | -3.46781200 |
| C | 2.03179200  | 1.25559900  | -2.88778000 |
| H | 1.19731200  | 0.54106100  | -2.92826400 |
| H | 2.16882100  | 1.69144300  | -3.88894600 |
| H | 1.78036100  | 2.07073000  | -2.19570300 |
| C | 4.45274100  | 1.58018500  | -2.34971000 |
| H | 5.38796800  | 1.10328700  | -2.01887900 |
| H | 4.17635800  | 2.37553000  | -1.64235700 |
| H | 4.63861200  | 2.04086000  | -3.33242500 |
| C | 3.39753400  | -1.84969700 | 1.93772300  |
| C | 4.87226400  | -1.97093000 | 2.33081000  |
| H | 5.30620400  | -0.97998500 | 2.53181800  |
| H | 5.46862500  | -2.45984100 | 1.54891000  |
| H | 4.96182200  | -2.57428000 | 3.24679300  |
| C | 2.60692300  | -1.26873800 | 3.10914900  |
| H | 2.75039000  | -1.88591100 | 4.00771200  |
| H | 1.53733200  | -1.24649300 | 2.86374600  |
| H | 2.93166500  | -0.24246400 | 3.33082500  |

|   |             |             |             |
|---|-------------|-------------|-------------|
| C | 2.81931500  | -3.22621700 | 1.60221800  |
| H | 2.86603200  | -3.88251900 | 2.48487000  |
| H | 3.38143200  | -3.71176400 | 0.79185200  |
| H | 1.76800400  | -3.12901700 | 1.29952500  |
| C | -0.60826400 | 0.17752000  | 0.71429700  |
| H | -0.54868900 | 1.25812500  | 0.47157100  |
| C | -1.10522100 | 0.03410400  | 2.14754700  |
| H | -0.98783300 | -1.02461300 | 2.43416900  |
| H | -2.18707800 | 0.23500900  | 2.17187500  |
| C | -0.42120800 | 0.94046900  | 3.15936400  |
| H | 0.66710300  | 0.78966800  | 3.17633400  |
| H | -0.57570100 | 2.00030900  | 2.91246200  |
| H | -0.80053400 | 0.75342800  | 4.17691300  |
| C | 0.84216400  | 4.52883500  | 1.00964900  |
| C | 1.96591000  | 4.74828900  | -0.06352600 |
| B | 1.87663900  | 2.52703000  | 0.55936100  |
| O | 1.16171200  | 3.24891500  | 1.53755300  |
| O | 2.25866900  | 3.41374200  | -0.46965200 |
| H | 4.87833800  | 2.85529400  | 1.05231600  |
| C | 4.56728100  | 1.94208600  | 1.59117800  |
| O | 3.21054200  | 1.69573700  | 1.30547200  |
| H | 5.17316600  | 1.10753700  | 1.19247200  |
| C | 4.81152400  | 2.09020100  | 3.08339600  |
| H | 4.55953300  | 1.13385700  | 3.57165600  |
| H | 5.89374300  | 2.23968400  | 3.24585700  |
| C | 4.01366800  | 3.21606500  | 3.72060100  |
| H | 2.94790800  | 3.13015400  | 3.45807500  |
| H | 4.10766400  | 3.20546400  | 4.81693900  |
| H | 4.36480300  | 4.20000800  | 3.37012500  |
| C | 0.83808000  | 5.54476700  | 2.13915000  |
| H | 1.78121500  | 5.52612200  | 2.70016600  |
| H | 0.67249600  | 6.56370500  | 1.75607200  |
| H | 0.02469900  | 5.30849700  | 2.84117700  |
| C | -0.54882000 | 4.43992600  | 0.38836200  |
| H | -0.56417600 | 3.72590000  | -0.44609100 |
| H | -1.25973500 | 4.07899100  | 1.14560700  |
| H | -0.90889100 | 5.41130400  | 0.01897600  |
| C | 1.53230900  | 5.54071400  | -1.28523200 |
| H | 1.20158700  | 6.55286400  | -1.00541200 |
| H | 2.37850300  | 5.63811500  | -1.98164900 |
| H | 0.71582500  | 5.03584900  | -1.81718800 |
| C | 3.23290100  | 5.36044100  | 0.52443300  |
| H | 3.53905300  | 4.82756300  | 1.43362500  |
| H | 4.04335100  | 5.27297400  | -0.21443300 |
| H | 3.10301800  | 6.42486200  | 0.77044000  |

Cartesian coordinates of the optimized geometry of TS-12 at PBE0-D3BJ/def2-SVP level of theory:

|    |             |             |             |
|----|-------------|-------------|-------------|
| Ga | -2.08693900 | -0.47667500 | -0.53839800 |
| Cl | -1.44583200 | -0.76610200 | -2.66244400 |
| Si | 2.03483500  | 0.29732500  | 0.26788300  |
| O  | 0.52639400  | -0.47453900 | 0.33837500  |
| N  | -3.00448400 | -2.16112100 | -0.14105700 |
| N  | -3.73369600 | 0.58068200  | -0.78718500 |
| N  | 2.79715500  | -0.41123200 | -1.32724200 |
| N  | 3.14470900  | -1.19437500 | 0.64134400  |
| C  | -4.14274500 | -2.41904800 | -0.78473900 |
| C  | -4.93268600 | -1.42701600 | -1.38626900 |
| H  | -5.82844100 | -1.78171400 | -1.89472600 |
| C  | -4.80113700 | -0.02803600 | -1.29574900 |
| C  | -4.60703200 | -3.84238100 | -0.90736300 |
| H  | -4.05850300 | -4.31626800 | -1.73777800 |
| H  | -5.67960000 | -3.89808700 | -1.12889300 |
| H  | -4.38532400 | -4.42652100 | -0.00494200 |
| C  | -5.93938100 | 0.79251400  | -1.83338100 |
| H  | -6.03410600 | 1.75469400  | -1.31423000 |
| H  | -6.88661600 | 0.24316300  | -1.76820000 |

|   |             |             |             |
|---|-------------|-------------|-------------|
| H | -5.74863800 | 1.01301400  | -2.89576200 |
| C | -2.37117300 | -3.14383000 | 0.67973500  |
| C | -1.39593400 | -4.00840300 | 0.14479600  |
| C | -0.76714400 | -4.91291500 | 1.00750800  |
| H | -0.00485500 | -5.58597700 | 0.60737800  |
| C | -1.08882400 | -4.96798700 | 2.35656900  |
| H | -0.58303400 | -5.67954500 | 3.01352800  |
| C | -2.05497000 | -4.10903800 | 2.87084300  |
| H | -2.29984300 | -4.15382500 | 3.93348900  |
| C | -2.70858800 | -3.18463800 | 2.05318100  |
| C | -1.00440100 | -3.98455900 | -1.31865500 |
| H | -1.65715600 | -3.26440200 | -1.83156600 |
| C | -1.19719400 | -5.34781500 | -1.98237300 |
| H | -0.51284300 | -6.10455700 | -1.56635200 |
| H | -0.99376400 | -5.27837400 | -3.06230800 |
| H | -2.22284000 | -5.72591000 | -1.85247600 |
| C | 0.42831900  | -3.48172600 | -1.49553000 |
| H | 0.57143800  | -2.49834200 | -1.02438200 |
| H | 0.66673400  | -3.38193800 | -2.56579400 |
| H | 1.14642600  | -4.18752300 | -1.04652000 |
| C | -3.76683700 | -2.26053600 | 2.62811300  |
| H | -3.75470500 | -1.34993800 | 2.00968100  |
| C | -5.17041900 | -2.85974700 | 2.51322200  |
| H | -5.23044500 | -3.81886900 | 3.05227900  |
| H | -5.46106400 | -3.03890300 | 1.47001700  |
| H | -5.91630600 | -2.17734700 | 2.95053300  |
| C | -3.49187400 | -1.84982800 | 4.07147300  |
| H | -2.47391600 | -1.45514800 | 4.19938700  |
| H | -3.62112500 | -2.69233300 | 4.76885100  |
| H | -4.20266200 | -1.06905600 | 4.38206000  |
| C | -3.69658900 | 1.99595400  | -0.59045700 |
| C | -3.35452600 | 2.86621300  | -1.64669600 |
| C | -3.29910100 | 4.23927600  | -1.38205400 |
| H | -3.03516900 | 4.92392300  | -2.19181200 |
| C | -3.55952800 | 4.74584700  | -0.11688100 |
| H | -3.50243700 | 5.82105700  | 0.06808300  |
| C | -3.88594900 | 3.87588000  | 0.91801100  |
| H | -4.08646400 | 4.27703800  | 1.91286200  |
| C | -3.96260400 | 2.49768800  | 0.70493200  |
| C | -3.03044700 | 2.37776700  | -3.04472700 |
| H | -3.16846000 | 1.28726100  | -3.06629600 |
| C | -3.94931500 | 3.00053800  | -4.09633600 |
| H | -3.78534000 | 4.08620300  | -4.18596700 |
| H | -5.01266200 | 2.84918000  | -3.85776700 |
| H | -3.75450000 | 2.55665600  | -5.08488700 |
| C | -1.56386300 | 2.64006400  | -3.38474500 |
| H | -1.34624900 | 3.71999800  | -3.41813400 |
| H | -1.31286900 | 2.20940900  | -4.36589000 |
| H | -0.89851100 | 2.17910600  | -2.64405100 |
| C | -4.36426600 | 1.56703400  | 1.83178000  |
| H | -3.87835900 | 0.60108000  | 1.62625800  |
| C | -5.87181900 | 1.30720300  | 1.83559800  |
| H | -6.42984600 | 2.24650400  | 1.97744100  |
| H | -6.14313900 | 0.62310600  | 2.65535200  |
| H | -6.21216500 | 0.85002000  | 0.89642800  |
| C | -3.89610900 | 2.04217100  | 3.20319400  |
| H | -2.82600700 | 2.29508700  | 3.20448600  |
| H | -4.05691100 | 1.25317900  | 3.95264500  |
| H | -4.45576600 | 2.92760800  | 3.54313700  |
| C | 3.53598900  | -1.26932900 | -0.62801200 |
| C | 4.64777200  | -2.10576300 | -1.14875200 |
| C | 5.97280800  | -1.67749800 | -1.02014400 |
| H | 6.18614700  | -0.72345400 | -0.53286400 |
| C | 7.01142100  | -2.46881000 | -1.50326100 |
| H | 8.04436600  | -2.12797000 | -1.40289500 |
| C | 6.73383800  | -3.69437800 | -2.10854000 |
| H | 7.55016800  | -4.31581300 | -2.48394900 |
| C | 5.41391700  | -4.12494600 | -2.23450600 |
| H | 5.19247300  | -5.08343700 | -2.70932500 |



|   |             |             |             |
|---|-------------|-------------|-------------|
| C | 4.37116000  | -3.33198000 | -1.76030400 |
| H | 3.33418600  | -3.65649300 | -1.86788800 |
| C | 3.01550000  | 0.18692000  | -2.64633000 |
| C | 3.05032300  | -0.88325300 | -3.73743600 |
| H | 3.93686100  | -1.52684900 | -3.65780700 |
| H | 3.07344300  | -0.40068400 | -4.72612000 |
| H | 2.14815600  | -1.51051400 | -3.68187400 |
| C | 1.81373700  | 1.09954300  | -2.87848200 |
| H | 0.87641800  | 0.52569700  | -2.85256000 |
| H | 1.89328900  | 1.60522800  | -3.85196000 |
| H | 1.78323900  | 1.87366400  | -2.09653400 |
| C | 4.29540500  | 1.02821200  | -2.65111200 |
| H | 5.18784800  | 0.40088400  | -2.51161700 |
| H | 4.25224400  | 1.78247900  | -1.84980200 |
| H | 4.40228800  | 1.55131200  | -3.61419600 |
| C | 3.37480600  | -2.07190300 | 1.78763800  |
| C | 4.86315900  | -2.30138600 | 2.06241700  |
| H | 5.39479200  | -1.34429400 | 2.16812800  |
| H | 5.34663000  | -2.88381500 | 1.26712200  |
| H | 4.97901100  | -2.86015700 | 3.00336200  |
| C | 2.74320600  | -1.37026700 | 2.98891600  |
| H | 2.92525500  | -1.94588300 | 3.90786000  |
| H | 1.65705600  | -1.28373600 | 2.84819900  |
| H | 3.15544300  | -0.35747500 | 3.11580600  |
| C | 2.66601900  | -3.40891200 | 1.55548800  |
| H | 2.75156000  | -4.04918000 | 2.44711800  |
| H | 3.11124900  | -3.94915200 | 0.70646000  |
| H | 1.60006900  | -3.24307100 | 1.34575800  |
| C | -0.68139200 | 0.18369300  | 0.69152000  |
| H | -0.59197200 | 1.26796600  | 0.49812800  |
| C | -0.98342400 | -0.00519600 | 2.17339300  |
| H | -0.81949000 | -1.06959800 | 2.41327400  |
| H | -2.05285000 | 0.17923000  | 2.35520000  |
| C | -0.17106700 | 0.89377400  | 3.09353700  |
| H | 0.91052300  | 0.79942300  | 2.92053100  |
| H | -0.40559100 | 1.95515300  | 2.92380000  |
| H | -0.36331200 | 0.66187800  | 4.15330200  |
| C | 1.25041500  | 4.29952700  | 0.67335700  |
| C | 2.58705000  | 4.53720100  | -0.11983400 |
| B | 2.77761500  | 2.68070800  | 1.17520500  |
| O | 1.63478100  | 3.32564300  | 1.63885100  |
| O | 3.23516800  | 3.26924800  | -0.01669500 |
| H | 5.34943200  | 2.46217700  | 0.98546800  |
| C | 4.91884900  | 1.72720900  | 1.69011900  |
| O | 3.64789200  | 2.14221300  | 2.10648500  |
| H | 4.83859800  | 0.76639600  | 1.14311600  |
| C | 5.82262100  | 1.56164200  | 2.89555200  |
| H | 5.39216200  | 0.78990600  | 3.55681000  |
| H | 6.79307100  | 1.16669600  | 2.54757000  |
| C | 6.01864600  | 2.85325000  | 3.67176100  |
| H | 5.04803600  | 3.24272900  | 4.01205800  |
| H | 6.65959800  | 2.70551100  | 4.55415900  |
| H | 6.48563700  | 3.62782000  | 3.04162100  |
| C | 0.72728000  | 5.52432900  | 1.40579400  |
| H | 1.44248300  | 5.87668100  | 2.15971900  |
| H | 0.51454900  | 6.34452500  | 0.70280100  |
| H | -0.20966700 | 5.26764500  | 1.92186900  |
| C | 0.14280800  | 3.72811800  | -0.20258200 |
| H | 0.48557500  | 2.83591600  | -0.74300800 |
| H | -0.71052600 | 3.44113500  | 0.42846800  |
| H | -0.22070900 | 4.46119300  | -0.93578700 |
| C | 2.40554900  | 4.89412500  | -1.58363400 |
| H | 1.84991500  | 5.83830200  | -1.69109500 |
| H | 3.39036300  | 5.02248100  | -2.05696500 |
| H | 1.86936400  | 4.10825000  | -2.13000300 |
| C | 3.49195300  | 5.56405300  | 0.55829900  |
| H | 3.62075100  | 5.32766500  | 1.62477200  |
| H | 4.48225900  | 5.52724300  | 0.08121400  |
| H | 3.10118100  | 6.58835800  | 0.46860100  |

Cartesian coordinates of the optimized geometry of vdW-1 at PBE0-D3BJ/def2-SVP level of theory:

|    |             |             |             |
|----|-------------|-------------|-------------|
| Ga | 1.00054100  | 0.24244600  | -0.73263500 |
| Cl | 1.07334700  | 0.10082600  | -2.99996800 |
| Si | -0.73991300 | -1.18714200 | 0.25906500  |
| N  | 2.82186200  | -0.52640500 | -0.35775500 |
| N  | 1.62410200  | 2.09924500  | -0.44708800 |
| C  | 3.89964100  | 0.15638200  | -0.69999300 |
| C  | 3.85533100  | 1.49760400  | -1.14250700 |
| H  | 4.78866800  | 1.89545500  | -1.53998900 |
| C  | 2.82478700  | 2.41745000  | -0.95864700 |
| C  | 5.26808500  | -0.46094900 | -0.62145000 |
| H  | 5.64284300  | -0.64554300 | -1.63981300 |
| H  | 5.26552900  | -1.41170000 | -0.07577100 |
| H  | 5.96766000  | 0.23458300  | -0.13754700 |
| C  | 3.08397100  | 3.84248000  | -1.36328800 |
| H  | 4.13917400  | 3.99811000  | -1.61734300 |
| H  | 2.79057900  | 4.55511000  | -0.58104800 |
| H  | 2.47160500  | 4.07589700  | -2.24903300 |
| C  | 2.88399800  | -1.86954500 | 0.11728600  |
| C  | 3.09959400  | -2.93967900 | -0.77718800 |
| C  | 3.05422200  | -4.24343900 | -0.26866200 |
| H  | 3.21553800  | -5.08321300 | -0.94916300 |
| C  | 2.81044600  | -4.48980000 | 1.07448700  |
| H  | 2.77703100  | -5.51617300 | 1.44777800  |
| C  | 2.61427000  | -3.42340000 | 1.94717300  |
| H  | 2.43061700  | -3.62159400 | 3.00394700  |
| C  | 2.64526600  | -2.10456300 | 1.49227500  |
| C  | 3.39403500  | -2.74382300 | -2.25392400 |
| H  | 3.36866100  | -1.66545600 | -2.46839400 |
| C  | 4.77482000  | -3.29004000 | -2.62675200 |
| H  | 4.80549800  | -4.38706700 | -2.53065900 |
| H  | 5.57308800  | -2.88432300 | -1.98999300 |
| H  | 5.01414900  | -3.04553300 | -3.67353500 |
| C  | 2.32584700  | -3.38794200 | -3.13430100 |
| H  | 1.33153200  | -2.99545800 | -2.89717500 |
| H  | 2.30464700  | -4.48232400 | -3.00770600 |
| H  | 2.52520500  | -3.17475300 | -4.19568500 |
| C  | 2.48028500  | -0.94606900 | 2.45721700  |
| H  | 1.84269000  | -0.19927300 | 1.95080500  |
| C  | 3.83038700  | -0.28235100 | 2.74376600  |
| H  | 4.53256000  | -1.01505200 | 3.17196300  |
| H  | 3.71239900  | 0.53498500  | 3.47140600  |
| H  | 4.28898800  | 0.14194700  | 1.84133800  |
| C  | 1.79887800  | -1.31487700 | 3.76940400  |
| H  | 2.44614100  | -1.95311700 | 4.39251500  |
| H  | 0.83871000  | -1.83226000 | 3.62824200  |
| H  | 1.59990900  | -0.40107000 | 4.34951000  |
| C  | 0.80356200  | 3.14677600  | 0.06410300  |
| C  | -0.15685000 | 3.76897300  | -0.75725700 |
| C  | -0.92303200 | 4.80976200  | -0.22196200 |
| H  | -1.67235700 | 5.29886100  | -0.84886600 |
| C  | -0.74539900 | 5.23221000  | 1.08875600  |
| H  | -1.35187300 | 6.04736300  | 1.49047300  |
| C  | 0.20331400  | 4.60783300  | 1.89210400  |
| H  | 0.33214800  | 4.94102800  | 2.92336400  |
| C  | 0.99179300  | 3.56202400  | 1.40486500  |
| C  | -0.38854600 | 3.31784700  | -2.18366700 |
| H  | 0.44612000  | 2.66360200  | -2.47417400 |
| C  | -0.43385300 | 4.47761800  | -3.17527400 |
| H  | -1.31231700 | 5.12377100  | -3.01883300 |
| H  | -0.49034000 | 4.09274500  | -4.20500500 |
| H  | 0.46228100  | 5.11242900  | -3.09822600 |
| C  | -1.65695600 | 2.47215500  | -2.26395400 |
| H  | -1.59335600 | 1.59585500  | -1.60035100 |
| H  | -1.81805600 | 2.10270500  | -3.28746800 |

|   |             |             |             |
|---|-------------|-------------|-------------|
| H | -2.53548200 | 3.06733400  | -1.96440200 |
| C | 2.04121400  | 2.91321600  | 2.29263800  |
| H | 2.12966800  | 1.86792800  | 1.95744900  |
| C | 3.42087600  | 3.55783300  | 2.12749400  |
| H | 4.13659800  | 3.10525400  | 2.83149300  |
| H | 3.37377100  | 4.63785500  | 2.34114500  |
| H | 3.82977000  | 3.42314300  | 1.11877100  |
| C | 1.66514100  | 2.91107100  | 3.77209000  |
| H | 2.36593600  | 2.27796500  | 4.33710800  |
| H | 0.65079600  | 2.52791600  | 3.94162100  |
| H | 1.72603700  | 3.92042400  | 4.20885200  |
| N | -2.13856100 | -0.06151800 | 0.83395600  |
| N | -2.15819600 | -1.15445200 | -0.99877500 |
| C | -2.92568300 | -0.42184600 | -0.18295200 |
| C | -4.37933600 | -0.14852000 | -0.32976400 |
| C | -5.32203900 | -0.96862600 | 0.30279600  |
| H | -4.98214400 | -1.81144600 | 0.90747600  |
| C | -6.68351900 | -0.72129100 | 0.15450600  |
| H | -7.40863800 | -1.37014900 | 0.65085500  |
| C | -7.11932700 | 0.34937300  | -0.62600800 |
| H | -8.18822900 | 0.54321500  | -0.74172700 |
| C | -6.18729600 | 1.17015400  | -1.25724800 |
| H | -6.52137900 | 2.01133700  | -1.86881600 |
| C | -4.82351700 | 0.92271100  | -1.11114300 |
| H | -4.09308400 | 1.56768500  | -1.60041200 |
| C | -2.49157200 | -1.89464100 | -2.21769400 |
| C | -1.27618400 | -2.76349100 | -2.52404100 |
| H | -1.06999500 | -3.46492400 | -1.70048400 |
| H | -0.39812700 | -2.12029600 | -2.67649600 |
| H | -1.43689200 | -3.34367400 | -3.44424600 |
| C | -3.72107600 | -2.78912500 | -2.03613200 |
| H | -3.60846800 | -3.43007600 | -1.14894700 |
| H | -3.83428500 | -3.44022000 | -2.91605900 |
| H | -4.64628700 | -2.20737000 | -1.93128400 |
| C | -2.70582200 | -0.92147500 | -3.37956900 |
| H | -3.56005300 | -0.25603900 | -3.18934200 |
| H | -2.91196500 | -1.47926200 | -4.30595200 |
| H | -1.80201100 | -0.31481100 | -3.53193900 |
| C | -2.40757600 | 0.72653400  | 2.03671300  |
| C | -3.47165200 | 0.07435300  | 2.92397200  |
| H | -3.17840800 | -0.95633600 | 3.17419200  |
| H | -4.45923800 | 0.07605100  | 2.44396000  |
| H | -3.55985700 | 0.63866800  | 3.86499200  |
| C | -2.81503900 | 2.14706200  | 1.64636300  |
| H | -2.93148900 | 2.76931700  | 2.54636700  |
| H | -3.77216800 | 2.15449800  | 1.10499100  |
| H | -2.04645400 | 2.60899100  | 1.01065700  |
| C | -1.09111100 | 0.75776200  | 2.80457600  |
| H | -0.79563900 | -0.25948400 | 3.10039000  |
| H | -1.19905900 | 1.35904500  | 3.71812500  |
| H | -0.30043600 | 1.20997900  | 2.18753600  |
| O | -1.39665900 | -2.62558100 | 3.45024200  |
| C | -1.25172400 | -3.27272300 | 2.43239000  |
| H | -0.23968400 | -3.61495400 | 2.11389800  |
| C | -2.42478800 | -3.80401300 | 1.64217600  |
| H | -2.06858300 | -4.20525200 | 0.68167700  |
| H | -3.09357200 | -2.95663800 | 1.42037200  |
| C | -3.18288300 | -4.86085800 | 2.44175300  |
| H | -3.52507400 | -4.44207600 | 3.39958200  |
| H | -4.06117800 | -5.22216100 | 1.88611100  |
| H | -2.54635700 | -5.73183900 | 2.66370300  |

Cartesian coordinates of the optimized geometry of vdW-2 at PBE0-D3BJ/def2-SVP level of theory:

|    |             |             |             |
|----|-------------|-------------|-------------|
| Ga | -2.01548800 | -0.45694300 | -0.56114500 |
| Cl | -1.15162900 | -0.75324100 | -2.59952000 |
| Si | 2.05567900  | 0.23364100  | 0.40335800  |

|   |             |             |             |
|---|-------------|-------------|-------------|
| O | 0.54816600  | -0.47117100 | 0.50160100  |
| N | -3.03111900 | -2.10754600 | -0.25694000 |
| N | -3.59407100 | 0.64391300  | -1.00753800 |
| N | 2.89357000  | -0.40884300 | -1.13424300 |
| N | 3.21421700  | -1.15181900 | 0.85194900  |
| C | -4.08664700 | -2.34274300 | -1.04040700 |
| C | -4.78141400 | -1.33462200 | -1.71927700 |
| H | -5.62856800 | -1.66464100 | -2.31958000 |
| C | -4.63219100 | 0.06126200  | -1.59730400 |
| C | -4.55242100 | -3.75777200 | -1.23377900 |
| H | -3.90548200 | -4.23142000 | -1.99047900 |
| H | -5.58708400 | -3.79651600 | -1.59505900 |
| H | -4.45905200 | -4.35322600 | -0.31673200 |
| C | -5.72875600 | 0.90002400  | -2.19126000 |
| H | -5.79683500 | 1.88720800  | -1.71759100 |
| H | -6.69497500 | 0.38602400  | -2.11215300 |
| H | -5.52166900 | 1.05979300  | -3.26089500 |
| C | -2.58244900 | -3.08937000 | 0.67804000  |
| C | -1.53223500 | -3.96837300 | 0.35086900  |
| C | -1.08814400 | -4.86617700 | 1.32826600  |
| H | -0.26921000 | -5.54949100 | 1.08956200  |
| C | -1.67081100 | -4.90850000 | 2.58737100  |
| H | -1.31076900 | -5.61778200 | 3.33637100  |
| C | -2.71529300 | -4.04140200 | 2.89327000  |
| H | -3.16616100 | -4.07680400 | 3.88681700  |
| C | -3.18502000 | -3.11694900 | 1.95848100  |
| C | -0.88162400 | -3.97867100 | -1.01684200 |
| H | -1.39398600 | -3.23203000 | -1.64009800 |
| C | -1.02971000 | -5.33785700 | -1.70092000 |
| H | -0.47966500 | -6.12573000 | -1.16163100 |
| H | -0.62811300 | -5.29580400 | -2.72536700 |
| H | -2.08232500 | -5.65372300 | -1.76032000 |
| C | 0.58502700  | -3.55850200 | -0.93660600 |
| H | 0.69304200  | -2.57699100 | -0.45355600 |
| H | 1.01340900  | -3.48847900 | -1.94822000 |
| H | 1.17633500  | -4.29275600 | -0.36432600 |
| C | -4.31711200 | -2.17162800 | 2.32052300  |
| H | -4.21468300 | -1.29139700 | 1.66715400  |
| C | -5.68879900 | -2.78595900 | 2.03205100  |
| H | -5.83039400 | -3.71312300 | 2.61040400  |
| H | -5.81904400 | -3.02795600 | 0.96934700  |
| H | -6.49073300 | -2.08497600 | 2.31248800  |
| C | -4.25529100 | -1.69050900 | 3.76819300  |
| H | -3.26447500 | -1.28926300 | 4.02587000  |
| H | -4.48794000 | -2.49868000 | 4.47894500  |
| H | -5.00010100 | -0.89726700 | 3.93449300  |
| C | -3.52818200 | 2.06150000  | -0.84046800 |
| C | -3.15093900 | 2.90047400  | -1.90999800 |
| C | -3.07928300 | 4.27796400  | -1.67276000 |
| H | -2.78620500 | 4.94112800  | -2.49018400 |
| C | -3.36204000 | 4.81591900  | -0.42518100 |
| H | -3.29387800 | 5.89414200  | -0.26311300 |
| C | -3.72385000 | 3.97488800  | 0.62187000  |
| H | -3.93726000 | 4.40097200  | 1.60343500  |
| C | -3.81191600 | 2.59402000  | 0.43775300  |
| C | -2.81257900 | 2.37807700  | -3.29324700 |
| H | -2.96830600 | 1.28939800  | -3.29542900 |
| C | -3.70151700 | 2.99920000  | -4.37211100 |
| H | -3.50263700 | 4.07663700  | -4.48565600 |
| H | -4.77204600 | 2.88726800  | -4.14589000 |
| H | -3.50634200 | 2.52621300  | -5.34701800 |
| C | -1.33824200 | 2.61039300  | -3.61810900 |
| H | -1.10153500 | 3.68556100  | -3.66095400 |
| H | -1.08403400 | 2.16432900  | -4.59181900 |
| H | -0.69127900 | 2.14807000  | -2.86373500 |
| C | -4.25129900 | 1.68866200  | 1.57047700  |
| H | -3.75741200 | 0.71883800  | 1.40596900  |
| C | -5.75815600 | 1.43037200  | 1.51921100  |
| H | -6.31834200 | 2.37354400  | 1.61998000  |

|   |             |             |             |
|---|-------------|-------------|-------------|
| H | -6.06596100 | 0.76294200  | 2.33955200  |
| H | -6.06032700 | 0.95688000  | 0.57463000  |
| C | -3.82969000 | 2.18877400  | 2.94709400  |
| H | -2.75956500 | 2.43777600  | 2.97681100  |
| H | -4.01703600 | 1.41415400  | 3.70524100  |
| H | -4.39666800 | 3.08278100  | 3.25080200  |
| C | 3.64268600  | -1.23548400 | -0.40683500 |
| C | 4.73554200  | -2.10275600 | -0.91234400 |
| C | 6.06814900  | -1.68121100 | -0.86344100 |
| H | 6.30004500  | -0.69011400 | -0.46864100 |
| C | 7.07018600  | -2.51992600 | -1.34587900 |
| H | 8.11058000  | -2.18869200 | -1.31137100 |
| C | 6.75161800  | -3.77080100 | -1.87385700 |
| H | 7.54283200  | -4.42368000 | -2.25006100 |
| C | 5.42207000  | -4.18677100 | -1.92430000 |
| H | 5.16664100  | -5.16491900 | -2.33795900 |
| C | 4.41252800  | -3.35456600 | -1.44610900 |
| H | 3.36984300  | -3.67623500 | -1.47691400 |
| C | 2.99011100  | 0.00614700  | -2.53821500 |
| C | 4.42542800  | 0.36431300  | -2.93110800 |
| H | 4.89060400  | 1.00880600  | -2.17242700 |
| H | 4.41716000  | 0.89512900  | -3.89483100 |
| H | 5.05348300  | -0.52895100 | -3.04905800 |
| C | 2.44830500  | -1.09636200 | -3.44913300 |
| H | 3.06838700  | -2.00238700 | -3.38341700 |
| H | 2.46128400  | -0.75534900 | -4.49568400 |
| H | 1.41241400  | -1.34380300 | -3.17925100 |
| C | 2.10930800  | 1.24776700  | -2.63935600 |
| H | 2.47412500  | 2.03752500  | -1.96462000 |
| H | 1.07433100  | 0.99300400  | -2.36682000 |
| H | 2.09835800  | 1.63193800  | -3.66965800 |
| C | 3.69039500  | -1.78703800 | 2.08208200  |
| C | 5.12150600  | -1.34965400 | 2.40493400  |
| H | 5.20869700  | -0.25440000 | 2.35891700  |
| H | 5.84303100  | -1.77945500 | 1.69731300  |
| H | 5.39870700  | -1.68698200 | 3.41523100  |
| C | 2.75226700  | -1.30506300 | 3.18490000  |
| H | 3.04419500  | -1.73910100 | 4.15184600  |
| H | 1.71666100  | -1.60274600 | 2.96764900  |
| H | 2.79437900  | -0.20831800 | 3.27673100  |
| C | 3.59538200  | -3.31013600 | 1.97238600  |
| H | 3.86461500  | -3.77036300 | 2.93506500  |
| H | 4.27778700  | -3.70650400 | 1.20797900  |
| H | 2.56801700  | -3.61206100 | 1.71872900  |
| C | -0.71222500 | 0.10555700  | 0.83785100  |
| H | -0.63258700 | 1.20716600  | 0.83207800  |
| C | -1.14157400 | -0.34642700 | 2.22992000  |
| H | -0.96390800 | -1.43236500 | 2.29750800  |
| H | -2.23265600 | -0.22413500 | 2.31721600  |
| C | -0.48075900 | 0.37727000  | 3.39184400  |
| H | 0.61270400  | 0.33353100  | 3.33657400  |
| H | -0.73467800 | 1.44586100  | 3.39327300  |
| H | -0.79518100 | -0.05974700 | 4.35336300  |
| C | 1.15650900  | 3.92057400  | 1.81024800  |
| C | 1.63877500  | 4.12718700  | 0.33351500  |
| B | 2.47611100  | 2.12869700  | 1.19988600  |
| O | 1.31699500  | 2.52970100  | 1.98295000  |
| O | 2.69884800  | 3.19421700  | 0.22503800  |
| H | 3.50969200  | 1.87645800  | 1.84635600  |
| C | 5.59653100  | 2.54723600  | 0.04495000  |
| O | 5.93067500  | 1.38669500  | 0.10067500  |
| H | 5.08637100  | 2.94646000  | -0.86337500 |
| C | 5.80972700  | 3.54824400  | 1.13252100  |
| H | 6.40180900  | 4.37239000  | 0.69098700  |
| H | 4.80947500  | 3.97828700  | 1.31305400  |
| C | 6.44076500  | 2.99097200  | 2.39013800  |
| H | 7.40905800  | 2.51466600  | 2.17593200  |
| H | 6.60103100  | 3.78268500  | 3.13616300  |
| H | 5.78627000  | 2.22836900  | 2.83707700  |

|   |             |            |             |
|---|-------------|------------|-------------|
| C | 2.17606300  | 5.51754700 | 0.03220900  |
| H | 1.40251100  | 6.28599800 | 0.18732600  |
| H | 3.04098000  | 5.75866600 | 0.66433700  |
| H | 2.50091800  | 5.56962400 | -1.01808900 |
| C | 2.04877300  | 4.64755900 | 2.81803500  |
| H | 1.91312400  | 5.73928000 | 2.79284800  |
| H | 1.79764800  | 4.28708700 | 3.82636100  |
| H | 3.10945100  | 4.41893600 | 2.63871200  |
| C | -0.29768800 | 4.28844800 | 2.05588900  |
| H | -0.54911200 | 4.12156500 | 3.11453900  |
| H | -0.48695700 | 5.34884900 | 1.82607500  |
| H | -0.97569900 | 3.67837300 | 1.44534900  |
| C | 0.54494100  | 3.77779800 | -0.67333500 |
| H | -0.29296600 | 4.48903600 | -0.64981400 |
| H | 0.96900800  | 3.78448200 | -1.68698500 |
| H | 0.13853200  | 2.77342200 | -0.48373600 |

Cartesian coordinates of the optimized geometry of EtCHO at M06-2X-D3/def2-SVP level of theory:

|   |             |             |             |
|---|-------------|-------------|-------------|
| O | -1.82367500 | -0.01135600 | -0.26962200 |
| C | -0.77954500 | -0.26724500 | 0.26095600  |
| H | -0.67136000 | -1.19102300 | 0.88787500  |
| C | 0.46697200  | 0.57572300  | 0.16296000  |
| H | 0.60505600  | 1.05737200  | 1.14650600  |
| H | 0.28077000  | 1.36890600  | -0.57407300 |
| C | 1.69915200  | -0.26073400 | -0.17641000 |
| H | 1.60307700  | -0.72504200 | -1.16788000 |
| H | 2.60497100  | 0.35897400  | -0.18020200 |
| H | 1.84740800  | -1.06479800 | 0.55971500  |

Cartesian coordinates of the optimized geometry of HBPIn at M06-2X-D3/def2-SVP level of theory:

|   |             |             |             |
|---|-------------|-------------|-------------|
| C | 0.78224600  | -0.18346500 | 0.05464400  |
| C | -0.78224600 | -0.18346500 | -0.05464200 |
| O | -1.06206500 | 1.18460500  | -0.40678400 |
| O | 1.06206400  | 1.18460900  | 0.40678300  |
| B | 0.00000000  | 1.93686900  | -0.00000100 |
| H | -0.00000400 | 3.13318100  | -0.00000300 |
| C | -1.46771200 | -0.44630700 | 1.28393800  |
| H | -2.53739800 | -0.21936600 | 1.18102900  |
| H | -1.35684600 | -1.49414900 | 1.59547100  |
| H | -1.05352700 | 0.20127200  | 2.06982600  |
| C | -1.34589900 | -1.10016800 | -1.12696200 |
| H | -1.06482800 | -2.14508600 | -0.92845700 |
| H | -2.44228300 | -1.03103600 | -1.12708700 |
| H | -0.98617900 | -0.81763300 | -2.12345900 |
| C | 1.34590600  | -1.10016400 | 1.12696300  |
| H | 1.06483800  | -2.14508400 | 0.92846200  |
| H | 2.44228900  | -1.03102900 | 1.12708300  |
| H | 0.98619000  | -0.81762900 | 2.12346100  |
| C | 1.46770700  | -0.44630700 | -1.28393800 |
| H | 2.53739200  | -0.21936200 | -1.18103400 |
| H | 1.35684300  | -1.49415000 | -1.59546800 |
| H | 1.05351500  | 0.20126900  | -2.06982500 |

Cartesian coordinates of the optimized geometry of **S1** at M06-2X-D3/def2-SVP level of theory:

|    |             |             |             |
|----|-------------|-------------|-------------|
| Ga | 0.89626900  | 0.20712800  | -0.83564300 |
| Cl | 0.71828800  | -0.14889300 | -3.07556500 |
| Si | -0.67972200 | -1.11052900 | 0.43101500  |
| N  | 2.81110800  | -0.24041600 | -0.51044900 |
| N  | 1.24866900  | 2.15479000  | -0.78135000 |
| C  | 3.74174200  | 0.51765000  | -1.06876200 |

|   |             |             |             |
|---|-------------|-------------|-------------|
| C | 3.47253200  | 1.78129300  | -1.64682200 |
| H | 4.29255700  | 2.24449100  | -2.19020000 |
| C | 2.34369000  | 2.57729300  | -1.42875000 |
| C | 5.17305400  | 0.04404600  | -1.08884300 |
| H | 5.27196400  | -0.81905000 | -1.76232000 |
| H | 5.48049000  | -0.29550700 | -0.09022300 |
| H | 5.84286000  | 0.84103800  | -1.42803700 |
| C | 2.36211700  | 3.98705400  | -1.96752600 |
| H | 3.33760300  | 4.23039400  | -2.40213700 |
| H | 2.11289500  | 4.72449300  | -1.19385400 |
| H | 1.58977300  | 4.07075600  | -2.74846600 |
| C | 3.17267100  | -1.45984800 | 0.15787200  |
| C | 3.45699600  | -2.61780900 | -0.59237500 |
| C | 3.77991400  | -3.79246700 | 0.09662600  |
| H | 3.99700800  | -4.70013100 | -0.46988000 |
| C | 3.80355000  | -3.82668100 | 1.48467000  |
| H | 4.04690400  | -4.75389500 | 2.00596900  |
| C | 3.50280700  | -2.67758400 | 2.21129800  |
| H | 3.50586200  | -2.71881300 | 3.30015500  |
| C | 3.18922600  | -1.47748300 | 1.56981300  |
| C | 3.31946900  | -2.66284400 | -2.10497100 |
| H | 3.19704000  | -1.63650900 | -2.48007000 |
| C | 4.52533900  | -3.29496300 | -2.80457100 |
| H | 4.62611500  | -4.35952500 | -2.54585900 |
| H | 5.47016100  | -2.79899700 | -2.53738500 |
| H | 4.40232300  | -3.23301300 | -3.89558300 |
| C | 2.03257600  | -3.41520600 | -2.45167000 |
| H | 1.19423800  | -3.00766800 | -1.87328000 |
| H | 2.12696200  | -4.48382400 | -2.20006100 |
| H | 1.79101800  | -3.32085100 | -3.52079400 |
| C | 2.90849000  | -0.21730200 | 2.37044600  |
| H | 2.06672800  | 0.28724600  | 1.87001100  |
| C | 4.12716400  | 0.71570600  | 2.36005200  |
| H | 5.02168300  | 0.17928500  | 2.71367200  |
| H | 3.96307200  | 1.57094100  | 3.03223000  |
| H | 4.33801600  | 1.12021600  | 1.35935500  |
| C | 2.46115800  | -0.49650100 | 3.80318900  |
| H | 3.28514700  | -0.88995600 | 4.41904200  |
| H | 1.62328600  | -1.20582100 | 3.80135900  |
| H | 2.12286500  | 0.43994300  | 4.27119400  |
| C | 0.34296300  | 3.12995200  | -0.25341500 |
| C | -0.81056300 | 3.49570700  | -0.97107300 |
| C | -1.69167500 | 4.42048900  | -0.39745800 |
| H | -2.59738800 | 4.70126300  | -0.93919200 |
| C | -1.42326500 | 4.99838000  | 0.83655700  |
| H | -2.11582400 | 5.72404100  | 1.26552600  |
| C | -0.26440500 | 4.64813000  | 1.52391300  |
| H | -0.06357300 | 5.10301400  | 2.49433800  |
| C | 0.62895300  | 3.70666700  | 1.00727600  |
| C | -1.12351300 | 2.91459200  | -2.33760700 |
| H | -0.23960200 | 2.36847000  | -2.69489900 |
| C | -1.44924000 | 4.00013400  | -3.36772900 |
| H | -2.39483600 | 4.51233300  | -3.13365600 |
| H | -1.55430200 | 3.55176500  | -4.36617200 |
| H | -0.65832600 | 4.76305800  | -3.41425700 |
| C | -2.27051800 | 1.90716000  | -2.23512300 |
| H | -2.01432900 | 1.06598600  | -1.57007000 |
| H | -2.51011100 | 1.48865900  | -3.22329400 |
| H | -3.17141100 | 2.40225900  | -1.83570500 |
| C | 1.86415000  | 3.30944200  | 1.80473600  |
| H | 2.11958800  | 2.28309500  | 1.50420100  |
| C | 3.07484700  | 4.19689900  | 1.48386800  |
| H | 3.91397600  | 3.94424700  | 2.14940700  |
| H | 2.82611000  | 5.25904300  | 1.63718300  |
| H | 3.42526100  | 4.06684800  | 0.45189400  |
| C | 1.61312800  | 3.31427300  | 3.31459700  |
| H | 2.47339000  | 2.87649000  | 3.84075500  |
| H | 0.71806200  | 2.73534500  | 3.57932300  |
| H | 1.49135800  | 4.33723700  | 3.70154700  |

|   |             |             |             |
|---|-------------|-------------|-------------|
| N | -2.23745300 | -0.41231100 | 1.11070300  |
| N | -2.28513100 | -1.47118300 | -0.76571200 |
| C | -3.03442100 | -0.88404200 | 0.13580700  |
| C | -4.52115300 | -0.79802900 | 0.14487000  |
| C | -5.24336900 | -1.62632400 | 1.00977000  |
| H | -4.71025700 | -2.32917800 | 1.65293600  |
| C | -6.63431200 | -1.56608000 | 1.03011400  |
| H | -7.19583500 | -2.21878800 | 1.69972400  |
| C | -7.30719000 | -0.67301000 | 0.19480100  |
| H | -8.39675500 | -0.62336200 | 0.21422200  |
| C | -6.58654700 | 0.15411000  | -0.66593300 |
| H | -7.11000800 | 0.85407800  | -1.31839000 |
| C | -5.19414000 | 0.08986700  | -0.69621800 |
| H | -4.62301800 | 0.73871600  | -1.36140500 |
| C | -2.66866200 | -2.30360100 | -1.91433000 |
| C | -1.43608600 | -3.13872300 | -2.25817400 |
| H | -1.13062900 | -3.76091900 | -1.40390400 |
| H | -0.61015400 | -2.46856200 | -2.52850800 |
| H | -1.64766600 | -3.79084400 | -3.11795700 |
| C | -3.83732800 | -3.24530700 | -1.59413200 |
| H | -3.65317600 | -3.77942900 | -0.64899700 |
| H | -3.92589300 | -3.99081000 | -2.39768800 |
| H | -4.79724000 | -2.71783500 | -1.52056800 |
| C | -3.00362600 | -1.42379700 | -3.12336500 |
| H | -3.86725600 | -0.77504400 | -2.91693900 |
| H | -3.25038500 | -2.05714800 | -3.98873900 |
| H | -2.13358000 | -0.80259600 | -3.38001900 |
| C | -2.51207500 | 0.38011800  | 2.31933200  |
| C | -2.71857900 | -0.56737600 | 3.50602100  |
| H | -1.83761900 | -1.21866000 | 3.60172600  |
| H | -3.61439600 | -1.18902500 | 3.36000700  |
| H | -2.84666100 | 0.00476100  | 4.43707800  |
| C | -3.70948300 | 1.32240700  | 2.14674200  |
| H | -3.72444400 | 2.02648400  | 2.99120400  |
| H | -4.67256900 | 0.79706100  | 2.13063400  |
| H | -3.60653800 | 1.90645900  | 1.21860600  |
| C | -1.27173600 | 1.24295900  | 2.57050300  |
| H | -0.37946200 | 0.61428200  | 2.71259000  |
| H | -1.42336300 | 1.85089700  | 3.47476300  |
| H | -1.11250700 | 1.92534000  | 1.72216800  |
| O | 0.18483100  | -1.45606200 | 1.91393000  |
| C | -0.02618800 | -2.67363300 | 1.13936400  |
| H | 0.92657100  | -3.12328800 | 0.80852600  |
| C | -0.91566200 | -3.68106000 | 1.83893300  |
| H | -1.07921800 | -4.53773300 | 1.16358900  |
| H | -1.90909600 | -3.23640500 | 2.03157000  |
| C | -0.30014500 | -4.15015600 | 3.15497000  |
| H | -0.12896700 | -3.28704700 | 3.81489300  |
| H | -0.94408200 | -4.86991500 | 3.68104800  |
| H | 0.67551400  | -4.62696500 | 2.97383400  |

Cartesian coordinates of the optimized geometry of **S2** at M06-2X-D3/def2-SVP level of theory:

|    |             |             |             |
|----|-------------|-------------|-------------|
| Ga | 1.38118200  | -0.26932700 | -0.38439800 |
| Cl | 0.39344300  | -1.60314900 | -1.91648200 |
| Si | -2.07636000 | -1.10403100 | 1.93601000  |
| O  | -0.80678700 | -0.26968600 | 1.15358600  |
| N  | 1.40933800  | 1.48986200  | -1.28445700 |
| N  | 3.29875000  | -0.60706000 | -0.68921700 |
| N  | -3.10030000 | -1.76605000 | 0.44541300  |
| N  | -3.46537700 | 0.09265100  | 1.45180600  |
| C  | 2.20103700  | 1.63331600  | -2.34541100 |
| C  | 3.25048600  | 0.75012500  | -2.67474900 |
| H  | 3.76038100  | 0.94632300  | -3.61468600 |
| C  | 3.82435400  | -0.23702000 | -1.85339500 |
| C  | 1.99002600  | 2.81581800  | -3.25765700 |
| H  | 1.00900100  | 2.73783400  | -3.74794500 |



|   |             |             |             |
|---|-------------|-------------|-------------|
| H | 2.77186400  | 2.86504900  | -4.02238400 |
| H | 1.98096900  | 3.75172000  | -2.68159600 |
| C | 5.08538800  | -0.91144400 | -2.33135000 |
| H | 5.84238700  | -0.96119800 | -1.53791400 |
| H | 5.50200300  | -0.40199300 | -3.20682500 |
| H | 4.84207900  | -1.95057400 | -2.60460900 |
| C | 0.45621300  | 2.51594200  | -0.96631200 |
| C | -0.77893600 | 2.56885900  | -1.64169900 |
| C | -1.66247500 | 3.60871400  | -1.33008300 |
| H | -2.62299500 | 3.66352500  | -1.84664000 |
| C | -1.34407400 | 4.56339500  | -0.37310500 |
| H | -2.04610100 | 5.36674200  | -0.14436400 |
| C | -0.13486100 | 4.47777400  | 0.31066500  |
| H | 0.09665500  | 5.21676400  | 1.07767900  |
| C | 0.78185700  | 3.45921200  | 0.03403300  |
| C | -1.20367000 | 1.50629500  | -2.63994600 |
| H | -0.32846400 | 0.89288400  | -2.89621100 |
| C | -1.77194300 | 2.09458400  | -3.93438400 |
| H | -2.72795200 | 2.61045800  | -3.75827900 |
| H | -1.96348200 | 1.28928400  | -4.65812200 |
| H | -1.08545900 | 2.81717000  | -4.40056100 |
| C | -2.22203100 | 0.57396300  | -1.97671100 |
| H | -1.82562500 | 0.13067600  | -1.05072400 |
| H | -2.49371200 | -0.24501300 | -2.66054300 |
| H | -3.13486500 | 1.13910000  | -1.72367100 |
| C | 2.10193100  | 3.37894700  | 0.78697400  |
| H | 2.30365900  | 2.31076100  | 0.95077600  |
| C | 3.27489500  | 3.94175100  | -0.02475600 |
| H | 3.07017800  | 4.97804600  | -0.33613400 |
| H | 3.48535800  | 3.34097100  | -0.92093200 |
| H | 4.18896700  | 3.94765400  | 0.58931300  |
| C | 2.04630600  | 4.04565100  | 2.16184800  |
| H | 1.16584000  | 3.72236600  | 2.73615800  |
| H | 2.01658400  | 5.14280100  | 2.07790800  |
| H | 2.94466100  | 3.78625000  | 2.73979800  |
| C | 4.05365000  | -1.38002100 | 0.25022200  |
| C | 4.00520500  | -2.78669300 | 0.22767300  |
| C | 4.72855600  | -3.48985100 | 1.19786200  |
| H | 4.69696200  | -4.58124800 | 1.19784400  |
| C | 5.47753100  | -2.82533900 | 2.16074900  |
| H | 6.03266100  | -3.39158600 | 2.90996500  |
| C | 5.51251700  | -1.43342600 | 2.17217500  |
| H | 6.09840500  | -0.91934500 | 2.93513500  |
| C | 4.80529300  | -0.68699900 | 1.22662900  |
| C | 3.16674300  | -3.54764000 | -0.78462800 |
| H | 2.81923900  | -2.83794100 | -1.54857600 |
| C | 3.96280500  | -4.64890000 | -1.49043200 |
| H | 4.25488900  | -5.44822800 | -0.79275200 |
| H | 4.88142000  | -4.25555300 | -1.95068200 |
| H | 3.35115800  | -5.10861300 | -2.28012600 |
| C | 1.91759700  | -4.12556600 | -0.11074900 |
| H | 2.19490700  | -4.87914300 | 0.64337100  |
| H | 1.25899300  | -4.59552800 | -0.85573900 |
| H | 1.33747200  | -3.33785400 | 0.39122100  |
| C | 4.87925200  | 0.83327900  | 1.22715500  |
| H | 3.94255000  | 1.20295200  | 0.78342800  |
| C | 6.02656000  | 1.33617300  | 0.34016400  |
| H | 6.98170700  | 0.88929100  | 0.65764700  |
| H | 6.11926600  | 2.42991700  | 0.41545200  |
| H | 5.86535400  | 1.09083200  | -0.71809200 |
| C | 5.00560000  | 1.42926200  | 2.62972700  |
| H | 4.23807000  | 1.03800000  | 3.31344900  |
| H | 4.89960400  | 2.52315800  | 2.57974200  |
| H | 5.99266200  | 1.22316700  | 3.07045100  |
| C | -3.99291400 | -0.79186000 | 0.61202500  |
| C | -5.39513900 | -0.76009700 | 0.10304500  |
| C | -6.43950200 | -0.99171800 | 1.00538500  |
| H | -6.20513600 | -1.22079500 | 2.04708100  |
| C | -7.76179100 | -0.94756500 | 0.57037700  |

|   |             |             |             |
|---|-------------|-------------|-------------|
| H | -8.57224700 | -1.13683500 | 1.27561600  |
| C | -8.04784000 | -0.66114700 | -0.76533100 |
| H | -9.08372600 | -0.62095800 | -1.10511500 |
| C | -7.00866700 | -0.42831100 | -1.66524600 |
| H | -7.22932400 | -0.20198400 | -2.70924200 |
| C | -5.68320700 | -0.48152000 | -1.23523800 |
| H | -4.86671800 | -0.29035800 | -1.93253300 |
| C | -3.21957700 | -3.09710500 | -0.16002800 |
| C | -4.44811200 | -3.85767200 | 0.35319200  |
| H | -4.45844900 | -3.86234300 | 1.45402200  |
| H | -4.41521400 | -4.89996000 | 0.00246100  |
| H | -5.38495700 | -3.40969800 | -0.00709100 |
| C | -3.25087500 | -2.98427200 | -1.68802700 |
| H | -4.14348500 | -2.44279000 | -2.03075100 |
| H | -3.27346400 | -3.98952600 | -2.13488600 |
| H | -2.34790700 | -2.46382300 | -2.03835400 |
| C | -1.94403100 | -3.84791400 | 0.23690100  |
| H | -1.89722500 | -3.99477500 | 1.32633500  |
| H | -1.06393100 | -3.27057200 | -0.08747200 |
| H | -1.91459000 | -4.83244600 | -0.25179300 |
| C | -3.85359200 | 1.43082100  | 1.89693200  |
| C | -4.64850600 | 1.33896400  | 3.20539200  |
| H | -4.08290800 | 0.76148500  | 3.95119900  |
| H | -5.61672800 | 0.84457000  | 3.03951500  |
| H | -4.84061100 | 2.34420600  | 3.60948700  |
| C | -2.54008200 | 2.18609400  | 2.14157300  |
| H | -2.74558200 | 3.21829500  | 2.46180600  |
| H | -1.93190200 | 2.20140100  | 1.22453000  |
| H | -1.94936300 | 1.68945500  | 2.92713000  |
| C | -4.66601600 | 2.18482100  | 0.83988300  |
| H | -4.79902100 | 3.22629500  | 1.16786300  |
| H | -5.66175400 | 1.74799400  | 0.68581100  |
| H | -4.12782100 | 2.19508300  | -0.11922800 |
| C | 0.57541800  | -0.46320900 | 1.42554600  |
| H | 0.75874100  | -1.49403800 | 1.79532100  |
| C | 1.07189500  | 0.51799200  | 2.48538100  |
| H | 0.72166100  | 1.52149700  | 2.19313900  |
| H | 2.17632100  | 0.54320800  | 2.45794900  |
| C | 0.61327300  | 0.20742000  | 3.90710400  |
| H | -0.48418600 | 0.19073100  | 3.98270900  |
| H | 0.97345800  | -0.78216800 | 4.22634600  |
| H | 0.99084100  | 0.95643500  | 4.61952500  |

Cartesian coordinates of the optimized geometry of Int-3 at M06-2X-D3/def2-SVP level of theory:

|    |             |             |             |
|----|-------------|-------------|-------------|
| Ga | 1.92669100  | 0.06342000  | -0.44470000 |
| Cl | 0.81436200  | 0.48671600  | -2.36723900 |
| Si | -2.03724900 | 0.10730500  | 0.59044500  |
| O  | -0.43667600 | 0.44097000  | 1.03780500  |
| N  | 3.26817000  | 1.51009600  | -0.43930700 |
| N  | 3.22889700  | -1.34117000 | -0.93567100 |
| N  | -2.87340100 | 0.99222600  | -0.82071300 |
| N  | -2.45323700 | 2.03649700  | 1.02621100  |
| C  | 4.36075800  | 1.41867400  | -1.19373200 |
| C  | 4.75931500  | 0.25562100  | -1.87937700 |
| H  | 5.63191800  | 0.35715700  | -2.51977500 |
| C  | 4.27340900  | -1.05180700 | -1.70216400 |
| C  | 5.26964600  | 2.61683800  | -1.31108700 |
| H  | 6.19530700  | 2.35216000  | -1.83214300 |
| H  | 5.51076200  | 3.01189100  | -0.31398200 |
| H  | 4.76848300  | 3.42483800  | -1.85932400 |
| C  | 4.98861600  | -2.16388000 | -2.42676300 |
| H  | 5.10671200  | -3.05219100 | -1.79307200 |
| H  | 5.96903800  | -1.83422100 | -2.78749300 |
| H  | 4.37771400  | -2.46183900 | -3.29309000 |
| C  | 2.99349000  | 2.72631500  | 0.26707500  |
| C  | 2.48094100  | 3.85070300  | -0.41289500 |

|   |             |             |             |
|---|-------------|-------------|-------------|
| C | 2.27172600  | 5.02361400  | 0.32086900  |
| H | 1.87822100  | 5.90637900  | -0.18752200 |
| C | 2.53755700  | 5.08104200  | 1.68274700  |
| H | 2.36566300  | 6.00593900  | 2.23552700  |
| C | 2.99822400  | 3.94813100  | 2.34776400  |
| H | 3.17819200  | 3.99601800  | 3.42172000  |
| C | 3.23299200  | 2.75518000  | 1.65925900  |
| C | 2.10082100  | 3.82291300  | -1.88673200 |
| H | 2.44799200  | 2.87426900  | -2.32089400 |
| C | 2.71118300  | 4.98462000  | -2.67970600 |
| H | 2.28050400  | 5.94783100  | -2.36727200 |
| H | 2.49612500  | 4.86208500  | -3.75107300 |
| H | 3.80111500  | 5.05796200  | -2.55657300 |
| C | 0.57541300  | 3.84942000  | -2.03611300 |
| H | 0.10503800  | 3.02763900  | -1.47816900 |
| H | 0.29256900  | 3.74175800  | -3.09456600 |
| H | 0.17780100  | 4.80833400  | -1.66382500 |
| C | 3.75252800  | 1.52018700  | 2.38239700  |
| H | 3.21790400  | 0.65509800  | 1.95989800  |
| C | 5.24992200  | 1.28957900  | 2.14137500  |
| H | 5.83106900  | 2.17330500  | 2.44795500  |
| H | 5.47347800  | 1.07117100  | 1.08766300  |
| H | 5.59924200  | 0.43146500  | 2.73668600  |
| C | 3.46041200  | 1.53375200  | 3.88232100  |
| H | 2.40925900  | 1.78044300  | 4.09038700  |
| H | 4.09556900  | 2.26165200  | 4.41025300  |
| H | 3.66909300  | 0.54226000  | 4.31018200  |
| C | 2.92615000  | -2.69300300 | -0.57371300 |
| C | 2.10909200  | -3.48982800 | -1.39781100 |
| C | 1.78462300  | -4.77832300 | -0.95736300 |
| H | 1.14418300  | -5.40755800 | -1.57966100 |
| C | 2.25187000  | -5.26350700 | 0.25699000  |
| H | 1.97997800  | -6.26747800 | 0.58680400  |
| C | 3.06594900  | -4.46479100 | 1.05729000  |
| H | 3.42533300  | -4.85641700 | 2.00914500  |
| C | 3.42119500  | -3.17299300 | 0.66189100  |
| C | 1.56840600  | -2.99908700 | -2.73083600 |
| H | 1.98375400  | -2.00032400 | -2.92583800 |
| C | 1.97434100  | -3.92711000 | -3.88153700 |
| H | 1.50024700  | -4.91521100 | -3.77926100 |
| H | 3.06178600  | -4.08592200 | -3.92095100 |
| H | 1.65091100  | -3.50297400 | -4.84332600 |
| C | 0.04472600  | -2.84952800 | -2.68675900 |
| H | -0.43463300 | -3.83688800 | -2.59130800 |
| H | -0.31987000 | -2.37637600 | -3.61067900 |
| H | -0.27885100 | -2.22063100 | -1.84317500 |
| C | 4.34690300  | -2.32046100 | 1.52266800  |
| H | 4.01650100  | -1.27353000 | 1.42043600  |
| C | 5.79859900  | -2.38083000 | 1.02666600  |
| H | 6.14598600  | -3.42482800 | 0.98291200  |
| H | 6.45750700  | -1.83085500 | 1.71543200  |
| H | 5.91792600  | -1.93320700 | 0.03166400  |
| C | 4.30345100  | -2.68961100 | 3.00683900  |
| H | 3.27513500  | -2.76193800 | 3.38894500  |
| H | 4.83728600  | -1.92875500 | 3.59545300  |
| H | 4.80404000  | -3.65188400 | 3.19342500  |
| C | -3.00448700 | 2.15669800  | -0.15635900 |
| C | -3.69780700 | 3.37392900  | -0.66988100 |
| C | -5.03208500 | 3.59293600  | -0.31733400 |
| H | -5.54783500 | 2.86694600  | 0.31488000  |
| C | -5.69074500 | 4.73939300  | -0.75782400 |
| H | -6.73257900 | 4.90640000  | -0.48119700 |
| C | -5.01607500 | 5.67397000  | -1.54301800 |
| H | -5.53048100 | 6.57369000  | -1.88359700 |
| C | -3.68299200 | 5.45651900  | -1.89317800 |
| H | -3.15299500 | 6.18382400  | -2.50972400 |
| C | -3.02448000 | 4.30727300  | -1.46178000 |
| H | -1.98812000 | 4.12300300  | -1.74576900 |
| C | -3.54084000 | 0.53932500  | -2.05725100 |

|   |             |             |             |
|---|-------------|-------------|-------------|
| C | -5.00986700 | 0.19993000  | -1.77458100 |
| H | -5.07416200 | -0.62445300 | -1.04827100 |
| H | -5.50832500 | -0.12178500 | -2.70174600 |
| H | -5.55169600 | 1.07437000  | -1.38427200 |
| C | -3.43874900 | 1.58653900  | -3.17447600 |
| H | -4.09808500 | 2.44823900  | -3.01238600 |
| H | -3.73033100 | 1.11896800  | -4.12600100 |
| H | -2.39960600 | 1.93731900  | -3.26727600 |
| C | -2.82144100 | -0.72618000 | -2.53251300 |
| H | -2.93865000 | -1.53982800 | -1.80513400 |
| H | -1.74996200 | -0.52203300 | -2.67069400 |
| H | -3.25442700 | -1.04806100 | -3.49165400 |
| C | -1.96167400 | 3.08952900  | 1.93064300  |
| C | -3.01605700 | 4.16180200  | 2.24128500  |
| H | -3.96502500 | 3.69781900  | 2.55123000  |
| H | -3.21183600 | 4.82453300  | 1.38834500  |
| H | -2.65316300 | 4.78368300  | 3.07314400  |
| C | -1.54095100 | 2.43290500  | 3.25088400  |
| H | -0.96873600 | 3.15895700  | 3.84691300  |
| H | -0.90535400 | 1.55936100  | 3.05305100  |
| H | -2.41345300 | 2.12563500  | 3.84035400  |
| C | -0.72236600 | 3.73835200  | 1.30417400  |
| H | -0.30481900 | 4.49788700  | 1.98138600  |
| H | -0.97684200 | 4.23158800  | 0.35506200  |
| H | 0.04562600  | 2.97254100  | 1.11395700  |
| C | 0.61959700  | -0.50084000 | 0.96320800  |
| H | 0.24170600  | -1.44777300 | 0.51762100  |
| C | 1.09078400  | -0.84278000 | 2.37146100  |
| H | 1.35511200  | 0.09121100  | 2.89258300  |
| H | 2.01130700  | -1.44206300 | 2.30464700  |
| C | 0.03625900  | -1.60135400 | 3.17068700  |
| H | -0.89476900 | -1.02144700 | 3.25187500  |
| H | -0.22416500 | -2.55206800 | 2.68003700  |
| H | 0.38428100  | -1.82427700 | 4.19025500  |
| C | -3.42603400 | -0.62724600 | 1.73131700  |
| O | -3.05880000 | -1.95674500 | 2.11453100  |
| H | -4.28315900 | -0.69514600 | 1.03089000  |
| C | -3.91416400 | 0.07657500  | 2.98799200  |
| H | -3.09439300 | 0.09288900  | 3.72329500  |
| H | -4.13961200 | 1.12337000  | 2.73506300  |
| C | -5.13590700 | -0.60068000 | 3.60123200  |
| H | -5.47198000 | -0.08116100 | 4.51009900  |
| H | -5.97521300 | -0.61390000 | 2.88804800  |
| H | -4.90379000 | -1.64079100 | 3.86811600  |
| H | -1.72107100 | -1.20361600 | -0.09079900 |
| C | -2.96748300 | -5.06301200 | 0.42977400  |
| C | -4.02827400 | -4.27107700 | -0.41640100 |
| O | -3.83650200 | -2.92515300 | 0.04157100  |
| O | -2.88387300 | -4.28202200 | 1.62584500  |
| C | -3.80360800 | -4.32527500 | -1.91817800 |
| H | -3.86486200 | -5.36243800 | -2.28098000 |
| H | -4.57798600 | -3.73379100 | -2.42753000 |
| H | -2.82528000 | -3.90861400 | -2.18964400 |
| C | -5.46278500 | -4.66505600 | -0.07349500 |
| H | -5.62064700 | -4.64447100 | 1.01453700  |
| H | -6.14660500 | -3.93922600 | -0.53484100 |
| H | -5.70906000 | -5.66858000 | -0.44746700 |
| C | -1.58041000 | -5.04124100 | -0.20592500 |
| H | -0.85315900 | -5.42042700 | 0.52518000  |
| H | -1.53240700 | -5.66225700 | -1.11294400 |
| H | -1.29043300 | -4.01138800 | -0.46437500 |
| C | -3.37307600 | -6.48369600 | 0.78314400  |
| H | -3.53401200 | -7.07959800 | -0.12771700 |
| H | -2.57197800 | -6.95539600 | 1.36869100  |
| H | -4.28907300 | -6.49762100 | 1.38606700  |
| B | -3.24388100 | -2.99869400 | 1.28780600  |

Cartesian coordinates of the optimized geometry of TS-2 at M06-2X-D3/def2-SVP level of theory:

|    |             |             |             |
|----|-------------|-------------|-------------|
| Ga | 0.95073300  | -0.03088300 | -0.70726500 |
| Cl | 0.85132000  | -0.79496000 | -2.84726900 |
| Si | -1.03674600 | -0.44598400 | 0.52809300  |
| N  | 2.94912700  | -0.18579200 | -0.44946800 |
| N  | 1.08810100  | 1.96211100  | -1.06217100 |
| C  | 3.74176000  | 0.57244600  | -1.21090400 |
| C  | 3.32839600  | 1.72044200  | -1.90686000 |
| H  | 4.08472400  | 2.20108600  | -2.52207700 |
| C  | 2.13754300  | 2.44151300  | -1.72019200 |
| C  | 5.20592600  | 0.21773000  | -1.33470600 |
| H  | 5.31732900  | -0.75575100 | -1.83172000 |
| H  | 5.67193500  | 0.12038100  | -0.34453300 |
| H  | 5.73947400  | 0.97810900  | -1.91399200 |
| C  | 2.12184100  | 3.85967100  | -2.24031800 |
| H  | 2.34613000  | 4.55644700  | -1.41826300 |
| H  | 1.13636500  | 4.13485900  | -2.63681000 |
| H  | 2.88496500  | 3.98715900  | -3.01665600 |
| C  | 3.58712000  | -1.21837800 | 0.32210000  |
| C  | 3.92259500  | -2.45274200 | -0.26728700 |
| C  | 4.57033700  | -3.41306800 | 0.51892100  |
| H  | 4.82857800  | -4.37650200 | 0.07538500  |
| C  | 4.88725500  | -3.16378600 | 1.84724200  |
| H  | 5.39518500  | -3.92350500 | 2.44309500  |
| C  | 4.54254000  | -1.94247500 | 2.41938300  |
| H  | 4.77769700  | -1.76002500 | 3.46799300  |
| C  | 3.88677900  | -0.95731400 | 1.67752600  |
| C  | 3.55867500  | -2.79519900 | -1.70150200 |
| H  | 3.25266500  | -1.87221000 | -2.21295000 |
| C  | 4.71633000  | -3.41704600 | -2.48729600 |
| H  | 4.98662400  | -4.40866800 | -2.09455900 |
| H  | 5.62092500  | -2.79141100 | -2.46153200 |
| H  | 4.42403100  | -3.55048300 | -3.53893000 |
| C  | 2.34516100  | -3.72797400 | -1.70046700 |
| H  | 1.54176600  | -3.30190400 | -1.08616800 |
| H  | 2.61201600  | -4.71013000 | -1.27733800 |
| H  | 1.95742000  | -3.87169100 | -2.71985700 |
| C  | 3.48525800  | 0.35921500  | 2.32687000  |
| H  | 2.55849800  | 0.68996500  | 1.83140300  |
| C  | 4.53536000  | 1.45195600  | 2.09229600  |
| H  | 5.51548400  | 1.13784900  | 2.48429000  |
| H  | 4.24593700  | 2.38110800  | 2.60781500  |
| H  | 4.64851000  | 1.68645900  | 1.02381300  |
| C  | 3.17855100  | 0.20219500  | 3.81634400  |
| H  | 4.08750700  | -0.00910400 | 4.39923200  |
| H  | 2.45673500  | -0.61035800 | 3.98710100  |
| H  | 2.74623400  | 1.12874200  | 4.21706000  |
| C  | 0.06851300  | 2.88852000  | -0.67989800 |
| C  | -1.17042700 | 2.91311800  | -1.35865800 |
| C  | -2.09811700 | 3.89849300  | -1.00236900 |
| H  | -3.05676900 | 3.94463600  | -1.51924800 |
| C  | -1.82220500 | 4.83203600  | -0.00733700 |
| H  | -2.55773900 | 5.59795500  | 0.24320800  |
| C  | -0.61725000 | 4.76677800  | 0.68044100  |
| H  | -0.41878300 | 5.47420800  | 1.48765200  |
| C  | 0.33612400  | 3.79191200  | 0.37031900  |
| C  | -1.48043500 | 1.92448000  | -2.47216100 |
| H  | -1.07927700 | 0.95027700  | -2.16079800 |
| C  | -0.78122500 | 2.28664900  | -3.78610900 |
| H  | -1.07484000 | 3.29448500  | -4.12104100 |
| H  | -1.05702500 | 1.56392000  | -4.56795300 |
| H  | 0.31125400  | 2.24440100  | -3.68393700 |
| C  | -2.97949100 | 1.73193100  | -2.69230500 |
| H  | -3.48411800 | 1.50062300  | -1.74015000 |
| H  | -3.14927800 | 0.90014700  | -3.39037000 |
| H  | -3.45263900 | 2.62576700  | -3.12702500 |
| C  | 1.57651100  | 3.66471400  | 1.24070500  |
| H  | 2.31393300  | 3.03444400  | 0.72074000  |

|   |             |             |             |
|---|-------------|-------------|-------------|
| C | 2.24464300  | 5.00644600  | 1.54929900  |
| H | 3.19593700  | 4.84106300  | 2.07599600  |
| H | 1.61661200  | 5.63248800  | 2.20052200  |
| H | 2.45648100  | 5.57913000  | 0.63447600  |
| C | 1.18780500  | 2.94380800  | 2.53680200  |
| H | 2.05836400  | 2.84857000  | 3.20155300  |
| H | 0.78970300  | 1.93667100  | 2.33532100  |
| H | 0.40884400  | 3.51015700  | 3.07157000  |
| N | -2.79737500 | 0.15620800  | 0.97927300  |
| N | -2.32477700 | -1.67689700 | -0.07681600 |
| C | -3.31986500 | -0.90938000 | 0.40919300  |
| C | -4.77370800 | -1.23377000 | 0.34859700  |
| C | -5.30007500 | -2.17350900 | 1.24062200  |
| H | -4.64001200 | -2.65349700 | 1.96583800  |
| C | -6.65361800 | -2.49530200 | 1.19265600  |
| H | -7.06181100 | -3.22760200 | 1.89029400  |
| C | -7.48360100 | -1.88779600 | 0.24924200  |
| H | -8.54255700 | -2.14634400 | 0.20768700  |
| C | -6.96039000 | -0.94804800 | -0.63786500 |
| H | -7.60718300 | -0.46954400 | -1.37416500 |
| C | -5.60751100 | -0.61449100 | -0.58560600 |
| H | -5.19455200 | 0.12567900  | -1.27349300 |
| C | -2.44326000 | -2.65293000 | -1.18796600 |
| C | -1.10501100 | -3.36961500 | -1.32091100 |
| H | -0.87762000 | -3.96342000 | -0.42633900 |
| H | -0.30143000 | -2.64786600 | -1.49377900 |
| H | -1.13521600 | -4.04234600 | -2.19012100 |
| C | -3.52577500 | -3.71046300 | -0.92917300 |
| H | -3.42651900 | -4.12912400 | 0.08310100  |
| H | -3.38626600 | -4.52776800 | -1.65117400 |
| H | -4.54483400 | -3.32565100 | -1.05790500 |
| C | -2.74013400 | -1.90092700 | -2.49045900 |
| H | -3.68673300 | -1.34519500 | -2.41391100 |
| H | -2.82813900 | -2.61067500 | -3.32640700 |
| H | -1.92119400 | -1.20264400 | -2.72193900 |
| C | -3.34035300 | 1.08925900  | 1.97784700  |
| C | -3.84566200 | 0.31933300  | 3.20308200  |
| H | -3.05928900 | -0.36173600 | 3.56104900  |
| H | -4.75079500 | -0.25919700 | 2.97265300  |
| H | -4.09155200 | 1.02556700  | 4.00962700  |
| C | -4.44775700 | 1.96156200  | 1.38077000  |
| H | -4.75553300 | 2.71869100  | 2.11708100  |
| H | -5.33356300 | 1.36977300  | 1.11292800  |
| H | -4.07440300 | 2.48358900  | 0.48700800  |
| C | -2.16059900 | 1.96870100  | 2.39250300  |
| H | -1.38751300 | 1.35225600  | 2.87393900  |
| H | -2.49141500 | 2.74606900  | 3.09644200  |
| H | -1.72616500 | 2.45952400  | 1.50905100  |
| O | -0.44910400 | -0.76797600 | 2.05586300  |
| C | 0.54850800  | -1.58766600 | 1.37207800  |
| H | 1.53744400  | -1.23029200 | 1.68714100  |
| C | 0.40600900  | -3.04469300 | 1.75497500  |
| H | 1.04928800  | -3.65921700 | 1.10200400  |
| H | -0.63504000 | -3.36114500 | 1.57445800  |
| C | 0.76748400  | -3.28962800 | 3.22105300  |
| H | 0.59049700  | -4.33283100 | 3.52418300  |
| H | 1.83118500  | -3.06232300 | 3.39520200  |
| H | 0.16678200  | -2.63247200 | 3.86698800  |

Cartesian coordinates of the optimized geometry of TS-7 at M06-2X-D3/def2-SVP level of theory:

|    |             |             |             |
|----|-------------|-------------|-------------|
| Ga | 2.30009100  | -0.36144700 | -0.39549900 |
| Cl | 1.23176900  | 0.25837500  | -2.28192500 |
| Si | -1.50463600 | 0.70639200  | 0.47254100  |
| O  | 0.10386100  | 0.63026400  | 0.94984400  |
| N  | 3.87751900  | 0.81521900  | -0.31947600 |
| N  | 3.29829900  | -1.96208500 | -0.97776300 |

|   |             |             |             |
|---|-------------|-------------|-------------|
| N | -2.02128100 | 1.59975500  | -1.06099700 |
| N | -1.42513400 | 2.67527300  | 0.71780000  |
| C | 4.91525800  | 0.58843200  | -1.11884700 |
| C | 5.12142700  | -0.61720300 | -1.81652000 |
| H | 6.00225600  | -0.64879300 | -2.45294200 |
| C | 4.42024800  | -1.82919600 | -1.68048200 |
| C | 5.94451800  | 1.67232800  | -1.31867800 |
| H | 6.88074300  | 1.25477600  | -1.70472800 |
| H | 6.14000700  | 2.22477800  | -0.39104000 |
| H | 5.55665100  | 2.39381100  | -2.05352100 |
| C | 4.99892100  | -3.04045500 | -2.36768100 |
| H | 5.08552600  | -3.88421500 | -1.66908900 |
| H | 5.98179900  | -2.81684500 | -2.79483900 |
| H | 4.32362200  | -3.36428100 | -3.17261300 |
| C | 3.79093800  | 2.01787900  | 0.45903300  |
| C | 3.30788500  | 3.20768700  | -0.11916200 |
| C | 3.19912800  | 4.34248900  | 0.69415900  |
| H | 2.82002200  | 5.27186000  | 0.26309200  |
| C | 3.55344400  | 4.30365700  | 2.03604400  |
| H | 3.45326500  | 5.19626700  | 2.65531500  |
| C | 4.03104500  | 3.11944400  | 2.59299400  |
| H | 4.30438400  | 3.09895600  | 3.64808800  |
| C | 4.16345800  | 1.96178800  | 1.82219800  |
| C | 2.88077500  | 3.29544000  | -1.57444900 |
| H | 3.09317500  | 2.33261700  | -2.05904700 |
| C | 3.62592800  | 4.40216000  | -2.32959500 |
| H | 3.35723800  | 5.39563800  | -1.93970700 |
| H | 3.35533400  | 4.38141600  | -3.39540500 |
| H | 4.71764500  | 4.30310300  | -2.24837700 |
| C | 1.36989400  | 3.52537700  | -1.67405200 |
| H | 0.80802300  | 2.81888200  | -1.04353400 |
| H | 1.03251600  | 3.39273700  | -2.71379900 |
| H | 1.12868100  | 4.55310600  | -1.35826000 |
| C | 4.73946100  | 0.68586800  | 2.42075400  |
| H | 4.19441900  | -0.15607400 | 1.96693300  |
| C | 6.22130100  | 0.51478000  | 2.05813300  |
| H | 6.79773000  | 1.39877100  | 2.37217900  |
| H | 6.37134800  | 0.36797700  | 0.98036700  |
| H | 6.63963900  | -0.36329500 | 2.57248000  |
| C | 4.56762200  | 0.59219100  | 3.93679600  |
| H | 3.53374700  | 0.79570100  | 4.24896400  |
| H | 5.23002000  | 1.29927000  | 4.45909400  |
| H | 4.83783500  | -0.41700500 | 4.28047000  |
| C | 2.74760200  | -3.26540200 | -0.74872700 |
| C | 1.95841900  | -3.90417800 | -1.72686500 |
| C | 1.48407900  | -5.19273800 | -1.45366700 |
| H | 0.87565200  | -5.70489300 | -2.20188700 |
| C | 1.76115500  | -5.82519300 | -0.24806900 |
| H | 1.38507400  | -6.83201100 | -0.05906500 |
| C | 2.50127300  | -5.16255300 | 0.72704200  |
| H | 2.69527700  | -5.65504200 | 1.68051000  |
| C | 3.00567100  | -3.87994400 | 0.49701700  |
| C | 1.55145600  | -3.22848700 | -3.02610800 |
| H | 2.11845100  | -2.29132300 | -3.12416000 |
| C | 1.82512200  | -4.09827700 | -4.25719100 |
| H | 1.18422000  | -4.99252600 | -4.26710500 |
| H | 2.86979100  | -4.43912100 | -4.30365100 |
| H | 1.60875000  | -3.53045700 | -5.17333500 |
| C | 0.06768700  | -2.84758600 | -2.96473500 |
| H | -0.56418300 | -3.74670600 | -2.87505600 |
| H | -0.23066300 | -2.30093900 | -3.87144500 |
| H | -0.13193600 | -2.18814700 | -2.10858200 |
| C | 3.85045200  | -3.17935100 | 1.54867700  |
| H | 3.67773000  | -2.09974800 | 1.42882700  |
| C | 5.34818100  | -3.41439500 | 1.31838800  |
| H | 5.57352800  | -4.49215300 | 1.31623600  |
| H | 5.93613200  | -2.94391000 | 2.12085100  |
| H | 5.68667100  | -2.98708700 | 0.36403900  |
| C | 3.46052400  | -3.55528400 | 2.97812400  |

|   |             |             |             |
|---|-------------|-------------|-------------|
| H | 2.37407000  | -3.48269000 | 3.13412300  |
| H | 3.95427500  | -2.87904600 | 3.69154900  |
| H | 3.77564900  | -4.57926900 | 3.22904000  |
| C | -1.96813300 | 2.81186200  | -0.46595400 |
| C | -2.55777700 | 4.07904200  | -0.99265500 |
| C | -3.81179000 | 4.46463600  | -0.50656800 |
| H | -4.34963700 | 3.80264000  | 0.17561400  |
| C | -4.37690400 | 5.67223000  | -0.90966500 |
| H | -5.35730300 | 5.96415300  | -0.53121900 |
| C | -3.69036600 | 6.50259200  | -1.79606500 |
| H | -4.13057400 | 7.45058000  | -2.10849700 |
| C | -2.44375400 | 6.11595500  | -2.28662400 |
| H | -1.90524400 | 6.76054900  | -2.98251500 |
| C | -1.87811400 | 4.90561200  | -1.88903300 |
| H | -0.90064400 | 4.60467700  | -2.26440900 |
| C | -2.67634700 | 1.24737600  | -2.34163400 |
| C | -4.16174000 | 1.63314600  | -2.33548000 |
| H | -4.63442200 | 1.23101600  | -1.42597800 |
| H | -4.65401600 | 1.18208400  | -3.21005900 |
| H | -4.31306900 | 2.71901500  | -2.39290800 |
| C | -1.92972100 | 1.90536800  | -3.50766700 |
| H | -2.02524400 | 2.99847700  | -3.48938700 |
| H | -2.35299100 | 1.55217700  | -4.45950100 |
| H | -0.86519400 | 1.63096800  | -3.47063000 |
| C | -2.59350800 | -0.26872900 | -2.50611800 |
| H | -3.25641400 | -0.76273600 | -1.78234300 |
| H | -1.55457300 | -0.60672400 | -2.38865500 |
| H | -2.93667900 | -0.53717300 | -3.51569400 |
| C | -1.11226900 | 3.64888700  | 1.77307200  |
| C | -2.32627100 | 3.84500400  | 2.69171300  |
| H | -2.64714100 | 2.89039400  | 3.13147400  |
| H | -3.17182800 | 4.27829900  | 2.13874300  |
| H | -2.06707400 | 4.53130600  | 3.51158700  |
| C | 0.04807000  | 3.06328700  | 2.58702300  |
| H | 0.31962600  | 3.75782400  | 3.39563800  |
| H | 0.92432200  | 2.89290800  | 1.94382700  |
| H | -0.23271300 | 2.09668700  | 3.02797200  |
| C | -0.66745400 | 5.00982900  | 1.22243900  |
| H | -0.24836900 | 5.60293500  | 2.04852400  |
| H | -1.49469100 | 5.58224500  | 0.78361000  |
| H | 0.11727100  | 4.87516100  | 0.46546700  |
| C | 0.98459000  | -0.46772800 | 1.11274800  |
| H | 0.43807400  | -1.41408200 | 0.96747900  |
| C | 1.50918700  | -0.43624500 | 2.54651800  |
| H | 1.91583300  | 0.57204600  | 2.72896700  |
| H | 2.34566700  | -1.14177600 | 2.66335200  |
| C | 0.42963800  | -0.76018600 | 3.57283800  |
| H | -0.45183800 | -0.12177600 | 3.42424600  |
| H | 0.09664300  | -1.80606400 | 3.47924800  |
| H | 0.78606300  | -0.61246300 | 4.60281000  |
| C | -3.18466600 | 0.56514300  | 1.42385900  |
| O | -4.07057300 | -0.14284200 | 0.59158800  |
| H | -3.53332400 | 1.61491400  | 1.38884600  |
| C | -3.19306000 | 0.17960500  | 2.90441200  |
| H | -2.92648400 | -0.88079800 | 3.02490000  |
| H | -2.39572700 | 0.75817600  | 3.40454100  |
| C | -4.53366600 | 0.46870500  | 3.57541300  |
| H | -4.51327800 | 0.19421900  | 4.64015600  |
| H | -4.77708000 | 1.54143100  | 3.50538700  |
| H | -5.32923200 | -0.10633300 | 3.08475100  |
| H | -1.48059800 | -0.85234500 | -0.01034300 |
| C | -6.13351100 | -2.53470800 | -0.45185800 |
| C | -6.22410600 | -2.88761600 | 1.07274100  |
| O | -5.39122600 | -1.90259100 | 1.65496200  |
| O | -4.79084300 | -2.09989700 | -0.57336400 |
| C | -7.62123900 | -2.77616600 | 1.66588900  |
| H | -8.32552700 | -3.44655400 | 1.14955200  |
| H | -7.59198700 | -3.05716700 | 2.72856000  |
| H | -7.99115600 | -1.74557700 | 1.59710000  |



|   |             |             |             |
|---|-------------|-------------|-------------|
| C | -5.63835700 | -4.27132800 | 1.36848600  |
| H | -4.66168900 | -4.38265100 | 0.87651100  |
| H | -5.48962800 | -4.36079900 | 2.45387100  |
| H | -6.30044100 | -5.08225100 | 1.03107700  |
| C | -7.04841100 | -1.36394400 | -0.81878300 |
| H | -6.77716100 | -1.01424500 | -1.82519700 |
| H | -8.11072000 | -1.64924400 | -0.81694700 |
| H | -6.89528100 | -0.53285900 | -0.11520800 |
| C | -6.37477800 | -3.70676500 | -1.39173900 |
| H | -7.37638300 | -4.13684400 | -1.23811500 |
| H | -6.30332600 | -3.36216300 | -2.43355100 |
| H | -5.62304200 | -4.49221400 | -1.24151700 |
| B | -4.39821400 | -1.53004800 | 0.69221800  |
| C | -2.15836700 | -2.40665500 | 0.22370400  |
| H | -2.45845300 | -2.31695000 | -0.83173000 |
| O | -3.03550900 | -2.26059700 | 1.11163500  |
| C | -1.01243300 | -3.31695800 | 0.55890500  |
| H | -0.17396000 | -3.18295200 | -0.13718800 |
| H | -0.67208700 | -3.09979700 | 1.58056400  |
| C | -1.54930900 | -4.75210000 | 0.48211200  |
| H | -0.75257600 | -5.46472400 | 0.72779000  |
| H | -2.37827800 | -4.88495500 | 1.18990600  |
| H | -1.91819500 | -4.98386500 | -0.52856700 |

Cartesian coordinates of the optimized geometry of TS-10 at M06-2X-D3/def2-SVP level of theory:

|    |             |             |             |
|----|-------------|-------------|-------------|
| Ga | -1.91186800 | -0.61913000 | -0.60063100 |
| Cl | -1.14852800 | -0.82259800 | -2.70360800 |
| Si | 2.17102300  | 0.53424200  | 0.35836400  |
| O  | 0.64964700  | -0.12582500 | 0.25943100  |
| N  | -2.68408600 | -2.39493500 | -0.23781700 |
| N  | -3.66174000 | 0.23456500  | -0.93355500 |
| N  | 2.98768700  | 0.15063600  | -1.23282000 |
| N  | 3.23571300  | -0.95297100 | 0.59836000  |
| C  | -3.74584200 | -2.78233700 | -0.94289100 |
| C  | -4.62574200 | -1.88659600 | -1.57320900 |
| H  | -5.45819200 | -2.33370200 | -2.11111200 |
| C  | -4.65204000 | -0.48047400 | -1.45363700 |
| C  | -4.01738800 | -4.25819000 | -1.09182900 |
| H  | -3.24700700 | -4.68468200 | -1.75394700 |
| H  | -5.00343800 | -4.43920400 | -1.53298600 |
| H  | -3.93925900 | -4.78520200 | -0.13239400 |
| C  | -5.89221800 | 0.22834000  | -1.93581200 |
| H  | -6.25850500 | 0.92679300  | -1.17010600 |
| H  | -6.68120800 | -0.48893500 | -2.18402400 |
| H  | -5.65949200 | 0.82725700  | -2.82721200 |
| C  | -2.00431100 | -3.31035400 | 0.62911400  |
| C  | -0.88794500 | -4.03471500 | 0.17033600  |
| C  | -0.20860800 | -4.85101500 | 1.08312700  |
| H  | 0.66582600  | -5.41237500 | 0.74629700  |
| C  | -0.62585100 | -4.95675600 | 2.40381700  |
| H  | -0.08185200 | -5.59595600 | 3.10076100  |
| C  | -1.73986500 | -4.24172200 | 2.83846900  |
| H  | -2.05475000 | -4.32735700 | 3.87900400  |
| C  | -2.44458200 | -3.40564700 | 1.96999900  |
| C  | -0.39711900 | -3.94400800 | -1.26475500 |
| H  | -1.13231800 | -3.36655500 | -1.84098500 |
| C  | -0.27225200 | -5.32565900 | -1.91411800 |
| H  | 0.51212000  | -5.92802600 | -1.43101300 |
| H  | -0.00195600 | -5.22041700 | -2.97494100 |
| H  | -1.21296000 | -5.89281500 | -1.85254500 |
| C  | 0.93330300  | -3.18456100 | -1.34319000 |
| H  | 0.88162500  | -2.21084500 | -0.83122800 |
| H  | 1.19995200  | -2.99786200 | -2.39491800 |
| H  | 1.73687000  | -3.77592100 | -0.87400600 |
| C  | -3.64854500 | -2.61327500 | 2.46495900  |
| H  | -3.69553500 | -1.69068400 | 1.86524700  |

|   |             |             |             |
|---|-------------|-------------|-------------|
| C | -4.96761400 | -3.36212500 | 2.23184100  |
| H | -4.93547200 | -4.35625500 | 2.70435000  |
| H | -5.18533700 | -3.49277600 | 1.16387400  |
| H | -5.80562200 | -2.80131200 | 2.67285100  |
| C | -3.53487400 | -2.21623800 | 3.93863400  |
| H | -2.56336800 | -1.75321600 | 4.16611500  |
| H | -3.66135800 | -3.08587900 | 4.60095700  |
| H | -4.32954500 | -1.50010800 | 4.19650000  |
| C | -3.78760300 | 1.65023700  | -0.75849700 |
| C | -3.63789500 | 2.53007300  | -1.84988000 |
| C | -3.78510100 | 3.90181000  | -1.61151600 |
| H | -3.67630800 | 4.59946000  | -2.44451900 |
| C | -4.04529900 | 4.39281200  | -0.33798600 |
| H | -4.15390700 | 5.46655800  | -0.17664700 |
| C | -4.14417700 | 3.51302000  | 0.73706600  |
| H | -4.31834700 | 3.90683000  | 1.73918000  |
| C | -4.01338100 | 2.13533300  | 0.54942100  |
| C | -3.26695500 | 2.05403800  | -3.24612000 |
| H | -3.32881700 | 0.95627400  | -3.26815600 |
| C | -4.19456700 | 2.62039700  | -4.32669200 |
| H | -4.06631100 | 3.70815100  | -4.43215700 |
| H | -5.25645500 | 2.43345800  | -4.10969900 |
| H | -3.95825900 | 2.16752200  | -5.30030700 |
| C | -1.81177400 | 2.42254400  | -3.55830600 |
| H | -1.68814000 | 3.51721100  | -3.58756700 |
| H | -1.51440400 | 2.01102400  | -4.53435300 |
| H | -1.12605600 | 2.01322700  | -2.80468600 |
| C | -4.12731300 | 1.16649600  | 1.71509100  |
| H | -3.41132400 | 0.35604300  | 1.51630100  |
| C | -5.51787700 | 0.52514800  | 1.79110000  |
| H | -6.29394500 | 1.29960000  | 1.89200000  |
| H | -5.58307900 | -0.13956000 | 2.66651700  |
| H | -5.74122100 | -0.07863200 | 0.89985200  |
| C | -3.74358300 | 1.78085200  | 3.05963700  |
| H | -2.78270900 | 2.31139500  | 3.00016300  |
| H | -3.64871500 | 0.98865700  | 3.81727800  |
| H | -4.50767200 | 2.48828700  | 3.41691900  |
| C | 3.72575200  | -0.77838800 | -0.62706800 |
| C | 4.93378700  | -1.43180400 | -1.18953200 |
| C | 6.15877900  | -0.76590000 | -1.07132100 |
| H | 6.18005500  | 0.18379800  | -0.52910900 |
| C | 7.30103800  | -1.34747500 | -1.61663000 |
| H | 8.26144900  | -0.83779100 | -1.52817200 |
| C | 7.22113800  | -2.57926300 | -2.26959700 |
| H | 8.11935000  | -3.02859900 | -2.69596700 |
| C | 5.99710900  | -3.23912800 | -2.37627900 |
| H | 5.93539800  | -4.20114900 | -2.88655300 |
| C | 4.84678300  | -2.66603100 | -1.83534100 |
| H | 3.87888900  | -3.16335800 | -1.92649400 |
| C | 3.15476100  | 0.87013500  | -2.50419700 |
| C | 4.16228600  | 2.01060600  | -2.32414600 |
| H | 3.80243300  | 2.71144200  | -1.55748400 |
| H | 4.27732000  | 2.55463100  | -3.27411300 |
| H | 5.14309200  | 1.62416100  | -2.01541100 |
| C | 3.58721600  | -0.07071100 | -3.63232100 |
| H | 4.63230400  | -0.39245400 | -3.53383600 |
| H | 3.48653700  | 0.46035500  | -4.58972800 |
| H | 2.93938700  | -0.95984100 | -3.66258300 |
| C | 1.77424800  | 1.44527200  | -2.83000700 |
| H | 1.44645000  | 2.10758400  | -2.01466400 |
| H | 1.03738200  | 0.64040800  | -2.95799200 |
| H | 1.82205500  | 2.04292100  | -3.75239600 |
| C | 3.71575700  | -1.77828300 | 1.71667200  |
| C | 5.22303100  | -1.61833500 | 1.95302600  |
| H | 5.48598600  | -0.55337900 | 1.87940600  |
| H | 5.81191800  | -2.18711300 | 1.22057200  |
| H | 5.47470200  | -1.99998400 | 2.95391800  |
| C | 2.95161800  | -1.27898200 | 2.94121300  |
| H | 3.24105600  | -1.84906100 | 3.83478600  |

|   |             |             |             |
|---|-------------|-------------|-------------|
| H | 1.86952900  | -1.39983500 | 2.78627200  |
| H | 3.17679300  | -0.21578500 | 3.11603900  |
| C | 3.35592200  | -3.24556500 | 1.46666400  |
| H | 3.68912800  | -3.86055800 | 2.31619000  |
| H | 3.85172100  | -3.62090900 | 0.55906300  |
| H | 2.26773800  | -3.35853100 | 1.35289100  |
| C | -0.65023400 | 0.14732500  | 0.76580900  |
| H | -0.80432900 | 1.23999000  | 0.85151000  |
| C | -0.80114300 | -0.46084600 | 2.16350800  |
| H | -0.38775300 | -1.48390800 | 2.12696000  |
| H | -1.86960100 | -0.58317400 | 2.40108700  |
| C | -0.14755600 | 0.35173100  | 3.27678000  |
| H | 0.90160800  | 0.58767400  | 3.05379700  |
| H | -0.65096000 | 1.32069100  | 3.40135800  |
| H | -0.17925300 | -0.19145700 | 4.23395600  |
| C | 0.62152600  | 4.16546000  | 1.67769500  |
| C | 0.90024300  | 4.34726300  | 0.14663800  |
| B | 2.03970500  | 2.51723300  | 0.98988200  |
| O | 0.99825100  | 2.80552600  | 1.89424900  |
| O | 1.98553600  | 3.44637200  | -0.08251800 |
| H | 3.27895100  | 2.71839700  | 1.60571100  |
| C | 4.56263800  | 2.53349900  | 1.26718200  |
| O | 4.71225600  | 1.33811700  | 0.85613700  |
| H | 4.59733300  | 3.36205700  | 0.51734600  |
| C | 5.17250100  | 2.95204200  | 2.60502500  |
| H | 6.26668700  | 2.97400100  | 2.46182300  |
| H | 4.85884900  | 3.98251300  | 2.83851300  |
| C | 4.80567400  | 2.00419600  | 3.73581300  |
| H | 5.14990900  | 0.98544800  | 3.51123200  |
| H | 5.24942700  | 2.31624500  | 4.69153800  |
| H | 3.71044300  | 1.97283800  | 3.86224800  |
| C | 1.33027800  | 5.75267400  | -0.24983800 |
| H | 0.54833600  | 6.48543900  | 0.00145700  |
| H | 2.26302300  | 6.03909800  | 0.25086500  |
| H | 1.50138000  | 5.78851800  | -1.33473300 |
| C | 1.52224000  | 5.04568600  | 2.54480800  |
| H | 1.23920800  | 6.10597400  | 2.48477800  |
| H | 1.43436600  | 4.71346600  | 3.58876000  |
| H | 2.57441500  | 4.94376100  | 2.24052100  |
| C | -0.83484400 | 4.33629800  | 2.07658400  |
| H | -0.93993100 | 4.18396100  | 3.16104200  |
| H | -1.19422400 | 5.34794300  | 1.83198900  |
| H | -1.47138300 | 3.60758700  | 1.55692200  |
| C | -0.27550300 | 3.90465600  | -0.72124700 |
| H | -1.14360400 | 4.57034600  | -0.61224800 |
| H | 0.03924300  | 3.91210000  | -1.77369700 |
| H | -0.59304200 | 2.87977200  | -0.46960000 |

Cartesian coordinates of the optimized geometry of EtCHO at PBE-D3BJ/def2-SVP level of theory:

|   |             |             |             |
|---|-------------|-------------|-------------|
| O | -1.84821200 | -0.00558600 | -0.26610200 |
| C | -0.78451600 | -0.27328000 | 0.25252200  |
| H | -0.65965900 | -1.21976400 | 0.87188800  |
| C | 0.47083800  | 0.56846100  | 0.16649500  |
| H | 0.60115700  | 1.03459600  | 1.17124200  |
| H | 0.28694600  | 1.39021000  | -0.55476700 |
| C | 1.71738200  | -0.25379100 | -0.17834600 |
| H | 1.64438800  | -0.69004300 | -1.19503200 |
| H | 2.63013600  | 0.37226200  | -0.14481600 |
| H | 1.86050100  | -1.09091100 | 0.53627300  |

Cartesian coordinates of the optimized geometry of HBPIn at PBE-D3BJ/def2-SVP level of theory:

|   |             |             |             |
|---|-------------|-------------|-------------|
| C | 0.79055800  | -0.18889000 | 0.04922000  |
| C | -0.79055900 | -0.18888700 | -0.04922200 |

|   |             |             |             |
|---|-------------|-------------|-------------|
| O | -1.08590800 | 1.20158000  | -0.38327600 |
| O | 1.08591200  | 1.20157800  | 0.38327500  |
| B | 0.00000200  | 1.94673200  | 0.00000000  |
| H | 0.00000400  | 3.15620900  | -0.00000200 |
| C | -1.47893700 | -0.47284800 | 1.29073100  |
| H | -2.55714200 | -0.23983000 | 1.19476900  |
| H | -1.37568300 | -1.53463300 | 1.58804900  |
| H | -1.06403300 | 0.16140200  | 2.09827400  |
| C | -1.36502300 | -1.08691400 | -1.14054400 |
| H | -1.09172000 | -2.14615100 | -0.96136300 |
| H | -2.47014200 | -1.01324500 | -1.14097200 |
| H | -1.00490700 | -0.79318100 | -2.14324900 |
| C | 1.36501700  | -1.08691600 | 1.14054600  |
| H | 1.09171400  | -2.14615300 | 0.96136500  |
| H | 2.47013600  | -1.01324900 | 1.14097700  |
| H | 1.00489700  | -0.79318100 | 2.14324800  |
| C | 1.47894000  | -0.47285200 | -1.29073100 |
| H | 2.55714500  | -0.23983700 | -1.19476500 |
| H | 1.37568400  | -1.53463700 | -1.58804900 |
| H | 1.06403900  | 0.16139900  | -2.09827500 |

Cartesian coordinates of the optimized geometry of **S1** at PBE-D3BJ/def2-SVP level of theory:

|    |             |             |             |
|----|-------------|-------------|-------------|
| Ga | 0.89565600  | 0.20082600  | -0.80654400 |
| Cl | 0.74555500  | -0.18154700 | -3.04508600 |
| Si | -0.68440600 | -1.06685200 | 0.48890000  |
| N  | 2.84184300  | -0.22310300 | -0.50765400 |
| N  | 1.19686800  | 2.17135100  | -0.80436800 |
| C  | 3.75488800  | 0.57034800  | -1.08318200 |
| C  | 3.44213300  | 1.82747700  | -1.66262200 |
| H  | 4.25810300  | 2.30743700  | -2.21848700 |
| C  | 2.29339300  | 2.61097400  | -1.46546600 |
| C  | 5.20470200  | 0.14817200  | -1.15040800 |
| H  | 5.41676600  | -0.26524100 | -2.15820400 |
| H  | 5.44815700  | -0.63365900 | -0.40916900 |
| H  | 5.87235300  | 1.01767800  | -1.00357900 |
| C  | 2.27966600  | 4.00341700  | -2.05281700 |
| H  | 3.29648700  | 4.34231600  | -2.32061400 |
| H  | 1.81417500  | 4.74211800  | -1.37432700 |
| H  | 1.66368800  | 3.98851900  | -2.97740300 |
| C  | 3.21976700  | -1.44211700 | 0.15690000  |
| C  | 3.46747400  | -2.62228600 | -0.59660000 |
| C  | 3.78238700  | -3.80487500 | 0.10217900  |
| H  | 3.97482100  | -4.72667700 | -0.46801800 |
| C  | 3.84566200  | -3.82955500 | 1.49778500  |
| H  | 4.08373800  | -4.76590000 | 2.02523500  |
| C  | 3.60295900  | -2.65699300 | 2.22441300  |
| H  | 3.65012500  | -2.68299500 | 3.32164200  |
| C  | 3.29201300  | -1.44716400 | 1.57940900  |
| C  | 3.39840600  | -2.66494600 | -2.11917700 |
| H  | 3.12970400  | -1.65294100 | -2.48188800 |
| C  | 4.74489600  | -3.06865200 | -2.74649900 |
| H  | 5.01601700  | -4.11158600 | -2.48074300 |
| H  | 5.57620900  | -2.41791500 | -2.41192400 |
| H  | 4.68848400  | -3.01337200 | -3.85300600 |
| C  | 2.28532400  | -3.61444000 | -2.58895000 |
| H  | 1.32418400  | -3.36263500 | -2.10782800 |
| H  | 2.52363300  | -4.67029200 | -2.34277100 |
| H  | 2.14573700  | -3.54202000 | -3.68654800 |
| C  | 3.08929300  | -0.16907100 | 2.38406900  |
| H  | 2.29430800  | 0.40496600  | 1.86379000  |
| C  | 4.37176500  | 0.68485700  | 2.38622200  |
| H  | 5.21814400  | 0.11727800  | 2.82576700  |
| H  | 4.22963900  | 1.60229600  | 2.99320800  |
| H  | 4.66831800  | 1.00289800  | 1.36872400  |
| C  | 2.59891100  | -0.41704600 | 3.81480200  |
| H  | 3.37692200  | -0.89509400 | 4.44614900  |

|   |             |             |             |
|---|-------------|-------------|-------------|
| H | 1.69139100  | -1.04978300 | 3.79629200  |
| H | 2.34113000  | 0.54696900  | 4.29643800  |
| C | 0.26413300  | 3.12071200  | -0.27176100 |
| C | -0.92545300 | 3.43904400  | -0.97725100 |
| C | -1.83441800 | 4.34074300  | -0.38943700 |
| H | -2.76517900 | 4.58839600  | -0.92326200 |
| C | -1.56461500 | 4.94406300  | 0.84319100  |
| H | -2.28322500 | 5.65278700  | 1.28210900  |
| C | -0.37277500 | 4.64504300  | 1.51459300  |
| H | -0.16463600 | 5.12217900  | 2.48350500  |
| C | 0.55358400  | 3.72695500  | 0.98706400  |
| C | -1.22191300 | 2.86271900  | -2.35455500 |
| H | -0.34926300 | 2.25529800  | -2.66702600 |
| C | -1.42080400 | 3.96881500  | -3.40469600 |
| H | -2.32885900 | 4.57378500  | -3.20084000 |
| H | -1.53613000 | 3.52502600  | -4.41457100 |
| H | -0.55813000 | 4.66459000  | -3.43249700 |
| C | -2.42975200 | 1.91696700  | -2.31135900 |
| H | -2.24628900 | 1.06573600  | -1.62766700 |
| H | -2.63571000 | 1.49571000  | -3.31546900 |
| H | -3.34173200 | 2.45003200  | -1.96782900 |
| C | 1.83508700  | 3.40468700  | 1.75117900  |
| H | 2.18636400  | 2.42050500  | 1.38061300  |
| C | 2.94797300  | 4.42930300  | 1.46064700  |
| H | 3.86581600  | 4.17279200  | 2.02850700  |
| H | 2.63258000  | 5.44964500  | 1.76404200  |
| H | 3.21835500  | 4.46185900  | 0.38911600  |
| C | 1.61635100  | 3.28451600  | 3.26657600  |
| H | 2.55268700  | 2.95623600  | 3.76023100  |
| H | 0.82703900  | 2.54907500  | 3.51052900  |
| H | 1.33696800  | 4.25573900  | 3.72432200  |
| N | -2.29503500 | -0.37360800 | 1.12597200  |
| N | -2.26538300 | -1.49723400 | -0.73564700 |
| C | -3.06652800 | -0.90514700 | 0.14268200  |
| C | -4.55689000 | -0.87427500 | 0.11232200  |
| C | -5.28848000 | -1.70833000 | 0.98301800  |
| H | -4.75004200 | -2.37778800 | 1.66945700  |
| C | -6.68963500 | -1.70512500 | 0.95309000  |
| H | -7.25104100 | -2.36588400 | 1.63067100  |
| C | -7.37393900 | -0.86395300 | 0.06069200  |
| H | -8.47418800 | -0.85905900 | 0.04062500  |
| C | -6.64976800 | -0.03138300 | -0.80717700 |
| H | -7.18025400 | 0.63121900  | -1.50750000 |
| C | -5.24762800 | -0.03881200 | -0.78727100 |
| H | -4.68007100 | 0.62057000  | -1.45746400 |
| C | -2.58074000 | -2.41159900 | -1.84917600 |
| C | -1.29113400 | -3.19623000 | -2.13673000 |
| H | -0.98023700 | -3.79002500 | -1.25533200 |
| H | -0.47724700 | -2.49620800 | -2.40339500 |
| H | -1.44523100 | -3.88521100 | -2.99068900 |
| C | -3.70075100 | -3.40923500 | -1.49340100 |
| H | -3.48132400 | -3.91722000 | -0.53226700 |
| H | -3.76482600 | -4.18439900 | -2.28321600 |
| H | -4.69255200 | -2.92662100 | -1.41696200 |
| C | -2.95718400 | -1.60856700 | -3.11014200 |
| H | -3.87949500 | -1.01706100 | -2.95029900 |
| H | -3.13755100 | -2.29893200 | -3.95908300 |
| H | -2.13058500 | -0.92565200 | -3.38572700 |
| C | -2.64150100 | 0.47040500  | 2.29042000  |
| C | -3.03098900 | -0.42884800 | 3.48065800  |
| H | -2.21029200 | -1.14241300 | 3.69015400  |
| H | -3.95836400 | -0.99658100 | 3.27165300  |
| H | -3.20503300 | 0.18498000  | 4.38762300  |
| C | -3.76495300 | 1.47236500  | 1.96493400  |
| H | -3.86737400 | 2.18479900  | 2.80769400  |
| H | -4.74597600 | 0.98538800  | 1.81631500  |
| H | -3.51429900 | 2.05693400  | 1.05670300  |
| C | -1.37838000 | 1.26531300  | 2.65830900  |
| H | -0.54824200 | 0.58127900  | 2.91766900  |

|   |             |             |            |
|---|-------------|-------------|------------|
| H | -1.58865500 | 1.92114900  | 3.52594500 |
| H | -1.06751800 | 1.91015600  | 1.81502700 |
| O | 0.18451900  | -1.33919600 | 2.01721800 |
| C | -0.01715100 | -2.59918200 | 1.27265300 |
| H | 0.94634500  | -3.04339800 | 0.93780500 |
| C | -0.88396200 | -3.61913100 | 1.99054500 |
| H | -1.03874700 | -4.48411500 | 1.30702800 |
| H | -1.89379600 | -3.19490700 | 2.18836200 |
| C | -0.25572900 | -4.08924000 | 3.30668600 |
| H | -0.09832200 | -3.22570400 | 3.98444600 |
| H | -0.89177400 | -4.83111900 | 3.83185300 |
| H | 0.73736300  | -4.55172700 | 3.12706000 |

Cartesian coordinates of the optimized geometry of **S2** at PBE-D3BJ/def2-SVP level of theory:

|    |             |             |             |
|----|-------------|-------------|-------------|
| Ga | 1.40554200  | -0.25211200 | -0.44459600 |
| Cl | 0.48966500  | -1.47219400 | -2.10879600 |
| Si | -2.12870600 | -1.12455000 | 1.88897600  |
| O  | -0.84791300 | -0.26400100 | 1.09869800  |
| N  | 1.50534200  | 1.55692000  | -1.26895000 |
| N  | 3.34476400  | -0.63436700 | -0.66996000 |
| N  | -3.19946100 | -1.73731900 | 0.37296200  |
| N  | -3.54847400 | 0.09955400  | 1.45825500  |
| C  | 2.35356800  | 1.72419200  | -2.30090700 |
| C  | 3.40551100  | 0.82632000  | -2.60375400 |
| H  | 3.96327100  | 1.04627800  | -3.52282800 |
| C  | 3.92985400  | -0.21645000 | -1.80732200 |
| C  | 2.18461000  | 2.92387000  | -3.20347700 |
| H  | 1.30823600  | 2.77202000  | -3.86676200 |
| H  | 3.07703500  | 3.07886900  | -3.83548600 |
| H  | 1.98134300  | 3.84444900  | -2.62388300 |
| C  | 5.18896600  | -0.90250700 | -2.28177700 |
| H  | 5.85840100  | -1.16734700 | -1.44213900 |
| H  | 5.74025900  | -0.28397800 | -3.01260600 |
| H  | 4.90930100  | -1.85694100 | -2.77688300 |
| C  | 0.56399000  | 2.58638000  | -0.92050000 |
| C  | -0.68802300 | 2.67098700  | -1.58625300 |
| C  | -1.57860800 | 3.69374500  | -1.20536500 |
| H  | -2.55076800 | 3.77254400  | -1.71571500 |
| C  | -1.25670600 | 4.60220700  | -0.19364800 |
| H  | -1.96991400 | 5.39056200  | 0.09109000  |
| C  | -0.02671000 | 4.49531400  | 0.46679100  |
| H  | 0.21581100  | 5.20500900  | 1.27014300  |
| C  | 0.90213700  | 3.49544100  | 0.12400600  |
| C  | -1.11520800 | 1.67830800  | -2.65915900 |
| H  | -0.25419200 | 1.01855100  | -2.88391500 |
| C  | -1.54345100 | 2.36839600  | -3.96484100 |
| H  | -2.46326300 | 2.97439800  | -3.82786700 |
| H  | -1.76163300 | 1.61125900  | -4.74527700 |
| H  | -0.75823800 | 3.04652200  | -4.35712800 |
| C  | -2.23492400 | 0.77088400  | -2.12410800 |
| H  | -1.93110500 | 0.25500000  | -1.19344800 |
| H  | -2.49767500 | -0.00212400 | -2.87436200 |
| H  | -3.14755100 | 1.36492600  | -1.90611200 |
| C  | 2.24279800  | 3.40490700  | 0.84728300  |
| H  | 2.50089700  | 2.32671200  | 0.89626700  |
| C  | 3.37424600  | 4.09864400  | 0.06574300  |
| H  | 3.13766700  | 5.16970000  | -0.10292100 |
| H  | 3.55301700  | 3.62563900  | -0.91787800 |
| H  | 4.32555900  | 4.04628500  | 0.63473900  |
| C  | 2.19258900  | 3.93492400  | 2.28672400  |
| H  | 1.35127100  | 3.49687800  | 2.85951900  |
| H  | 2.08740700  | 5.03907200  | 2.31719900  |
| H  | 3.13179500  | 3.68428800  | 2.81792800  |
| C  | 4.04138700  | -1.46704900 | 0.26897000  |
| C  | 3.91928400  | -2.88108700 | 0.21595400  |
| C  | 4.59166200  | -3.64662800 | 1.18874900  |

|   |             |             |             |
|---|-------------|-------------|-------------|
| H | 4.50386100  | -4.74368000 | 1.15916500  |
| C | 5.36456100  | -3.04294500 | 2.18496200  |
| H | 5.88245500  | -3.66021800 | 2.93468700  |
| C | 5.47230000  | -1.64731300 | 2.22843800  |
| H | 6.07738000  | -1.17680900 | 3.01725800  |
| C | 4.81606600  | -0.83521500 | 1.28588600  |
| C | 3.08507700  | -3.58504000 | -0.84556900 |
| H | 2.70341500  | -2.81687800 | -1.54660200 |
| C | 3.91638200  | -4.59063200 | -1.65963900 |
| H | 4.27628000  | -5.43281700 | -1.03257900 |
| H | 4.80727100  | -4.11221600 | -2.11485900 |
| H | 3.30479600  | -5.02386700 | -2.47715900 |
| C | 1.85405200  | -4.26196000 | -0.21933800 |
| H | 2.14849300  | -5.07408900 | 0.47789400  |
| H | 1.20679600  | -4.69826200 | -1.00639000 |
| H | 1.23962900  | -3.53445400 | 0.34592300  |
| C | 4.96158100  | 0.68257100  | 1.34116300  |
| H | 4.07246900  | 1.10528400  | 0.82927700  |
| C | 6.20032100  | 1.16424000  | 0.56273400  |
| H | 7.12685400  | 0.72643600  | 0.98938700  |
| H | 6.28823900  | 2.26901800  | 0.61548000  |
| H | 6.15411500  | 0.88476200  | -0.50627500 |
| C | 4.98911600  | 1.23546900  | 2.77315800  |
| H | 4.12003400  | 0.88907400  | 3.36699100  |
| H | 4.97209800  | 2.34375500  | 2.75423200  |
| H | 5.91049900  | 0.93856000  | 3.31482200  |
| C | -4.10693300 | -0.76628400 | 0.59222500  |
| C | -5.51388200 | -0.72440500 | 0.09384700  |
| C | -6.57185000 | -1.09401500 | 0.95004200  |
| H | -6.34529300 | -1.43055600 | 1.97266500  |
| C | -7.89818200 | -1.04940300 | 0.49684800  |
| H | -8.71591400 | -1.34614900 | 1.17104300  |
| C | -8.18164000 | -0.62868500 | -0.81253800 |
| H | -9.22304200 | -0.58998200 | -1.16625900 |
| C | -7.13250500 | -0.25918500 | -1.66923600 |
| H | -7.34899500 | 0.07250500  | -2.69598900 |
| C | -5.80425500 | -0.31013000 | -1.22183400 |
| H | -4.98055900 | -0.01362800 | -1.88641000 |
| C | -3.32615500 | -3.06136000 | -0.26003700 |
| C | -4.41548100 | -3.91142800 | 0.42368600  |
| H | -4.21814300 | -3.98268200 | 1.51253500  |
| H | -4.42427900 | -4.93826500 | 0.00441200  |
| H | -5.42356500 | -3.47680600 | 0.27691700  |
| C | -3.61325700 | -2.91998700 | -1.76720000 |
| H | -4.60725500 | -2.47191600 | -1.95576200 |
| H | -3.59602900 | -3.91895800 | -2.24782900 |
| H | -2.83571900 | -2.29209200 | -2.24415200 |
| C | -1.95385200 | -3.73827400 | -0.08653600 |
| H | -1.70325200 | -3.84478200 | 0.98962400  |
| H | -1.16299000 | -3.13728200 | -0.57750200 |
| H | -1.96070300 | -4.74901500 | -0.54040300 |
| C | -3.97859700 | 1.39988300  | 1.98932900  |
| C | -4.93736900 | 1.20398400  | 3.18231400  |
| H | -4.47289600 | 0.54436900  | 3.94237700  |
| H | -5.89128300 | 0.74557700  | 2.85569600  |
| H | -5.17193100 | 2.17759300  | 3.65925500  |
| C | -2.69867100 | 2.11260800  | 2.46866200  |
| H | -2.94654900 | 3.11079400  | 2.88080000  |
| H | -1.98126500 | 2.23423200  | 1.63468500  |
| H | -2.19892100 | 1.52667100  | 3.26702000  |
| C | -4.64913100 | 2.26035200  | 0.90309700  |
| H | -4.85146600 | 3.27325000  | 1.30543300  |
| H | -5.61128200 | 1.83157500  | 0.56542900  |
| H | -3.97867600 | 2.36586200  | 0.02803300  |
| C | 0.53777200  | -0.51994100 | 1.33181200  |
| H | 0.70448700  | -1.59047000 | 1.61358200  |
| C | 1.10574200  | 0.36645100  | 2.44385400  |
| H | 0.82152600  | 1.41481200  | 2.21822900  |
| H | 2.21535000  | 0.32263800  | 2.39689500  |

|   |             |             |            |
|---|-------------|-------------|------------|
| C | 0.64877200  | -0.00115900 | 3.85718600 |
| H | -0.45768700 | 0.01413500  | 3.94414100 |
| H | 0.97757300  | -1.02530600 | 4.12988500 |
| H | 1.05928500  | 0.70269200  | 4.61079100 |

Cartesian coordinates of the optimized geometry of Int-3 at PBE-D3BJ/def2-SVP level of theory:

|    |             |             |             |
|----|-------------|-------------|-------------|
| Ga | 2.06786600  | -0.20320200 | -0.50846300 |
| Cl | 1.02637000  | 0.03143000  | -2.50411200 |
| Si | -1.86747900 | 0.20927300  | 0.63356900  |
| O  | -0.20861500 | 0.42752200  | 1.05555300  |
| N  | 3.39451200  | 1.28221400  | -0.62253000 |
| N  | 3.39464300  | -1.64925200 | -0.84889300 |
| N  | -2.71265700 | 1.17335600  | -0.76760900 |
| N  | -2.18679000 | 2.14797300  | 1.11115400  |
| C  | 4.49699200  | 1.12181700  | -1.38019400 |
| C  | 4.89313300  | -0.10685100 | -1.95843600 |
| H  | 5.76011100  | -0.05175900 | -2.62867100 |
| C  | 4.43440300  | -1.40891600 | -1.66524300 |
| C  | 5.39782400  | 2.31033400  | -1.62888700 |
| H  | 6.36040000  | 1.98995400  | -2.06516800 |
| H  | 5.59035200  | 2.86855500  | -0.69207500 |
| H  | 4.91990800  | 3.02800700  | -2.32436200 |
| C  | 5.15189000  | -2.57129100 | -2.30993700 |
| H  | 5.25028400  | -3.43088200 | -1.62072300 |
| H  | 6.15102400  | -2.27847300 | -2.67957300 |
| H  | 4.55305700  | -2.92559400 | -3.17553200 |
| C  | 3.13225100  | 2.56419600  | -0.02994700 |
| C  | 2.60546300  | 3.62933300  | -0.81182100 |
| C  | 2.46119200  | 4.89048200  | -0.20190000 |
| H  | 2.06469200  | 5.72850300  | -0.79532300 |
| C  | 2.79387000  | 5.09564500  | 1.14032200  |
| H  | 2.67457000  | 6.09128500  | 1.59392000  |
| C  | 3.24962600  | 4.02134900  | 1.91370100  |
| H  | 3.47957400  | 4.17883000  | 2.97723400  |
| C  | 3.42317400  | 2.74372800  | 1.35144400  |
| C  | 2.14074700  | 3.44222500  | -2.25234600 |
| H  | 2.43983100  | 2.42861300  | -2.58526200 |
| C  | 2.74509500  | 4.47330300  | -3.22012000 |
| H  | 2.39012200  | 5.50150500  | -2.99994900 |
| H  | 2.44913400  | 4.24037700  | -4.26304800 |
| H  | 3.85304900  | 4.49352200  | -3.17896100 |
| C  | 0.60366100  | 3.48875100  | -2.31893300 |
| H  | 0.14637600  | 2.72564400  | -1.66094400 |
| H  | 0.25333400  | 3.29195100  | -3.35247600 |
| H  | 0.23302400  | 4.48981300  | -2.01246900 |
| C  | 3.94941900  | 1.58787300  | 2.19337700  |
| H  | 3.52028900  | 0.65972600  | 1.75997400  |
| C  | 5.48058900  | 1.46412400  | 2.09091400  |
| H  | 5.97364800  | 2.39627500  | 2.43669600  |
| H  | 5.80997500  | 1.26606500  | 1.05264400  |
| H  | 5.84895300  | 0.62964400  | 2.72236300  |
| C  | 3.49952200  | 1.65364300  | 3.65872000  |
| H  | 2.40444400  | 1.80392600  | 3.74038900  |
| H  | 4.00042300  | 2.47540800  | 4.21112200  |
| H  | 3.75609600  | 0.70896300  | 4.17880200  |
| C  | 3.16329000  | -2.95772600 | -0.30867800 |
| C  | 2.29168300  | -3.86863800 | -0.95988700 |
| C  | 2.06067200  | -5.11827400 | -0.35102900 |
| H  | 1.38388100  | -5.83488900 | -0.84147300 |
| C  | 2.67052300  | -5.46271300 | 0.85871000  |
| H  | 2.47478200  | -6.44396400 | 1.31702000  |
| C  | 3.52462500  | -4.55054200 | 1.49262200  |
| H  | 3.99136400  | -4.82372500 | 2.45010000  |
| C  | 3.78229300  | -3.28584900 | 0.93428100  |
| C  | 1.61213300  | -3.53933900 | -2.28323500 |
| H  | 1.95141500  | -2.53343100 | -2.60082300 |



|   |             |             |             |
|---|-------------|-------------|-------------|
| C | 2.00046400  | -4.54166300 | -3.38448500 |
| H | 1.62278900  | -5.56123700 | -3.16090700 |
| H | 3.10004100  | -4.61633700 | -3.50614200 |
| H | 1.56732100  | -4.23339500 | -4.35792900 |
| C | 0.08458700  | -3.46567800 | -2.12611000 |
| H | -0.33550300 | -4.44541200 | -1.81958600 |
| H | -0.39025000 | -3.17392100 | -3.08474600 |
| H | -0.21475100 | -2.71371200 | -1.36998300 |
| C | 4.70500900  | -2.29416800 | 1.64051900  |
| H | 4.36558900  | -1.27997100 | 1.34201500  |
| C | 6.16577100  | -2.43551300 | 1.17246400  |
| H | 6.54779600  | -3.45593500 | 1.38405000  |
| H | 6.81539200  | -1.71002200 | 1.70411200  |
| H | 6.27752500  | -2.24776400 | 0.08866900  |
| C | 4.63542700  | -2.37923900 | 3.17216400  |
| H | 3.59352100  | -2.32547700 | 3.54336600  |
| H | 5.20376100  | -1.54165400 | 3.62521200  |
| H | 5.08757100  | -3.31703200 | 3.55576600  |
| C | -2.79928200 | 2.32452300  | -0.05837600 |
| C | -3.53405900 | 3.55697800  | -0.47409000 |
| C | -4.84781600 | 3.75342700  | -0.00043900 |
| H | -5.30534000 | 2.99230500  | 0.64888100  |
| C | -5.55771300 | 4.91305900  | -0.34113800 |
| H | -6.58264500 | 5.05495700  | 0.03353800  |
| C | -4.96066000 | 5.89255400  | -1.15099400 |
| H | -5.51627500 | 6.80530600  | -1.41409600 |
| C | -3.65284300 | 5.70245000  | -1.62421300 |
| H | -3.17930900 | 6.46490700  | -2.26099800 |
| C | -2.94313600 | 4.53896200  | -1.29262300 |
| H | -1.92468200 | 4.38400700  | -1.67337200 |
| C | -3.39459000 | 0.78661600  | -2.02876100 |
| C | -4.92020700 | 0.69811500  | -1.81931200 |
| H | -5.15618300 | -0.03920400 | -1.02657000 |
| H | -5.41147800 | 0.36035300  | -2.75494700 |
| H | -5.35297300 | 1.68091600  | -1.54951900 |
| C | -3.05577900 | 1.78018900  | -3.15790100 |
| H | -3.50438600 | 2.77670700  | -2.99366900 |
| H | -3.44735000 | 1.39163000  | -4.11934600 |
| H | -1.95707200 | 1.88904100  | -3.25151700 |
| C | -2.86809300 | -0.59765900 | -2.45024700 |
| H | -3.14315400 | -1.37030700 | -1.71011000 |
| H | -1.76656300 | -0.58777000 | -2.56311600 |
| H | -3.32303000 | -0.86972400 | -3.42388700 |
| C | -1.63194400 | 3.17818600  | 2.02084300  |
| C | -2.70303500 | 4.17201400  | 2.51410300  |
| H | -3.57163400 | 3.63474500  | 2.94613100  |
| H | -3.07035600 | 4.83587800  | 1.71015600  |
| H | -2.27019700 | 4.81359100  | 3.30806800  |
| C | -1.01666400 | 2.47339400  | 3.24487800  |
| H | -0.49575800 | 3.22319900  | 3.87268400  |
| H | -0.28851900 | 1.71038800  | 2.91367200  |
| H | -1.78787300 | 1.98536100  | 3.86800900  |
| C | -0.49989900 | 3.92668900  | 1.29227400  |
| H | -0.01081300 | 4.65226200  | 1.97170200  |
| H | -0.88041100 | 4.48718200  | 0.41726800  |
| H | 0.26788000  | 3.20883200  | 0.94616200  |
| C | 0.72677600  | -0.63938500 | 0.91671400  |
| H | 0.21148700  | -1.51392000 | 0.44460700  |
| C | 1.24828800  | -1.11221600 | 2.27363900  |
| H | 1.87982200  | -0.33108500 | 2.74533700  |
| H | 1.91108400  | -1.98100900 | 2.08130500  |
| C | 0.13734100  | -1.52247500 | 3.24467700  |
| H | -0.46322300 | -0.64614800 | 3.55835500  |
| H | -0.56356100 | -2.24792500 | 2.78339400  |
| H | 0.55860600  | -1.98365800 | 4.16131500  |
| C | -3.28475800 | -0.47801700 | 1.79680500  |
| O | -3.11532700 | -1.91007800 | 1.90384300  |
| H | -4.20049000 | -0.27893300 | 1.18908700  |
| C | -3.53653600 | 0.07537800  | 3.19588500  |

|   |             |             |             |
|---|-------------|-------------|-------------|
| H | -2.64223300 | -0.10170000 | 3.83039300  |
| H | -3.64810700 | 1.17436300  | 3.10282400  |
| C | -4.77241700 | -0.52580400 | 3.86980800  |
| H | -4.94539200 | -0.08583100 | 4.87314700  |
| H | -5.68498100 | -0.35118800 | 3.26063600  |
| H | -4.66009000 | -1.62124000 | 3.99454600  |
| H | -1.64554200 | -1.09969800 | -0.11005400 |
| C | -4.31556500 | -4.64034400 | -0.05564200 |
| C | -5.36428600 | -3.50115800 | -0.38661900 |
| O | -4.67532300 | -2.31136900 | 0.08332300  |
| O | -3.63904700 | -4.11267900 | 1.11404200  |
| C | -5.68796300 | -3.33813900 | -1.86840100 |
| H | -6.13931200 | -4.26596800 | -2.27377700 |
| H | -6.41623800 | -2.51439300 | -2.00553700 |
| H | -4.78691400 | -3.09384800 | -2.45920000 |
| C | -6.65400000 | -3.62414600 | 0.43391000  |
| H | -6.42889800 | -3.76832500 | 1.50910700  |
| H | -7.23564100 | -2.68757500 | 0.32803600  |
| H | -7.28423600 | -4.46738200 | 0.08966600  |
| C | -3.25816300 | -4.80418600 | -1.15367100 |
| H | -2.43843500 | -5.43776300 | -0.76278500 |
| H | -3.67195700 | -5.28482500 | -2.06172600 |
| H | -2.82120500 | -3.82682600 | -1.43699300 |
| C | -4.93204400 | -5.99014600 | 0.29852600  |
| H | -5.53486500 | -6.38191500 | -0.54539700 |
| H | -4.12839000 | -6.72128000 | 0.51446000  |
| H | -5.57594400 | -5.92038300 | 1.19431200  |
| B | -3.77574900 | -2.73714700 | 1.05794200  |

Cartesian coordinates of the optimized geometry of TS-2 at PBE-D3BJ/def2-SVP level of theory:

|    |             |             |             |
|----|-------------|-------------|-------------|
| Ga | 0.94977700  | -0.02928700 | -0.72242900 |
| Cl | 0.85355600  | -0.80284800 | -2.85759100 |
| Si | -1.03305700 | -0.40130300 | 0.52064100  |
| N  | 2.96853600  | -0.20184400 | -0.46374200 |
| N  | 1.09291300  | 1.98093800  | -1.05778100 |
| C  | 3.77390900  | 0.57602100  | -1.21684500 |
| C  | 3.35255200  | 1.73866600  | -1.89635500 |
| H  | 4.11611400  | 2.22562600  | -2.51566100 |
| C  | 2.15665000  | 2.46525600  | -1.72241000 |
| C  | 5.23875500  | 0.21908200  | -1.34543800 |
| H  | 5.35863900  | -0.71485100 | -1.92889100 |
| H  | 5.69958200  | 0.02712000  | -0.35742100 |
| H  | 5.79712900  | 1.02477300  | -1.85404400 |
| C  | 2.13434200  | 3.87913200  | -2.26117500 |
| H  | 2.40222300  | 4.60150400  | -1.46313300 |
| H  | 1.13140500  | 4.16693800  | -2.62703200 |
| H  | 2.87220500  | 3.99193000  | -3.07710800 |
| C  | 3.59179400  | -1.23806100 | 0.31733800  |
| C  | 3.89962900  | -2.50182500 | -0.25545800 |
| C  | 4.53985900  | -3.46437700 | 0.55077400  |
| H  | 4.78011900  | -4.44741700 | 0.11739900  |
| C  | 4.87577000  | -3.19755900 | 1.88035100  |
| H  | 5.37999600  | -3.96266000 | 2.49006600  |
| C  | 4.55710400  | -1.95261600 | 2.43603100  |
| H  | 4.80970600  | -1.75023400 | 3.48658700  |
| C  | 3.90884900  | -0.95995100 | 1.67943600  |
| C  | 3.54309900  | -2.86975700 | -1.69059600 |
| H  | 3.12005000  | -1.97163600 | -2.18214600 |
| C  | 4.75836800  | -3.34107500 | -2.50761900 |
| H  | 5.17611800  | -4.29015400 | -2.11207900 |
| H  | 5.58053900  | -2.59715600 | -2.51124300 |
| H  | 4.46378100  | -3.52381500 | -3.56109300 |
| C  | 2.44474800  | -3.94534500 | -1.70529600 |
| H  | 1.58586700  | -3.63795900 | -1.08257400 |
| H  | 2.82281500  | -4.91171700 | -1.31034100 |
| H  | 2.07348400  | -4.11335300 | -2.73638700 |

|   |             |             |             |
|---|-------------|-------------|-------------|
| C | 3.55538500  | 0.38124700  | 2.31789900  |
| H | 2.67712600  | 0.77504400  | 1.76466400  |
| C | 4.68641000  | 1.41255400  | 2.14996400  |
| H | 5.62502300  | 1.05063900  | 2.61902000  |
| H | 4.41311200  | 2.37294900  | 2.63436100  |
| H | 4.89563600  | 1.62609300  | 1.08420800  |
| C | 3.15131000  | 0.24295900  | 3.79247700  |
| H | 4.00443400  | -0.06497400 | 4.43104100  |
| H | 2.33793700  | -0.49886600 | 3.91901600  |
| H | 2.78899300  | 1.21249600  | 4.18519200  |
| C | 0.06276200  | 2.90049400  | -0.68086500 |
| C | -1.17407400 | 2.93206200  | -1.38832100 |
| C | -2.11376900 | 3.92162400  | -1.03993800 |
| H | -3.06650400 | 3.97268600  | -1.58535100 |
| C | -1.85933400 | 4.85056300  | -0.02344300 |
| H | -2.60745900 | 5.61948000  | 0.22216500  |
| C | -0.66138200 | 4.77794100  | 0.69304400  |
| H | -0.47737900 | 5.48337500  | 1.51764100  |
| C | 0.30989100  | 3.80516400  | 0.39009200  |
| C | -1.46896100 | 1.95076700  | -2.51671300 |
| H | -1.02143000 | 0.98006800  | -2.21826100 |
| C | -0.79632700 | 2.35187700  | -3.84073800 |
| H | -1.13659700 | 3.35477100  | -4.17450400 |
| H | -1.04791400 | 1.61734400  | -4.63212400 |
| H | 0.30548800  | 2.36089600  | -3.75261800 |
| C | -2.96810200 | 1.70848200  | -2.72600200 |
| H | -3.46626100 | 1.44461900  | -1.77107000 |
| H | -3.12053000 | 0.87468300  | -3.43882900 |
| H | -3.48353900 | 2.59579300  | -3.14909500 |
| C | 1.55402500  | 3.70112100  | 1.26569800  |
| H | 2.26694300  | 3.01249200  | 0.77019500  |
| C | 2.27106500  | 5.04595800  | 1.46336900  |
| H | 3.22037000  | 4.89782100  | 2.01752400  |
| H | 1.65734500  | 5.76021300  | 2.05020900  |
| H | 2.51458700  | 5.53187900  | 0.49693500  |
| C | 1.17808000  | 3.07537800  | 2.62069400  |
| H | 2.06409400  | 3.02145600  | 3.28440400  |
| H | 0.77426700  | 2.05125500  | 2.49842300  |
| H | 0.40586400  | 3.68212000  | 3.13702800  |
| N | -2.83655600 | 0.14719800  | 0.99443300  |
| N | -2.30939500 | -1.68974600 | -0.07313800 |
| C | -3.33812300 | -0.94007400 | 0.40986300  |
| C | -4.78799200 | -1.27539600 | 0.32304200  |
| C | -5.34533800 | -2.21348900 | 1.21652800  |
| H | -4.69616300 | -2.70714200 | 1.95437400  |
| C | -6.71146500 | -2.51844700 | 1.15643300  |
| H | -7.13786400 | -3.25074400 | 1.85838800  |
| C | -7.53251800 | -1.89635500 | 0.20146600  |
| H | -8.60428100 | -2.14081400 | 0.15234400  |
| C | -6.98249300 | -0.96079500 | -0.68882700 |
| H | -7.62047000 | -0.46989700 | -1.43900700 |
| C | -5.61733100 | -0.64473400 | -0.62562200 |
| H | -5.18594500 | 0.09249000  | -1.31802300 |
| C | -2.39553200 | -2.69420800 | -1.17316400 |
| C | -1.03955500 | -3.39801500 | -1.27539900 |
| H | -0.82528900 | -3.99040100 | -0.36758600 |
| H | -0.22694700 | -2.66936200 | -1.43694300 |
| H | -1.04323400 | -4.08336600 | -2.14535300 |
| C | -3.46521500 | -3.76920000 | -0.89425700 |
| H | -3.34887100 | -4.18938300 | 0.12440500  |
| H | -3.32934900 | -4.59514500 | -1.62043300 |
| H | -4.49812900 | -3.39487000 | -1.00718600 |
| C | -2.70044300 | -1.98067800 | -2.50435500 |
| H | -3.66664200 | -1.44159900 | -2.45642800 |
| H | -2.76531100 | -2.72103900 | -3.32712100 |
| H | -1.89191200 | -1.26714600 | -2.75639200 |
| C | -3.41406100 | 1.07056800  | 1.99187600  |
| C | -3.94350100 | 0.28174700  | 3.20535200  |
| H | -3.15188900 | -0.39036400 | 3.59268200  |

|   |             |             |            |
|---|-------------|-------------|------------|
| H | -4.83443700 | -0.32200800 | 2.94718700 |
| H | -4.23263200 | 0.98256500  | 4.01419200 |
| C | -4.52616300 | 1.93621100  | 1.37122500 |
| H | -4.87441900 | 2.68510000  | 2.11083700 |
| H | -5.39967500 | 1.32969500  | 1.06556300 |
| H | -4.13912700 | 2.48180200  | 0.48794700 |
| C | -2.25858100 | 1.97429800  | 2.44986300 |
| H | -1.47010500 | 1.37120600  | 2.93943100 |
| H | -2.62776400 | 2.73158500  | 3.16888600 |
| H | -1.81239000 | 2.50637900  | 1.58894000 |
| O | -0.42137600 | -0.64832700 | 2.08636600 |
| C | 0.55765300  | -1.52039200 | 1.43656700 |
| H | 1.57319700  | -1.17480800 | 1.70513200 |
| C | 0.39362600  | -2.97490400 | 1.82606400 |
| H | 1.05469300  | -3.59158600 | 1.17899900 |
| H | -0.64844900 | -3.30030100 | 1.61862000 |
| C | 0.72734600  | -3.23301000 | 3.30305700 |
| H | 0.55863600  | -4.29284900 | 3.58830500 |
| H | 1.78983100  | -2.99160800 | 3.51490200 |
| H | 0.09701400  | -2.59576800 | 3.95631500 |

Cartesian coordinates of the optimized geometry of TS-7 at PBE-D3BJ/def2-SVP level of theory:

|    |             |             |             |
|----|-------------|-------------|-------------|
| Ga | 2.33140400  | -0.24044400 | -0.50638000 |
| Cl | 1.42700400  | 0.31625900  | -2.49488600 |
| Si | -1.59573600 | 0.69641600  | 0.50970700  |
| O  | 0.08065600  | 0.74785000  | 0.88114400  |
| N  | 3.90207800  | 0.97543400  | -0.36965600 |
| N  | 3.40740300  | -1.85040400 | -1.00380300 |
| N  | -2.21416300 | 1.58902400  | -1.01115000 |
| N  | -1.62400000 | 2.70539600  | 0.76842500  |
| C  | 4.94879300  | 0.77862200  | -1.18956800 |
| C  | 5.17726500  | -0.43198100 | -1.88309500 |
| H  | 6.05297800  | -0.43571000 | -2.54437700 |
| C  | 4.53030700  | -1.67773600 | -1.72801000 |
| C  | 5.94017300  | 1.89621800  | -1.41675900 |
| H  | 6.93932200  | 1.50043500  | -1.67480200 |
| H  | 6.02172300  | 2.56594500  | -0.54116700 |
| H  | 5.59268900  | 2.51703800  | -2.26916200 |
| C  | 5.14914500  | -2.86950700 | -2.42105200 |
| H  | 5.18522700  | -3.75522400 | -1.75822100 |
| H  | 6.16901900  | -2.63964000 | -2.77696300 |
| H  | 4.53118500  | -3.15913100 | -3.29548000 |
| C  | 3.80434100  | 2.14490600  | 0.45974000  |
| C  | 3.22981500  | 3.33977800  | -0.04857500 |
| C  | 3.08676400  | 4.43440300  | 0.82665400  |
| H  | 2.63579400  | 5.36537300  | 0.45004600  |
| C  | 3.49967300  | 4.35855100  | 2.15988600  |
| H  | 3.36992300  | 5.22251900  | 2.82904700  |
| C  | 4.07842400  | 3.17770800  | 2.64312500  |
| H  | 4.40529300  | 3.12755600  | 3.69144000  |
| C  | 4.24491100  | 2.05465900  | 1.81256300  |
| C  | 2.76689400  | 3.46830800  | -1.49377800 |
| H  | 2.99323100  | 2.51576900  | -2.01098700 |
| C  | 3.49621000  | 4.60424200  | -2.23180200 |
| H  | 3.24590300  | 5.59560800  | -1.79988100 |
| H  | 3.19868300  | 4.62409200  | -3.30018000 |
| H  | 4.59786300  | 4.49304900  | -2.18398700 |
| C  | 1.24471600  | 3.65865400  | -1.57319300 |
| H  | 0.70642600  | 2.88642900  | -0.99123000 |
| H  | 0.90278700  | 3.58950600  | -2.62567700 |
| H  | 0.95401800  | 4.65555000  | -1.18151800 |
| C  | 4.91544500  | 0.78734000  | 2.33584300  |
| H  | 4.44180900  | -0.06332700 | 1.80274600  |
| C  | 6.41567100  | 0.75307300  | 1.98668700  |
| H  | 6.94194000  | 1.62240700  | 2.43257300  |
| H  | 6.59195100  | 0.77079100  | 0.89555700  |

|   |             |             |             |
|---|-------------|-------------|-------------|
| H | 6.88473700  | -0.17072200 | 2.38405800  |
| C | 4.72538800  | 0.56327700  | 3.84177700  |
| H | 3.66169100  | 0.62969400  | 4.14218600  |
| H | 5.29723100  | 1.29971300  | 4.44319500  |
| H | 5.09922000  | -0.44101300 | 4.12619500  |
| C | 2.92820700  | -3.17666900 | -0.73254600 |
| C | 2.11052900  | -3.86522700 | -1.67076200 |
| C | 1.70265300  | -5.17791700 | -1.36064100 |
| H | 1.07437700  | -5.72537100 | -2.07973000 |
| C | 2.07525300  | -5.79566600 | -0.16292300 |
| H | 1.75287600  | -6.82587900 | 0.05211600  |
| C | 2.85329000  | -5.09418600 | 0.76624800  |
| H | 3.13334700  | -5.57837100 | 1.71294000  |
| C | 3.29136800  | -3.78303600 | 0.50517200  |
| C | 1.64293900  | -3.23318100 | -2.97642000 |
| H | 2.15336000  | -2.25594800 | -3.08768100 |
| C | 1.98092200  | -4.09744800 | -4.20292200 |
| H | 1.41663600  | -5.05294100 | -4.20274100 |
| H | 3.05925900  | -4.35190800 | -4.24985100 |
| H | 1.71590400  | -3.55968800 | -5.13559100 |
| C | 0.13502200  | -2.93493400 | -2.92179400 |
| H | -0.45844100 | -3.86488300 | -2.79429200 |
| H | -0.19984300 | -2.43846700 | -3.85428400 |
| H | -0.10457800 | -2.24848200 | -2.08802200 |
| C | 4.17106700  | -3.04922200 | 1.51087300  |
| H | 3.99283500  | -1.96526100 | 1.35162900  |
| C | 5.66890400  | -3.29019100 | 1.24756200  |
| H | 5.91207000  | -4.37098700 | 1.31422700  |
| H | 6.28568800  | -2.75419500 | 1.99830100  |
| H | 5.97673000  | -2.93039300 | 0.24758200  |
| C | 3.82077500  | -3.37405100 | 2.96973700  |
| H | 2.73488800  | -3.27272300 | 3.16623100  |
| H | 4.35611100  | -2.68524600 | 3.65359800  |
| H | 4.12116300  | -4.40500400 | 3.24830600  |
| C | -2.21273800 | 2.81411400  | -0.41503400 |
| C | -2.87283900 | 4.04364500  | -0.94871700 |
| C | -4.18949300 | 4.33657300  | -0.53758500 |
| H | -4.71898600 | 3.63102600  | 0.11969300  |
| C | -4.82456200 | 5.50680700  | -0.97771000 |
| H | -5.85333600 | 5.72324100  | -0.65270000 |
| C | -4.15206500 | 6.39497300  | -1.83204100 |
| H | -4.65034600 | 7.31382400  | -2.17627500 |
| C | -2.84278400 | 6.10507400  | -2.24762800 |
| H | -2.31000000 | 6.79678400  | -2.91748200 |
| C | -2.20497800 | 4.93536200  | -1.81035900 |
| H | -1.17584500 | 4.71570900  | -2.12376800 |
| C | -2.81597500 | 1.19339500  | -2.31182300 |
| C | -4.34163300 | 1.41698800  | -2.30493100 |
| H | -4.78122700 | 0.91864400  | -1.41811700 |
| H | -4.78777800 | 0.96857000  | -3.21573500 |
| H | -4.60646600 | 2.49098300  | -2.29734900 |
| C | -2.13536100 | 1.96343600  | -3.46077100 |
| H | -2.35134900 | 3.04697700  | -3.42113800 |
| H | -2.50890700 | 1.58556300  | -4.43366200 |
| H | -1.03830900 | 1.80979500  | -3.42379400 |
| C | -2.55522400 | -0.30600700 | -2.51931400 |
| H | -3.14992100 | -0.90947900 | -1.80821400 |
| H | -1.47712200 | -0.53230200 | -2.42021500 |
| H | -2.87471000 | -0.58693100 | -3.54245700 |
| C | -1.39338000 | 3.69492300  | 1.83761500  |
| C | -2.66038800 | 3.86311400  | 2.70474100  |
| H | -2.96860300 | 2.90199400  | 3.15896900  |
| H | -3.50506900 | 4.25454400  | 2.10535100  |
| H | -2.46495100 | 4.58108300  | 3.52691700  |
| C | -0.24864300 | 3.15164900  | 2.71400100  |
| H | -0.04978500 | 3.85314100  | 3.54851500  |
| H | 0.67619600  | 3.02446300  | 2.12129700  |
| H | -0.50904300 | 2.16488800  | 3.14162500  |
| C | -0.96820700 | 5.07431500  | 1.29667000  |

|   |             |             |             |
|---|-------------|-------------|-------------|
| H | -0.64391700 | 5.71038200  | 2.14449800  |
| H | -1.79032700 | 5.60003400  | 0.77807100  |
| H | -0.11515600 | 4.97315000  | 0.59982500  |
| C | 0.97410700  | -0.35356600 | 0.97041700  |
| H | 0.43196700  | -1.30518700 | 0.76788200  |
| C | 1.57517200  | -0.40798700 | 2.37699200  |
| H | 2.00607300  | 0.59010100  | 2.59901900  |
| H | 2.42472200  | -1.11960200 | 2.38149800  |
| C | 0.58244400  | -0.79862000 | 3.47236700  |
| H | -0.28832300 | -0.11553800 | 3.48794200  |
| H | 0.19050300  | -1.82604300 | 3.31772700  |
| H | 1.05207900  | -0.76802700 | 4.47677700  |
| C | -3.24146200 | 0.46188100  | 1.54897800  |
| O | -4.11622100 | -0.28223300 | 0.71973500  |
| H | -3.66564500 | 1.49213500  | 1.56534900  |
| C | -3.11879300 | 0.02117000  | 3.01311100  |
| H | -2.69634100 | -1.00221500 | 3.07155000  |
| H | -2.36560400 | 0.68845700  | 3.49015100  |
| C | -4.43763000 | 0.09338800  | 3.78870800  |
| H | -4.29275800 | -0.18499600 | 4.85287800  |
| H | -4.85622300 | 1.12252000  | 3.76290500  |
| H | -5.18589600 | -0.59446000 | 3.34904400  |
| H | -1.50756900 | -0.82145600 | 0.03230100  |
| C | -6.07779700 | -2.74206600 | -0.52239100 |
| C | -6.22950600 | -3.13075800 | 1.00580600  |
| O | -5.46313900 | -2.10922500 | 1.65403200  |
| O | -4.75288700 | -2.19795300 | -0.56690600 |
| C | -7.66285600 | -3.08168900 | 1.53557800  |
| H | -8.32029300 | -3.78137200 | 0.98007400  |
| H | -7.67687300 | -3.37386500 | 2.60479200  |
| H | -8.08121900 | -2.06126900 | 1.45894000  |
| C | -5.60837900 | -4.50252800 | 1.32388000  |
| H | -4.59545500 | -4.59190000 | 0.88665800  |
| H | -5.51382500 | -4.59964500 | 2.42334500  |
| H | -6.22861100 | -5.34086000 | 0.94815300  |
| C | -7.05726000 | -1.63248300 | -0.93921200 |
| H | -6.74722300 | -1.24229800 | -1.92883300 |
| H | -8.10183200 | -1.99563500 | -1.01560900 |
| H | -7.02054600 | -0.79322900 | -0.21759300 |
| C | -6.17093900 | -3.91676800 | -1.49532600 |
| H | -7.15600400 | -4.42113200 | -1.42217600 |
| H | -6.04985100 | -3.55175700 | -2.53508700 |
| H | -5.37646500 | -4.66229000 | -1.30412400 |
| B | -4.45281400 | -1.66666300 | 0.73903900  |
| C | -2.15400200 | -2.62325900 | 0.33977300  |
| H | -2.42887800 | -2.49040200 | -0.72858600 |
| O | -3.03404100 | -2.43959700 | 1.22014800  |
| C | -0.95634300 | -3.45726500 | 0.68396000  |
| H | -0.12540800 | -3.26391900 | -0.02019300 |
| H | -0.62064800 | -3.20960100 | 1.71008600  |
| C | -1.37025800 | -4.93996400 | 0.60634700  |
| H | -0.50366200 | -5.58420700 | 0.84712200  |
| H | -2.19005600 | -5.15702800 | 1.31883700  |
| H | -1.71914500 | -5.20816200 | -0.41181600 |

Cartesian coordinates of the optimized geometry of TS-10 at PBE-D3BJ/def2-SVP level of theory:

|    |             |             |             |
|----|-------------|-------------|-------------|
| Ga | -1.90449800 | -0.64883400 | -0.57442900 |
| Cl | -1.19992500 | -0.81540500 | -2.70282200 |
| Si | 2.19007500  | 0.61868400  | 0.35518800  |
| O  | 0.68659700  | -0.14999000 | 0.32087900  |
| N  | -2.55333400 | -2.49324600 | -0.20690100 |
| N  | -3.72617200 | 0.11796500  | -0.87066100 |
| N  | 3.02570100  | 0.19508000  | -1.24899200 |
| N  | 3.31488500  | -0.85082000 | 0.63092900  |
| C  | -3.63045800 | -2.93482700 | -0.88579500 |
| C  | -4.58027300 | -2.07627300 | -1.47699400 |

|   |             |             |             |
|---|-------------|-------------|-------------|
| H | -5.41012600 | -2.57533100 | -1.99371100 |
| C | -4.69297600 | -0.66917500 | -1.37056600 |
| C | -3.83509200 | -4.42287600 | -1.04860000 |
| H | -3.16167000 | -4.78937400 | -1.85226100 |
| H | -4.87499900 | -4.66103200 | -1.33554000 |
| H | -3.56733100 | -4.98340300 | -0.13364000 |
| C | -5.98069500 | -0.05295300 | -1.86710800 |
| H | -6.21922400 | 0.88985100  | -1.34120300 |
| H | -6.82348600 | -0.75971400 | -1.75808700 |
| H | -5.88439100 | 0.19163800  | -2.94514700 |
| C | -1.79798500 | -3.38571700 | 0.62712600  |
| C | -0.66496700 | -4.07087700 | 0.11518800  |
| C | 0.07181700  | -4.88836900 | 0.99520300  |
| H | 0.95314500  | -5.42632700 | 0.61350800  |
| C | -0.29677600 | -5.03246800 | 2.33637600  |
| H | 0.29542500  | -5.67367000 | 3.00680600  |
| C | -1.42297400 | -4.35692500 | 2.82476200  |
| H | -1.70679500 | -4.47375400 | 3.88074300  |
| C | -2.19130700 | -3.52481100 | 1.99094500  |
| C | -0.23178800 | -3.94810900 | -1.33982000 |
| H | -0.98562500 | -3.33051700 | -1.86603100 |
| C | -0.17096200 | -5.31631200 | -2.03918100 |
| H | 0.61837100  | -5.96508700 | -1.60531700 |
| H | 0.06179200  | -5.18783300 | -3.11601200 |
| H | -1.13130100 | -5.86512500 | -1.95902400 |
| C | 1.10799500  | -3.20281000 | -1.46086900 |
| H | 1.07876200  | -2.22791700 | -0.93697800 |
| H | 1.34432300  | -3.00715800 | -2.52664400 |
| H | 1.93423500  | -3.80263000 | -1.02556600 |
| C | -3.41886900 | -2.79913000 | 2.53670800  |
| H | -3.54993900 | -1.88958800 | 1.91407900  |
| C | -4.70168100 | -3.63696900 | 2.37691100  |
| H | -4.61212700 | -4.60024600 | 2.92099300  |
| H | -4.92407000 | -3.86323700 | 1.31788100  |
| H | -5.57442100 | -3.09074900 | 2.79083800  |
| C | -3.26453400 | -2.35367200 | 3.99826200  |
| H | -2.32254100 | -1.79643800 | 4.16646800  |
| H | -3.27848100 | -3.21599700 | 4.69621200  |
| H | -4.10962800 | -1.69566200 | 4.28616000  |
| C | -3.91987500 | 1.53042800  | -0.70595000 |
| C | -3.79251700 | 2.41881400  | -1.80950300 |
| C | -3.96995900 | 3.79654200  | -1.57193200 |
| H | -3.87593400 | 4.49802400  | -2.41502200 |
| C | -4.25243500 | 4.29005300  | -0.29490500 |
| H | -4.38274700 | 5.37125600  | -0.13564800 |
| C | -4.36233500 | 3.40339300  | 0.78391700  |
| H | -4.58014500 | 3.79565900  | 1.78762900  |
| C | -4.20026200 | 2.01847700  | 0.60316200  |
| C | -3.47461200 | 1.94654700  | -3.22474500 |
| H | -3.43317400 | 0.83934700  | -3.21612600 |
| C | -4.55428100 | 2.38750300  | -4.22979000 |
| H | -4.56269000 | 3.48954000  | -4.36032000 |
| H | -5.57228400 | 2.08718800  | -3.91081300 |
| H | -4.35947500 | 1.94031400  | -5.22576500 |
| C | -2.08813800 | 2.43137200  | -3.68178700 |
| H | -2.03800900 | 3.53969600  | -3.71382000 |
| H | -1.86496600 | 2.04883200  | -4.69833800 |
| H | -1.29237400 | 2.06224100  | -3.00959600 |
| C | -4.37379800 | 1.05299700  | 1.76909100  |
| H | -3.73073400 | 0.17556500  | 1.54875600  |
| C | -5.81768200 | 0.52503000  | 1.85290200  |
| H | -6.53117300 | 1.35718500  | 2.02606800  |
| H | -5.92094400 | -0.19515300 | 2.69107000  |
| H | -6.12129600 | 0.00379300  | 0.92495400  |
| C | -3.92415300 | 1.62982000  | 3.11705200  |
| H | -2.90682300 | 2.06338300  | 3.05927500  |
| H | -3.90954100 | 0.83324500  | 3.88767300  |
| H | -4.61293300 | 2.42037800  | 3.47985700  |
| C | 3.80250100  | -0.70597000 | -0.61347900 |

|   |             |             |             |
|---|-------------|-------------|-------------|
| C | 5.03292000  | -1.34029200 | -1.15344600 |
| C | 6.25581000  | -0.65084000 | -1.01439100 |
| H | 6.24920100  | 0.31131300  | -0.47794400 |
| C | 7.42928100  | -1.21805500 | -1.53050300 |
| H | 8.38472200  | -0.68270200 | -1.42180800 |
| C | 7.39057200  | -2.46431900 | -2.17816600 |
| H | 8.31511300  | -2.90456600 | -2.58177600 |
| C | 6.17227800  | -3.14983400 | -2.30921400 |
| H | 6.13864800  | -4.12563300 | -2.81681000 |
| C | 4.99139800  | -2.59068000 | -1.79862800 |
| H | 4.03019900  | -3.11209100 | -1.91413800 |
| C | 3.16081300  | 0.86471100  | -2.55837300 |
| C | 4.17809000  | 2.01864600  | -2.45860600 |
| H | 3.84415800  | 2.76253900  | -1.71002100 |
| H | 4.26510300  | 2.52732200  | -3.44049000 |
| H | 5.17873700  | 1.64661500  | -2.16776200 |
| C | 3.57228000  | -0.13178400 | -3.65603800 |
| H | 4.61643500  | -0.47804100 | -3.54599700 |
| H | 3.48349900  | 0.36491000  | -4.64250500 |
| H | 2.90174200  | -1.01450400 | -3.65485500 |
| C | 1.76741600  | 1.42719000  | -2.88665600 |
| H | 1.45861800  | 2.14969500  | -2.10646900 |
| H | 1.01432900  | 0.61832200  | -2.94980000 |
| H | 1.79504000  | 1.96629600  | -3.85449400 |
| C | 3.78056700  | -1.66878000 | 1.76944300  |
| C | 5.26296100  | -1.40871300 | 2.10034600  |
| H | 5.44697700  | -0.31648200 | 2.10338200  |
| H | 5.93524400  | -1.87707300 | 1.35677500  |
| H | 5.50353500  | -1.84182000 | 3.09216600  |
| C | 2.90833200  | -1.25388600 | 2.96339400  |
| H | 3.19597300  | -1.82607900 | 3.86648000  |
| H | 1.83976700  | -1.45069600 | 2.75228500  |
| H | 3.04089100  | -0.17566600 | 3.18268300  |
| C | 3.54051700  | -3.16074300 | 1.47179200  |
| H | 3.84683900  | -3.77055800 | 2.34574900  |
| H | 4.13611600  | -3.49644900 | 0.60078400  |
| H | 2.46929400  | -3.35364200 | 1.26955900  |
| C | -0.63305000 | 0.19286900  | 0.74643000  |
| H | -0.77754900 | 1.29623300  | 0.71448100  |
| C | -0.88980200 | -0.30202700 | 2.17538500  |
| H | -0.56869000 | -1.36371300 | 2.22870900  |
| H | -1.98501000 | -0.31658000 | 2.34720200  |
| C | -0.23517200 | 0.51031200  | 3.29343300  |
| H | 0.85646500  | 0.61343700  | 3.15084100  |
| H | -0.63492600 | 1.54099800  | 3.33384200  |
| H | -0.40201200 | 0.02698200  | 4.27860500  |
| C | 0.52723500  | 4.29349300  | 1.55037700  |
| C | 0.77203400  | 4.43021800  | -0.00837000 |
| B | 2.00628000  | 2.66461100  | 0.89080500  |
| O | 0.96680000  | 2.94348300  | 1.81877600  |
| O | 1.87341700  | 3.52320400  | -0.24483800 |
| H | 3.24391400  | 2.88788200  | 1.41215200  |
| C | 4.62765900  | 2.69097600  | 1.26481800  |
| O | 4.80149300  | 1.47172300  | 0.93554000  |
| H | 4.73773800  | 3.49153100  | 0.47368000  |
| C | 5.03885400  | 3.19590900  | 2.65570300  |
| H | 6.15228000  | 3.24988700  | 2.65927400  |
| H | 4.67748900  | 4.24067300  | 2.77726300  |
| C | 4.54955000  | 2.31401400  | 3.80135000  |
| H | 4.93751500  | 1.28166500  | 3.69985000  |
| H | 4.87094700  | 2.70496000  | 4.78754100  |
| H | 3.44012900  | 2.25910200  | 3.80128100  |
| C | 1.19466300  | 5.82898000  | -0.45974400 |
| H | 0.41123500  | 6.57691000  | -0.22102000 |
| H | 2.14181800  | 6.14085000  | 0.01689100  |
| H | 1.34969900  | 5.83348500  | -1.55673200 |
| C | 1.40464300  | 5.24436100  | 2.37918300  |
| H | 1.07566700  | 6.29836000  | 2.29044600  |
| H | 1.34170000  | 4.94586600  | 3.44406700  |



|   |             |            |             |
|---|-------------|------------|-------------|
| H | 2.46670900  | 5.18030500 | 2.07199700  |
| C | -0.93331100 | 4.42570900 | 1.97641800  |
| H | -1.01656900 | 4.30056600 | 3.07458300  |
| H | -1.33208500 | 5.42701500 | 1.71571900  |
| H | -1.57327500 | 3.66534100 | 1.49300800  |
| C | -0.42100600 | 3.95991300 | -0.84588700 |
| H | -1.29080200 | 4.63855800 | -0.75630700 |
| H | -0.12284000 | 3.92367700 | -1.91055900 |
| H | -0.75147900 | 2.94420700 | -0.55482500 |

Cartesian coordinates of the optimized geometry of EtCHO at PBE0-D3BJ/6-31G\* level of theory:

|   |             |             |             |
|---|-------------|-------------|-------------|
| O | -1.81834700 | -0.02850200 | -0.28476000 |
| C | -0.77758400 | -0.24586100 | 0.28578300  |
| H | -0.67897100 | -1.11995500 | 0.97202500  |
| C | 0.47046600  | 0.58495900  | 0.15515100  |
| H | 0.63181900  | 1.08584800  | 1.12152700  |
| H | 0.29309000  | 1.35915800  | -0.59745500 |
| C | 1.68876300  | -0.27451000 | -0.17868000 |
| H | 1.58050500  | -0.74969200 | -1.15910900 |
| H | 2.59870600  | 0.33219100  | -0.19731500 |
| H | 1.83175400  | -1.06706700 | 0.56488400  |

Cartesian coordinates of the optimized geometry of HBPIn at PBE0-D3BJ/6-31G\* level of theory:

|   |             |             |             |
|---|-------------|-------------|-------------|
| C | 0.78037100  | -0.18603700 | 0.05230200  |
| C | -0.78037000 | -0.18604000 | -0.05229900 |
| O | -1.06999200 | 1.18633300  | -0.40510700 |
| O | 1.06998800  | 1.18633900  | 0.40510500  |
| B | -0.00000300 | 1.92912100  | -0.00000100 |
| H | -0.00000700 | 3.12117500  | -0.00000300 |
| C | -1.46994300 | -0.44671400 | 1.28239300  |
| H | -2.53626700 | -0.22602400 | 1.17780000  |
| H | -1.36045200 | -1.48963000 | 1.59620400  |
| H | -1.06594000 | 0.19915700  | 2.06845100  |
| C | -1.35011100 | -1.09636900 | -1.12449900 |
| H | -1.09015700 | -2.14138200 | -0.92271100 |
| H | -2.44110200 | -1.01304300 | -1.13447200 |
| H | -0.98104100 | -0.82847400 | -2.11690200 |
| C | 1.35012200  | -1.09636200 | 1.12450000  |
| H | 1.09017200  | -2.14137700 | 0.92271600  |
| H | 2.44111400  | -1.01303200 | 1.13446500  |
| H | 0.98105900  | -0.82846700 | 2.11690500  |
| C | 1.46993600  | -0.44671100 | -1.28239300 |
| H | 2.53626000  | -0.22601400 | -1.17780800 |
| H | 1.36045000  | -1.48962800 | -1.59620100 |
| H | 1.06592400  | 0.19915500  | -2.06845000 |

Cartesian coordinates of the optimized geometry of **S1** at PBE0-D3BJ/6-31G\* level of theory:

|    |             |             |             |
|----|-------------|-------------|-------------|
| Ga | 0.86048500  | 0.18920300  | -0.83083600 |
| Cl | 0.75975400  | -0.14425300 | -3.05545400 |
| Si | -0.68612100 | -1.08869500 | 0.42430800  |
| N  | 2.76438000  | -0.24855600 | -0.49722700 |
| N  | 1.19155100  | 2.12205900  | -0.81343000 |
| C  | 3.68850200  | 0.51146300  | -1.06596500 |
| C  | 3.41040400  | 1.75374800  | -1.66814700 |
| H  | 4.22402800  | 2.20202500  | -2.22587200 |
| C  | 2.27674700  | 2.53654900  | -1.48714700 |
| C  | 5.12864200  | 0.07646800  | -1.08957200 |
| H  | 5.33425300  | -0.44767600 | -2.03023200 |
| H  | 5.36553900  | -0.60618900 | -0.27224100 |
| H  | 5.78959100  | 0.94483500  | -1.04076800 |

|   |             |             |             |
|---|-------------|-------------|-------------|
| C | 2.28307900  | 3.92007400  | -2.07711600 |
| H | 3.28666200  | 4.21292000  | -2.39126900 |
| H | 1.89112000  | 4.66960000  | -1.38663900 |
| H | 1.62948600  | 3.92440000  | -2.95873000 |
| C | 3.13754400  | -1.45843900 | 0.17438700  |
| C | 3.40564300  | -2.61825100 | -0.57510500 |
| C | 3.72194800  | -3.79335400 | 0.11138700  |
| H | 3.92493600  | -4.69852300 | -0.45486400 |
| C | 3.76813500  | -3.82370600 | 1.49604000  |
| H | 4.00803700  | -4.74772700 | 2.01551100  |
| C | 3.50603600  | -2.66679700 | 2.21972900  |
| H | 3.53983600  | -2.70026200 | 3.30327600  |
| C | 3.19035600  | -1.46749000 | 1.58307800  |
| C | 3.31706400  | -2.65480200 | -2.08713600 |
| H | 3.13809300  | -1.64002600 | -2.45551000 |
| C | 4.59574000  | -3.18381300 | -2.73908600 |
| H | 4.77024200  | -4.23549100 | -2.48442500 |
| H | 5.48147400  | -2.62038200 | -2.42721200 |
| H | 4.51604000  | -3.11982300 | -3.83009000 |
| C | 2.11095200  | -3.49526800 | -2.50265100 |
| H | 1.22210200  | -3.16247800 | -1.96615000 |
| H | 2.26856100  | -4.55548700 | -2.26964100 |
| H | 1.91904200  | -3.40072500 | -3.57681700 |
| C | 2.98211100  | -0.20063200 | 2.38918300  |
| H | 2.18270000  | 0.36839600  | 1.90109500  |
| C | 4.26219000  | 0.64234000  | 2.38087700  |
| H | 5.10913600  | 0.05600800  | 2.75670200  |
| H | 4.15321300  | 1.52117000  | 3.02557700  |
| H | 4.51402600  | 0.99745800  | 1.37747000  |
| C | 2.52132700  | -0.45976200 | 3.81990100  |
| H | 3.30808600  | -0.91906600 | 4.43062500  |
| H | 1.63712700  | -1.10216300 | 3.81738200  |
| H | 2.25882300  | 0.48982200  | 4.29840100  |
| C | 0.30706300  | 3.10396100  | -0.27616700 |
| C | -0.87841200 | 3.43786100  | -0.95057800 |
| C | -1.74056600 | 4.37018500  | -0.36878800 |
| H | -2.66756200 | 4.62470800  | -0.87662400 |
| C | -1.41998000 | 4.99417900  | 0.82763300  |
| H | -2.09542500 | 5.72663700  | 1.26123900  |
| C | -0.22550700 | 4.68365400  | 1.46456200  |
| H | 0.02435600  | 5.18133300  | 2.39708000  |
| C | 0.64925300  | 3.73033600  | 0.94283000  |
| C | -1.22808800 | 2.82856000  | -2.28900200 |
| H | -0.38081900 | 2.22718100  | -2.62952600 |
| C | -1.49027400 | 3.89634500  | -3.35227000 |
| H | -2.38489300 | 4.48771900  | -3.12420400 |
| H | -1.64493400 | 3.42406900  | -4.32866600 |
| H | -0.64796800 | 4.59115100  | -3.43930400 |
| C | -2.42751100 | 1.89631100  | -2.15127300 |
| H | -2.21362900 | 1.08768600  | -1.44630800 |
| H | -2.67959400 | 1.44578200  | -3.11642400 |
| H | -3.30481600 | 2.44671500  | -1.78740000 |
| C | 1.93311300  | 3.40065600  | 1.68215400  |
| H | 2.29664900  | 2.44387700  | 1.29456600  |
| C | 3.02204400  | 4.44598800  | 1.41983800  |
| H | 3.93064700  | 4.19306200  | 1.97841000  |
| H | 2.69215500  | 5.44102600  | 1.74207300  |
| H | 3.28913200  | 4.50407900  | 0.36144300  |
| C | 1.71581400  | 3.25098600  | 3.18806700  |
| H | 2.64714600  | 2.94044700  | 3.67235600  |
| H | 0.95054100  | 2.50390100  | 3.41234700  |
| H | 1.41561100  | 4.19681000  | 3.65282900  |
| N | -2.23483200 | -0.36429900 | 1.09718100  |
| N | -2.28399900 | -1.48673300 | -0.73159400 |
| C | -3.04386800 | -0.87964200 | 0.15407000  |
| C | -4.52527300 | -0.82220400 | 0.17890700  |
| C | -5.21876900 | -1.63180900 | 1.08235200  |
| H | -4.66445200 | -2.29533400 | 1.73943300  |
| C | -6.60794900 | -1.60437100 | 1.11938000  |

|   |             |             |             |
|---|-------------|-------------|-------------|
| H | -7.14091400 | -2.24220500 | 1.81863300  |
| C | -7.31266300 | -0.76257300 | 0.26196500  |
| H | -8.39818200 | -0.73830300 | 0.29419600  |
| C | -6.62313700 | 0.04596000  | -0.63738600 |
| H | -7.16833000 | 0.70536700  | -1.30665100 |
| C | -5.23320000 | 0.01438900  | -0.68441900 |
| H | -4.69449700 | 0.65162200  | -1.37727800 |
| C | -2.65207400 | -2.35410100 | -1.85358800 |
| C | -1.39442600 | -3.14187500 | -2.20682800 |
| H | -1.04981100 | -3.73729000 | -1.35598900 |
| H | -0.60196200 | -2.45179400 | -2.50545800 |
| H | -1.59533300 | -3.81427100 | -3.04745700 |
| C | -3.77064800 | -3.33581200 | -1.49612100 |
| H | -3.52567400 | -3.87827500 | -0.57589900 |
| H | -3.87784100 | -4.06800800 | -2.30389700 |
| H | -4.73624200 | -2.84250300 | -1.36362400 |
| C | -3.03623100 | -1.50445100 | -3.06658000 |
| H | -3.94887300 | -0.93023300 | -2.88008000 |
| H | -3.21066300 | -2.14644200 | -3.93735300 |
| H | -2.21808300 | -0.81644400 | -3.29767400 |
| C | -2.50353300 | 0.47740800  | 2.26904700  |
| C | -2.77947000 | -0.41330900 | 3.48260100  |
| H | -1.94494900 | -1.10680800 | 3.62266200  |
| H | -3.70300400 | -0.98623700 | 3.35064500  |
| H | -2.88700000 | 0.19664100  | 4.38682700  |
| C | -3.65343900 | 1.45857400  | 2.03375200  |
| H | -3.69104600 | 2.16186600  | 2.87252700  |
| H | -4.62603300 | 0.96640600  | 1.96743900  |
| H | -3.48410100 | 2.03689300  | 1.11871700  |
| C | -1.23407100 | 1.29001800  | 2.51551700  |
| H | -0.38047300 | 0.63413600  | 2.70796700  |
| H | -1.37943000 | 1.94583900  | 3.38026700  |
| H | -1.01525400 | 1.91673700  | 1.64784700  |
| O | 0.19509700  | -1.39229700 | 1.89719400  |
| C | -0.00352200 | -2.62946400 | 1.13082900  |
| H | 0.95031300  | -3.04584100 | 0.78884100  |
| C | -0.84385700 | -3.65997300 | 1.84807000  |
| H | -1.01788400 | -4.50355900 | 1.16465700  |
| H | -1.83237700 | -3.24290200 | 2.08804900  |
| C | -0.16967700 | -4.14790900 | 3.12622500  |
| H | 0.00139600  | -3.30471300 | 3.80354700  |
| H | -0.77574100 | -4.89577200 | 3.65056900  |
| H | 0.80666000  | -4.59276200 | 2.90058900  |

Cartesian coordinates of the optimized geometry of **S2** at PBE0-D3BJ/6-31G\* level of theory:

|    |             |             |             |
|----|-------------|-------------|-------------|
| Ga | 1.38179600  | -0.29496300 | -0.51216900 |
| Cl | 0.62001500  | -1.43398700 | -2.27026300 |
| Si | -2.06180000 | -1.15627700 | 1.81246800  |
| O  | -0.78719900 | -0.28405400 | 1.09051700  |
| N  | 1.40744100  | 1.52754800  | -1.22458100 |
| N  | 3.31690600  | -0.54038300 | -0.68506500 |
| N  | -3.12792100 | -1.72003000 | 0.30983200  |
| N  | -3.44216700 | 0.06870500  | 1.44003400  |
| C  | 2.26090700  | 1.78504400  | -2.21722800 |
| C  | 3.35549900  | 0.97080500  | -2.54415800 |
| H  | 3.90784600  | 1.25259900  | -3.43228100 |
| C  | 3.90230100  | -0.06850800 | -1.78310400 |
| C  | 2.07463800  | 3.02965500  | -3.04183600 |
| H  | 1.21227000  | 2.91223100  | -3.70723600 |
| H  | 2.95754100  | 3.22641300  | -3.65238100 |
| H  | 1.87192300  | 3.90092800  | -2.41408400 |
| C  | 5.20284500  | -0.66341800 | -2.24461200 |
| H  | 5.82791800  | -0.98295300 | -1.40865100 |
| H  | 5.76219000  | 0.03315900  | -2.87231900 |
| H  | 4.98031600  | -1.55799900 | -2.84078100 |
| C  | 0.42105400  | 2.50815700  | -0.88468900 |

|   |             |             |             |
|---|-------------|-------------|-------------|
| C | -0.77830200 | 2.58792200  | -1.61405200 |
| C | -1.68934600 | 3.59221800  | -1.28109500 |
| H | -2.61810200 | 3.66991300  | -1.84003600 |
| C | -1.43275000 | 4.48832000  | -0.25437900 |
| H | -2.15516300 | 5.26281000  | -0.01142300 |
| C | -0.25502500 | 4.38012100  | 0.47246200  |
| H | -0.06585400 | 5.07372000  | 1.28571400  |
| C | 0.68674300  | 3.39319600  | 0.17862200  |
| C | -1.12397900 | 1.60218100  | -2.70905200 |
| H | -0.23071400 | 1.02131600  | -2.95445400 |
| C | -1.60475900 | 2.28248600  | -3.99203800 |
| H | -2.56846700 | 2.78566600  | -3.85075800 |
| H | -1.74017600 | 1.53471100  | -4.78110700 |
| H | -0.89267900 | 3.03270000  | -4.35405600 |
| C | -2.17658700 | 0.61689100  | -2.19993300 |
| H | -1.85556300 | 0.11914800  | -1.28172700 |
| H | -2.37206200 | -0.15153300 | -2.95588800 |
| H | -3.11599100 | 1.14474900  | -1.99005500 |
| C | 1.97515500  | 3.30344200  | 0.97297400  |
| H | 2.28815000  | 2.25428800  | 0.95179600  |
| C | 3.10108900  | 4.11705000  | 0.32803600  |
| H | 2.80583000  | 5.16638500  | 0.21071000  |
| H | 3.37139700  | 3.72309100  | -0.65592500 |
| H | 4.00100900  | 4.08737400  | 0.95373300  |
| C | 1.79339600  | 3.71038600  | 2.43465500  |
| H | 0.93410400  | 3.20574200  | 2.88886700  |
| H | 1.64518700  | 4.79130900  | 2.53977400  |
| H | 2.68594900  | 3.44976500  | 3.01150700  |
| C | 4.03469000  | -1.33684500 | 0.25674100  |
| C | 3.92779100  | -2.73792900 | 0.22721400  |
| C | 4.57304100  | -3.47509000 | 1.22224700  |
| H | 4.48924700  | -4.55883600 | 1.21509400  |
| C | 5.32430400  | -2.85098900 | 2.20678200  |
| H | 5.82345700  | -3.44110100 | 2.97049100  |
| C | 5.44134600  | -1.46685500 | 2.20865400  |
| H | 6.03880600  | -0.98324200 | 2.97640900  |
| C | 4.79624100  | -0.68463300 | 1.25034200  |
| C | 3.16509200  | -3.45884800 | -0.86364800 |
| H | 2.81464100  | -2.71819100 | -1.58693500 |
| C | 4.06695300  | -4.43930500 | -1.61753200 |
| H | 4.40488000  | -5.25889000 | -0.97253700 |
| H | 4.95860600  | -3.94052600 | -2.01334300 |
| H | 3.52149100  | -4.88225500 | -2.45822300 |
| C | 1.93106900  | -4.17313700 | -0.31263000 |
| H | 2.20959600  | -4.95427600 | 0.40511000  |
| H | 1.36660300  | -4.63926700 | -1.12714600 |
| H | 1.26075900  | -3.47251000 | 0.19208500  |
| C | 4.95148800  | 0.82520100  | 1.27780600  |
| H | 4.16769500  | 1.25178500  | 0.64303700  |
| C | 6.29953700  | 1.25650900  | 0.69131500  |
| H | 7.12829400  | 0.83734700  | 1.27424200  |
| H | 6.39142600  | 2.34881700  | 0.70860300  |
| H | 6.41839300  | 0.92735600  | -0.34471400 |
| C | 4.78723900  | 1.40774700  | 2.68171000  |
| H | 3.83764500  | 1.11009500  | 3.13596500  |
| H | 4.81789500  | 2.50197800  | 2.63720000  |
| H | 5.59554000  | 1.09187400  | 3.35061600  |
| C | -4.02481100 | -0.76850800 | 0.58158200  |
| C | -5.44485000 | -0.72064500 | 0.14954700  |
| C | -6.44954000 | -1.05932500 | 1.05968600  |
| H | -6.17541400 | -1.37464200 | 2.06251200  |
| C | -7.78613800 | -1.00777700 | 0.67775500  |
| H | -8.56091600 | -1.28019900 | 1.38884300  |
| C | -8.12841100 | -0.60780800 | -0.61141400 |
| H | -9.17258000 | -0.56241800 | -0.90776100 |
| C | -7.12983200 | -0.26793400 | -1.52059400 |
| H | -7.39228100 | 0.04480400  | -2.52728500 |
| C | -5.79190400 | -0.32855200 | -1.14502200 |
| H | -5.00985900 | -0.06382600 | -1.84973000 |

|   |             |             |             |
|---|-------------|-------------|-------------|
| C | -3.29631000 | -3.04722400 | -0.28714900 |
| C | -4.27738400 | -3.90283000 | 0.51895100  |
| H | -3.96248100 | -3.94905800 | 1.56714900  |
| H | -4.30792800 | -4.92378100 | 0.12120100  |
| H | -5.29182400 | -3.49354300 | 0.47632100  |
| C | -3.74570200 | -2.94415400 | -1.74567700 |
| H | -4.76088100 | -2.54849800 | -1.83212400 |
| H | -3.73353600 | -3.93939900 | -2.20363600 |
| H | -3.06199800 | -2.30000400 | -2.30670100 |
| C | -1.90438200 | -3.68158900 | -0.25159200 |
| H | -1.56578300 | -3.81129500 | 0.78357800  |
| H | -1.18477200 | -3.04697700 | -0.77902200 |
| H | -1.92094800 | -4.66641600 | -0.73006400 |
| C | -3.81955400 | 1.38116800  | 1.95744000  |
| C | -4.76834900 | 1.24123200  | 3.15174900  |
| H | -4.33596100 | 0.57056400  | 3.90173600  |
| H | -5.73741200 | 0.83904800  | 2.84047700  |
| H | -4.94037100 | 2.21817400  | 3.61811600  |
| C | -2.51394300 | 2.03908500  | 2.41361400  |
| H | -2.70600900 | 3.06211600  | 2.75375300  |
| H | -1.78458800 | 2.05955100  | 1.59971700  |
| H | -2.07307500 | 1.48093800  | 3.24822800  |
| C | -4.46007600 | 2.24481400  | 0.87073900  |
| H | -4.62201000 | 3.25647500  | 1.25892600  |
| H | -5.42700100 | 1.84923800  | 0.54906700  |
| H | -3.79669800 | 2.31526700  | 0.00412300  |
| C | 0.56098800  | -0.72593200 | 1.22373400  |
| H | 0.60000700  | -1.81590100 | 1.39134200  |
| C | 1.28936600  | -0.06739600 | 2.38534500  |
| H | 1.29956200  | 1.01805200  | 2.24154800  |
| H | 2.33529900  | -0.39835500 | 2.33028700  |
| C | 0.73583200  | -0.38876500 | 3.76686300  |
| H | -0.29485900 | -0.03694400 | 3.87763800  |
| H | 0.72924400  | -1.46958700 | 3.94731500  |
| H | 1.34023700  | 0.08417900  | 4.55025200  |

Cartesian coordinates of the optimized geometry of Int-3 at PBE0-D3BJ/6-31G\* level of theory:

|    |             |             |             |
|----|-------------|-------------|-------------|
| Ga | 2.02075300  | -0.22925000 | -0.52158700 |
| Cl | 1.07887200  | 0.02875600  | -2.52858400 |
| Si | -1.85218800 | 0.25534100  | 0.60074600  |
| O  | -0.22315600 | 0.42466800  | 1.02456000  |
| N  | 3.37966500  | 1.17948700  | -0.61340200 |
| N  | 3.28499200  | -1.69794900 | -0.83247900 |
| N  | -2.65359100 | 1.25015000  | -0.76304800 |
| N  | -2.12117200 | 2.16644900  | 1.11615900  |
| C  | 4.45711800  | 0.98966200  | -1.37666900 |
| C  | 4.81463200  | -0.23524800 | -1.95593700 |
| H  | 5.66296700  | -0.20864200 | -2.62861200 |
| C  | 4.31227300  | -1.50551700 | -1.65339300 |
| C  | 5.39703500  | 2.14004500  | -1.62044100 |
| H  | 6.34107400  | 1.78177500  | -2.03440100 |
| H  | 5.59806600  | 2.68905600  | -0.69649000 |
| H  | 4.96126800  | 2.85428400  | -2.32531100 |
| C  | 4.99231800  | -2.68905600 | -2.28342600 |
| H  | 5.04337800  | -3.54204800 | -1.60355900 |
| H  | 5.99854000  | -2.43516400 | -2.62264200 |
| H  | 4.40726300  | -3.00640000 | -3.15548300 |
| C  | 3.17595800  | 2.46283800  | -0.01725100 |
| C  | 2.70039700  | 3.54241800  | -0.78512900 |
| C  | 2.60384700  | 4.79234400  | -0.16957000 |
| H  | 2.24455600  | 5.63971600  | -0.74723800 |
| C  | 2.94429000  | 4.97082500  | 1.16301500  |
| H  | 2.86437400  | 5.95383600  | 1.61932800  |
| C  | 3.36233600  | 3.88364400  | 1.91961600  |
| H  | 3.60151500  | 4.02244800  | 2.96942200  |
| C  | 3.48122100  | 2.61698900  | 1.34932000  |

|   |             |             |             |
|---|-------------|-------------|-------------|
| C | 2.24567500  | 3.38472100  | -2.22312900 |
| H | 2.54943600  | 2.39702000  | -2.58289900 |
| C | 2.83960700  | 4.44118700  | -3.15786500 |
| H | 2.45783000  | 5.44316500  | -2.93019800 |
| H | 2.56728100  | 4.21691800  | -4.19490300 |
| H | 3.93230600  | 4.48741000  | -3.09700500 |
| C | 0.71717900  | 3.43453800  | -2.29135200 |
| H | 0.26210800  | 2.67462500  | -1.65070800 |
| H | 0.37654900  | 3.25469400  | -3.31705200 |
| H | 0.36057500  | 4.42336500  | -1.97604900 |
| C | 3.96772400  | 1.43593800  | 2.16377800  |
| H | 3.48317400  | 0.54730800  | 1.74528400  |
| C | 5.47765100  | 1.23382500  | 2.00976000  |
| H | 6.02242500  | 2.13625400  | 2.31110900  |
| H | 5.74977200  | 0.99412400  | 0.97776400  |
| H | 5.81961000  | 0.40662300  | 2.64261100  |
| C | 3.58348500  | 1.52133900  | 3.63835500  |
| H | 2.51824500  | 1.74289600  | 3.76368000  |
| H | 4.15697700  | 2.29348600  | 4.16445200  |
| H | 3.79376500  | 0.56766000  | 4.13430600  |
| C | 3.00683900  | -2.99285900 | -0.29871700 |
| C | 2.10950100  | -3.85508800 | -0.94950300 |
| C | 1.81280400  | -5.07919400 | -0.34468300 |
| H | 1.10997200  | -5.75174800 | -0.82958900 |
| C | 2.39852100  | -5.44888700 | 0.85596700  |
| H | 2.15481300  | -6.40505600 | 1.31082200  |
| C | 3.29815300  | -4.59171200 | 1.47890800  |
| H | 3.74954300  | -4.88711400 | 2.42118200  |
| C | 3.61151300  | -3.35032800 | 0.92656200  |
| C | 1.47919500  | -3.50618300 | -2.28212100 |
| H | 1.89741900  | -2.55592400 | -2.62619400 |
| C | 1.79701300  | -4.56515900 | -3.34162000 |
| H | 1.33065000  | -5.52792100 | -3.10185500 |
| H | 2.87510900  | -4.73624400 | -3.43502300 |
| H | 1.41474300  | -4.24730600 | -4.31807600 |
| C | -0.03236200 | -3.31750100 | -2.15570300 |
| H | -0.51699000 | -4.24711900 | -1.83605900 |
| H | -0.45827500 | -3.02385200 | -3.12152400 |
| H | -0.28631600 | -2.53564900 | -1.43486400 |
| C | 4.58368200  | -2.41565400 | 1.62627400  |
| H | 4.30813300  | -1.39359900 | 1.34251300  |
| C | 6.02512500  | -2.64003400 | 1.15803000  |
| H | 6.33257900  | -3.67716900 | 1.33667800  |
| H | 6.70967000  | -1.98329300 | 1.70744800  |
| H | 6.14732500  | -2.42653500 | 0.09332400  |
| C | 4.51914800  | -2.50967800 | 3.15054900  |
| H | 3.49391500  | -2.42580800 | 3.52358100  |
| H | 5.11117200  | -1.70303700 | 3.59713000  |
| H | 4.93846500  | -3.45341900 | 3.51796200  |
| C | -2.71297000 | 2.38317400  | -0.04191100 |
| C | -3.40078400 | 3.63981000  | -0.43704100 |
| C | -4.68940800 | 3.87283000  | 0.04982900  |
| H | -5.16216700 | 3.12669100  | 0.68229600  |
| C | -5.35158900 | 5.05518000  | -0.26035500 |
| H | -6.35389000 | 5.22743300  | 0.12132500  |
| C | -4.72767900 | 6.01793600  | -1.04985000 |
| H | -5.24240200 | 6.94473300  | -1.28692600 |
| C | -3.44317500 | 5.78895200  | -1.53564600 |
| H | -2.95254500 | 6.53498600  | -2.15439200 |
| C | -2.78228300 | 4.60210000  | -1.23554100 |
| H | -1.78747200 | 4.41527400  | -1.62558800 |
| C | -3.34581200 | 0.90707400  | -2.01917200 |
| C | -4.86327400 | 0.86410800  | -1.81436700 |
| H | -5.12038600 | 0.13491100  | -1.03934700 |
| H | -5.35454600 | 0.55618500  | -2.74495300 |
| H | -5.26053000 | 1.84504900  | -1.53631000 |
| C | -2.97698600 | 1.89540000  | -3.12973700 |
| H | -3.38850600 | 2.89162800  | -2.95567800 |
| H | -3.37646100 | 1.53308700  | -4.08326600 |

|   |             |             |             |
|---|-------------|-------------|-------------|
| H | -1.88815400 | 1.96840800  | -3.22040700 |
| C | -2.86704200 | -0.47870500 | -2.45566800 |
| H | -3.19260900 | -1.24800200 | -1.75276200 |
| H | -1.77637500 | -0.51046100 | -2.53273500 |
| H | -3.29771900 | -0.70380600 | -3.43793700 |
| C | -1.50626200 | 3.15926000  | 2.01368300  |
| C | -2.48643100 | 4.24436700  | 2.47021900  |
| H | -3.40190100 | 3.79712200  | 2.87354400  |
| H | -2.76216200 | 4.93012700  | 1.66624300  |
| H | -2.01896800 | 4.83436300  | 3.26656900  |
| C | -0.97772600 | 2.43625700  | 3.25416400  |
| H | -0.40462400 | 3.14590500  | 3.86087400  |
| H | -0.32122900 | 1.61634100  | 2.95654500  |
| H | -1.78760800 | 2.04357700  | 3.87286900  |
| C | -0.30694200 | 3.78486400  | 1.29996100  |
| H | 0.20775000  | 4.48973900  | 1.96078600  |
| H | -0.61683400 | 4.33079600  | 0.40399600  |
| H | 0.40200700  | 3.00349200  | 1.01182600  |
| C | 0.69448300  | -0.64967200 | 0.88292000  |
| H | 0.17302800  | -1.53133600 | 0.47338400  |
| C | 1.24289400  | -1.07417800 | 2.23349000  |
| H | 1.86606800  | -0.28061500 | 2.65883400  |
| H | 1.90057900  | -1.93159700 | 2.05454700  |
| C | 0.15823600  | -1.46986700 | 3.22782200  |
| H | -0.43583000 | -0.60225300 | 3.52846300  |
| H | -0.53154400 | -2.20286800 | 2.79469000  |
| H | 0.59531500  | -1.90418500 | 4.13443300  |
| C | -3.26422900 | -0.41461300 | 1.74646200  |
| O | -3.10713900 | -1.84093100 | 1.85451100  |
| H | -4.17719300 | -0.21466300 | 1.16120800  |
| C | -3.50597800 | 0.12643600  | 3.14449600  |
| H | -2.62515600 | -0.05828400 | 3.77072200  |
| H | -3.62203400 | 1.21263700  | 3.06398100  |
| C | -4.73746200 | -0.48225300 | 3.80523600  |
| H | -4.91135800 | -0.05362000 | 4.79863600  |
| H | -5.63530800 | -0.30414000 | 3.19951900  |
| H | -4.62047200 | -1.56419100 | 3.91920100  |
| H | -1.67814100 | -1.02694600 | -0.16792500 |
| C | -4.39585100 | -4.52843900 | -0.05634100 |
| C | -5.40498900 | -3.37719500 | -0.37723400 |
| O | -4.68250700 | -2.21247100 | 0.06036300  |
| O | -3.69954400 | -4.02022400 | 1.09358100  |
| C | -5.75200700 | -3.21924200 | -1.84587300 |
| H | -6.24144400 | -4.12236800 | -2.22699400 |
| H | -6.44175200 | -2.37868600 | -1.97289800 |
| H | -4.86328700 | -3.01953000 | -2.44825900 |
| C | -6.67467500 | -3.45280700 | 0.46425500  |
| H | -6.43421000 | -3.58339800 | 1.52443500  |
| H | -7.22713400 | -2.51465800 | 0.35387100  |
| H | -7.32306000 | -4.27647500 | 0.14877700  |
| C | -3.36084500 | -4.72338300 | -1.15858600 |
| H | -2.56726900 | -5.37522000 | -0.78079600 |
| H | -3.79607800 | -5.18495200 | -2.05093100 |
| H | -2.90461000 | -3.77015300 | -1.44326900 |
| C | -5.03861600 | -5.85436400 | 0.30662800  |
| H | -5.64542700 | -6.23283900 | -0.52353500 |
| H | -4.25963800 | -6.59196700 | 0.52304200  |
| H | -5.67131800 | -5.76186700 | 1.19232100  |
| B | -3.79225600 | -2.64933000 | 1.02644500  |

Cartesian coordinates of the optimized geometry of TS-2 at PBE0-D3BJ/6-31G\* level of theory:

|    |             |             |             |
|----|-------------|-------------|-------------|
| Ga | 0.92817300  | -0.01445500 | -0.69644500 |
| Cl | 0.86323400  | -0.75119800 | -2.82107600 |
| Si | -1.01244200 | -0.44771200 | 0.52291000  |
| N  | 2.91550100  | -0.12612400 | -0.43428300 |
| N  | 1.01492500  | 1.95828600  | -1.06274300 |

|   |             |             |             |
|---|-------------|-------------|-------------|
| C | 3.69597600  | 0.66041900  | -1.18196500 |
| C | 3.25834000  | 1.78386600  | -1.89011700 |
| H | 4.00385600  | 2.27996600  | -2.49891800 |
| C | 2.04453500  | 2.45898400  | -1.73895700 |
| C | 5.17482500  | 0.38012500  | -1.25521500 |
| H | 5.36769800  | -0.56969800 | -1.76232500 |
| H | 5.61131500  | 0.29331000  | -0.25643800 |
| H | 5.68969800  | 1.17434800  | -1.79823200 |
| C | 1.98697200  | 3.86025700  | -2.28894500 |
| H | 2.27022400  | 4.58256200  | -1.51512800 |
| H | 0.98425800  | 4.12685500  | -2.62890600 |
| H | 2.69103600  | 3.96676000  | -3.11802800 |
| C | 3.58336200  | -1.15207200 | 0.31691200  |
| C | 3.92854300  | -2.37133000 | -0.29707900 |
| C | 4.59586200  | -3.33585200 | 0.46104100  |
| H | 4.85402300  | -4.28422600 | -0.00232900 |
| C | 4.94372800  | -3.10410700 | 1.78297300  |
| H | 5.47315000  | -3.86323600 | 2.35232900  |
| C | 4.60937000  | -1.89350300 | 2.37270700  |
| H | 4.88379100  | -1.70888700 | 3.40774400  |
| C | 3.91833100  | -0.90930300 | 1.66500200  |
| C | 3.58648200  | -2.68379500 | -1.73911000 |
| H | 3.23679300  | -1.76697100 | -2.22116000 |
| C | 4.77939100  | -3.21111600 | -2.53876500 |
| H | 5.10842100  | -4.19362100 | -2.18117400 |
| H | 5.64308000  | -2.53854200 | -2.49106400 |
| H | 4.49810900  | -3.32431700 | -3.59152300 |
| C | 2.43110900  | -3.68149600 | -1.78688300 |
| H | 1.59892600  | -3.31854000 | -1.18319100 |
| H | 2.73884800  | -4.65854200 | -1.39350100 |
| H | 2.07466100  | -3.81489700 | -2.81377600 |
| C | 3.55269400  | 0.38474700  | 2.36714600  |
| H | 2.87243100  | 0.93356600  | 1.70821800  |
| C | 4.78742600  | 1.26274900  | 2.58596400  |
| H | 5.51917400  | 0.76076800  | 3.22995400  |
| H | 4.50758900  | 2.20683600  | 3.06864700  |
| H | 5.28271600  | 1.50441600  | 1.63975900  |
| C | 2.82303100  | 0.12523200  | 3.68805400  |
| H | 3.42157800  | -0.49010000 | 4.36808900  |
| H | 1.86770400  | -0.38068500 | 3.51965500  |
| H | 2.61611300  | 1.06854900  | 4.20291200  |
| C | -0.01628800 | 2.86280100  | -0.67713900 |
| C | -1.25152800 | 2.88670500  | -1.35816600 |
| C | -2.18558000 | 3.85639900  | -0.98659000 |
| H | -3.13745800 | 3.90511200  | -1.50507600 |
| C | -1.92451800 | 4.76850300  | 0.02875200  |
| H | -2.66820300 | 5.51514700  | 0.29389500  |
| C | -0.72003500 | 4.70786100  | 0.71203800  |
| H | -0.52804700 | 5.40149200  | 1.52606900  |
| C | 0.24680300  | 3.75834700  | 0.37737900  |
| C | -1.55698100 | 1.90426000  | -2.47300400 |
| H | -1.21358900 | 0.92138700  | -2.13035300 |
| C | -0.79166600 | 2.21303200  | -3.76131700 |
| H | -1.01594800 | 3.22555300  | -4.11941400 |
| H | -1.08170500 | 1.50191400  | -4.54239400 |
| H | 0.28518100  | 2.10718000  | -3.62299300 |
| C | -3.04779000 | 1.78071400  | -2.76940900 |
| H | -3.62033600 | 1.58532700  | -1.85529000 |
| H | -3.21662700 | 0.95346200  | -3.46542700 |
| H | -3.45067500 | 2.68660900  | -3.23808200 |
| C | 1.51481500  | 3.66240900  | 1.20225300  |
| H | 2.23767300  | 3.04665300  | 0.65769000  |
| C | 2.16741400  | 5.01750800  | 1.47177300  |
| H | 3.13358800  | 4.87499400  | 1.96856200  |
| H | 1.55347200  | 5.64292600  | 2.12974400  |
| H | 2.34115300  | 5.57875100  | 0.54717000  |
| C | 1.20064000  | 2.93870900  | 2.51181800  |
| H | 2.09285100  | 2.88309300  | 3.14367700  |
| H | 0.84831000  | 1.92102900  | 2.31556000  |



|   |             |             |             |
|---|-------------|-------------|-------------|
| H | 0.41932800  | 3.46465000  | 3.07251600  |
| N | -2.76125100 | 0.09179200  | 1.04136800  |
| N | -2.28761100 | -1.69159000 | -0.09262300 |
| C | -3.28763300 | -0.95603700 | 0.43493000  |
| C | -4.73425800 | -1.27907300 | 0.37988400  |
| C | -5.25543400 | -2.23883800 | 1.25091600  |
| H | -4.59148900 | -2.74500800 | 1.94559000  |
| C | -6.61017900 | -2.54648100 | 1.21723900  |
| H | -7.00993200 | -3.29261700 | 1.89777400  |
| C | -7.44997700 | -1.90532300 | 0.30927400  |
| H | -8.50752700 | -2.15142300 | 0.27941200  |
| C | -6.93272300 | -0.94754400 | -0.55846200 |
| H | -7.58383600 | -0.44393700 | -1.26709500 |
| C | -5.57901900 | -0.62787100 | -0.51981700 |
| H | -5.17449500 | 0.12363900  | -1.19090500 |
| C | -2.41726300 | -2.62114300 | -1.24136700 |
| C | -1.09758300 | -3.36095000 | -1.40540700 |
| H | -0.88694500 | -3.99659100 | -0.54291000 |
| H | -0.27533000 | -2.66306000 | -1.55248200 |
| H | -1.14954500 | -3.99520300 | -2.29632300 |
| C | -3.51303900 | -3.66979400 | -1.02672700 |
| H | -3.40931800 | -4.14790100 | -0.04709800 |
| H | -3.39951100 | -4.44372400 | -1.79328100 |
| H | -4.52230400 | -3.26463800 | -1.11539300 |
| C | -2.69434500 | -1.81184000 | -2.50911400 |
| H | -3.64230600 | -1.26978200 | -2.43084900 |
| H | -2.75278500 | -2.47322400 | -3.38049000 |
| H | -1.88033400 | -1.10121700 | -2.67515200 |
| C | -3.30859900 | 0.98586000  | 2.06836400  |
| C | -3.80970900 | 0.17914500  | 3.26850000  |
| H | -3.02225000 | -0.49656000 | 3.61860100  |
| H | -4.69952500 | -0.40666000 | 3.02137200  |
| H | -4.07159100 | 0.85843600  | 4.08721800  |
| C | -4.41841100 | 1.87015100  | 1.49837800  |
| H | -4.73272300 | 2.59691500  | 2.25570200  |
| H | -5.29582800 | 1.28699700  | 1.20686600  |
| H | -4.04935800 | 2.42292000  | 0.62852000  |
| C | -2.14115100 | 1.86309700  | 2.51133400  |
| H | -1.35839900 | 1.25228500  | 2.97043900  |
| H | -2.48344300 | 2.60410600  | 3.24108100  |
| H | -1.71519400 | 2.39531200  | 1.65672100  |
| O | -0.36251300 | -0.80253900 | 2.01553000  |
| C | 0.61687100  | -1.59117000 | 1.26396200  |
| H | 1.60247300  | -1.23329400 | 1.56089900  |
| C | 0.50147200  | -3.05996500 | 1.58657000  |
| H | 1.13502900  | -3.63109500 | 0.89715800  |
| H | -0.53220400 | -3.38695400 | 1.41937600  |
| C | 0.90361600  | -3.37453700 | 3.02721100  |
| H | 0.76830700  | -4.43748300 | 3.26295400  |
| H | 1.95684900  | -3.12351500 | 3.19767500  |
| H | 0.29697200  | -2.78989800 | 3.72728700  |

Cartesian coordinates of the optimized geometry of TS-7 at PBE0-D3BJ/6-31G\* level of theory:

|    |             |             |             |
|----|-------------|-------------|-------------|
| Ga | 2.28441600  | -0.28652700 | -0.50536700 |
| Cl | 1.45223700  | 0.28465900  | -2.47968100 |
| Si | -1.56665700 | 0.70051200  | 0.49586700  |
| O  | 0.07304900  | 0.68929600  | 0.85024600  |
| N  | 3.85657600  | 0.86867100  | -0.32869800 |
| N  | 3.31258000  | -1.88657800 | -0.99988700 |
| N  | -2.14053400 | 1.56566500  | -1.02296500 |
| N  | -1.53788500 | 2.67061100  | 0.73060200  |
| C  | 4.88983100  | 0.66850500  | -1.14421200 |
| C  | 5.10564400  | -0.52262400 | -1.84930500 |
| H  | 5.97245600  | -0.53304000 | -2.49884700 |
| C  | 4.42969500  | -1.74041700 | -1.71074500 |
| C  | 5.91258100  | 1.75427800  | -1.34258400 |

|   |             |             |             |
|---|-------------|-------------|-------------|
| H | 6.89761500  | 1.32850200  | -1.54574600 |
| H | 5.97815300  | 2.42475000  | -0.48430600 |
| H | 5.62408200  | 2.35845100  | -2.21109600 |
| C | 5.03813100  | -2.94029500 | -2.38376700 |
| H | 5.05855700  | -3.80670200 | -1.71752100 |
| H | 6.05375900  | -2.72468300 | -2.71992100 |
| H | 4.43915900  | -3.22428000 | -3.25595900 |
| C | 3.77726500  | 2.04641300  | 0.47999800  |
| C | 3.24467300  | 3.23325800  | -0.05308100 |
| C | 3.11644300  | 4.33875100  | 0.79140000  |
| H | 2.69625900  | 5.26022300  | 0.39686900  |
| C | 3.51280500  | 4.27947900  | 2.11852800  |
| H | 3.39699700  | 5.14701500  | 2.76227200  |
| C | 4.06464600  | 3.10779300  | 2.62234200  |
| H | 4.38406000  | 3.07340600  | 3.65915800  |
| C | 4.21216900  | 1.97575900  | 1.82060800  |
| C | 2.82039200  | 3.34896300  | -1.50219700 |
| H | 3.06611700  | 2.41525900  | -2.01426900 |
| C | 3.55474900  | 4.48601600  | -2.21753700 |
| H | 3.28079800  | 5.46335800  | -1.80341900 |
| H | 3.29132500  | 4.49348700  | -3.28118000 |
| H | 4.64232000  | 4.38860900  | -2.13504200 |
| C | 1.30939900  | 3.54052900  | -1.62010400 |
| H | 0.76066000  | 2.79592300  | -1.03750300 |
| H | 0.99936400  | 3.44558100  | -2.66669400 |
| H | 1.02477100  | 4.53878800  | -1.26726300 |
| C | 4.87655800  | 0.72421100  | 2.36591100  |
| H | 4.43531000  | -0.13215400 | 1.84584200  |
| C | 6.37655500  | 0.71033300  | 2.05250600  |
| H | 6.86833400  | 1.59599100  | 2.47146100  |
| H | 6.56819500  | 0.69036700  | 0.97696400  |
| H | 6.84758500  | -0.17805600 | 2.48933200  |
| C | 4.66348000  | 0.52196700  | 3.86481800  |
| H | 3.60767200  | 0.59318500  | 4.14292300  |
| H | 5.22236300  | 1.25571800  | 4.45699600  |
| H | 5.02762900  | -0.46824400 | 4.15981000  |
| C | 2.81062300  | -3.19788800 | -0.73549200 |
| C | 2.02432800  | -3.87892500 | -1.68293000 |
| C | 1.59142100  | -5.17081600 | -1.37279500 |
| H | 0.98428200  | -5.71193200 | -2.09334400 |
| C | 1.91674800  | -5.77240000 | -0.16597500 |
| H | 1.57650200  | -6.78182100 | 0.04928400  |
| C | 2.67002700  | -5.07594700 | 0.77086500  |
| H | 2.91111800  | -5.54586400 | 1.71950000  |
| C | 3.12658600  | -3.78510800 | 0.50702500  |
| C | 1.59828700  | -3.24748300 | -2.99218200 |
| H | 2.16064600  | -2.31893800 | -3.13052400 |
| C | 1.86498400  | -4.14962500 | -4.19852100 |
| H | 1.23516500  | -5.04639600 | -4.18335000 |
| H | 2.90827000  | -4.48142600 | -4.24182400 |
| H | 1.64039500  | -3.60982100 | -5.12468100 |
| C | 0.11841900  | -2.86632100 | -2.92540200 |
| H | -0.51321300 | -3.75435000 | -2.79666900 |
| H | -0.19052500 | -2.35319700 | -3.84190100 |
| H | -0.06807700 | -2.18274600 | -2.09350200 |
| C | 3.98152800  | -3.04194000 | 1.51328800  |
| H | 3.79255900  | -1.97712900 | 1.34523400  |
| C | 5.47704300  | -3.26339800 | 1.27212500  |
| H | 5.72544700  | -4.33011600 | 1.31822700  |
| H | 6.06467100  | -2.74479700 | 2.03886700  |
| H | 5.79198700  | -2.87696400 | 0.29907000  |
| C | 3.62284000  | -3.37090500 | 2.96064700  |
| H | 2.54431400  | -3.30415600 | 3.13753200  |
| H | 4.12196400  | -2.67141500 | 3.63981500  |
| H | 3.94980300  | -4.37919200 | 3.23959100  |
| C | -2.11496400 | 2.78732700  | -0.44206200 |
| C | -2.74274000 | 4.02357700  | -0.97696700 |
| C | -4.02383600 | 4.35852200  | -0.53125500 |
| H | -4.54914700 | 3.68418200  | 0.13930300  |

|   |             |             |             |
|---|-------------|-------------|-------------|
| C | -4.62786100 | 5.53529700  | -0.96104700 |
| H | -5.62608800 | 5.78531700  | -0.61350600 |
| C | -3.95586700 | 6.38583700  | -1.83501900 |
| H | -4.42668800 | 7.30626000  | -2.16852900 |
| C | -2.68038200 | 6.05218900  | -2.28276000 |
| H | -2.15177700 | 6.71168500  | -2.96519300 |
| C | -2.07460700 | 4.87451600  | -1.85779500 |
| H | -1.07624500 | 4.61973600  | -2.19627100 |
| C | -2.76150600 | 1.18574400  | -2.30821100 |
| C | -4.26981100 | 1.44923700  | -2.29650600 |
| H | -4.71370400 | 0.97514300  | -1.41546900 |
| H | -4.72205500 | 1.00939000  | -3.19279600 |
| H | -4.50267500 | 2.51729700  | -2.29722300 |
| C | -2.06995100 | 1.91931800  | -3.46061400 |
| H | -2.26177500 | 2.99433000  | -3.43767700 |
| H | -2.45051000 | 1.53788300  | -4.41446100 |
| H | -0.98950100 | 1.74479900  | -3.42352200 |
| C | -2.54616100 | -0.31143800 | -2.50058100 |
| H | -3.17344600 | -0.88012600 | -1.81032900 |
| H | -1.49092500 | -0.56570100 | -2.37166000 |
| H | -2.84236200 | -0.58478000 | -3.51896300 |
| C | -1.25148600 | 3.65823600  | 1.77633000  |
| C | -2.47523800 | 3.86194700  | 2.67710200  |
| H | -2.79775500 | 2.92038000  | 3.13004500  |
| H | -3.31321800 | 4.28260600  | 2.11259900  |
| H | -2.22865100 | 4.55905200  | 3.48599600  |
| C | -0.09770100 | 3.08987400  | 2.60626400  |
| H | 0.19356500  | 3.81010000  | 3.37821500  |
| H | 0.76379300  | 2.87205500  | 1.97117500  |
| H | -0.39160100 | 2.15846300  | 3.09792400  |
| C | -0.81263800 | 5.01622700  | 1.22243600  |
| H | -0.47028600 | 5.63942500  | 2.05578800  |
| H | -1.62239400 | 5.54850200  | 0.71965200  |
| H | 0.02056800  | 4.89743200  | 0.52593200  |
| C | 0.96039700  | -0.41046100 | 0.95864700  |
| H | 0.41912600  | -1.35328700 | 0.82545500  |
| C | 1.57767300  | -0.39559600 | 2.34816500  |
| H | 2.00895200  | 0.59795200  | 2.51167200  |
| H | 2.41129100  | -1.10238700 | 2.37861300  |
| C | 0.60192100  | -0.73398600 | 3.46570900  |
| H | -0.26264400 | -0.06600400 | 3.45398100  |
| H | 0.22519700  | -1.75950800 | 3.36649800  |
| H | 1.07732700  | -0.65004000 | 4.44969200  |
| C | -3.19374200 | 0.51134200  | 1.52887100  |
| O | -4.09957500 | -0.20018900 | 0.71822000  |
| H | -3.58368600 | 1.54097600  | 1.54361000  |
| C | -3.09308400 | 0.08064200  | 2.99042800  |
| H | -2.72892000 | -0.94879500 | 3.06254300  |
| H | -2.33015500 | 0.71331500  | 3.46826800  |
| C | -4.41363600 | 0.22364900  | 3.73980300  |
| H | -4.29971300 | -0.05636100 | 4.79351100  |
| H | -4.76887800 | 1.26203600  | 3.70477500  |
| H | -5.17713300 | -0.41765900 | 3.29199100  |
| H | -1.53742900 | -0.86331400 | 0.05669600  |
| C | -6.08500100 | -2.59394100 | -0.46523900 |
| C | -6.21153600 | -2.99550300 | 1.04014800  |
| O | -5.41641200 | -2.01189600 | 1.68254200  |
| O | -4.75045300 | -2.11458500 | -0.53898200 |
| C | -7.62369800 | -2.92383100 | 1.59948000  |
| H | -8.29923300 | -3.59824800 | 1.06006600  |
| H | -7.61745200 | -3.21997300 | 2.65394900  |
| H | -8.01690400 | -1.90627000 | 1.53803700  |
| C | -5.61684000 | -4.37644700 | 1.32262400  |
| H | -4.62612700 | -4.47297900 | 0.86922300  |
| H | -5.50735500 | -4.49345700 | 2.40546200  |
| H | -6.25389000 | -5.18501000 | 0.94674100  |
| C | -7.01927900 | -1.44162600 | -0.83480200 |
| H | -6.73082900 | -1.06133500 | -1.82019300 |
| H | -8.06906800 | -1.75320800 | -0.87514700 |

|   |             |             |             |
|---|-------------|-------------|-------------|
| H | -6.91651800 | -0.62502500 | -0.11364400 |
| C | -6.25579600 | -3.73899800 | -1.45013400 |
| H | -7.25222200 | -4.18823900 | -1.36637000 |
| H | -6.13666800 | -3.36526400 | -2.47286500 |
| H | -5.50563700 | -4.51709300 | -1.28595500 |
| B | -4.40657200 | -1.59303900 | 0.75933500  |
| C | -2.16012700 | -2.46955700 | 0.31171200  |
| H | -2.46194400 | -2.40676800 | -0.73756000 |
| O | -3.04252000 | -2.32534400 | 1.20034900  |
| C | -0.98538900 | -3.32787700 | 0.66133500  |
| H | -0.15122700 | -3.17167800 | -0.02593400 |
| H | -0.65615500 | -3.09548400 | 1.67813900  |
| C | -1.45209900 | -4.78654100 | 0.58855100  |
| H | -0.62047600 | -5.45062800 | 0.83609600  |
| H | -2.27263800 | -4.96388600 | 1.28935300  |
| H | -1.79890900 | -5.04177200 | -0.41921200 |

Cartesian coordinates of the optimized geometry of TS-10 at PBE0-D3BJ/6-31G\* level of theory:

|    |             |             |             |
|----|-------------|-------------|-------------|
| Ga | -1.88403700 | -0.61295200 | -0.60217700 |
| Cl | -1.23817500 | -0.84839900 | -2.71080100 |
| Si | 2.16152000  | 0.55552800  | 0.34431300  |
| O  | 0.66468700  | -0.15264200 | 0.26257500  |
| N  | -2.59864600 | -2.39360800 | -0.21593300 |
| N  | -3.64619000 | 0.19581600  | -0.90478000 |
| N  | 2.98574600  | 0.15467300  | -1.23257300 |
| N  | 3.25441200  | -0.90671500 | 0.61534500  |
| C  | -3.65767700 | -2.80848000 | -0.91433100 |
| C  | -4.56667400 | -1.94077000 | -1.52411900 |
| H  | -5.38790000 | -2.40776600 | -2.05447200 |
| C  | -4.62447400 | -0.54259800 | -1.41636200 |
| C  | -3.90626500 | -4.28347700 | -1.06951500 |
| H  | -3.29111300 | -4.65280700 | -1.89995400 |
| H  | -4.95249200 | -4.48773700 | -1.30555000 |
| H  | -3.61779900 | -4.84856600 | -0.18140800 |
| C  | -5.88646900 | 0.11854300  | -1.89892500 |
| H  | -6.13716600 | 0.99739300  | -1.30063600 |
| H  | -6.72184400 | -0.58404900 | -1.87509400 |
| H  | -5.75765400 | 0.45593900  | -2.93336100 |
| C  | -1.89334900 | -3.29976900 | 0.63439200  |
| C  | -0.76314300 | -3.98566300 | 0.15790600  |
| C  | -0.04949200 | -4.78680800 | 1.05276500  |
| H  | 0.83183400  | -5.31704900 | 0.70110800  |
| C  | -0.45138900 | -4.92434200 | 2.37312200  |
| H  | 0.11838200  | -5.54970800 | 3.05497600  |
| C  | -1.59264900 | -4.26812300 | 2.81870900  |
| H  | -1.90810700 | -4.39034100 | 3.85066400  |
| C  | -2.33135400 | -3.44569900 | 1.96849800  |
| C  | -0.32364500 | -3.90048900 | -1.28869200 |
| H  | -1.06800400 | -3.32106400 | -1.84016800 |
| C  | -0.25283200 | -5.28712100 | -1.93293100 |
| H  | 0.53173000  | -5.90476800 | -1.48014000 |
| H  | -0.02398800 | -5.19340800 | -3.00045200 |
| H  | -1.19919000 | -5.83011800 | -1.83257600 |
| C  | 1.01231100  | -3.17093300 | -1.43128900 |
| H  | 0.98819200  | -2.18663500 | -0.95663000 |
| H  | 1.24818700  | -3.02888200 | -2.49217600 |
| H  | 1.82053700  | -3.75395300 | -0.97284000 |
| C  | -3.58088400 | -2.74778200 | 2.47668100  |
| H  | -3.75818600 | -1.87785800 | 1.83440900  |
| C  | -4.81583800 | -3.64768400 | 2.35772200  |
| H  | -4.67517800 | -4.57502700 | 2.92548900  |
| H  | -5.02970000 | -3.91492800 | 1.31984900  |
| H  | -5.69864800 | -3.13524400 | 2.75774700  |
| C  | -3.44737000 | -2.25485200 | 3.91819100  |
| H  | -2.53140300 | -1.67625400 | 4.07120500  |
| H  | -3.44371300 | -3.08643900 | 4.63205800  |

|   |             |             |             |
|---|-------------|-------------|-------------|
| H | -4.30218600 | -1.61903400 | 4.17499700  |
| C | -3.80638500 | 1.60292800  | -0.72518400 |
| C | -3.67094400 | 2.49207300  | -1.80695900 |
| C | -3.83163300 | 3.85731900  | -1.55537100 |
| H | -3.73056000 | 4.55991100  | -2.37825900 |
| C | -4.10236800 | 4.33229900  | -0.28083700 |
| H | -4.22322600 | 5.39864900  | -0.11012800 |
| C | -4.21148100 | 3.44072400  | 0.77987600  |
| H | -4.41194200 | 3.81862800  | 1.77775500  |
| C | -4.05817500 | 2.06986300  | 0.58077600  |
| C | -3.33778000 | 2.02959600  | -3.21175700 |
| H | -3.36301500 | 0.93572800  | -3.23271000 |
| C | -4.33724600 | 2.55588000  | -4.24517000 |
| H | -4.26594400 | 3.64416000  | -4.35454200 |
| H | -5.37299600 | 2.32186600  | -3.97664300 |
| H | -4.12990100 | 2.11522700  | -5.22649800 |
| C | -1.91579000 | 2.44555800  | -3.59414800 |
| H | -1.82015300 | 3.53766100  | -3.62434000 |
| H | -1.65910700 | 2.05031700  | -4.58302700 |
| H | -1.18575900 | 2.05472900  | -2.88262900 |
| C | -4.21377200 | 1.08757500  | 1.72365800  |
| H | -3.57035800 | 0.23480200  | 1.48422900  |
| C | -5.64467800 | 0.54982100  | 1.80686200  |
| H | -6.35864800 | 1.36820700  | 1.95575600  |
| H | -5.74362800 | -0.14427200 | 2.65000800  |
| H | -5.92609900 | 0.00972300  | 0.89830600  |
| C | -3.77027000 | 1.65008700  | 3.06989100  |
| H | -2.77708300 | 2.10428700  | 3.00797300  |
| H | -3.73074200 | 0.84970600  | 3.81620700  |
| H | -4.46929400 | 2.40728000  | 3.44347000  |
| C | 3.74780400  | -0.75034200 | -0.61339000 |
| C | 4.96346000  | -1.38884000 | -1.16055400 |
| C | 6.17738900  | -0.70621000 | -1.04340300 |
| H | 6.18450900  | 0.24635200  | -0.51892700 |
| C | 7.33284200  | -1.27909800 | -1.56327500 |
| H | 8.27965300  | -0.75439400 | -1.47160900 |
| C | 7.28074500  | -2.52106000 | -2.19313000 |
| H | 8.18689900  | -2.96329300 | -2.59792100 |
| C | 6.06872600  | -3.19768900 | -2.30309700 |
| H | 6.02561500  | -4.16514800 | -2.79519700 |
| C | 4.90617900  | -2.63344200 | -1.78719900 |
| H | 3.95283800  | -3.14425800 | -1.88622900 |
| C | 3.09789700  | 0.79953900  | -2.54485000 |
| C | 4.17347200  | 1.88711300  | -2.51006000 |
| H | 3.94174300  | 2.62011600  | -1.73253800 |
| H | 4.20860800  | 2.40264100  | -3.47681100 |
| H | 5.16070700  | 1.46198700  | -2.30962000 |
| C | 3.38740800  | -0.22490700 | -3.64157400 |
| H | 4.39399700  | -0.64287100 | -3.56796200 |
| H | 3.29842400  | 0.26602800  | -4.61634000 |
| H | 2.65912000  | -1.04225300 | -3.60410700 |
| C | 1.73236600  | 1.43442000  | -2.80279800 |
| H | 1.53722700  | 2.21536100  | -2.06145600 |
| H | 0.94062200  | 0.68185900  | -2.75235900 |
| H | 1.71651000  | 1.89668300  | -3.79560400 |
| C | 3.73459700  | -1.72163200 | 1.73852800  |
| C | 5.21812000  | -1.49098800 | 2.03727400  |
| H | 5.42849800  | -0.41798300 | 2.02558200  |
| H | 5.85899600  | -1.98296800 | 1.30070000  |
| H | 5.45815700  | -1.91055900 | 3.02087600  |
| C | 2.89980400  | -1.29460000 | 2.94130000  |
| H | 3.19351600  | -1.86710400 | 3.82653900  |
| H | 1.83709400  | -1.47502500 | 2.75394400  |
| H | 3.05276600  | -0.23196200 | 3.15683500  |
| C | 3.46471200  | -3.20035000 | 1.45469700  |
| H | 3.78479200  | -3.80354000 | 2.31201300  |
| H | 4.02252400  | -3.54258800 | 0.57766900  |
| H | 2.39716100  | -3.37188700 | 1.28860200  |
| C | -0.64029800 | 0.18971000  | 0.72008300  |

|   |             |             |             |
|---|-------------|-------------|-------------|
| H | -0.75608400 | 1.27957200  | 0.77144100  |
| C | -0.86165900 | -0.39243500 | 2.11186300  |
| H | -0.51043900 | -1.43033200 | 2.08459100  |
| H | -1.93688400 | -0.45093400 | 2.31121400  |
| C | -0.20439900 | 0.37571500  | 3.25023300  |
| H | 0.85862100  | 0.54885200  | 3.07185100  |
| H | -0.65451600 | 1.36407600  | 3.37237400  |
| H | -0.30273900 | -0.17190400 | 4.19543800  |
| C | 0.60300100  | 4.21561500  | 1.61644100  |
| C | 0.87595600  | 4.39632100  | 0.08606800  |
| B | 2.01532200  | 2.56887500  | 0.93145000  |
| O | 0.97473900  | 2.85218200  | 1.84302300  |
| O | 1.93459600  | 3.46586600  | -0.16805700 |
| H | 3.23127900  | 2.77158200  | 1.48974700  |
| C | 4.57087200  | 2.58963100  | 1.25914000  |
| O | 4.74105900  | 1.38063000  | 0.90857500  |
| H | 4.64384300  | 3.38331000  | 0.48212000  |
| C | 5.05690500  | 3.07055900  | 2.62375600  |
| H | 6.15665000  | 3.07482800  | 2.59001500  |
| H | 4.74068000  | 4.11241100  | 2.76701700  |
| C | 4.56903400  | 2.20104900  | 3.77019000  |
| H | 4.91501200  | 1.17095000  | 3.64830700  |
| H | 4.92669600  | 2.57002400  | 4.73745500  |
| H | 3.47183300  | 2.19073100  | 3.79565500  |
| C | 1.35586900  | 5.78582400  | -0.30615400 |
| H | 0.60028100  | 6.54427900  | -0.07024800 |
| H | 2.28667600  | 6.04536000  | 0.20316900  |
| H | 1.54241300  | 5.81530900  | -1.38437300 |
| C | 1.49909800  | 5.09170500  | 2.49015200  |
| H | 1.22423100  | 6.14977800  | 2.42761000  |
| H | 1.39803100  | 4.76632200  | 3.53025500  |
| H | 2.55087400  | 4.98756400  | 2.20635000  |
| C | -0.84876000 | 4.39215300  | 2.02479800  |
| H | -0.95060200 | 4.21604400  | 3.10113300  |
| H | -1.19522000 | 5.41025800  | 1.81296200  |
| H | -1.50135300 | 3.69246500  | 1.49812100  |
| C | -0.31265600 | 4.01057300  | -0.78572500 |
| H | -1.15163800 | 4.70280600  | -0.66730400 |
| H | -0.00197600 | 4.02835900  | -1.83429100 |
| H | -0.67408300 | 3.00178900  | -0.56516400 |

## V. References

- (1) G. M. Sheldrick, *Acta Crystallogr.*, 1990, **A46**, 467–473.
- (2) G. M. Sheldrick, SHELXL-2017, Program for the Refinement of Crystal Structures University of Göttingen, 2017. See also: G. M. Sheldrick, *Acta Cryst.*, 2015, **C71**, 3–8.
- (3) C. B. Hübschle, G. M. Sheldrick and B. Dittrich, *J. Appl. Cryst.*, 2011, **44**, 1281–1284.
